# Supplementary material for: Cobalt-promoted synthesis of sulfurated oxindoles via radical annulation of N-arylacrylamides with disulfides
Source: Royal Society of Chemistry journal article supplement (doi:10.1039/d2ob00877g), 2022-01-01

## **Cobalt-Promoted Synthesis of Sulfurated Oxindoles *via* Radical Annulation of *N*-arylacrylamides with Disulfides**

Fei Cheng,<sup>a,‡</sup> Xue Bai,<sup>b,‡</sup> Qi-Wen Sun,<sup>a</sup> Gao-Feng Zhu,<sup>a</sup> Yong-Xi Dong,<sup>a</sup> Yuan-Yong  
Yang,<sup>a</sup> Xiu-Li Gao,<sup>a</sup> Bing Guo,<sup>c</sup> Lei Tang,<sup>a,\*</sup> and Ji-Quan Zhang<sup>a,\*</sup>

<sup>a</sup>Guizhou Provincial Engineering Technology Research Center for Chemical Drug R&D, College of Pharmacy, Guizhou Medical University, Guiyang, 550025, China; E-mail addresses: [zjqgmc@163.com](mailto:zjqgmc@163.com).

<sup>b</sup>Pharmacy Department of Guizhou Provincial People's Hospital, Guiyang 55000, China.

<sup>c</sup>Guizhou Provincial Key Laboratory of Pathogenesis and Drug Research on Common Chronic Diseases, Guizhou Medical University, Guiyang 550025, China.

<sup>‡</sup>*These authors contributed equally to this work.*

### **Supporting Information**

|                                                                                                                     |            |
|---------------------------------------------------------------------------------------------------------------------|------------|
| <b>1. General information</b> .....                                                                                 | <b>S2</b>  |
| <b>2. Typical procedures for the synthesis of substrates</b> .....                                                  | <b>S3</b>  |
| <b>3. Chemical structures of the substrates 1 and 2</b> .....                                                       | <b>S4</b>  |
| <b>4. Optimization of the reaction conditions</b> .....                                                             | <b>S5</b>  |
| <b>5. Substrate scope of <i>N</i>-aryacrylamides bearing electron-withdrawing groups</b> .....                      | <b>S6</b>  |
| <b>6. General procedure for the cobalt-catalyzed synthesis of sulfurated oxindoles</b> .....                        | <b>S7</b>  |
| <b>7. General procedure for the synthesis of 4a-4h</b> .....                                                        | <b>S12</b> |
| <b>8. References</b> .....                                                                                          | <b>S1</b>  |
| <b>5</b>                                                                                                            |            |
| <b>9. <sup>1</sup>H NMR, <sup>13</sup>C NMR, <sup>19</sup>F and HRMS spectra of the synthesized compounds</b> ..... | <b>S16</b> |

**10. HRMS spectra of the control experiments.....S164**

## 1. General information

Unless otherwise stated, all the commercial reagents and solvents were used as such without further purification. The flash column chromatography was carried out over silica gel (200-300 mesh).  $^1\text{H}$  and  $^{13}\text{C}$  and spectra were recorded on a Bruker Avance NEO 400/600 MHz spectrometer. Chemical shifts in  $^1\text{H}$ -NMR spectra were reported in parts per million (ppm) downfield from the internal standard  $\text{Me}_4\text{Si}$  (TMS). Chemical shifts in  $^{13}\text{C}$  NMR spectra were reported relative to the central line of the chloroform signal ( $\delta = 77.06$  ppm).  $^1\text{H}$ -NMR spectral data are reported in terms of chemical shift ( $\delta$ , ppm), multiplicity, coupling constant (Hz), and integration.  $^{13}\text{C}$ -NMR spectral data are reported in terms of chemical shift ( $\delta$ , ppm) and multiplicity. Peaks were labeled as singlet (s), doublet (d), triplet (t), quartet (q), and multiplet (m).  $^{19}\text{F}$  NMR were recorded on a Bruker Avance NEO 400/600 MHz spectrometer. High resolution mass spectra were performed on Waters G2-XSQ-Tof mass spectrometer. Melting points were determined on a Tektronix X-4 melting point apparatus. Analytical TLC was performed using EM separations percolated silica gel 0.2 mm layer UV 254 fluorescent sheets.

## 2. Typical procedures for the synthesis of substrates

*N*-arylacrylamides **1** were prepared according to previous literatures.<sup>1-4</sup>

**Method A:** Substrate **1** were prepared according to literature.<sup>1-3</sup>

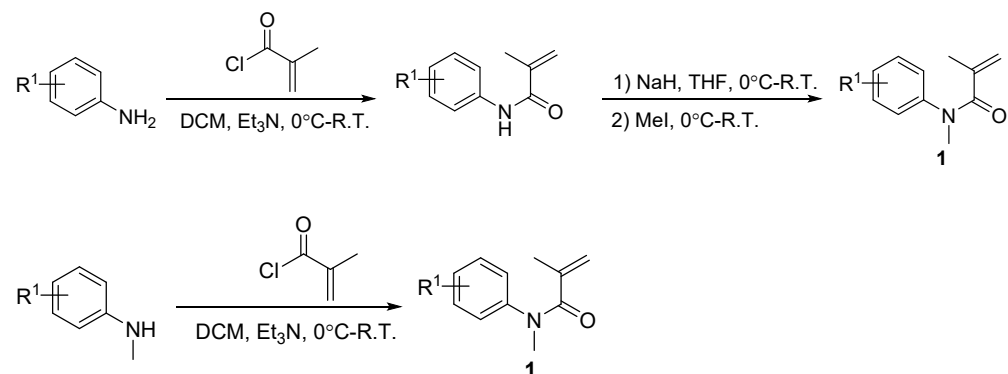

**Method B:** Substrate **1** was prepared according to literature.<sup>4</sup>

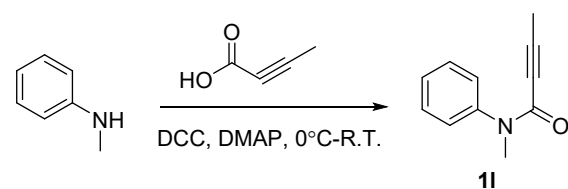

Substrate **1r-1t** were prepared according to literature.<sup>5</sup>

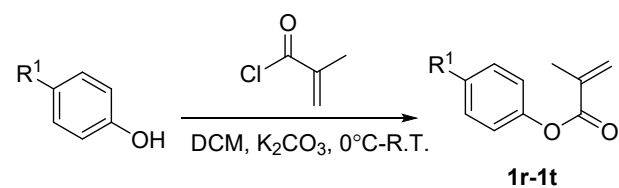

Substrate **2m-2p** were prepared according to literature.<sup>6</sup>

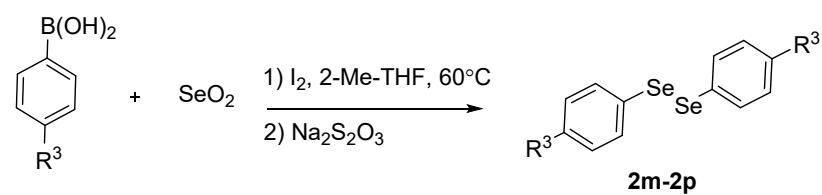

### 3. Chemical structures of the substrates 1 and 2

Table 1. Chemical structures of 1

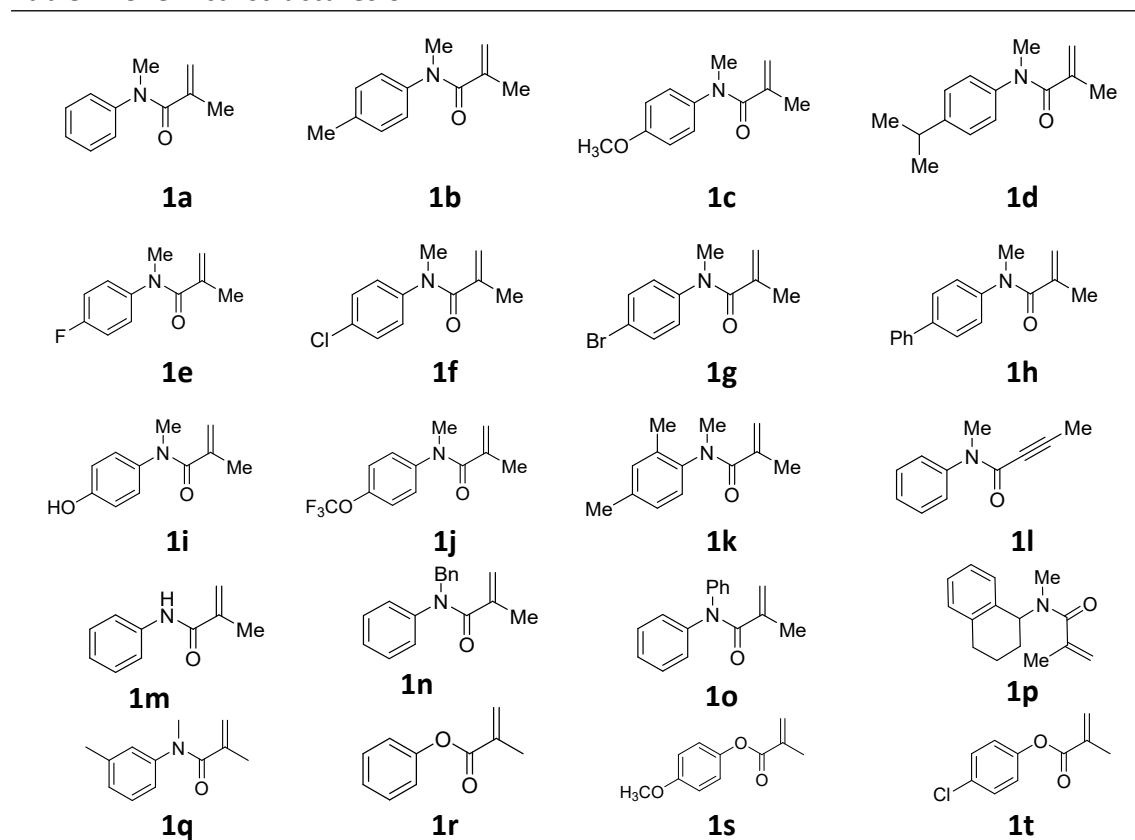

Table 2. Chemical structures of 2

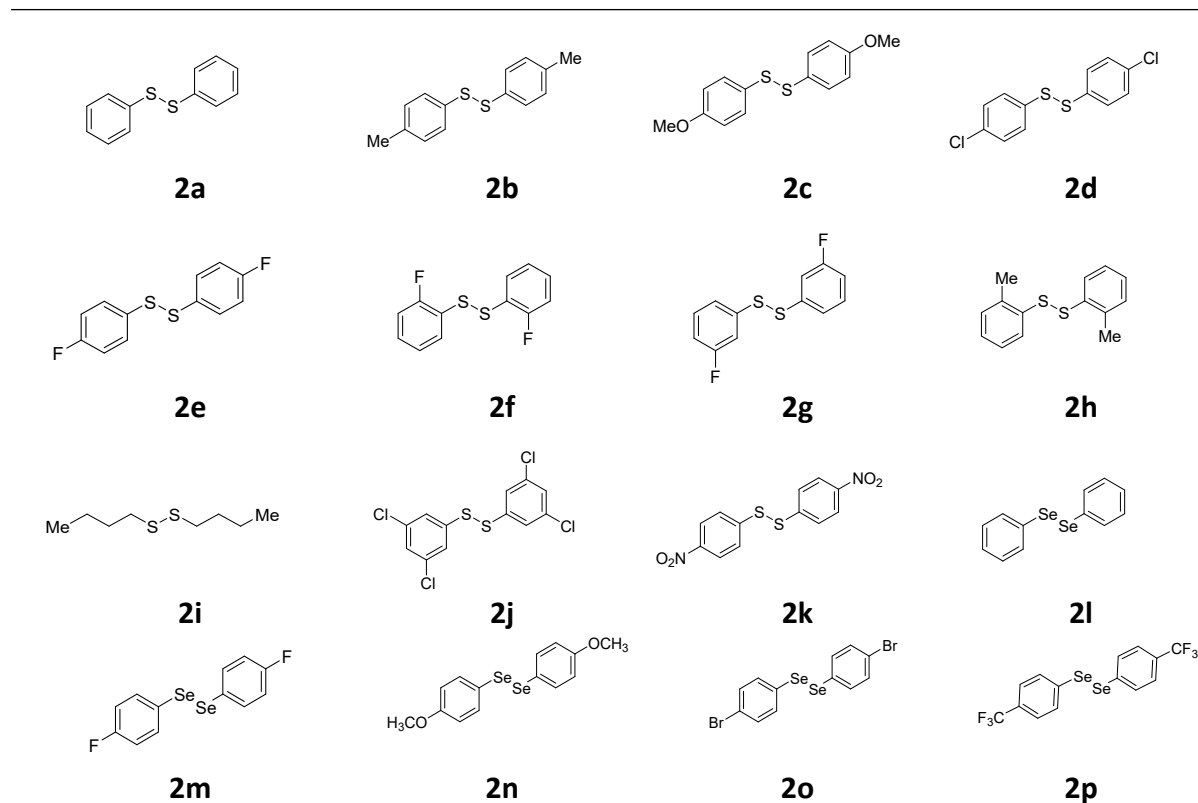

#### 4. The Optimization Reaction Conditions

Table 3. Optimization of the reaction conditions.<sup>a</sup>

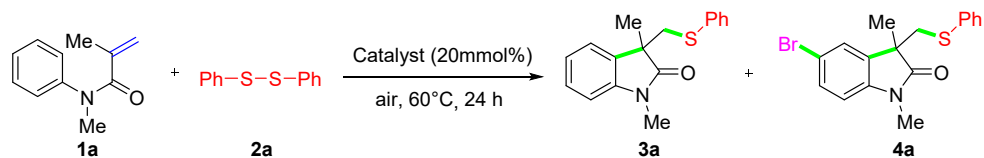

| Entry           | Catalyst                    | Oxidant                                                       | Solvent     | Yield(%) <sup>b</sup> |       |
|-----------------|-----------------------------|---------------------------------------------------------------|-------------|-----------------------|-------|
|                 |                             |                                                               |             | 3a                    | 4a    |
| 1               | FeBr <sub>3</sub>           | -                                                             | MeCN        | trace                 | trace |
| 2               | FeBr <sub>3</sub>           | (NH <sub>4</sub> ) <sub>2</sub> S <sub>2</sub> O <sub>8</sub> | MeCN        | 51                    | 15    |
| 3               | FeCl <sub>3</sub>           | (NH <sub>4</sub> ) <sub>2</sub> S <sub>2</sub> O <sub>8</sub> | MeCN        | NR <sup>c</sup>       | NR    |
| 4               | FeCl <sub>2</sub>           | (NH <sub>4</sub> ) <sub>2</sub> S <sub>2</sub> O <sub>8</sub> | MeCN        | NR                    | NR    |
| 5               | Fe(OAc) <sub>3</sub>        | (NH <sub>4</sub> ) <sub>2</sub> S <sub>2</sub> O <sub>8</sub> | MeCN        | NR                    | NR    |
| 6               | CuBr <sub>2</sub>           | (NH <sub>4</sub> ) <sub>2</sub> S <sub>2</sub> O <sub>8</sub> | MeCN        | 40                    | 12    |
| 7               | CuBr                        | (NH <sub>4</sub> ) <sub>2</sub> S <sub>2</sub> O <sub>8</sub> | MeCN        | 32                    | trace |
| 8               |                             | (NH <sub>4</sub> ) <sub>2</sub> S <sub>2</sub> O <sub>8</sub> | MeCN        | NR                    | NR    |
| 9               |                             | (NH <sub>4</sub> ) <sub>2</sub> S <sub>2</sub> O <sub>8</sub> | MeCN        | 41                    | trace |
| 10              | CuI                         | (NH <sub>4</sub> ) <sub>2</sub> S <sub>2</sub> O <sub>8</sub> | MeCN        | trace                 | trace |
| 11              | CuCl <sub>2</sub>           | (NH <sub>4</sub> ) <sub>2</sub> S <sub>2</sub> O <sub>8</sub> | MeCN        | trace                 | trace |
| 12              | CoCl <sub>2</sub>           | (NH <sub>4</sub> ) <sub>2</sub> S <sub>2</sub> O <sub>8</sub> | MeCN        | 22                    | trace |
| 13              | NiBr <sub>2</sub>           | (NH <sub>4</sub> ) <sub>2</sub> S <sub>2</sub> O <sub>8</sub> | MeCN        | 66                    | trace |
| 14              | CoBr <sub>2</sub>           | (NH <sub>4</sub> ) <sub>2</sub> S <sub>2</sub> O <sub>8</sub> | MeCN        | NR                    | trace |
| 15              | Co(OAc) <sub>2</sub>        | Na <sub>2</sub> S <sub>2</sub> O <sub>8</sub>                 | MeCN        | 23                    | 12    |
| 16              | KBr                         | K <sub>2</sub> S <sub>2</sub> O <sub>8</sub>                  | MeCN        | 47                    | NR    |
|                 | CoBr <sub>2</sub>           |                                                               |             | 54                    | trace |
|                 | CoBr <sub>2</sub>           |                                                               |             |                       | trace |
|                 |                             |                                                               |             |                       | 18    |
|                 |                             |                                                               |             |                       | 16    |
| 17              | CoBr <sub>2</sub>           | (NH <sub>4</sub> ) <sub>2</sub> S <sub>2</sub> O <sub>8</sub> | MeOH        | trace                 | trace |
|                 |                             |                                                               |             | trace                 | trace |
| 18              | CoBr <sub>2</sub>           | (NH <sub>4</sub> ) <sub>2</sub> S <sub>2</sub> O <sub>8</sub> | 1,4-dioxane | trace                 | trace |
|                 |                             |                                                               |             | trace                 | trace |
| 19              | CoBr <sub>2</sub>           | (NH <sub>4</sub> ) <sub>2</sub> S <sub>2</sub> O <sub>8</sub> | DCE         | 12                    | trace |
|                 |                             |                                                               |             |                       | trace |
| 20              | CoBr <sub>2</sub>           | (NH <sub>4</sub> ) <sub>2</sub> S <sub>2</sub> O <sub>8</sub> | DMF         | trace                 | trace |
|                 |                             |                                                               |             | trace                 | trace |
| 21              | CoBr <sub>2</sub>           | (NH <sub>4</sub> ) <sub>2</sub> S <sub>2</sub> O <sub>8</sub> | toluene     | trace                 | trace |
|                 |                             |                                                               |             | trace                 | trace |
| 22 <sup>d</sup> | CoBr <sub>2</sub>           | (NH <sub>4</sub> ) <sub>2</sub> S <sub>2</sub> O <sub>8</sub> | MeCN        | 69                    | 14    |
| 23 <sup>e</sup> | CoBr <sub>2</sub>           | (NH <sub>4</sub> ) <sub>2</sub> S <sub>2</sub> O <sub>8</sub> | MeCN        | 73                    | 19    |
| 24 <sup>e</sup> | CoBr <sub>2</sub> (10mmol%) | (NH <sub>4</sub> ) <sub>2</sub> S <sub>2</sub> O <sub>8</sub> | MeCN        | 42                    | 5     |

|                   |                             |                                                                          |      |      |    |
|-------------------|-----------------------------|--------------------------------------------------------------------------|------|------|----|
| 25 <sup>e</sup>   | CoBr <sub>2</sub> (30mmol%) | (NH <sub>4</sub> ) <sub>2</sub> S <sub>2</sub> O <sub>8</sub>            | MeCN | 58   | 29 |
| 26 <sup>e</sup>   | CoBr <sub>2</sub>           | (NH <sub>4</sub> ) <sub>2</sub> S <sub>2</sub> O <sub>8</sub> (0.36mmol) | MeCN | 85   | 10 |
| 27 <sup>e</sup>   | CoBr <sub>2</sub>           | (NH <sub>4</sub> ) <sub>2</sub> S <sub>2</sub> O <sub>8</sub> (0.42mmol) | MeCN | 76   | 16 |
| 28 <sup>e,f</sup> | CoBr <sub>2</sub>           | (NH <sub>4</sub> ) <sub>2</sub> S <sub>2</sub> O <sub>8</sub> (0.36mmol) | MeCN | 59   | 11 |
| 29 <sup>d</sup>   | CoBr <sub>2</sub> (50mmol%) | (NH <sub>4</sub> ) <sub>2</sub> S <sub>2</sub> O <sub>8</sub> (0.6mmol)  | MeCN | trac | 83 |
|                   |                             |                                                                          |      | e    |    |

<sup>a</sup> Reaction conditions: **1a** (0.30 mmol), **2a** (0.15 mmol), catalyst (20 mmol%), oxidant (0.30 mmol), solvent (1.0 mL), 60 °C, air, 24 h (an oil bath). <sup>b</sup> Isolated yield based on **1a**. <sup>c</sup> NR means no reaction. <sup>d</sup> The reaction was performed at 80 °C, 12 h (an oil bath). <sup>e</sup> The reaction was performed at 100 °C (an oil bath), 8h. <sup>f</sup> The reaction was performed under an Ar atmosphere.

## 5. Substrate scope of *N*-arylacrylamides bearing electron-withdrawing groups.

Several *N*-arylacrylamides bearing electron-withdrawing groups attached to the *ortho* and *meta*-positions of aryl ring have been investigated to evaluate the effects of electrotopy and steric hindrance on the reaction. Unfortunately, traces of sulfurated products were noticed when the strong electron-withdrawing group (CN, NO<sub>2</sub>) substituted *N*-arylacrylamides were performed, and the potential causes are still being investigated in our lab (Scheme 1).

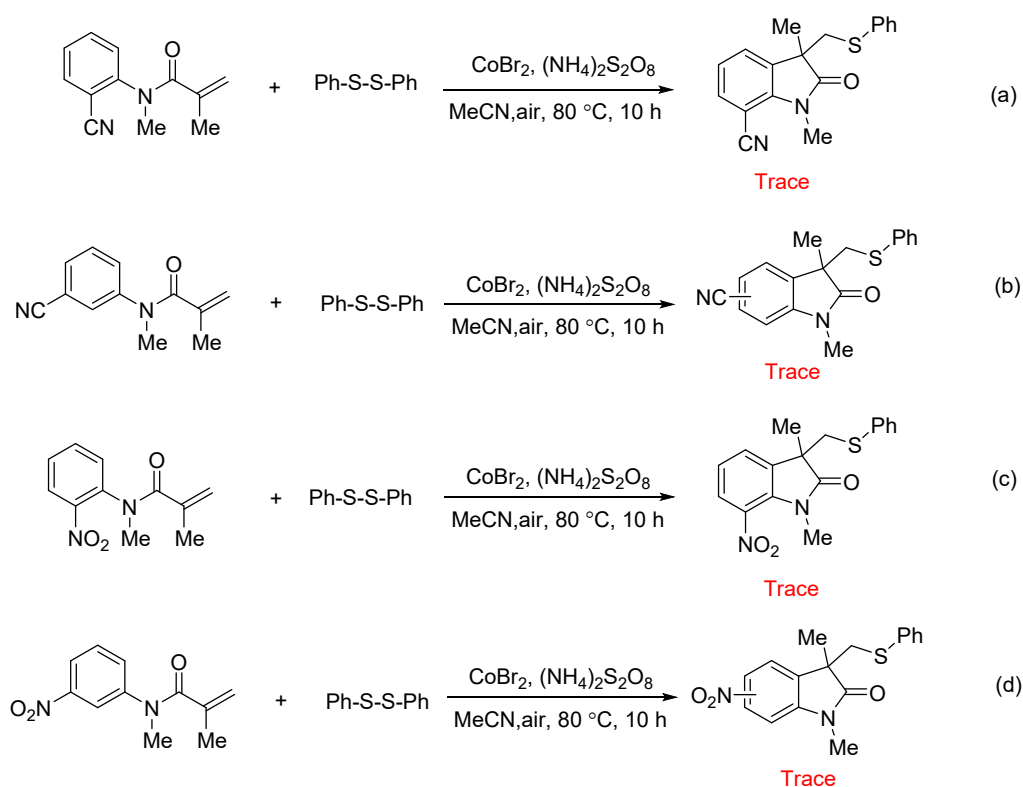

Scheme 1. Reactivity of *N*-arylacrylamides with electron-withdrawing substituents.



## 6. General procedure for the cobalt-catalyzed synthesis of sulfurated oxindoles.

A reaction flask (10.0 mL) was charged with *N*-arylacrylamide (0.3 mmol), disulphide (0.15 mmol),  $\text{CoBr}_2$  (0.06 mmol) and  $(\text{NH}_4)_2\text{S}_2\text{O}_8$  (0.36 mmol) in MeCN (1.0 mL). The resulting reaction mixture was heated at 80-100 °C in an oil bath for 10-12 h. The progress of the reaction was monitored by TLC. After completion, the reaction mixture was cooled to room temperature and removed the solvent under reduced pressure. The crude product was purified *via* flash column chromatography (PE/EA = 4:1 to 1:1) to give the corresponding substituted sulfurated oxindole.

**1,3-Dimethyl-3-((phenylthio)methyl)indolin-2-one (3a)**<sup>7</sup>: colourless oil; 72 mg, yield: 85%; <sup>1</sup>H NMR (400 MHz,  $\text{CDCl}_3$ )  $\delta$  7.30-7.27 (m, 1H), 7.22-7.09 (m, 6H), 7.00-6.96 (m, 1H), 6.85 (d,  $J = 7.8$  Hz, 1H), 3.44-3.34 (m, 2H), 3.21 (s, 3H), 1.44 (s, 3H); <sup>13</sup>C NMR (100 MHz,  $\text{CDCl}_3$ )  $\delta$  179.1, 143.4, 136.2, 132.3, 130.5, 128.7, 128.3, 126.5, 123.3, 122.5, 108.0, 49.0, 42.8, 26.3, 23.0. HRMS (ESI)  $m/z$ : calcd for  $\text{C}_{17}\text{H}_{18}\text{NOS}$  [ $\text{M} + \text{H}$ ]<sup>+</sup> 284.1109; Found 284.1104.

**1,3-Dimethyl-3-((*p*-tolylthio)methyl)indolin-2-one (3b)**<sup>7</sup>: colourless oil; 78 mg, yield: 87%; <sup>1</sup>H NMR (400 MHz,  $\text{CDCl}_3$ )  $\delta$  7.30-7.28 (m, 1H), 7.19 (d,  $J = 7.4$  Hz, 1H), 7.10 (d,  $J = 8.2$  Hz, 2H), 7.03-6.94 (m, 3H), 6.85 (d,  $J = 7.7$  Hz, 1H), 3.40-3.30 (m, 2H), 3.21 (s, 3H), 2.27 (s, 3H), 1.43 (s, 3H); <sup>13</sup>C NMR (100 MHz,  $\text{CDCl}_3$ )  $\delta$  179.1, 143.4, 136.6, 132.5, 132.4, 131.2, 129.5, 128.2, 123.3, 122.5, 108.0, 49.1, 43.5, 26.3, 23.0, 21.0. HRMS (ESI)  $m/z$ : calcd for  $\text{C}_{18}\text{H}_{20}\text{NOS}$  [ $\text{M} + \text{H}$ ]<sup>+</sup> 298.1266; Found 298.1264.

**3-(((4-Methoxyphenyl)thio)methyl)-1,3-dimethylindolin-2-one (3c)**<sup>7</sup>: colourless oil; 85 mg, yield: 90%; <sup>1</sup>H NMR (600 MHz,  $\text{CDCl}_3$ )  $\delta$  7.28 (t,  $J = 7.7$  Hz, 1H), 7.14 (dd,  $J = 15.4, 8.0$  Hz, 3H), 6.99 (t,  $J = 7.5$  Hz, 1H), 6.86 (d,  $J = 7.7$  Hz, 1H), 6.71 (d,  $J = 8.7$  Hz, 2H), 3.76 (s, 3H), 3.31 (d,  $J = 1.1$  Hz, 2H), 3.21 (s, 3H), 1.41 (s, 3H); <sup>13</sup>C NMR (150 MHz,  $\text{CDCl}_3$ )  $\delta$  179.1, 159.0, 143.5, 133.9, 132.4, 128.2, 126.5, 123.3, 122.5, 114.3, 108.0, 55.3, 49.3, 44.6, 26.3, 23.2. HRMS (ESI)  $m/z$ : calcd for  $\text{C}_{18}\text{H}_{20}\text{NO}_2\text{S}$  [ $\text{M} + \text{H}$ ]<sup>+</sup> 314.1215; Found 314.1217.

**3-(((4-Chlorophenyl)thio)methyl)-1,3-dimethylindolin-2-one (3d)**<sup>7</sup>: colourless oil; 74 mg, yield: 78%; <sup>1</sup>H NMR (600 MHz,  $\text{CDCl}_3$ )  $\delta$  7.28 (td,  $J = 7.7, 1.2$  Hz, 1H), 7.16-7.07 (m, 5H), 7.01-6.93 (m, 1H), 6.85 (d,  $J = 7.8$  Hz, 1H), 3.39-3.34 (m, 2H), 3.21 (s, 3H), 1.43 (s, 3H); <sup>13</sup>C NMR (150 MHz,  $\text{CDCl}_3$ )  $\delta$  178.9, 143.5, 134.6, 132.6, 132.1, 132.0, 128.8, 128.4, 123.3, 122.6, 108.1, 49.1, 43.0, 26.3, 23.1. HRMS (ESI)  $m/z$ : calcd for  $\text{C}_{17}\text{H}_{18}\text{ClNOS}$  [ $\text{M} + \text{H}$ ]<sup>+</sup> 318.0719; Found 318.0714.

**1,3-Dimethyl-3-(((4-nitrophenyl)thio)methyl)indolin-2-one (3e)**: yellow oil; 39 mg, yield: 40%; <sup>1</sup>H NMR (600 MHz,  $\text{CDCl}_3$ )  $\delta$  8.04 (d,  $J = 8.9$  Hz, 2H), 7.38 (dd,  $J = 8.3, 2.0$  Hz, 1H), 7.29-7.22 (m, 3H), 7.18 (d,  $J = 1.9$  Hz, 1H), 6.74 (d,  $J = 8.3$  Hz, 1H), 3.46 (s, 2H), 3.21 (s, 3H), 1.48 (s, 3H); <sup>13</sup>C NMR (150 MHz,  $\text{CDCl}_3$ )  $\delta$  178.0, 145.8, 145.7, 142.5, 133.5, 131.5, 128.5, 126.7, 123.8, 115.4, 109.7, 49.2, 41.0, 26.5, 22.9. HRMS (ESI)  $m/z$ : calcd for  $\text{C}_{17}\text{H}_{18}\text{N}_2\text{O}_3\text{S}$  [ $\text{M} + \text{H}$ ]<sup>+</sup> 329.0960; Found 329.0958.

**3-Methyl-3-((phenylthio)methyl)indolin-2-one (3f)**: colourless oil; 61 mg, yield: 76%; <sup>1</sup>H NMR (600 MHz,  $\text{CDCl}_3$ )  $\delta$  8.58 (s, 1H), 7.49 (d,  $J = 8.7$  Hz, 2H), 7.42 (d,  $J = 7.8$  Hz, 2H), 7.36-7.32 (m, 2H), 7.24 (t,  $J = 7.5$  Hz, 1H), 7.20-7.14 (m, 2H), 3.75 (d,  $J = 13.9$  Hz, 1H), 3.57 (d,  $J = 13.9$  Hz, 1H), 1.93 (s, 3H); <sup>13</sup>C NMR (150 MHz,  $\text{CDCl}_3$ )  $\delta$  168.1, 136.9, 135.6,

130.9, 129.0, 129.0, 127.0, 125.1, 120.2, 73.5, 47.7, 29.3. HRMS (ESI) m/z: calcd for C<sub>16</sub>H<sub>16</sub>NOS [M + H]<sup>+</sup> 270.0953; Found 270.0948.

**1-Benzyl-3-methyl-3-((phenylthio)methyl)indolin-2-one (3g):** colourless oil; 86 mg, yield: 80%; <sup>1</sup>H NMR (600 MHz, CDCl<sub>3</sub>) δ 7.36 (d, *J* = 7.2 Hz, 2H), 7.31-7.28 (m, 2H), 7.27-7.23 (m, 2H), 7.21-7.17 (m, 2H), 7.17-7.08 (m, 5H), 6.90 (td, *J* = 7.5, 1.0 Hz, 1H), 6.70 (d, *J* = 7.8 Hz, 1H), 5.05 (d, *J* = 15.8 Hz, 1H), 4.82 (d, *J* = 15.8 Hz, 1H), 3.50 (d, *J* = 12.7 Hz, 1H), 3.45 (d, *J* = 12.7 Hz, 1H), 1.50 (s, 3H); <sup>13</sup>C NMR (150 MHz, CDCl<sub>3</sub>) δ 179.2, 142.5, 136.3, 135.8, 132.2, 130.5, 128.7, 128.7, 128.1, 127.6, 127.3, 126.4, 123.3, 122.5, 109.2, 49.2, 43.9, 42.8, 23.5. HRMS (ESI) m/z: calcd for C<sub>23</sub>H<sub>21</sub>NOS [M + H]<sup>+</sup> 360.1422; Found 360.1425.

**1,3,5-Trimethyl-3-((phenylthio)methyl)indolin-2-one (3h):** colourless oil; 77 mg, yield: 86%; <sup>1</sup>H NMR (600 MHz, CDCl<sub>3</sub>) δ 7.20-7.09 (m, 5H), 7.05 (d, *J* = 7.9 Hz, 1H), 6.91 (s, 1H), 6.73 (d, *J* = 7.9 Hz, 1H), 3.40-3.35 (m, 2H), 3.20 (s, 3H), 2.24 (s, 3H), 1.42 (s, 3H); <sup>13</sup>C NMR (150 MHz, CDCl<sub>3</sub>) δ 179.0, 141.1, 136.2, 132.2, 132.0, 130.6, 128.6, 128.5, 126.4, 124.3, 107.7, 49.2, 42.9, 26.3, 23.1, 21.1. HRMS (ESI) m/z: calcd for C<sub>18</sub>H<sub>20</sub>NOS [M + H]<sup>+</sup> 298.1266; Found 298.1261.

**5-Methoxy-1,3-dimethyl-3-((phenylthio)methyl)indolin-2-one (3i):** colourless oil; 85 mg, yield: 90%; <sup>1</sup>H NMR (600 MHz, CDCl<sub>3</sub>) δ 7.20-7.14 (m, 4H), 7.14-7.11 (m, 1H), 6.81-6.73 (m, 3H), 3.71 (s, 3H), 3.41-3.33 (m, 2H), 3.19 (s, 3H), 1.43 (s, 3H); <sup>13</sup>C NMR (150 MHz, CDCl<sub>3</sub>) δ 178.7, 156.0, 137.0, 136.2, 133.6, 130.7, 128.7, 126.5, 112.6, 110.8, 108.3, 55.7, 49.6, 42.8, 26.4, 23.1. HRMS (ESI) m/z: calcd for C<sub>18</sub>H<sub>20</sub>NO<sub>2</sub>S [M + H]<sup>+</sup> 314.1215; Found 314.1215.

**5-Isopropyl-1,3-dimethyl-3-((phenylthio)methyl)indolin-2-one (3j):** colourless oil; 89 mg, yield: 91%; <sup>1</sup>H NMR (600 MHz, CDCl<sub>3</sub>) δ 7.21-7.07 (m, 6H), 7.06 (d, *J* = 1.7 Hz, 1H), 6.77 (d, *J* = 8.0 Hz, 1H), 3.40 (d, *J* = 12.9 Hz, 1H), 3.35 (d, *J* = 12.9 Hz, 1H), 3.20 (s, 3H), 2.81 (hept, *J* = 6.9 Hz, 1H), 1.44 (s, 3H), 1.19 (dd, *J* = 12.3, 6.9 Hz, 6H); <sup>13</sup>C NMR (151 MHz, CDCl<sub>3</sub>) δ 179.1, 143.3, 141.3, 136.4, 132.3, 130.4, 128.7, 126.4, 125.8, 121.7, 107.7, 49.2, 42.9, 33.8, 26.3, 24.2, 24.2, 22.9. HRMS (ESI) m/z: calcd for C<sub>20</sub>H<sub>24</sub>NOS [M + H]<sup>+</sup> 326.1579; Found 326.1575.

**5-Fluoro-1,3-dimethyl-3-((phenylthio)methyl)indolin-2-one (3k):** colourless oil; 74 mg, yield: 82%; <sup>1</sup>H NMR (600 MHz, CDCl<sub>3</sub>) δ 7.21-7.11 (m, 5H), 6.98-6.92 (m, 1H), 6.87 (dd, *J* = 8.0, 2.6 Hz, 1H), 6.75 (dd, *J* = 8.5, 4.1 Hz, 1H), 3.41-3.33 (m, 2H), 3.20 (s, 3H), 1.42 (s, 3H); <sup>13</sup>C NMR (150 MHz, CDCl<sub>3</sub>) δ 178.7, 159.2 (d, *J* = 240.9 Hz), 139.4, 135.8, 133.9 (d, *J* = 7.7 Hz), 130.8, 128.8, 126.8, 114.4 (d, *J* = 23.0 Hz), 111.7 (d, *J* = 25.0 Hz), 108.4 (d, *J* = 8.6 Hz), 49.7, 42.7, 26.4, 23.0; <sup>19</sup>F NMR (565 MHz, CDCl<sub>3</sub>) δ -115.2. HRMS (ESI) m/z: calcd for C<sub>17</sub>H<sub>17</sub>FNOS [M + H]<sup>+</sup> 302.1015; Found 302.1017.

**5-Chloro-1,3-dimethyl-3-((phenylthio)methyl)indolin-2-one (3l)<sup>8</sup>:** colourless oil; 78 mg, yield: 82%; <sup>1</sup>H NMR (600 MHz, CDCl<sub>3</sub>) δ 7.21 (dd, *J* = 8.3, 2.1 Hz, 1H), 7.17 (m, 5H), 7.05 (d, *J* = 2.1 Hz, 1H), 6.76 (d, *J* = 8.2 Hz, 1H), 3.36 (s, 2H), 3.20 (s, 3H), 1.42 (s, 3H); <sup>13</sup>C NMR (150 MHz, CDCl<sub>3</sub>) δ 178.6, 142.1, 135.6, 133.9, 130.9, 128.8, 128.2, 127.9, 126.9, 124.0, 108.9, 49.6, 42.7, 26.4, 23.0. HRMS (ESI) m/z: calcd for C<sub>17</sub>H<sub>17</sub>ClNOS [M + H]<sup>+</sup> 318.0719; Found 318.0719.

**5-Bromo-1,3-dimethyl-3-((phenylthio)methyl)indolin-2-one (3m):** colourless oil; 87 mg, yield: 80%; <sup>1</sup>H NMR (400 MHz, CDCl<sub>3</sub>) δ 7.36 (dd, *J* = 8.2, 2.0 Hz, 1H), 7.17 (dd, *J* =

3.5, 1.5 Hz, 6H), 6.71 (d,  $J = 8.3$  Hz, 1H), 3.36 (s, 2H), 3.19 (s, 3H), 1.41 (s, 3H);  $^{13}\text{C}$  NMR (100 MHz,  $\text{CDCl}_3$ )  $\delta$  178.5, 142.6, 135.6, 134.2, 131.1, 130.9, 128.8, 126.9, 126.8, 115.2, 109.4, 49.6, 42.8, 26.4, 23.0. HRMS (ESI)  $m/z$ : calcd for  $\text{C}_{17}\text{H}_{17}\text{BrNOS}$  [ $\text{M} + \text{H}$ ] $^+$  362.0214; Found 362.0212.

**1,3-Dimethyl-5-phenyl-3-((phenylthio)methyl)indolin-2-one (3n)**: colourless oil; 97 mg, yield: 90%;  $^1\text{H}$  NMR (600 MHz,  $\text{CDCl}_3$ )  $\delta$  7.49 (dd,  $J = 8.0, 1.8$  Hz, 1H), 7.46-7.38 (m, 4H), 7.34 (d,  $J = 1.8$  Hz, 1H), 7.32 (t,  $J = 7.0$  Hz, 1H), 7.19 (d,  $J = 7.0$  Hz, 2H), 7.13 (t,  $J = 7.7$  Hz, 2H), 7.07 (t,  $J = 7.3$  Hz, 1H), 6.92 (d,  $J = 8.1$  Hz, 1H), 3.46-3.40 (m, 2H), 3.27 (s, 3H), 1.49 (s, 3H);  $^{13}\text{C}$  NMR (150 MHz,  $\text{CDCl}_3$ )  $\delta$  179.1, 142.9, 140.9, 136.0, 136.0, 132.8, 130.7, 128.7, 128.7, 127.1, 126.9, 126.9, 126.6, 122.5, 108.2, 49.5, 42.9, 26.4, 23.1. HRMS (ESI)  $m/z$ : calcd for  $\text{C}_{23}\text{H}_{22}\text{NOS}$  [ $\text{M} + \text{H}$ ] $^+$  360.1422; Found 360.1425.

**5-Hydroxy-1,3-dimethyl-3-((phenylthio)methyl)indolin-2-one (3o)**: pink solid; 63 mg, yield: 70%; mp: 52-53  $^\circ\text{C}$ ;  $^1\text{H}$  NMR (600 MHz,  $\text{DMSO-d}_6$ )  $\delta$  9.05 (s, 1H), 7.23 (dt,  $J = 15.1, 7.3$  Hz, 4H), 7.15 (t,  $J = 7.0$  Hz, 1H), 6.83-6.79 (m, 2H), 6.67 (dd,  $J = 8.3, 2.5$  Hz, 1H), 3.52 (d,  $J = 12.3$  Hz, 1H), 3.26 (d,  $J = 12.3$  Hz, 1H), 3.06 (s, 3H), 1.32 (s, 3H);  $^{13}\text{C}$  NMR (150 MHz,  $\text{DMSO-d}_6$ )  $\delta$  178.0, 153.7, 136.7, 135.7, 133.5, 129.3, 129.2, 126.4, 114.4, 111.9, 109.2, 48.9, 41.0, 26.5, 23.8. HRMS (ESI)  $m/z$ : calcd for  $\text{C}_{17}\text{H}_{18}\text{NO}_2\text{S}$  [ $\text{M} + \text{H}$ ] $^+$  300.1058; Found 300.1057.

**1,3-Dimethyl-3-((phenylthio)methyl)-5-(trifluoromethyl)indolin-2-one (3p)**: colourless oil; 83 mg, yield: 75%;  $^1\text{H}$  NMR (400 MHz,  $\text{CDCl}_3$ )  $\delta$  7.22-7.09 (m, 6H), 7.04 (d,  $J = 1.3$  Hz, 1H), 6.82 (d,  $J = 8.5$  Hz, 1H), 3.37 (d,  $J = 1.7$  Hz, 2H), 3.21 (s, 3H), 1.44 (s, 3H);  $^{13}\text{C}$  NMR (100 MHz,  $\text{CDCl}_3$ )  $\delta$  178.8, 144.7, 142.1, 135.6, 133.8, 130.8, 128.8, 126.9, 121.3, 117.5, 108.3, 49.6, 42.7, 26.4, 22.9;  $^{19}\text{F}$  NMR (565 MHz,  $\text{CDCl}_3$ )  $\delta$  -58.3. HRMS (ESI)  $m/z$ : calcd for  $\text{C}_{18}\text{H}_{17}\text{F}_3\text{NO}_2\text{S}$  [ $\text{M} + \text{H}$ ] $^+$  368.0932; Found 368.0931.

**1,3,4-Trimethyl-3-((phenylthio)methyl)indolin-2-one /1,3,6-trimethyl-3-((phenylthio)methyl)indolin-2-one (1.5:1) (3q:3q')**: colourless oil; 64 mg, yield: 72%;  $^1\text{H}$  NMR (400 MHz,  $\text{CDCl}_3$ )  $\delta$  7.50 (d,  $J = 8.0$  Hz, 1H), 7.30 (s, 1H), 7.24-7.19 (m, 3H), 7.18 (dd,  $J = 2.0, 1.3$  Hz, 2H), 7.17 (d,  $J = 1.0$  Hz, 1H), 7.16 (d,  $J = 0.8$  Hz, 1H), 7.15 (d,  $J = 1.1$  Hz, 1H), 7.13-7.10 (m, 2H), 7.03 (tt,  $J = 6.8, 1.2$  Hz, 3H), 6.80 (s, 1H), 6.74 (d,  $J = 7.8$  Hz, 1H), 3.58-3.50 (m, 1H), 3.36 (d,  $J = 1.8$  Hz, 2H), 3.21 (s, 3H), 3.17 (s, 2H), 2.41 (s, 3H), 2.22 (s, 2H), 1.62 (s, 3H), 1.50 (s, 2H);  $^{13}\text{C}$  NMR (100 MHz,  $\text{CDCl}_3$ )  $\delta$  179.1, 144.9, 144.5, 143.0, 138.9, 138.3, 138.1, 136.5, 135.9, 135.1, 131.5, 130.9, 130.7, 130.6, 129.0, 128.9, 128.7, 128.6, 127.0, 126.9, 126.6, 125.3, 125.3, 110.5, 106.7, 50.6, 49.1, 42.9, 41.3, 26.4, 26.3, 23.0, 22.2, 21.4. HRMS (ESI)  $m/z$ : calcd for  $\text{C}_{18}\text{H}_{20}\text{NOS}$  [ $\text{M} + \text{H}$ ] $^+$  298.1266; Found 298.1264.

**1,3,5,7-Tetramethyl-3-((phenylthio)methyl)indolin-2-one (3r)**: colourless oil; 78 mg, yield: 84%;  $^1\text{H}$  NMR (600 MHz,  $\text{CDCl}_3$ )  $\delta$  7.22-7.15 (m, 4H), 7.14-7.09 (m, 1H), 6.77 (d,  $J = 11.0$  Hz, 2H), 3.47 (s, 3H), 3.35 (s, 2H), 2.54 (s, 3H), 2.19 (s, 3H), 1.40 (s, 3H);  $^{13}\text{C}$  NMR (151 MHz,  $\text{CDCl}_3$ )  $\delta$  179.7, 138.8, 136.3, 133.0, 132.4, 131.8, 130.6, 128.6, 126.4, 122.0, 119.3, 48.5, 43.1, 29.6, 23.5, 20.8, 18.9. HRMS (ESI)  $m/z$ : calcd for  $\text{C}_{19}\text{H}_{22}\text{NOS}$  [ $\text{M} + \text{H}$ ] $^+$  312.1422; Found 312.1425.

**1,3,5-Trimethyl-3-((p-tolylthio)methyl)indolin-2-one (3s)**<sup>7</sup>: colourless oil; 78 mg, yield: 84%;  $^1\text{H}$  NMR (600 MHz,  $\text{CDCl}_3$ )  $\delta$  7.09-7.02 (m, 3H), 6.96 (d,  $J = 7.9$  Hz, 2H), 6.89

(s, 1H), 6.73 (d,  $J = 7.8$  Hz, 1H), 3.36-3.30 (m, 2H), 3.20 (s, 3H), 2.27 (s, 3H), 2.23 (s, 3H), 1.40 (s, 3H);  $^{13}\text{C}$  NMR (150 MHz,  $\text{CDCl}_3$ )  $\delta$  179.1, 141.1, 136.5, 132.5, 132.3, 131.9, 131.3, 129.4, 128.4, 124.3, 107.7, 49.3, 43.5, 26.3, 23.1, 21.1, 21.0. HRMS (ESI)  $m/z$ : calcd for  $\text{C}_{19}\text{H}_{22}\text{NOS}$  [ $\text{M} + \text{H}$ ] $^+$  312.1422; Found 312.1425.

**3-(((4-Methoxyphenyl)thio)methyl)-1,3,5-trimethylindolin-2-one (3t)**: colourless oil; 84 mg, yield: 86%;  $^1\text{H}$  NMR (400 MHz,  $\text{CDCl}_3$ )  $\delta$  7.13-7.06 (m, 2H), 7.04 (d,  $J = 7.0$  Hz, 1H), 6.86 (s, 1H), 6.74 (d,  $J = 7.9$  Hz, 1H), 6.71-6.65 (m, 2H), 3.76 (s, 3H), 3.29 (s, 2H), 3.20 (s, 3H), 2.24 (s, 3H), 1.38 (s, 3H);  $^{13}\text{C}$  NMR (100 MHz,  $\text{CDCl}_3$ )  $\delta$  179.1, 158.9, 141.2, 133.9, 132.3, 131.9, 128.4, 126.6, 124.2, 114.2, 107.7, 55.3, 49.5, 44.5, 26.3, 23.3, 21.1. HRMS (ESI)  $m/z$ : calcd for  $\text{C}_{19}\text{H}_{22}\text{NO}_2\text{S}$  [ $\text{M} + \text{H}$ ] $^+$  328.1371; Found 328.1376.

**3-(((4-Chlorophenyl)thio)methyl)-1,3,5-trimethylindolin-2-one (3u)**: colourless oil; 79 mg, yield: 80%;  $^1\text{H}$  NMR (400 MHz,  $\text{CDCl}_3$ )  $\delta$  7.15-7.01 (m, 5H), 6.83 (s, 1H), 6.73 (d,  $J = 7.9$  Hz, 1H), 3.34 (s, 2H), 3.20 (s, 3H), 2.23 (s, 3H), 1.40 (s, 3H);  $^{13}\text{C}$  NMR (100 MHz,  $\text{CDCl}_3$ )  $\delta$  178.9, 141.1, 134.6, 132.5, 132.2, 132.1, 132.0, 128.7, 128.5, 124.2, 107.8, 49.4, 43.2, 26.3, 23.2, 21.0. HRMS (ESI)  $m/z$ : calcd for  $\text{C}_{18}\text{H}_{19}\text{ClNOS}$  [ $\text{M} + \text{H}$ ] $^+$  332.0876; Found 332.0878.

**3-(((4-Fluorophenyl)thio)methyl)-1,3,5-trimethylindolin-2-one (3v)**: colourless oil; 82 mg, yield: 87%;  $^1\text{H}$  NMR (600 MHz,  $\text{CDCl}_3$ )  $\delta$  7.15-7.08 (m, 2H), 7.05 (d,  $J = 8.0$  Hz, 1H), 6.88-6.80 (m, 3H), 6.74 (d,  $J = 7.9$  Hz, 1H), 3.33 (d,  $J = 2.1$  Hz, 2H), 3.21 (s, 3H), 2.24 (s, 3H), 1.40 (s, 3H);  $^{13}\text{C}$  NMR (150 MHz,  $\text{CDCl}_3$ )  $\delta$  179.0, 161.9 (d,  $J = 247.3$  Hz), 141.2, 133.6 (d,  $J = 7.7$  Hz), 132.1, 132.0, 131.1 (d,  $J = 4.0$  Hz), 128.5, 124.2, 115.6 (d,  $J = 21.8$  Hz), 107.8, 49.5, 44.0, 26.3, 23.2, 21.0;  $^{19}\text{F}$  NMR (565 MHz,  $\text{CDCl}_3$ )  $\delta$  -115.2. HRMS (ESI)  $m/z$ : calcd for  $\text{C}_{18}\text{H}_{19}\text{FNOS}$  [ $\text{M} + \text{H}$ ] $^+$  316.1171; Found 316.1170.

**3-(((2-Fluorophenyl)thio)methyl)-1,3,5-trimethylindolin-2-one (3w)**: colourless oil; 85 mg, yield: 90%;  $^1\text{H}$  NMR (400 MHz,  $\text{CDCl}_3$ )  $\delta$  7.16-7.09 (m, 1H), 7.06 (td,  $J = 7.6, 1.8$  Hz, 1H), 7.00 (ddd,  $J = 7.9, 1.8, 0.9$  Hz, 1H), 6.95-6.86 (m, 2H), 6.84 (s, 1H), 6.71 (d,  $J = 7.9$  Hz, 1H), 3.40 (d,  $J = 13.2$  Hz, 1H), 3.31 (d,  $J = 13.2$  Hz, 1H), 3.20 (s, 3H), 2.19 (s, 3H), 1.40 (s, 3H);  $^{13}\text{C}$  NMR (100 MHz,  $\text{CDCl}_3$ )  $\delta$  178.9, 161.7 (d,  $J = 245.6$  Hz), 141.2, 133.6, 132.0, 131.9, 128.9, 128.8, 128.5, 124.1 (d,  $J = 3.7$  Hz), 124.0, 122.5 (d,  $J = 17.5$  Hz), 115.4 (d,  $J = 22.7$  Hz), 107.7, 49.5, 41.6 (d,  $J = 2.9$  Hz), 26.3, 23.2, 21.0;  $^{19}\text{F}$  NMR (565 MHz,  $\text{CDCl}_3$ )  $\delta$  -108.3. HRMS (ESI)  $m/z$ : calcd for  $\text{C}_{18}\text{H}_{19}\text{FNOS}$  [ $\text{M} + \text{H}$ ] $^+$  316.1171; Found 316.1169.

**3-(((3-Fluorophenyl)thio)methyl)-1,3,5-trimethylindolin-2-one (3x)**: colourless oil; 75 mg, yield: 79%;  $^1\text{H}$  NMR (600 MHz,  $\text{CDCl}_3$ )  $\delta$  7.12 (td,  $J = 8.0, 6.1$  Hz, 1H), 7.05 (ddd,  $J = 7.9, 1.8, 0.9$  Hz, 1H), 6.95 (ddd,  $J = 7.9, 1.7, 0.9$  Hz, 1H), 6.89 (s, 1H), 6.85-6.77 (m, 2H), 6.74 (d,  $J = 7.9$  Hz, 1H), 3.37 (d,  $J = 2.7$  Hz, 2H), 3.21 (s, 3H), 2.24 (s, 3H), 1.43 (s, 3H);  $^{13}\text{C}$  NMR (150 MHz,  $\text{CDCl}_3$ )  $\delta$  178.9, 163.3, 161.6, 141.1, 138.6, 138.5, 132.1, 132.0, 129.9, 129.8, 128.6, 125.8, 124.2, 117.2, 117.0, 113.4, 113.3, 107.8, 49.2, 42.6, 26.3, 23.1, 21.0;  $^{19}\text{F}$  NMR (565 MHz,  $\text{CDCl}_3$ )  $\delta$  -112.8. HRMS (ESI)  $m/z$ : calcd for  $\text{C}_{18}\text{H}_{19}\text{FNOS}$  [ $\text{M} + \text{H}$ ] $^+$  316.1171; Found 316.1172.

**1,3,5-Trimethyl-3-((o-tolylthio)methyl)indolin-2-one (3y)**: colourless oil; 71 mg, yield: 76%;  $^1\text{H}$  NMR (400 MHz,  $\text{CDCl}_3$ )  $\delta$  7.22-7.18 (m, 1H), 7.04 (q,  $J = 2.6, 2.0$  Hz, 4H), 6.92 (s, 1H), 6.72 (d,  $J = 7.9$  Hz, 1H), 3.33 (s, 2H), 3.19 (s, 3H), 2.24 (s, 3H), 2.20 (s, 3H), 1.42 (s, 3H);  $^{13}\text{C}$  NMR (100 MHz,  $\text{CDCl}_3$ )  $\delta$  179.1, 141.1, 138.9, 135.3, 132.3, 132.0, 130.9,

129.9, 128.4, 126.5, 126.2, 124.2, 107.7, 49.2, 42.2, 26.3, 23.3, 21.1, 20.5. HRMS (ESI) m/z: calcd for C<sub>19</sub>H<sub>22</sub>NOS [M + H]<sup>+</sup> 312.1422; Found 312.1424.

**3-(((3,5-Dichlorophenyl)thio)methyl)-1,3,5-trimethylindolin-2-one (3z)**: pale yellow oil; 79 mg, yield: 72%; <sup>1</sup>H NMR (600 MHz, CDCl<sub>3</sub>) δ 7.10-7.03 (m, 2H), 6.96 (d, *J* = 1.8 Hz, 2H), 6.82 (s, 1H), 6.75 (d, *J* = 7.9 Hz, 1H), 3.35 (d, *J* = 2.2 Hz, 2H), 3.22 (s, 3H), 2.22 (s, 3H), 1.43 (s, 3H); <sup>13</sup>C NMR (150 MHz, CDCl<sub>3</sub>) δ 178.6, 141.1, 139.6, 134.6, 132.0, 131.6, 128.9, 128.4, 126.5, 124.1, 107.8, 49.3, 42.6, 26.3, 23.0, 21.0. HRMS (ESI) m/z: calcd for C<sub>18</sub>H<sub>18</sub>Cl<sub>2</sub>NOS [M + H]<sup>+</sup> 366.0486; Found 366.0489.

**(Z)-1-Methyl-3-(1-(phenylthio)ethylidene)indolin-2-one (3aa)**: yellow oil; 40 mg, yield: 47%; <sup>1</sup>H NMR (400 MHz, CDCl<sub>3</sub>) δ 7.84 (dd, *J* = 8.1, 1.5 Hz, 1H), 7.61 (ddd, *J* = 8.6, 7.1, 1.5 Hz, 1H), 7.39 (d, *J* = 8.6 Hz, 1H), 7.30 (ddd, *J* = 8.2, 7.1, 1.1 Hz, 1H), 7.21 (d, *J* = 3.8 Hz, 4H), 7.15-7.08 (m, 1H), 3.75 (s, 3H), 2.82 (s, 3H); <sup>13</sup>C NMR (100 MHz, CDCl<sub>3</sub>) δ 160.5, 152.2, 139.6, 136.7, 131.2, 128.9, 127.6, 126.4, 125.7, 125.5, 122.3, 121.0, 114.5, 30.6, 18.4. HRMS (ESI) m/z: calcd for C<sub>17</sub>H<sub>16</sub>NOS [M + H]<sup>+</sup> 282.0953; Found 282.0963.

**3-((Butylthio)methyl)-1,3,5-trimethylindolin-2-one (3ab)**: colourless oil; 61 mg, yield: 73%; <sup>1</sup>H NMR (400 MHz, CDCl<sub>3</sub>) δ 7.09 (d, *J* = 7.1 Hz, 2H), 6.74 (d, *J* = 8.6 Hz, 1H), 3.21 (s, 3H), 3.01 (d, *J* = 13.0 Hz, 1H), 2.90 (d, *J* = 13.0 Hz, 1H), 2.41-2.29 (m, 5H), 1.47-1.36 (m, 5H), 1.33-1.22 (m, 3H), 0.84 (t, *J* = 7.3 Hz, 3H); <sup>13</sup>C NMR (100 MHz, CDCl<sub>3</sub>) δ 179.5, 141.2, 133.0, 131.9, 128.4, 123.9, 107.8, 49.3, 40.2, 33.5, 31.8, 26.3, 23.0, 21.8, 21.2, 13.6. HRMS (ESI) m/z: calcd for C<sub>14</sub>H<sub>24</sub>NOS [M + H]<sup>+</sup> 278.1579; Found 278.1581.

**1,3,5-Trimethyl-3-((phenylselanyl)methyl)indolin-2-one (3ac)<sup>9</sup>**: pale yellow oil; 85 mg, yield: 82%; <sup>1</sup>H NMR (400 MHz, CDCl<sub>3</sub>) δ 7.33-7.25 (m, 2H), 7.19-7.11 (m, 3H), 7.04 (ddd, *J* = 7.9, 1.8, 0.9 Hz, 1H), 6.84 (s, 1H), 6.73 (d, *J* = 7.9 Hz, 1H), 3.40-3.24 (m, 2H), 3.21 (s, 3H), 2.21 (s, 3H), 1.44 (s, 3H); <sup>13</sup>C NMR (100 MHz, CDCl<sub>3</sub>) δ 179.3, 141.0, 133.6, 132.7, 132.0, 130.2, 128.7, 128.5, 127.0, 124.0, 107.7, 49.2, 36.1, 26.3, 23.7, 21.1. HRMS (ESI) m/z: calcd for C<sub>18</sub>H<sub>20</sub>NOSe [M + H]<sup>+</sup> 346.0710; Found 346.0712.

**3-(((4-Fluorophenyl)selanyl)methyl)-1,3,5-trimethylindolin-2-one (3ad)**: pale yellow oil; 85mg, yield: 78%; <sup>1</sup>H NMR (600 MHz, CDCl<sub>3</sub>) δ 7.25-7.19 (m, 2H), 7.05 (ddd, *J* = 7.9, 1.7, 0.8 Hz, 1H), 6.85-6.78 (m, 2H), 6.77 (s, 1H), 6.74 (d, *J* = 7.8 Hz, 1H), 3.33-3.24 (m, 2H), 3.22 (s, 3H), 2.21 (s, 3H), 1.42 (s, 3H); <sup>13</sup>C NMR (150 MHz, CDCl<sub>3</sub>) δ 179.2, 163.1, 161.5, 141.0, 136.1, 136.1, 132.5, 132.0, 128.5, 124.5, 123.9, 115.9, 115.7, 107.8, 49.4, 36.7, 26.3, 23.9, 21.0; <sup>19</sup>F NMR (565 MHz, CDCl<sub>3</sub>) δ -114.8. HRMS (ESI) m/z: calcd for C<sub>18</sub>H<sub>19</sub>FNOSe [M + H]<sup>+</sup> 364.0616; Found 364.0615.

**3-(((4-Bromophenyl)selanyl)methyl)-1,3,5-trimethylindolin-2-one (3ae)**: pale yellow oil; 91 mg, yield: 72%; <sup>1</sup>H NMR (400 MHz, CDCl<sub>3</sub>) δ 7.26-7.18 (m, 2H), 7.12-7.07 (m, 2H), 7.03 (ddd, *J* = 7.8, 1.8, 0.9 Hz, 1H), 6.79-6.69 (m, 2H), 3.36-3.24 (m, 2H), 3.21 (s, 3H), 2.21 (s, 3H), 1.42 (s, 3H); <sup>13</sup>C NMR (100 MHz, CDCl<sub>3</sub>) δ 179.2, 141.0, 135.3, 132.3, 132.1, 131.7, 128.9, 128.5, 123.9, 121.4, 107.8, 49.3, 36.3, 26.3, 23.8, 21.0. HRMS (ESI) m/z: calcd for C<sub>18</sub>H<sub>19</sub>BrNOSe [M + H]<sup>+</sup> 423.9815; Found 423.9812.

**3-(((4-Methoxyphenyl)selanyl)methyl)-1,3,5-trimethylindolin-2-one (3af)**: pale yellow oil; 93 mg, yield: 83%; <sup>1</sup>H NMR (400 MHz, CDCl<sub>3</sub>) δ 7.21-7.15 (m, 2H), 7.04 (ddd, *J* = 7.9, 1.7, 0.9 Hz, 1H), 6.81 (s, 1H), 6.74 (d, *J* = 7.9 Hz, 1H), 6.69-6.64 (m, 2H), 3.76 (s,

3H), 3.25 (d,  $J = 2.8$  Hz, 2H), 3.22 (s, 3H), 2.22 (s, 3H), 1.41 (s, 3H);  $^{13}\text{C}$  NMR (100 MHz,  $\text{CDCl}_3$ )  $\delta$  179.4, 159.2, 141.1, 136.0, 132.7, 131.9, 128.4, 124.0, 120.3, 114.4, 107.7, 55.2, 49.4, 36.8, 26.3, 23.9, 21.1. HRMS (ESI)  $m/z$ : calcd for  $\text{C}_{19}\text{H}_{22}\text{NO}_2\text{Se}$  [ $\text{M} + \text{H}$ ] $^+$  376.0816; Found 376.0807.

**1,3,5-Trimethyl-3-((4-(trifluoromethyl)phenyl)selanyl)methyl)indolin-2-one (3ag)**: yellow oil; 56 mg, yield: 45%;  $^1\text{H}$  NMR (400 MHz,  $\text{CDCl}_3$ )  $\delta$  7.35 (s, 4H), 7.03 (ddd,  $J = 7.9, 1.7, 0.9$  Hz, 1H), 6.78 (s, 1H), 6.73 (d,  $J = 7.9$  Hz, 1H), 3.41-3.33 (m, 2H), 3.21 (s, 3H), 2.17 (s, 3H), 1.45 (s, 3H);  $^{13}\text{C}$  NMR (100 MHz,  $\text{CDCl}_3$ )  $\delta$  179.1, 141.0, 135.3, 133.0, 132.3, 132.1, 129.1, 128.8, 128.6, 125.4, 125.38, 125.3, 125.3, 125.3, 123.9, 122.7, 107.9, 49.2, 35.8, 26.3, 23.7, 20.9;  $^{19}\text{F}$  NMR (377 MHz,  $\text{CDCl}_3$ )  $\delta$  -62.65. HRMS (ESI)  $m/z$ : calcd for  $\text{C}_{19}\text{H}_{19}\text{F}_3\text{NOSe}$  [ $\text{M} + \text{H}$ ] $^+$  414.0584; Found 414.0583.

**3-Methyl-3-((phenylthio)methyl)benzofuran-2(3H)-one (3ah)**: colourless oil; 44 mg, yield: 54%;  $^1\text{H}$  NMR (400 MHz,  $\text{CDCl}_3$ )  $\delta$  7.50-7.45 (m, 2H), 7.37-7.32 (m, 2H), 7.31-7.27 (m, 1H), 7.26 (td,  $J = 1.9, 1.2$  Hz, 1H), 7.23-7.21 (m, 1H), 6.96-6.88 (m, 2H), 3.58 (d,  $J = 13.7$  Hz, 1H), 3.38 (d,  $J = 13.7$  Hz, 1H), 1.68 (s, 3H);  $^{13}\text{C}$  NMR (100 MHz,  $\text{CDCl}_3$ )  $\delta$  173.8, 150.4, 135.7, 130.6, 129.7, 129.5, 129.1, 126.9, 126.6, 126.3, 121.1, 49.2, 45.0, 25.7. HRMS (ESI)  $m/z$ : calcd for  $\text{C}_{16}\text{H}_{15}\text{O}_2\text{S}$  [ $\text{M} + \text{H}$ ] $^+$  271.0793; Found 271.0783.

**5-Methoxy-3-methyl-3-((phenylsulfonyl)methyl)benzofuran-2(3H)-one (3ai)**: colourless oil; 73 mg, yield: 74%;  $^1\text{H}$  NMR (400 MHz,  $\text{CDCl}_3$ )  $\delta$  7.51-7.42 (m, 2H), 7.31-7.25 (m, 2H), 7.24-7.18 (m, 1H), 6.83 (d,  $J = 2.4$  Hz, 3H), 3.79 (s, 3H), 3.57 (d,  $J = 13.7$  Hz, 1H), 3.36 (d,  $J = 13.7$  Hz, 1H), 1.66 (s, 3H);  $^{13}\text{C}$  NMR (100 MHz,  $\text{CDCl}_3$ )  $\delta$  174.1, 157.6, 143.8, 135.7, 130.6, 129.1, 126.8, 122.0, 121.9, 114.6, 114.5, 75.3, 55.6, 45.0, 25.7. HRMS (ESI)  $m/z$ : calcd for  $\text{C}_{17}\text{H}_{17}\text{O}_5\text{S}$  [ $\text{M} + \text{H}$ ] $^+$  333.0797; Found 333.0797.

**5-Chloro-3-methyl-3-((phenylsulfonyl)methyl)benzofuran-2(3H)-one (3aj)**: colourless oil; 73 mg, yield: 72%;  $^1\text{H}$  NMR (400 MHz,  $\text{CDCl}_3$ )  $\delta$  7.51-7.41 (m, 2H), 7.31-7.27 (m, 3H), 7.25-7.19 (m, 1H), 6.85-6.77 (m, 2H), 3.57 (d,  $J = 13.9$  Hz, 1H), 3.35 (d,  $J = 13.9$  Hz, 1H), 1.66 (s, 3H);  $^{13}\text{C}$  NMR (100 MHz,  $\text{CDCl}_3$ )  $\delta$  173.5, 148.8, 135.4, 131.7, 130.7, 129.5, 129.2, 127.0, 122.6, 75.4, 45.0, 25.6. HRMS (ESI)  $m/z$ : calcd for  $\text{C}_{16}\text{H}_{14}\text{ClO}_4\text{S}$  [ $\text{M} + \text{H}$ ] $^+$  337.0301; Found 337.0298.

## 7. General procedure for the synthesis of 4a-4h.

A reaction flask (10.0 mL) was charged with *N*-methyl-*N*-phenylmethacrylamide (0.3 mmol), disulphide (0.15 mmol),  $\text{CoBr}_2$  (0.15 mmol) and  $(\text{NH}_4)_2\text{S}_2\text{O}_8$  (0.6 mmol) in MeCN (1.0 mL). The resulting reaction mixture was heated at 80 °C in an oil bath for 12 h. The progress of the reaction was monitored by TLC. After completion, the reaction mixture was cooled to room temperature and removed the solvent under reduced pressure. The crude product was purified *via* flash column chromatography (PE/EA = 4:1) to give the corresponding 5-bromo substituted sulfurated oxindole.

**5-Bromo-1,3-dimethyl-3-((phenylthio)methyl)indoline (4a)**: colourless oil; 78 mg, yield: 83%;  $^1\text{H}$  NMR (400 MHz,  $\text{CDCl}_3$ )  $\delta$  7.36 (dd,  $J = 8.2, 2.0$  Hz, 1H), 7.17 (dd,  $J = 3.5, 1.5$  Hz, 6H), 6.71 (d,  $J = 8.3$  Hz, 1H), 3.36 (s, 2H), 3.19 (s, 3H), 1.41 (s, 3H);  $^{13}\text{C}$  NMR (100 MHz,  $\text{CDCl}_3$ )  $\delta$  178.5, 142.6, 135.6, 134.2, 131.1, 130.9, 128.8, 126.9, 126.8, 115.2,

109.4, 49.6, 42.8, 26.4, 23.0. HRMS (ESI) m/z: calcd for C<sub>17</sub>H<sub>17</sub>BrNOS [M + H]<sup>+</sup> 362.0214; Found 362.0212.

**5-Bromo-1,3-dimethyl-3-((p-tolylthio)methyl)indolin-2-one (4b)**<sup>7</sup>: colourless oil; 97 mg, yield: 86%; <sup>1</sup>H NMR (400 MHz, CDCl<sub>3</sub>) δ 7.34 (dd, *J* = 8.3, 2.0 Hz, 1H), 7.08 (d, *J* = 2.0 Hz, 1H), 7.05–6.93 (m, 4H), 6.70 (d, *J* = 8.3 Hz, 1H), 3.32 (s, 2H), 3.20 (s, 3H), 2.29 (s, 3H), 1.39 (s, 3H); <sup>13</sup>C NMR (100 MHz, CDCl<sub>3</sub>) δ 178.5, 142.6, 137.1, 134.3, 131.9, 131.6, 130.9, 129.6, 126.8, 115.2, 109.3, 49.8, 43.4, 26.4, 23.1, 21.1. HRMS (ESI) m/z: calcd for C<sub>18</sub>H<sub>19</sub>BrNOS [M + H]<sup>+</sup> 376.0371; Found 376.0370.

**5-Bromo-3-(((4-methoxyphenyl)thio)methyl)-1,3-dimethylindolin-2-one (4c)**: colourless oil; 106 mg, yield: 90%; <sup>1</sup>H NMR (400 MHz, CDCl<sub>3</sub>) δ 7.35 (dd, *J* = 8.3, 2.0 Hz, 1H), 7.10–7.00 (m, 3H), 6.74–6.66 (m, 3H), 3.78 (s, 3H), 3.32–3.22 (m, 2H), 3.21 (s, 3H), 1.37 (s, 3H); <sup>13</sup>C NMR (100 MHz, CDCl<sub>3</sub>) δ 178.6, 159.2, 142.6, 134.3, 134.0, 130.9, 126.7, 125.9, 115.2, 114.4, 109.3, 55.3, 49.9, 44.3, 26.4, 23.2. HRMS (ESI) m/z: calcd for C<sub>18</sub>H<sub>19</sub>BrNO<sub>2</sub>S [M + H]<sup>+</sup> 392.0320; Found 392.0316.

**5-Bromo-3-(((4-chlorophenyl)thio)methyl)-1,3-dimethylindoline (4d)**: colourless oil; 92 mg, yield: 80%; <sup>1</sup>H NMR (600 MHz, CDCl<sub>3</sub>) δ 7.37 (dd, *J* = 8.3, 2.0 Hz, 1H), 7.15–7.11 (m, 3H), 7.08–7.04 (m, 2H), 6.71 (d, *J* = 8.3 Hz, 1H), 3.36–3.31 (m, 2H), 3.19 (s, 3H), 1.41 (s, 3H); <sup>13</sup>C NMR (150 MHz, CDCl<sub>3</sub>) δ 178.3, 142.6, 134.1, 134.0, 133.1, 132.3, 131.1, 128.9, 126.8, 115.3, 109.5, 49.7, 43.0, 26.4, 23.1. HRMS (ESI) m/z: calcd for C<sub>17</sub>H<sub>16</sub>BrClNOS [M + H]<sup>+</sup> 395.9825; Found 395.9822.

**5-Bromo-3-((butylthio)methyl)-1,3-dimethylindolin-2-one (4e)**: colourless oil; 77 mg, yield: 75%; <sup>1</sup>H NMR (600 MHz, CDCl<sub>3</sub>) δ 7.44–7.38 (m, 2H), 6.73 (d, *J* = 8.0 Hz, 1H), 3.21 (s, 3H), 2.99 (d, *J* = 13.1 Hz, 1H), 2.89 (d, *J* = 13.1 Hz, 1H), 2.41–2.30 (m, 2H), 1.46–1.38 (m, 5H), 1.30 (dt, *J* = 14.7, 7.3 Hz, 2H), 0.85 (t, *J* = 7.4 Hz, 3H); <sup>13</sup>C NMR (150 MHz, CDCl<sub>3</sub>) δ 179.0, 142.6, 135.1, 131.0, 126.4, 115.2, 109.5, 49.6, 40.0, 33.7, 31.8, 26.4, 22.8, 21.8, 13.6. HRMS (ESI) m/z: calcd for C<sub>15</sub>H<sub>21</sub>BrNOS [M + H]<sup>+</sup> 342.0527; Found 342.0523.

**5-Bromo-3-(((3,5-dichlorophenyl)thio)methyl)-1,3-dimethylindoline (4f)**: colourless oil; 91 mg, yield: 73%; <sup>1</sup>H NMR (600 MHz, CDCl<sub>3</sub>) δ 7.38 (dd, *J* = 8.4, 2.0 Hz, 1H), 7.14 (t, *J* = 1.9 Hz, 1H), 7.09 (d, *J* = 2.0 Hz, 1H), 6.97 (d, *J* = 1.8 Hz, 2H), 6.74 (d, *J* = 8.3 Hz, 1H), 3.38–3.32 (m, 2H), 3.22 (s, 3H), 1.43 (s, 3H); <sup>13</sup>C NMR (150 MHz, CDCl<sub>3</sub>) δ 178.1, 142.6, 138.9, 134.8, 133.6, 131.5, 128.6, 127.2, 126.7, 115.3, 109.5, 42.5, 26.4, 23.0. HRMS (ESI) m/z: calcd for C<sub>17</sub>H<sub>15</sub>BrCl<sub>2</sub>NOS [M + H]<sup>+</sup> 429.9435; Found 429.9424.

**5-Bromo-3-methyl-1-phenyl-3-((phenylthio)methyl)indolin-2-one (4g)**: colourless oil; 104 mg, yield: 82%; <sup>1</sup>H NMR (600 MHz, CDCl<sub>3</sub>) δ 7.53 (t, *J* = 7.8 Hz, 2H), 7.45–7.36 (m, 3H), 7.26 (dd, *J* = 8.4, 2.0 Hz, 1H), 7.22–7.14 (m, 6H), 6.69 (d, *J* = 8.4 Hz, 1H), 3.50–3.43 (m, 2H), 1.53 (s, 3H); <sup>13</sup>C NMR (150 MHz, CDCl<sub>3</sub>) δ 178.1, 142.7, 135.6, 134.3, 133.9, 131.0, 131.0, 129.7, 128.8, 128.3, 127.0, 126.9, 126.7, 115.6, 110.8, 49.82, 43.54, 23.3. HRMS (ESI) m/z: calcd for C<sub>22</sub>H<sub>19</sub>BrNOS [M + H]<sup>+</sup> 424.0371; Found 424.0359.

**8-Bromo-1-methyl-1-((phenylthio)methyl)-5,6-dihydro-4H-pyrrolo[3,2,1-ij]quinolin-2(1H)-one (4h)**: colourless oil; 96 mg, yield: 83%; <sup>1</sup>H NMR (600 MHz, CDCl<sub>3</sub>) δ 7.23–7.10 (m, 6H), 7.05 (s, 1H), 3.69 (dd, *J* = 12.9, 6.5 Hz, 2H), 3.41–3.30 (m, 2H), 2.82–2.70 (m, 2H), 2.04–1.97 (m, 2H), 1.42 (s, 3H); <sup>13</sup>C NMR (150 MHz, CDCl<sub>3</sub>) δ 177.3, 138.2, 135.7, 132.7, 130.8, 129.9, 128.8, 126.8, 124.7, 121.8, 114.8, 50.7, 42.5, 38.8, 24.4, 22.7, 21.0. HRMS (ESI) m/z: calcd for C<sub>19</sub>H<sub>19</sub>BrNOS [M + H]<sup>+</sup> 388.0371; Found 388.0375.

**1,3-Dimethyl-3-((phenylsulfonyl)methyl)indolin-2-one (5).** To a solution of **3a** (0.3 mmol) in CH<sub>2</sub>Cl<sub>2</sub> (2.0 mL) was added *m*-chloroperbenzoic acid (0.9 mmol) portion wise at 0 °C. The mixture was stirred for 4 h until complete consumption of the starting material. Saturated aqueous NaHCO<sub>3</sub> solution was added and the resulting mixture was extracted with CH<sub>2</sub>Cl<sub>2</sub> (10 mL×3). The combined organic layers were dried over anhydrous Na<sub>2</sub>SO<sub>4</sub> and concentrated under reduced pressure. The crude product was purified *via* flash column chromatography (PE/EA=1:1) to give the desired product **5** as a white solid (77 mg, 81%). Mp: 145-147 °C; <sup>1</sup>H NMR (600 MHz, CDCl<sub>3</sub>) δ 7.58-7.48 (m, 3H), 7.41-7.36 (m, 2H), 7.28 (t, *J* = 7.7 Hz, 1H), 7.05 (dd, *J* = 7.5, 1.3 Hz, 1H), 6.90 (td, *J* = 7.6, 1.0 Hz, 1H), 6.85 (d, *J* = 7.7 Hz, 1H), 3.88 (d, *J* = 14.7 Hz, 1H), 3.69 (d, *J* = 14.6 Hz, 1H), 3.17 (s, 3H), 1.39 (s, 3H); <sup>13</sup>C NMR (150 MHz, CDCl<sub>3</sub>) δ 177.6, 143.3, 139.9, 133.4, 129.5, 128.9, 128.6, 127.8, 124.1, 122.6, 108.4, 61.9, 45.6, 26.6, 25.5. HRMS (ESI) *m/z*: calcd for C<sub>17</sub>H<sub>18</sub>NO<sub>3</sub>S [M + H]<sup>+</sup> 316.1007; Found 316.1006.

**1,3-Dimethyl-3-((phenylsulfinyl)methyl)indolin-2-one (6).** To a stirred solution of **3a** (0.3 mmol) in CH<sub>3</sub>COOH (2.0 mL) at room temperature was added 30% H<sub>2</sub>O<sub>2</sub> (aq. 0.6 mmol, 0.061 mL, 2.0 eq). The mixture was stirred at 50 °C for 6 h until complete consumption of the starting material. The mixture was washed with 1.0 M NaOH solution (2.0 mL) and the resulting mixture was extracted with EtOAc (10 mL×3). The combined organic layers were dried over anhydrous Na<sub>2</sub>SO<sub>4</sub> and concentrated under reduced pressure. The crude product was purified *via* flash column chromatography (PE/EA=1:2) to give the desired product **6** as a colourless oil (76 mg, 85%). <sup>1</sup>H NMR (400 MHz, CDCl<sub>3</sub>) δ 7.62-7.52 (m, 2H), 7.46 (q, *J* = 2.6, 1.9 Hz, 10H), 7.35 (qd, *J* = 7.9, 1.3 Hz, 2H), 7.14 (dtd, *J* = 17.3, 7.5, 1.0 Hz, 2H), 6.90 (dd, *J* = 7.8, 3.3 Hz, 2H), 3.38 (dd, *J* = 13.5, 2.1 Hz, 2H), 3.29-3.14 (m, 7H), 3.03 (d, *J* = 13.4 Hz, 1H), 1.57 (s, 3H), 1.53 (s, 3H); <sup>13</sup>C NMR (100 MHz, CDCl<sub>3</sub>) δ 178.2, 144.5, 144.1, 143.1, 142.9, 131.2, 131.1, 131.0, 129.3, 129.2, 128.9, 124.4, 124.2, 124.0, 124.0, 123.0, 122.7, 108.6, 108.5, 65.8, 65.6, 46.8, 46.5, 26.6, 26.4, 24.5, 24.0. HRMS (ESI) *m/z*: calcd for C<sub>17</sub>H<sub>18</sub>NO<sub>2</sub>S [M + H]<sup>+</sup> 300.1058; Found 300.1058.

**1,3-Dimethyl-3-((phenylthio)methyl)indoline (7).** To a solution of **3a** in dry THF (3.0 mL) under an inert atmosphere (N<sub>2</sub>) was added LiAlH<sub>4</sub> (34 mg; 3.0 eq.). The reaction mixture was stirred at refluxed for 8 h. Then, the excess LiAlH<sub>4</sub> was carefully hydrolyzed with NaOH solution (1.0 M, 10 mL). The aqueous layer is extracted with EtOAc (20 mL ×3). The combined organic layers were washed with brine, dried over Na<sub>2</sub>SO<sub>4</sub> and concentrated *in vacuo*. The crude product was purified *via* flash column chromatography (PE/EA=4:1) to give the final product **7** as a colourless oil (68 mg, 84%). <sup>1</sup>H NMR (400 MHz, CDCl<sub>3</sub>) δ 7.34-7.28 (m, 2H), 7.23 (dd, *J* = 8.5, 6.9 Hz, 2H), 7.13 (ddt, *J* = 7.9, 6.4, 1.2 Hz, 2H), 7.07 (dd, *J* = 7.3, 1.3 Hz, 1H), 6.71 (t, *J* = 7.3 Hz, 1H), 6.52 (d, *J* = 7.8 Hz, 1H), 3.46 (d, *J* = 9.1 Hz, 1H), 3.24-3.16 (m, 2H), 3.00 (d, *J* = 9.2 Hz, 1H), 2.75 (s, 3H), 1.43 (s, 3H); <sup>13</sup>C NMR (100 MHz, CDCl<sub>3</sub>) δ 152.1, 137.8, 136.4, 128.8, 128.3, 125.7, 122.4, 118.0, 107.6, 67.1, 45.0, 44.2, 35.7, 24.0. HRMS (ESI) *m/z*: calcd for C<sub>17</sub>H<sub>20</sub>NS [M + H]<sup>+</sup> 270.1316; Found 270.1321.



## 8. References

- (1) A. Pinto, Y. Jia, L. Neuville and J. Zhu, *Chem. Eur. J.*, 2007, **13**, 961-967.
- (2) H.-L. Wei, T. Piou, J. Dufour, L. Neuville and J. Zhu, *Org. Lett.*, 2011, **13**, 2244-2247.
- (3) Z. Li, F. Ke, H. Deng, H. Xu, H. Xiang and X. Zhou, *Org. Biomol. Chem.*, 2013, **11**, 2943-2946.
- (4) C.-S. Wang, T. Roisnel, P. H. Dixneuf, J.-F. Soulé, *Adv. Synth. Catal.*, 2019, **361**, 445-450.
- (5) M. Klusmann, E. Boess, S. Karanestora, A.-E. Bosnidou, B. Schweitzer-Chaput and M. Hasenbeck, *Synlett.*, 2015, **26**, 1973-1976.
- (6) D. Kommula, Q. Li, S. Ning, W. Liu, Q. Wang and Z. K. Zhao, *Synth Commun.*, 2020, **50**, 1026-1034.
- (7) F.-X. Wang and S.-K. Tian, *J. Org. Chem.*, 2015, **80**, 12697-12703.
- (8) D.-L. Kong, J.-X. Du, W.-M. Chu, C.-Y. Ma, J.-Y. Tao and W.-H. Feng, *Molecules.*, 2018, **23**, 2727.
- (9) X.-Y. Wang, Y.-F. Zhong, Z.-Y. Mo, S.-H. Wu, Y.-L. Xu, H.-T. Tang, Y.-M. Pan, *Adv. Synth. Catal.*, 2021, **363**, 208-214.

## 9. $^1\text{H}$ NMR, $^{13}\text{C}$ NMR and HRMS spectra of the synthesized compounds

### 1,3-Dimethyl-3-((phenylthio)methyl)indolin-2-one (3a)

$^1\text{H}$  NMR (400 MHz,  $\text{CDCl}_3$ )

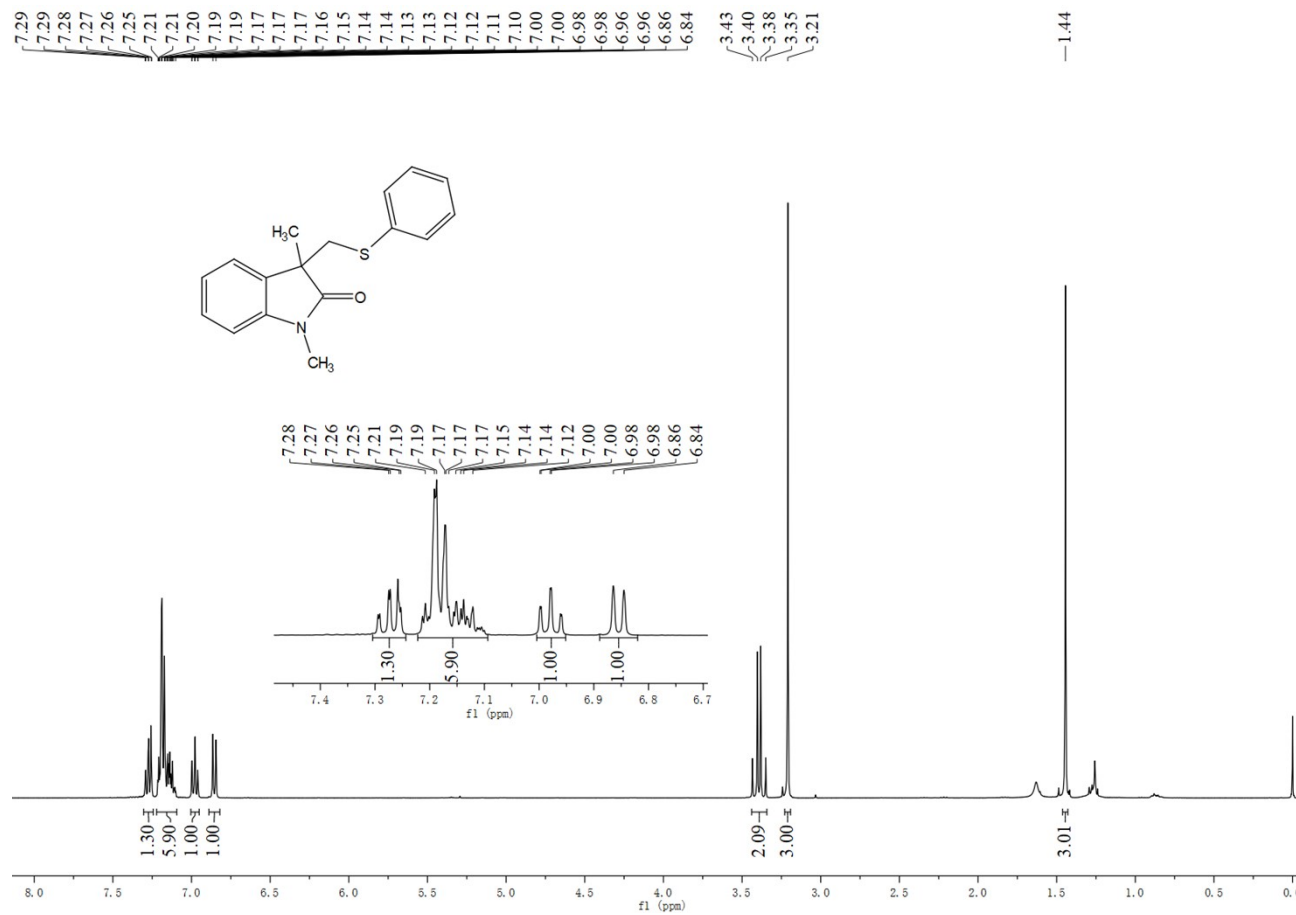

$^{13}\text{C}$  NMR (400 MHz,  $\text{CDCl}_3$ )

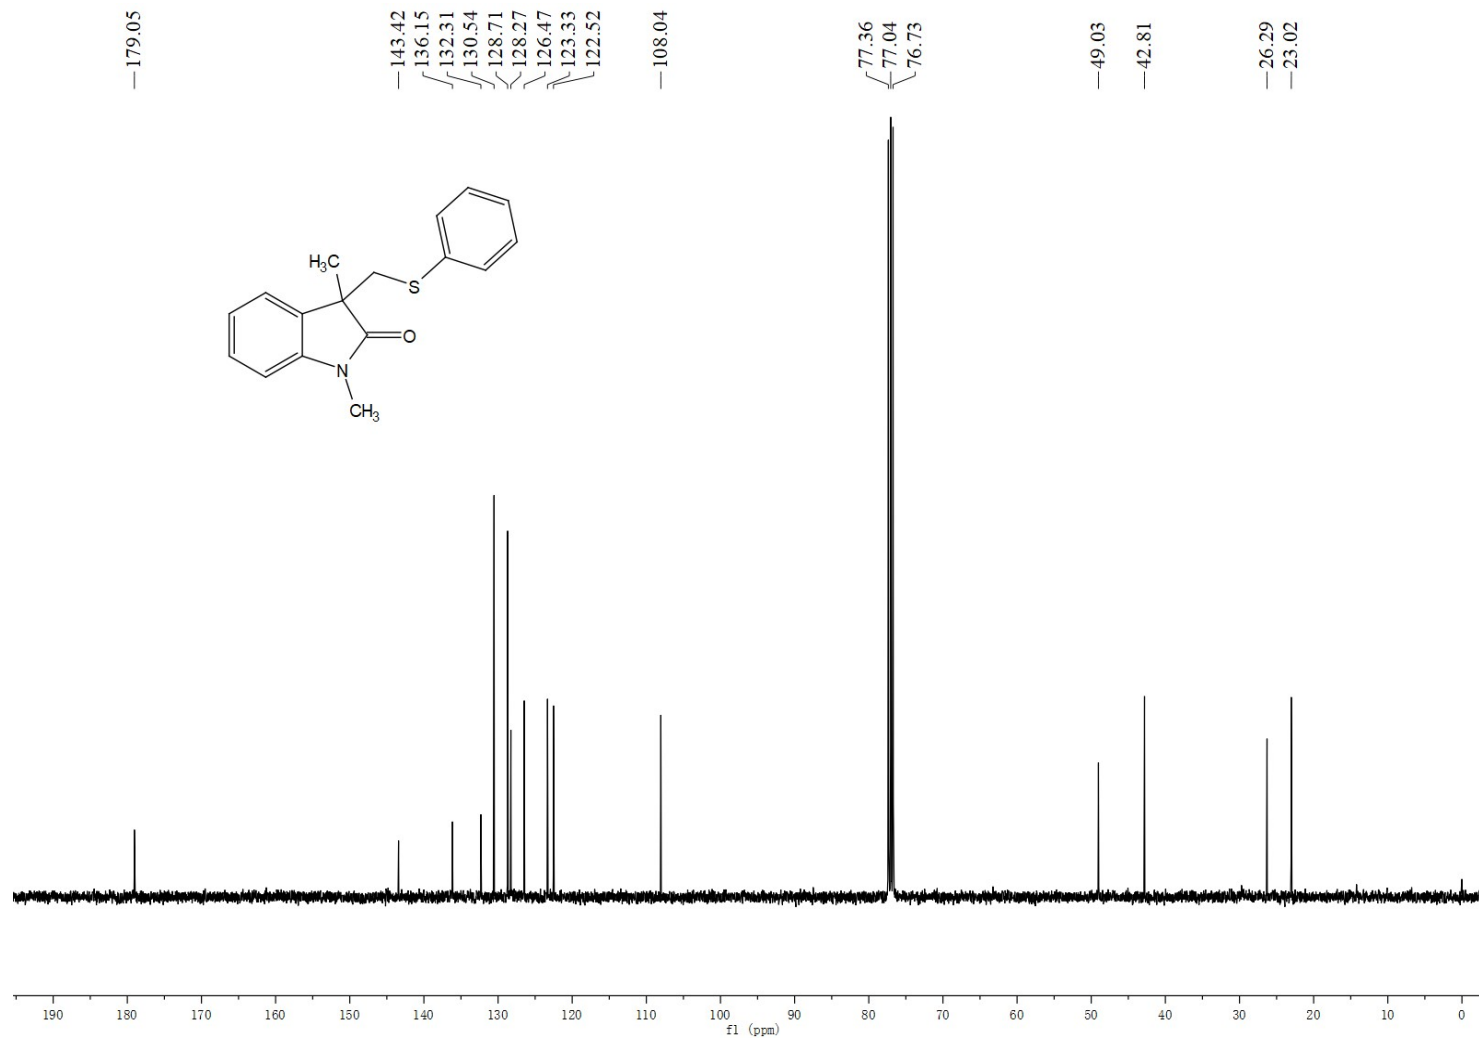

HRMS (ESI)

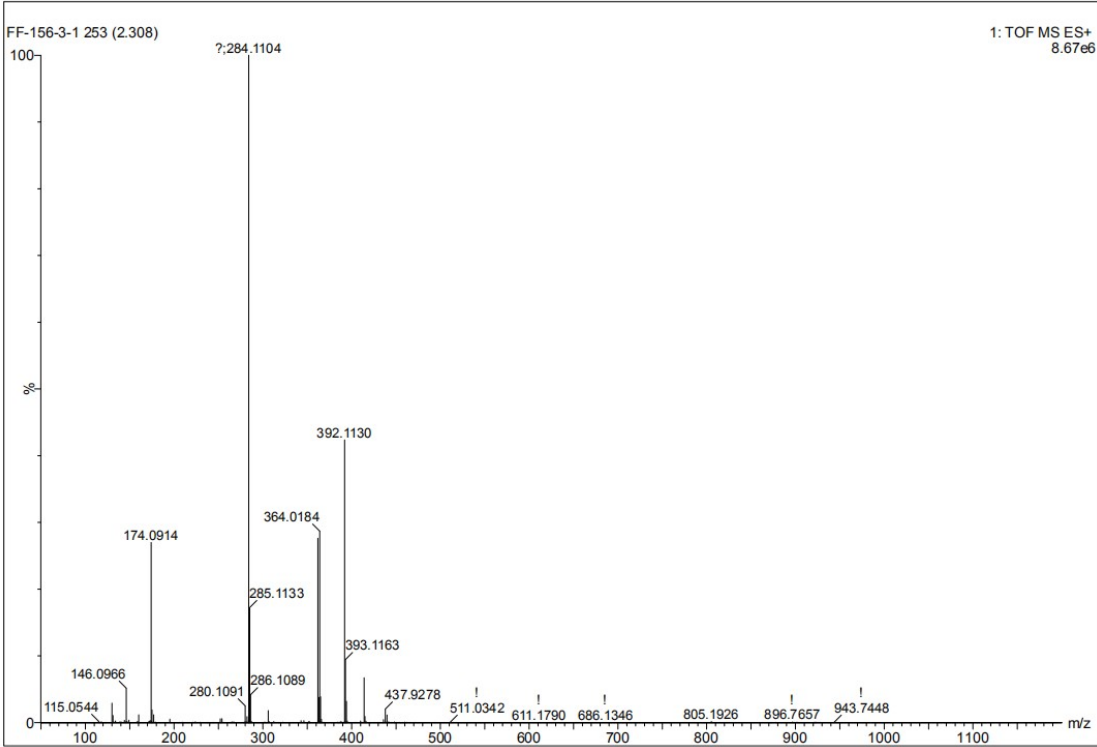

### 1,3-Dimethyl-3-((p-tolylthio)methyl)indolin-2-one (3b)

$^1\text{H}$  NMR (400 MHz,  $\text{CDCl}_3$ )

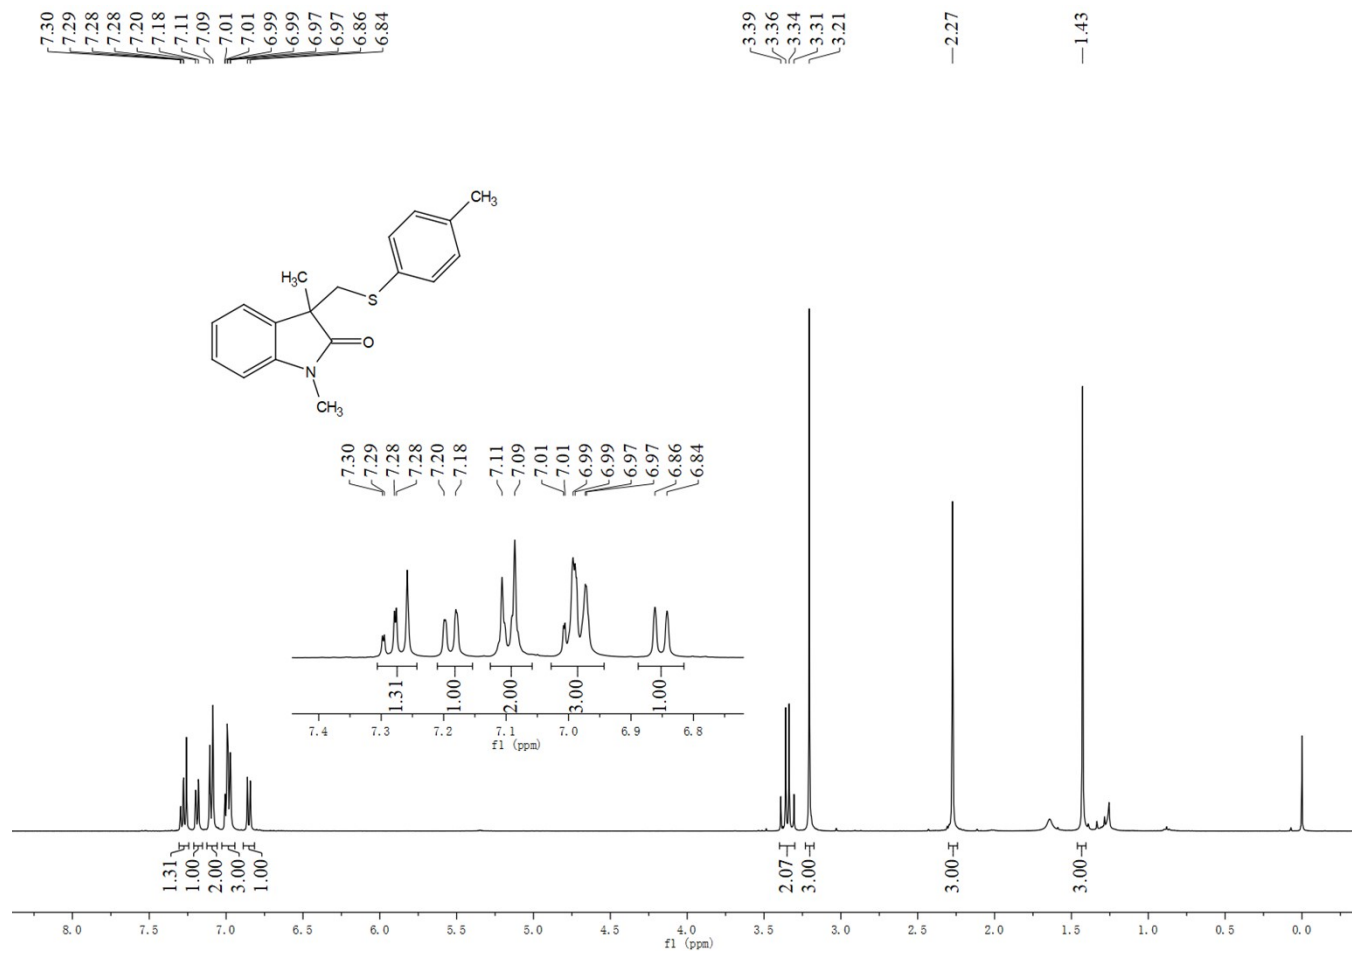

$^{13}\text{C}$  NMR (100 MHz,  $\text{CDCl}_3$ )

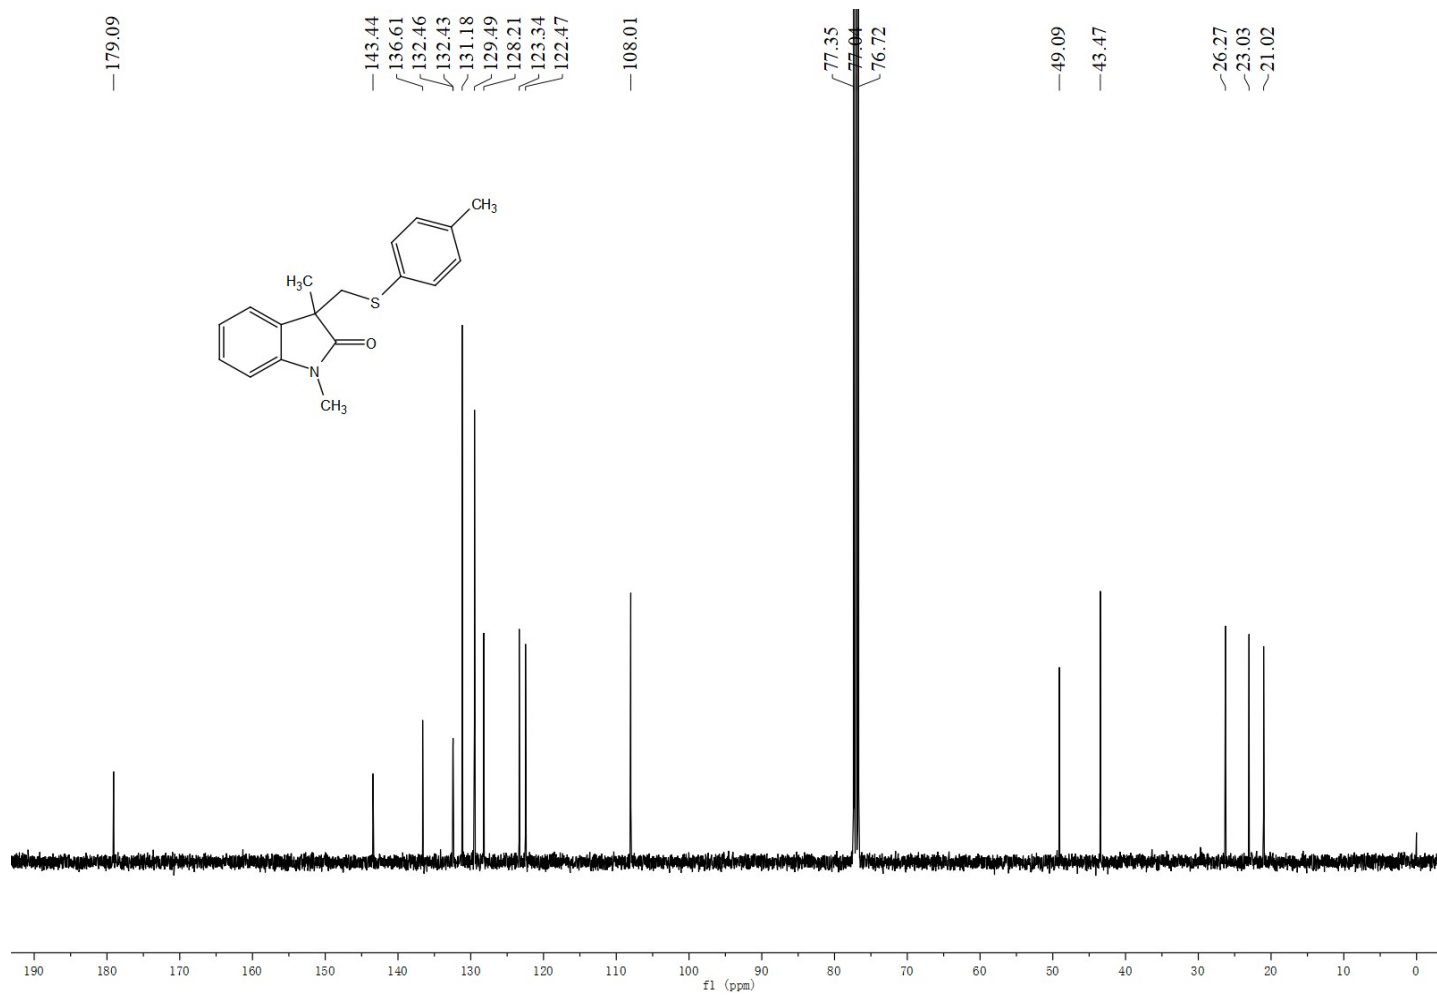

HRMS (ESI)

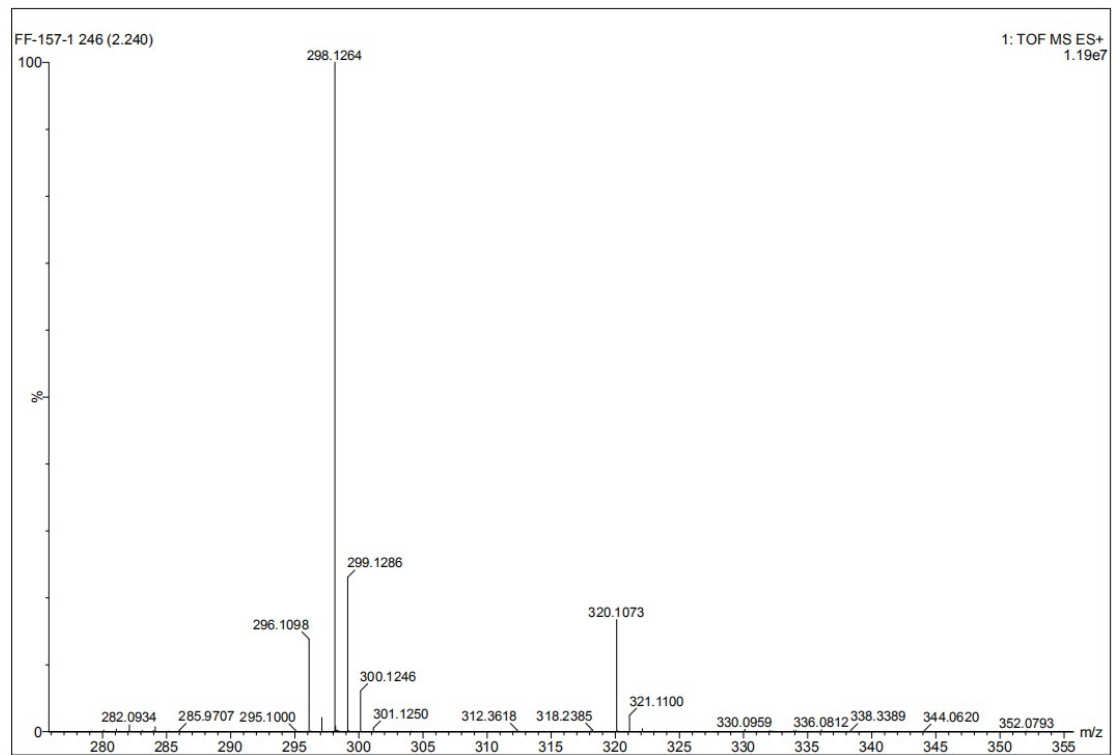

### 3-(((4-Methoxyphenyl)thio)methyl)-1,3-dimethylindolin-2-one (3c)

$^1\text{H}$  NMR (600 MHz,  $\text{CDCl}_3$ )

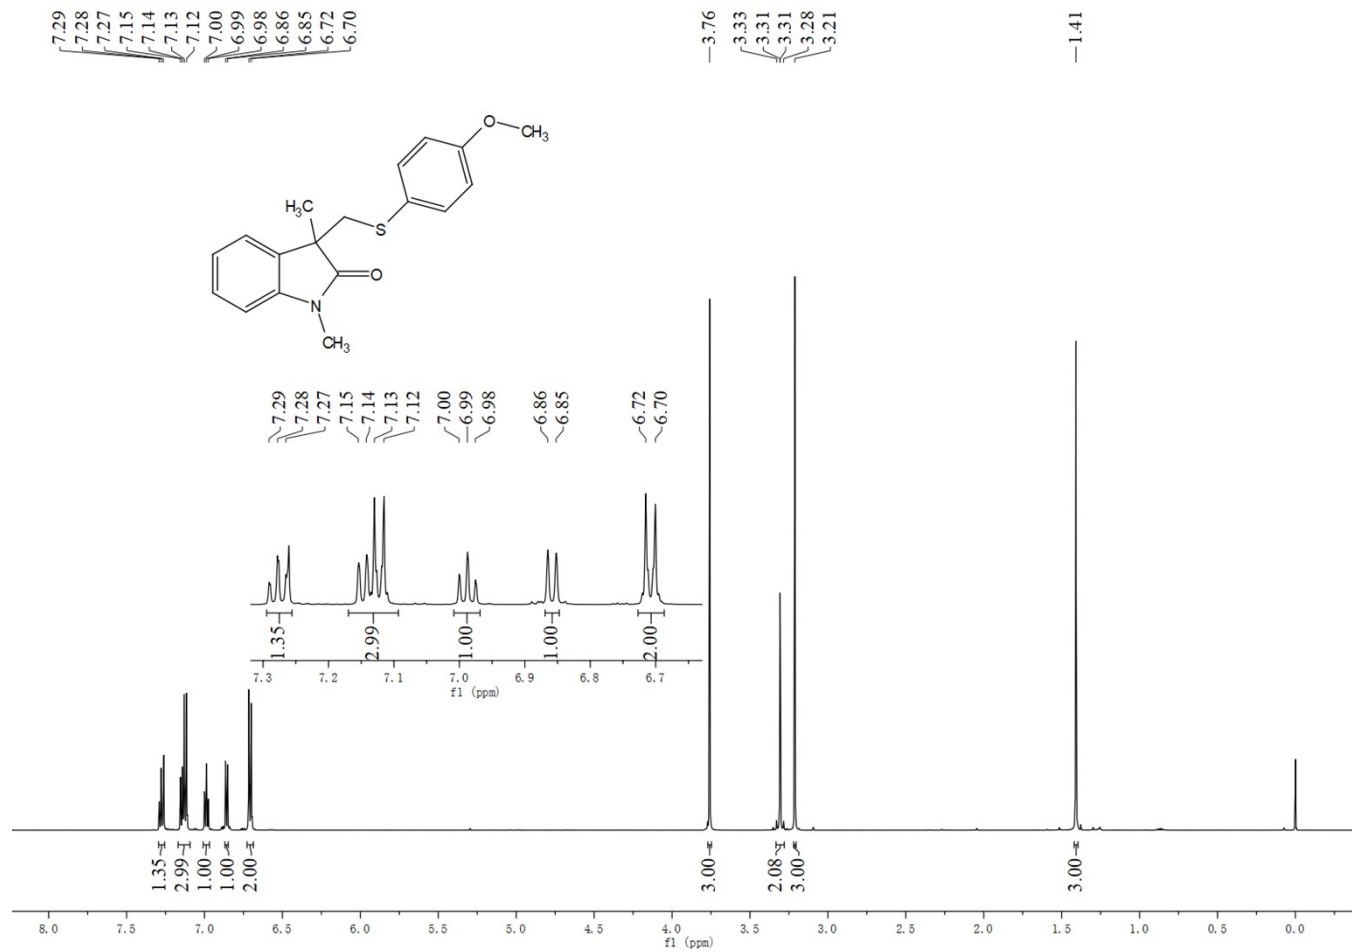



$^{13}\text{C}$  NMR (150 MHz,  $\text{CDCl}_3$ )

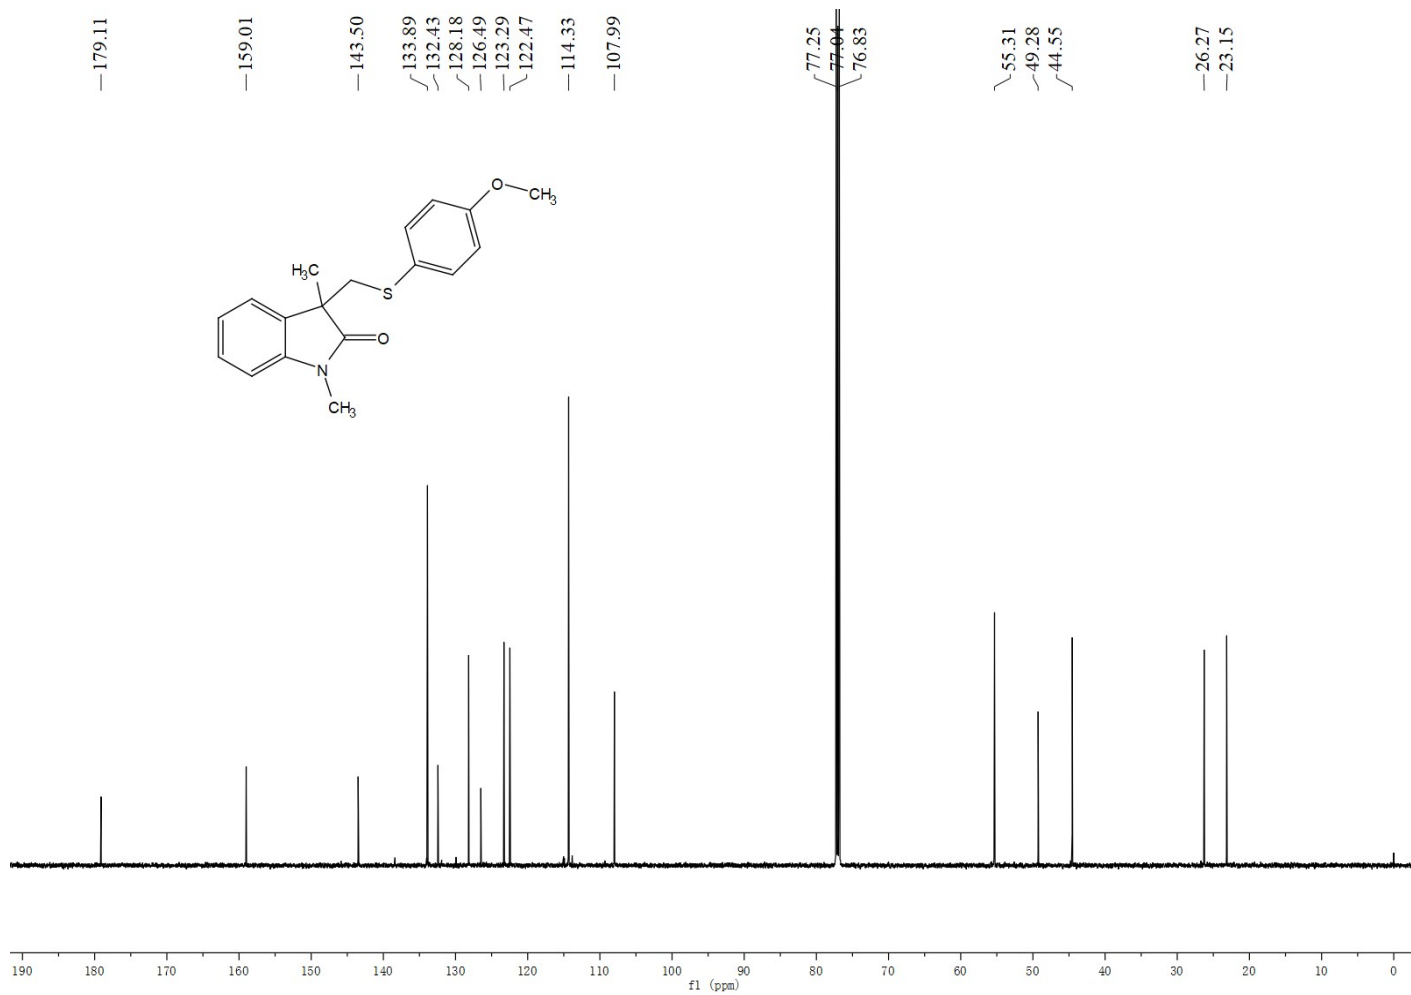

HRMS (ESI)

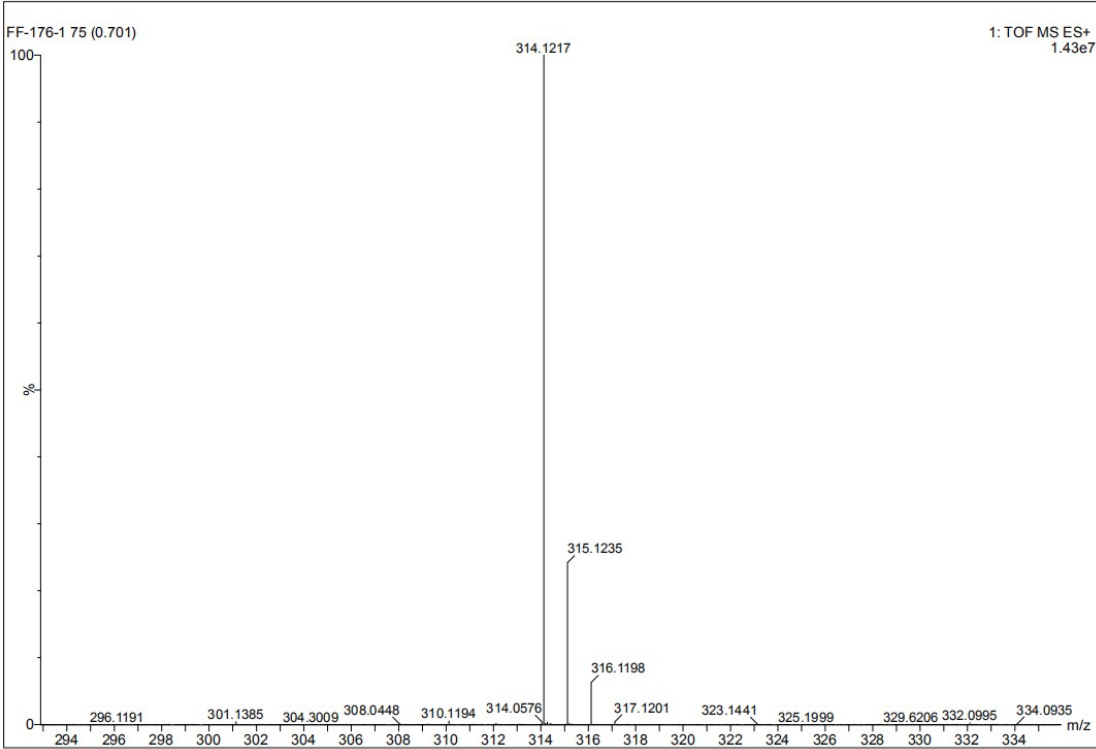

**3-(((4-Chlorophenyl)thio)methyl)-1,3-dimethylindolin-2-one (3d)**

$^1\text{H}$  NMR (600 MHz,  $\text{CDCl}_3$ )

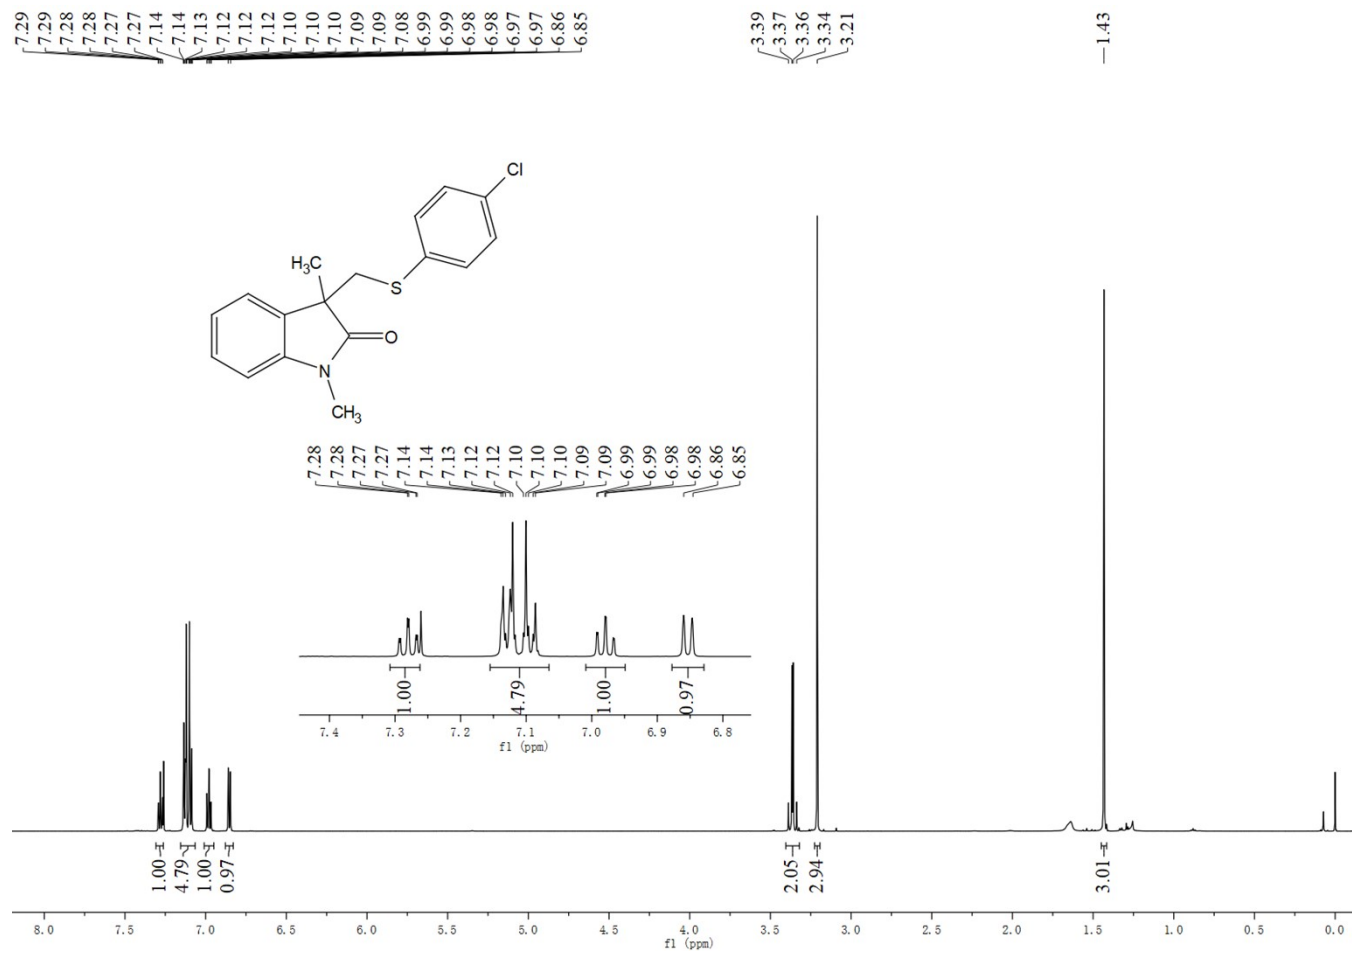

$^{13}\text{C}$  NMR (150 MHz,  $\text{CDCl}_3$ )

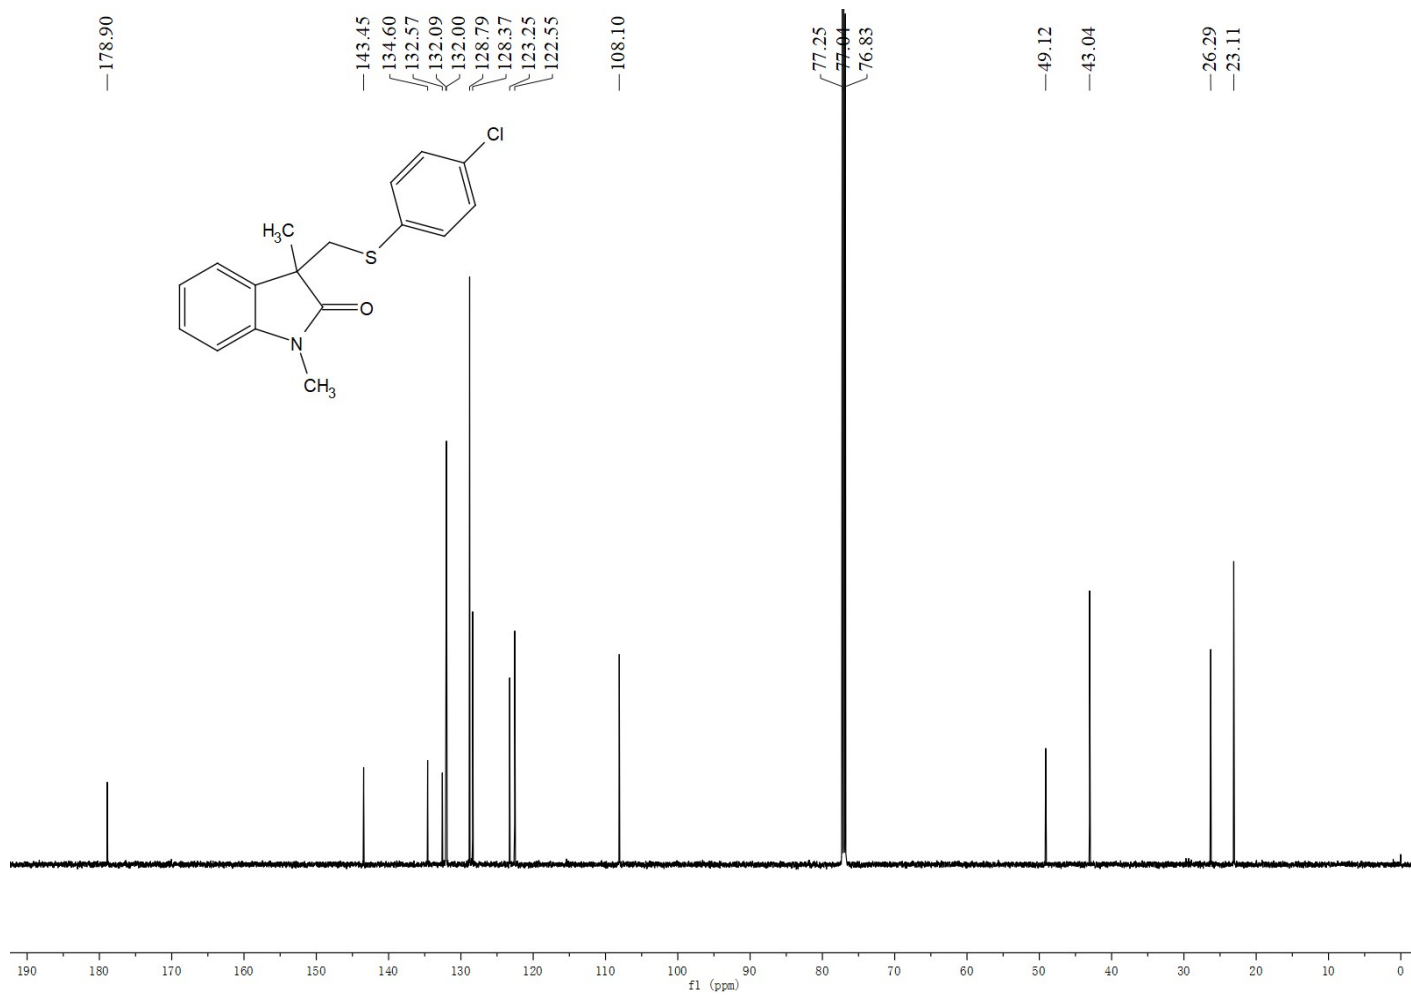

# HRMS (ESI)

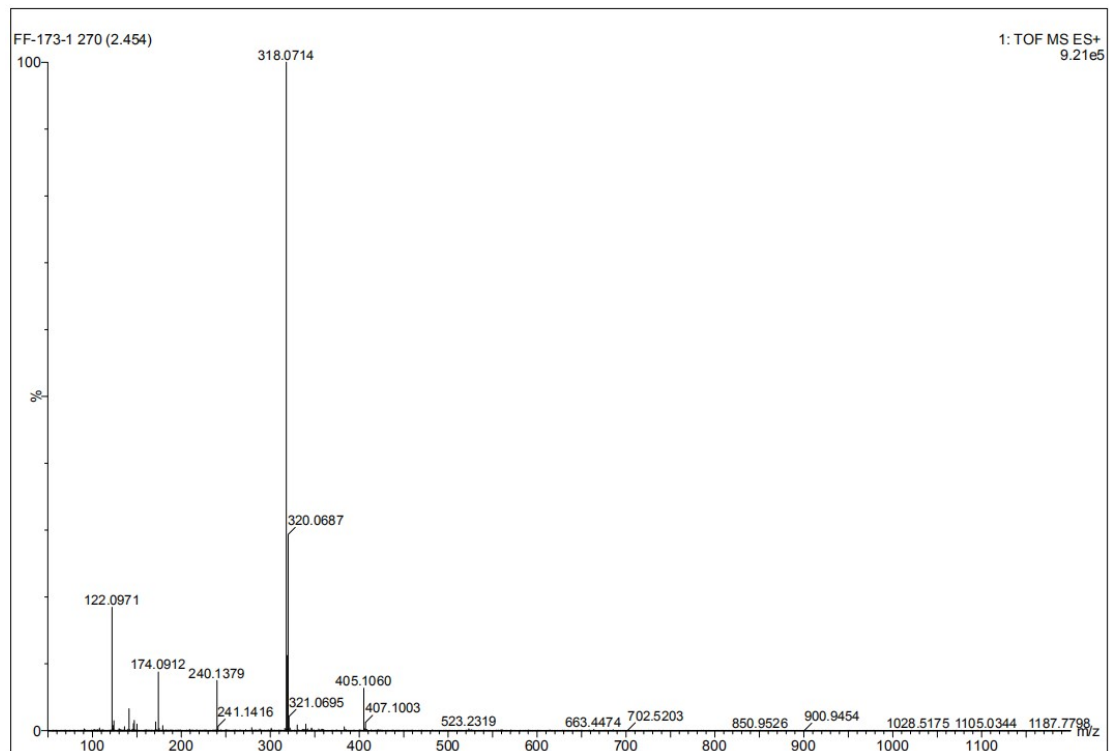

# 1,3-Dimethyl-3-(((4-nitrophenyl)thio)methyl)indolin-2-one (3e)

<sup>1</sup>H NMR (600 MHz, CDCl<sub>3</sub>)

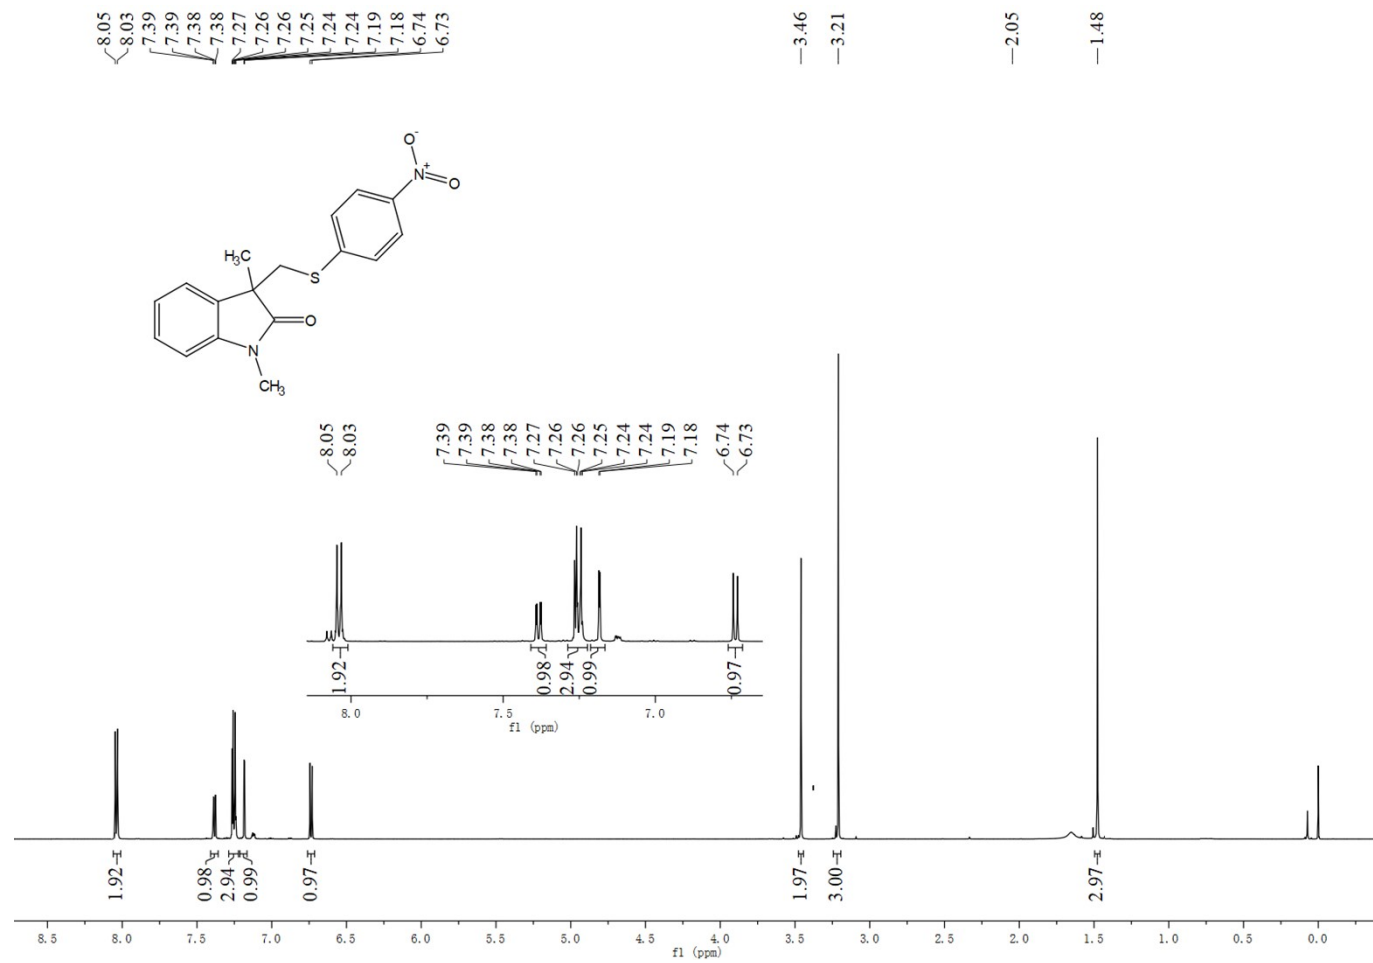

$^{13}\text{C}$  NMR (150 MHz,  $\text{CDCl}_3$ )

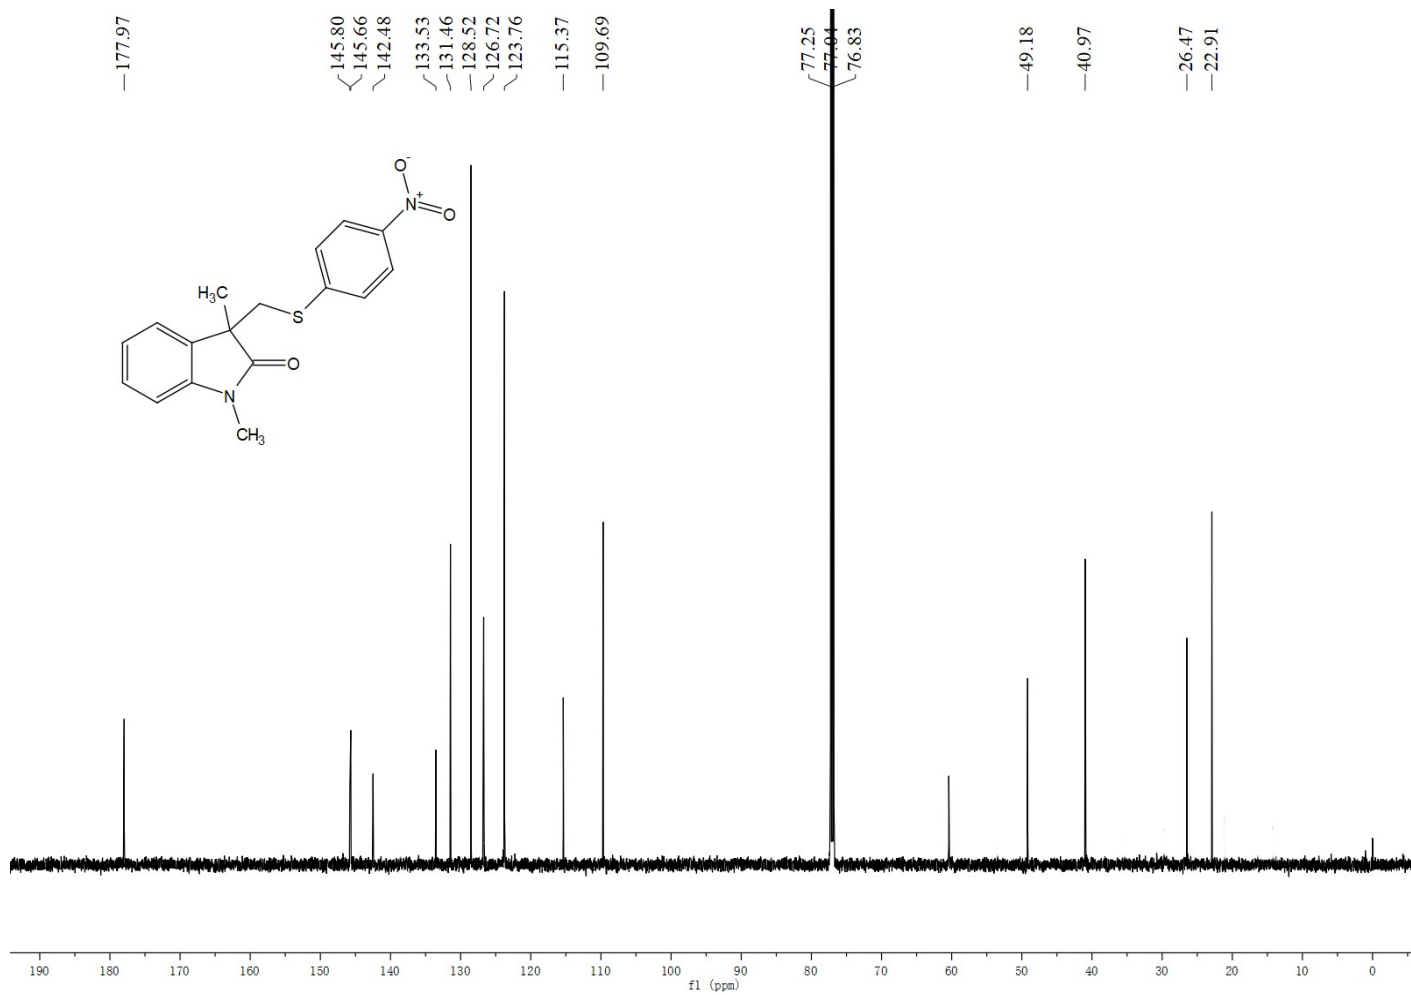

HRMS (ESI)

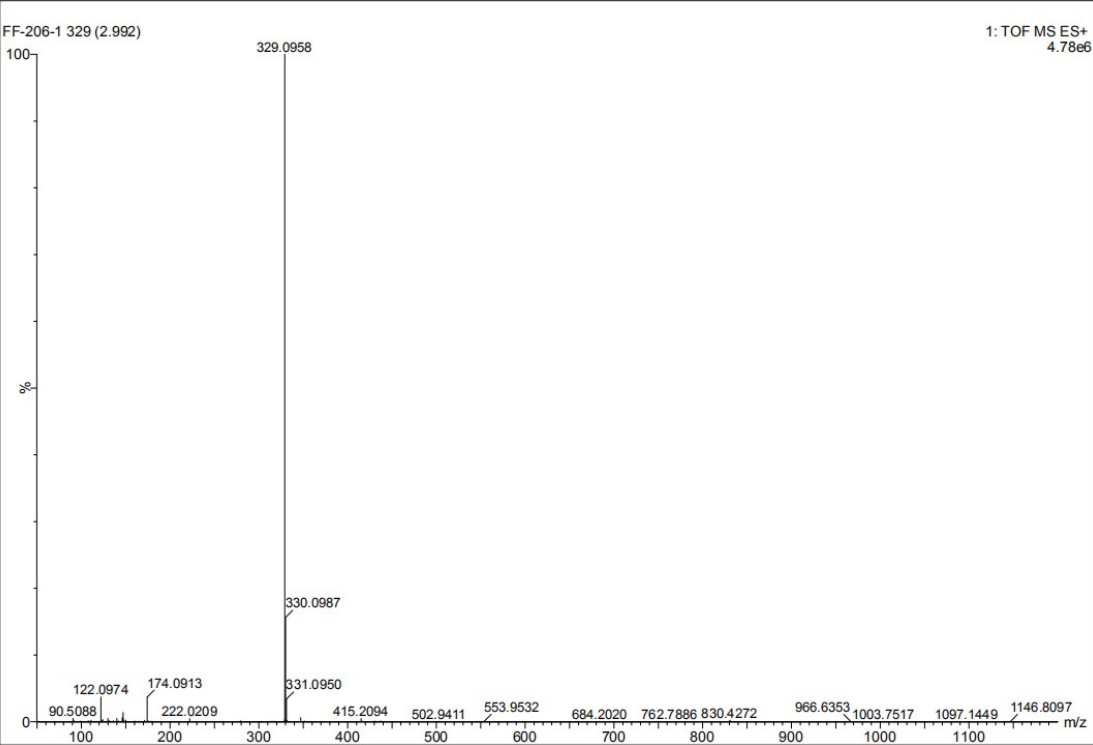



### 3-Methyl-3-((phenylthio)methyl)indolin-2-one (3f)

$^1\text{H}$  NMR (600 MHz,  $\text{CDCl}_3$ )

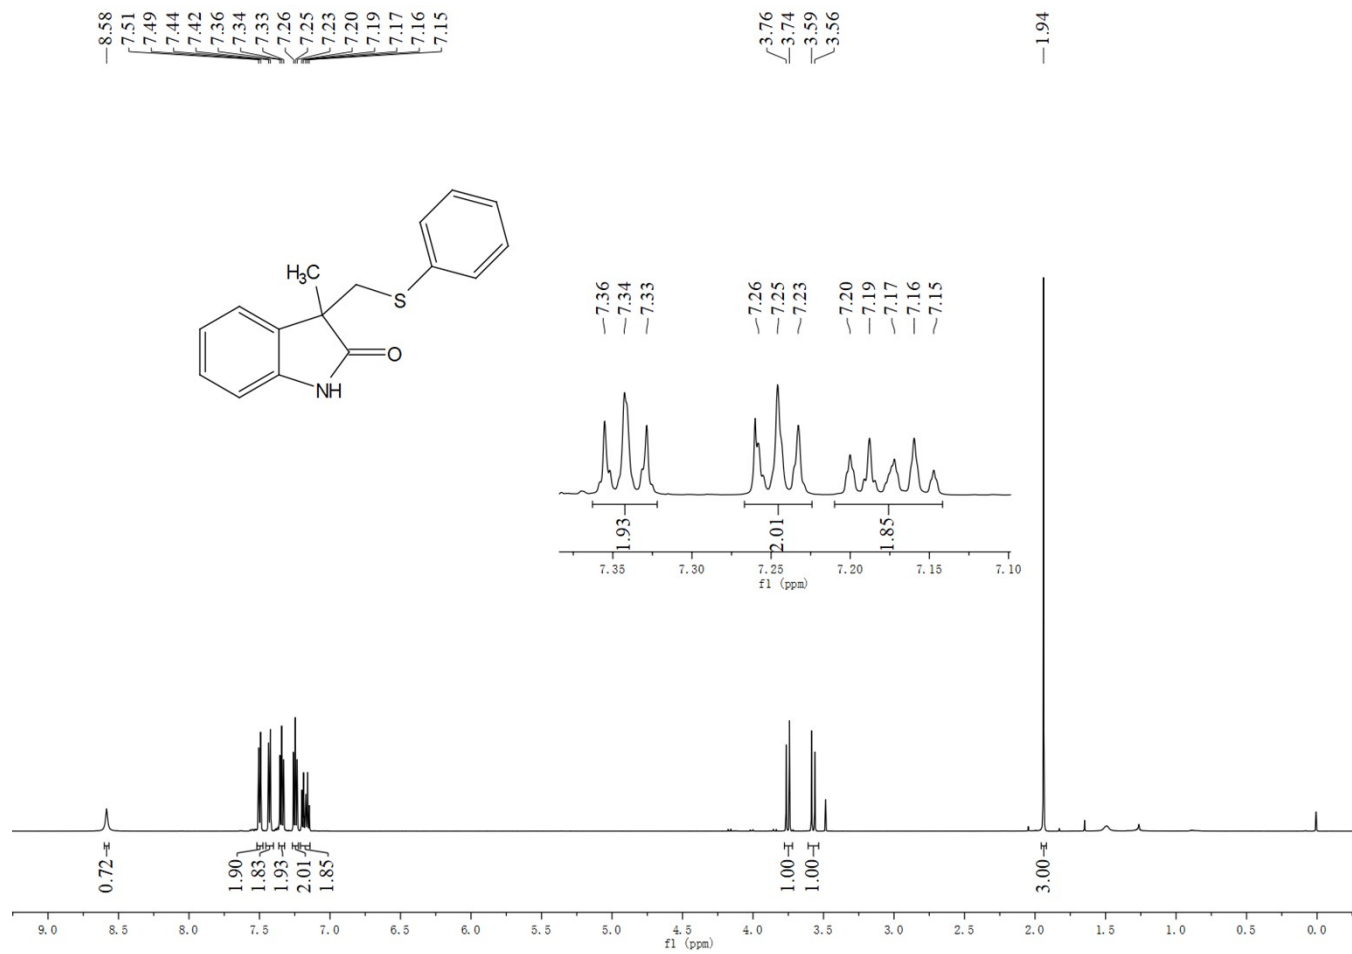

<sup>13</sup>C NMR (150 MHz, CDCl<sub>3</sub>)

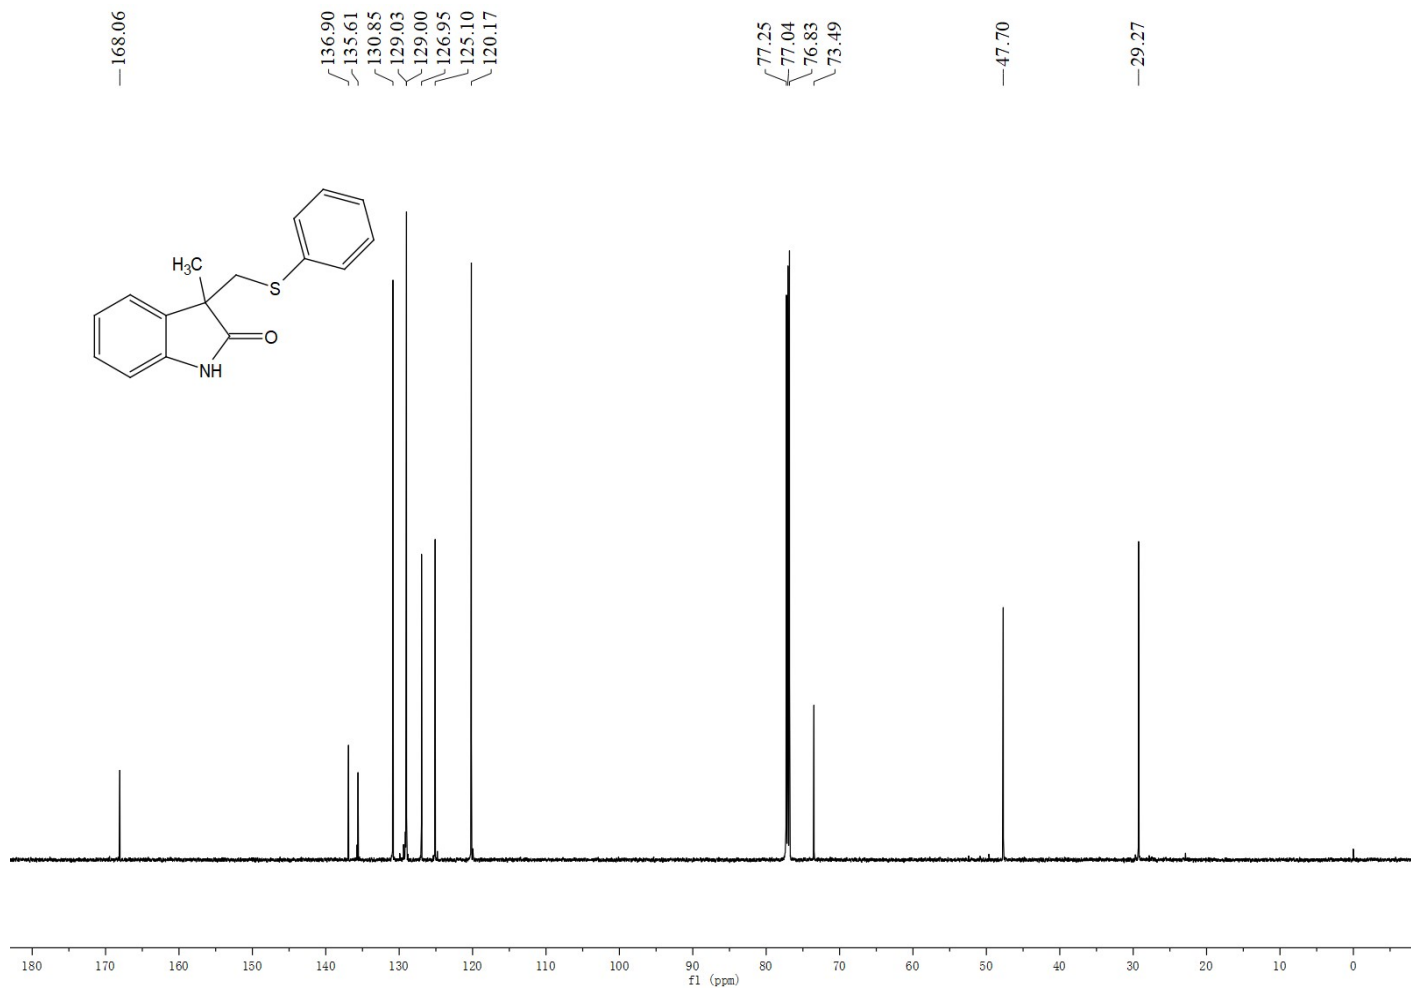

HRMS (ESI)

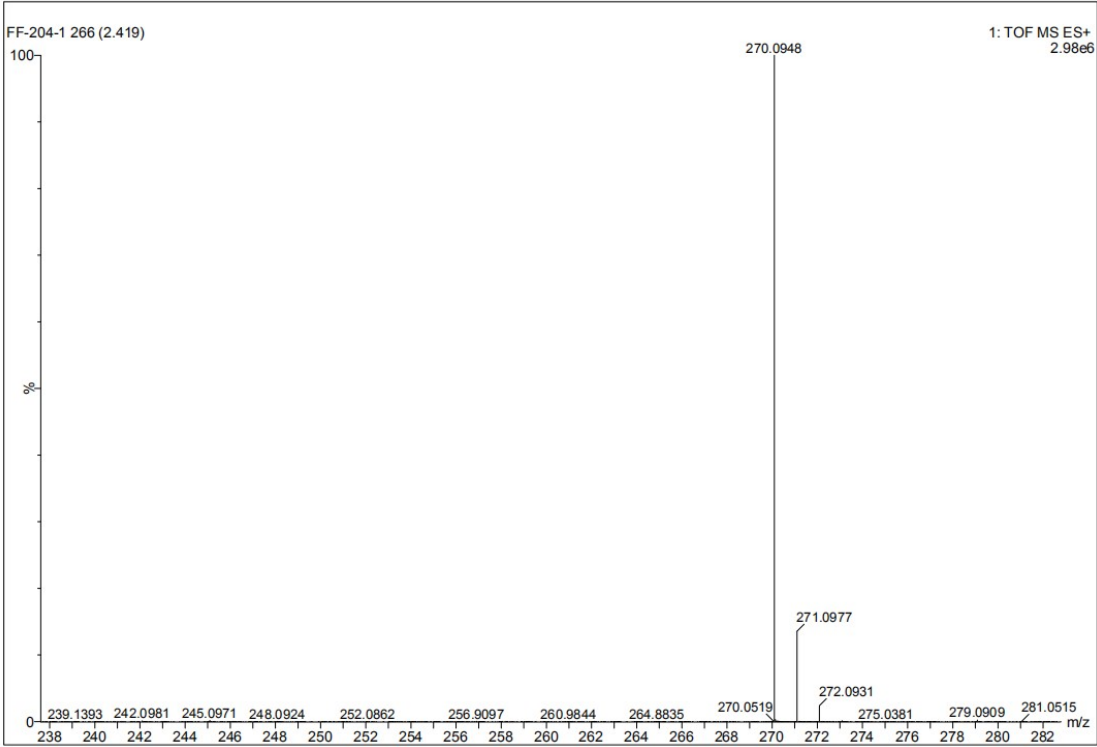

# 1-Benzyl-3-methyl-3-((phenylthio)methyl)indolin-2-one (3g)

<sup>1</sup>H NMR (600 MHz, CDCl<sub>3</sub>)

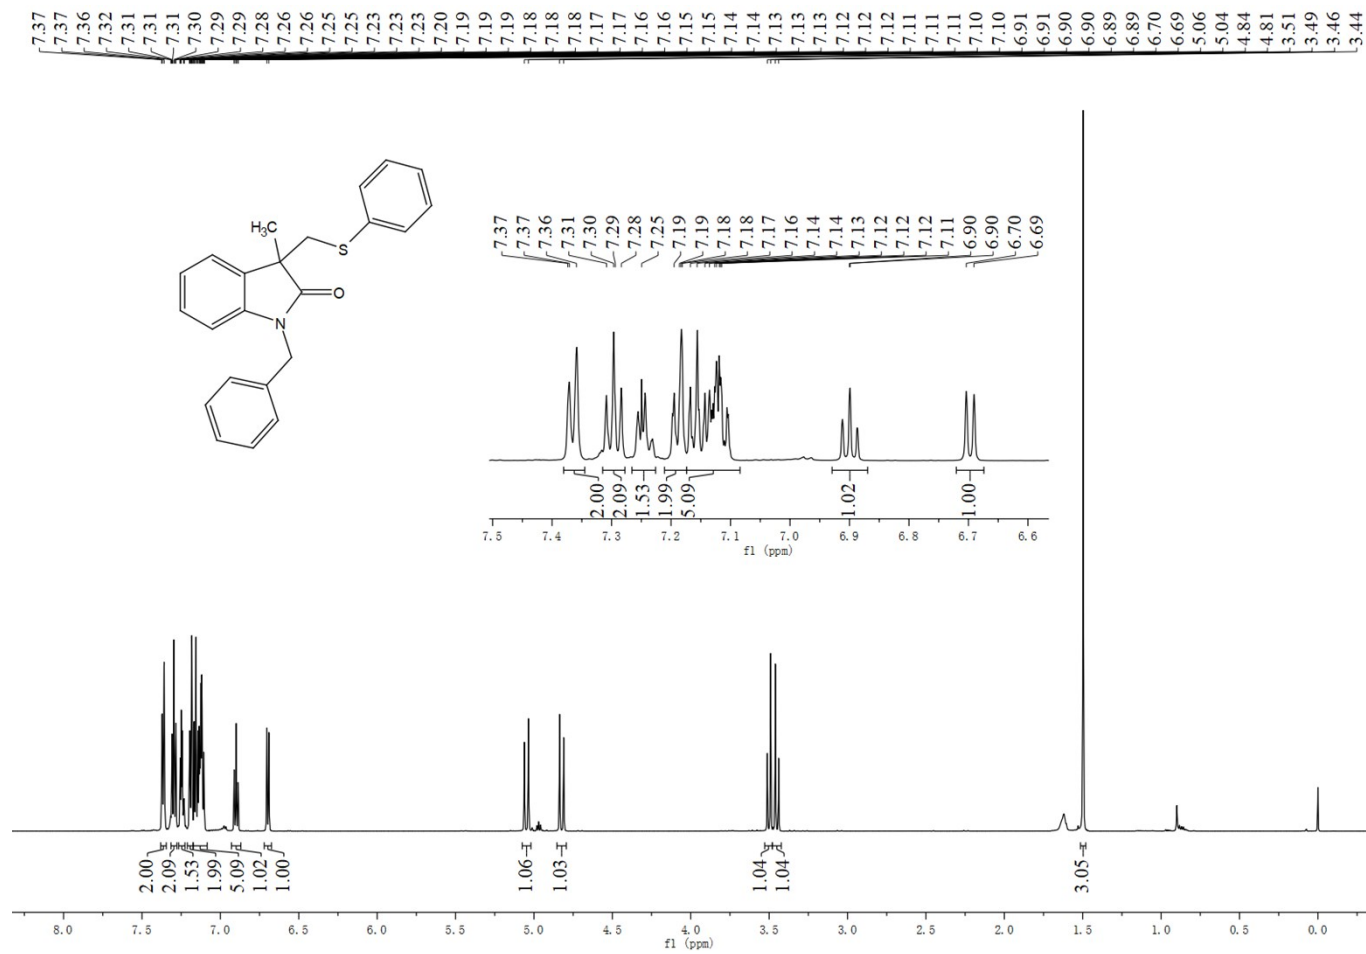

<sup>13</sup>C NMR (150 MHz, CDCl<sub>3</sub>)

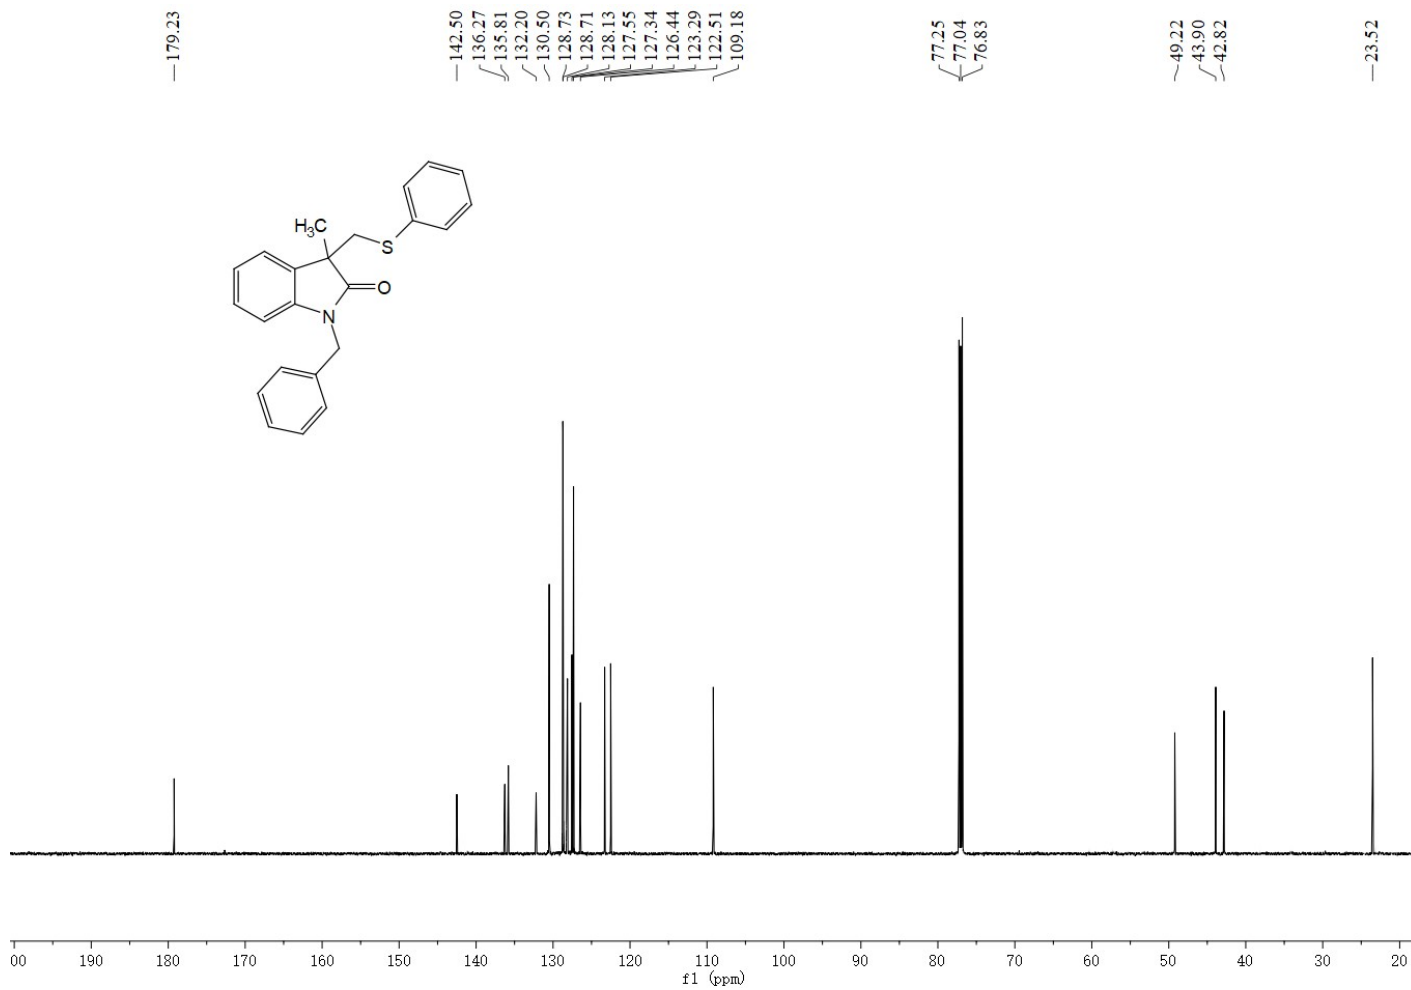

HRMS (ESI)

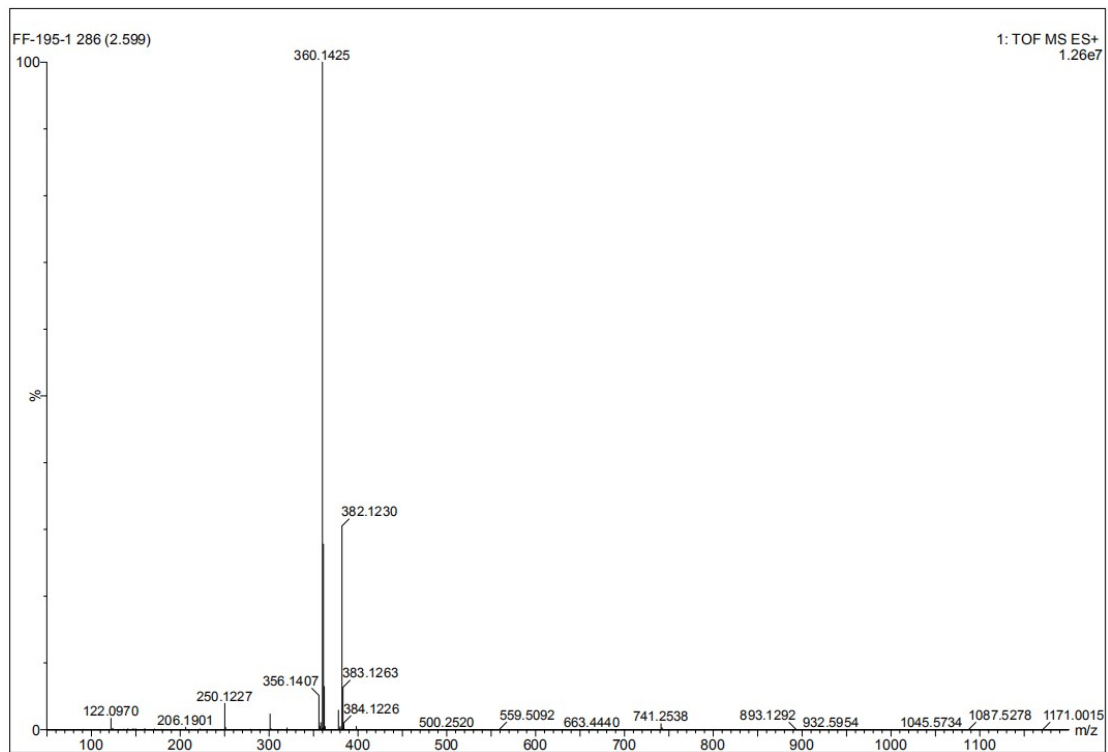

# 1,3,5-Trimethyl-3-((phenylthio)methyl)indolin-2-one (3h)

<sup>1</sup>H NMR (600 MHz, CDCl<sub>3</sub>)

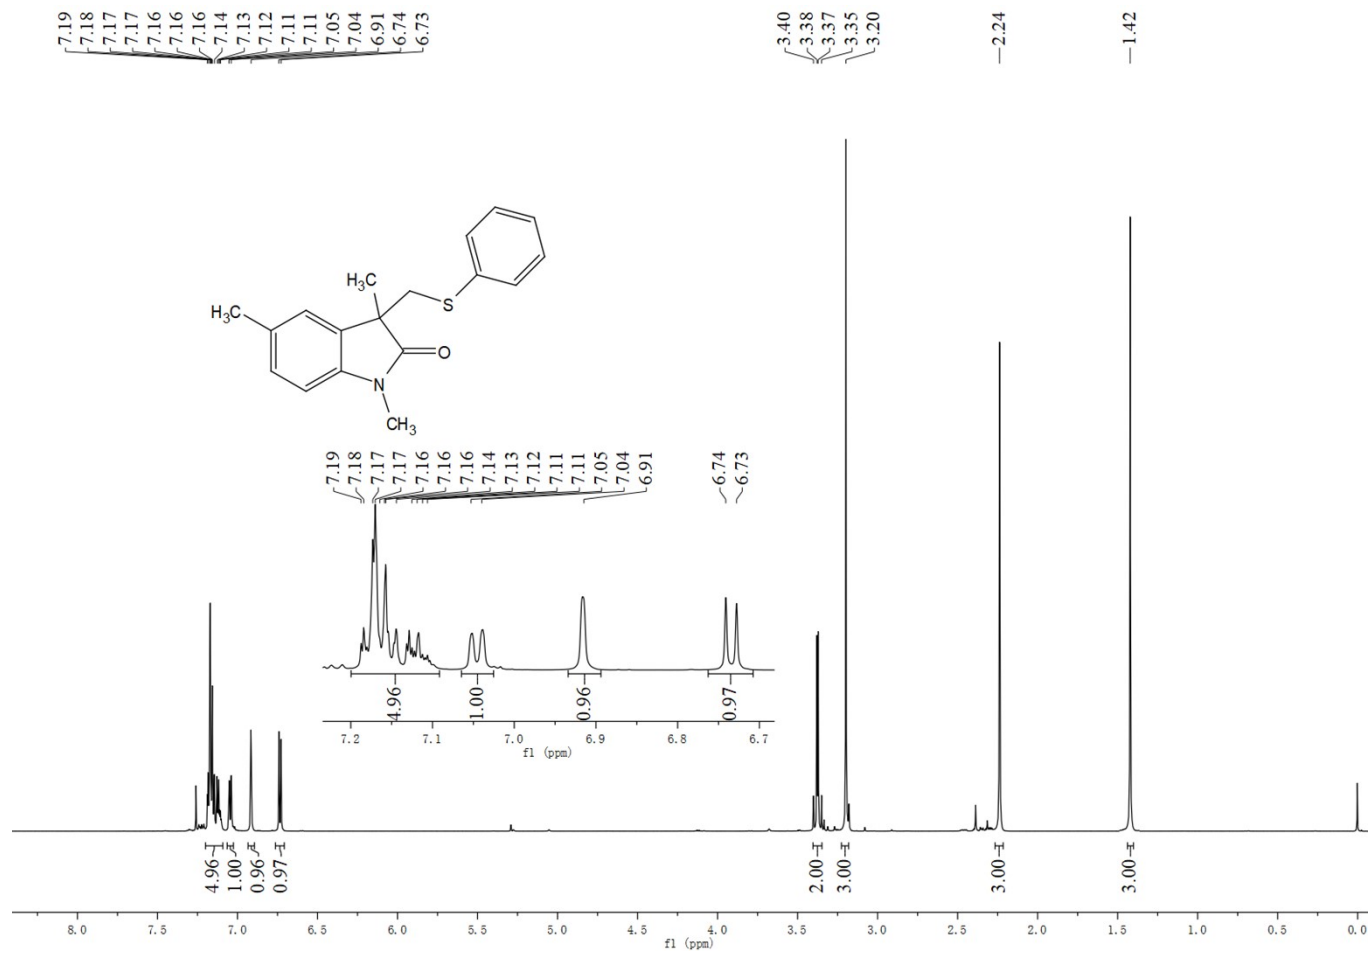

<sup>13</sup>C NMR (150 MHz, CDCl<sub>3</sub>)

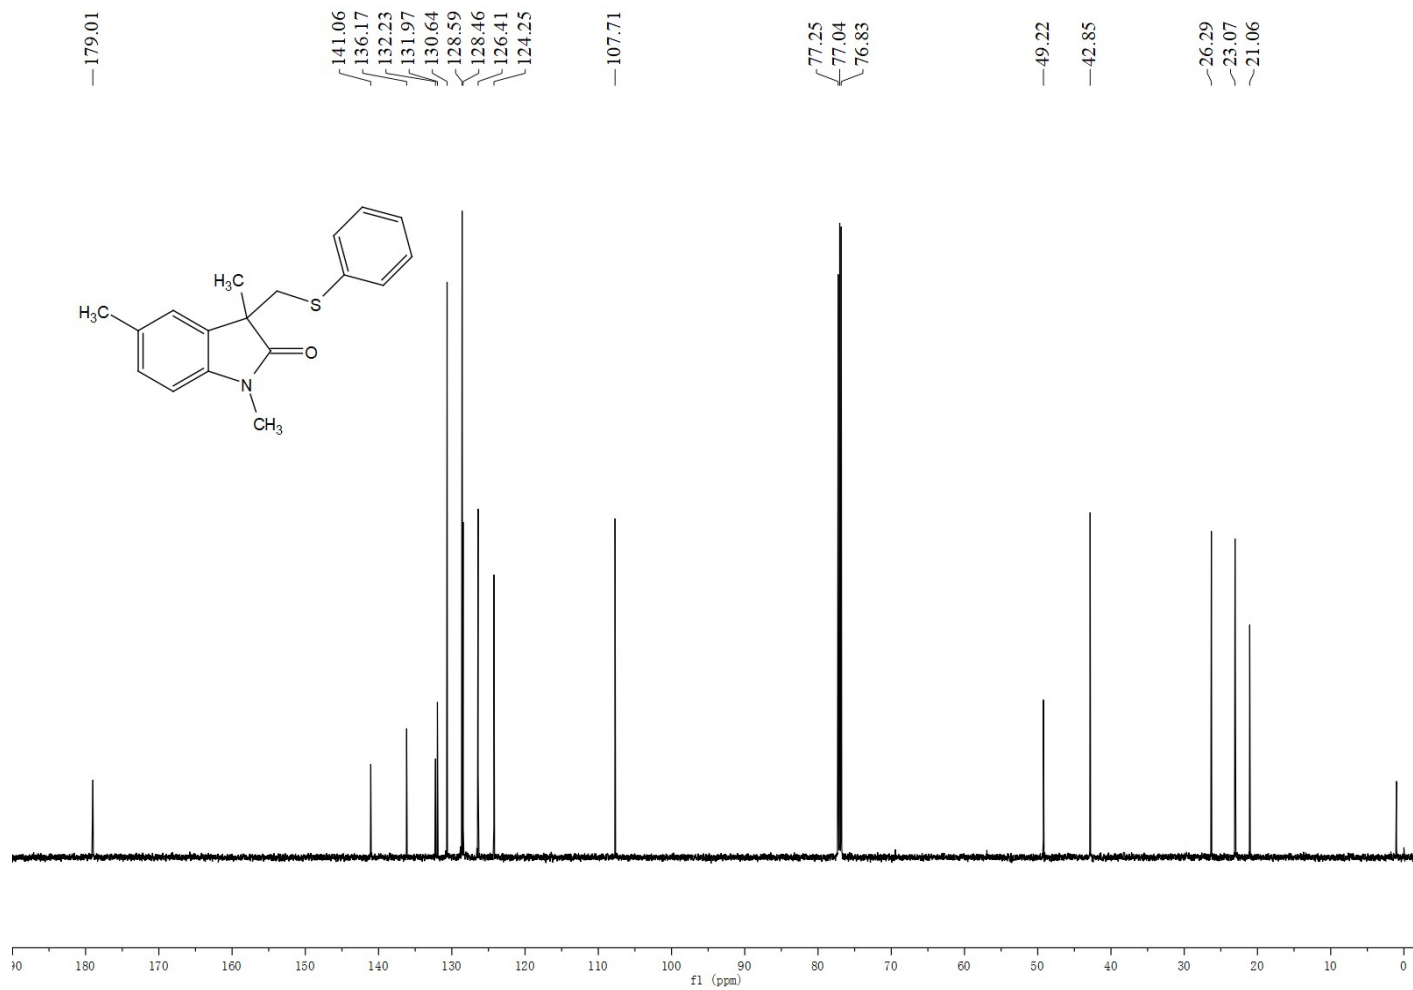



HRMS (ESI)

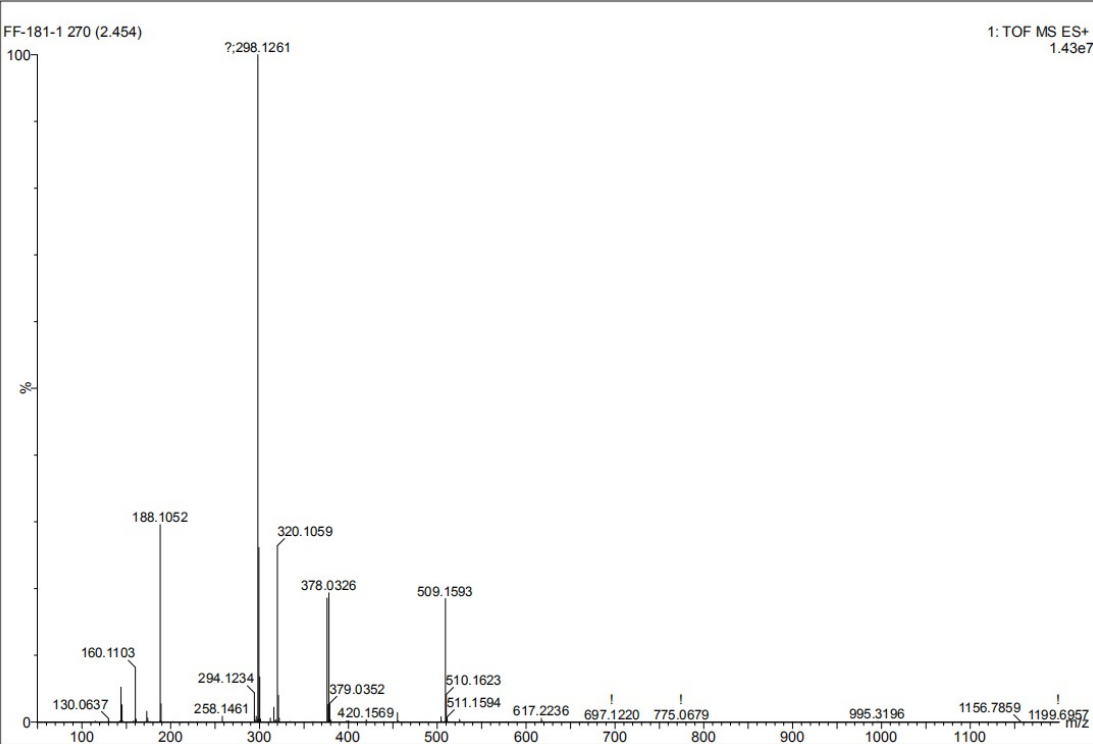

### 5-Methoxy-1,3-dimethyl-3-((phenylthio)methyl)indolin-2-one (3i)

<sup>1</sup>H NMR (600 MHz, CDCl<sub>3</sub>)

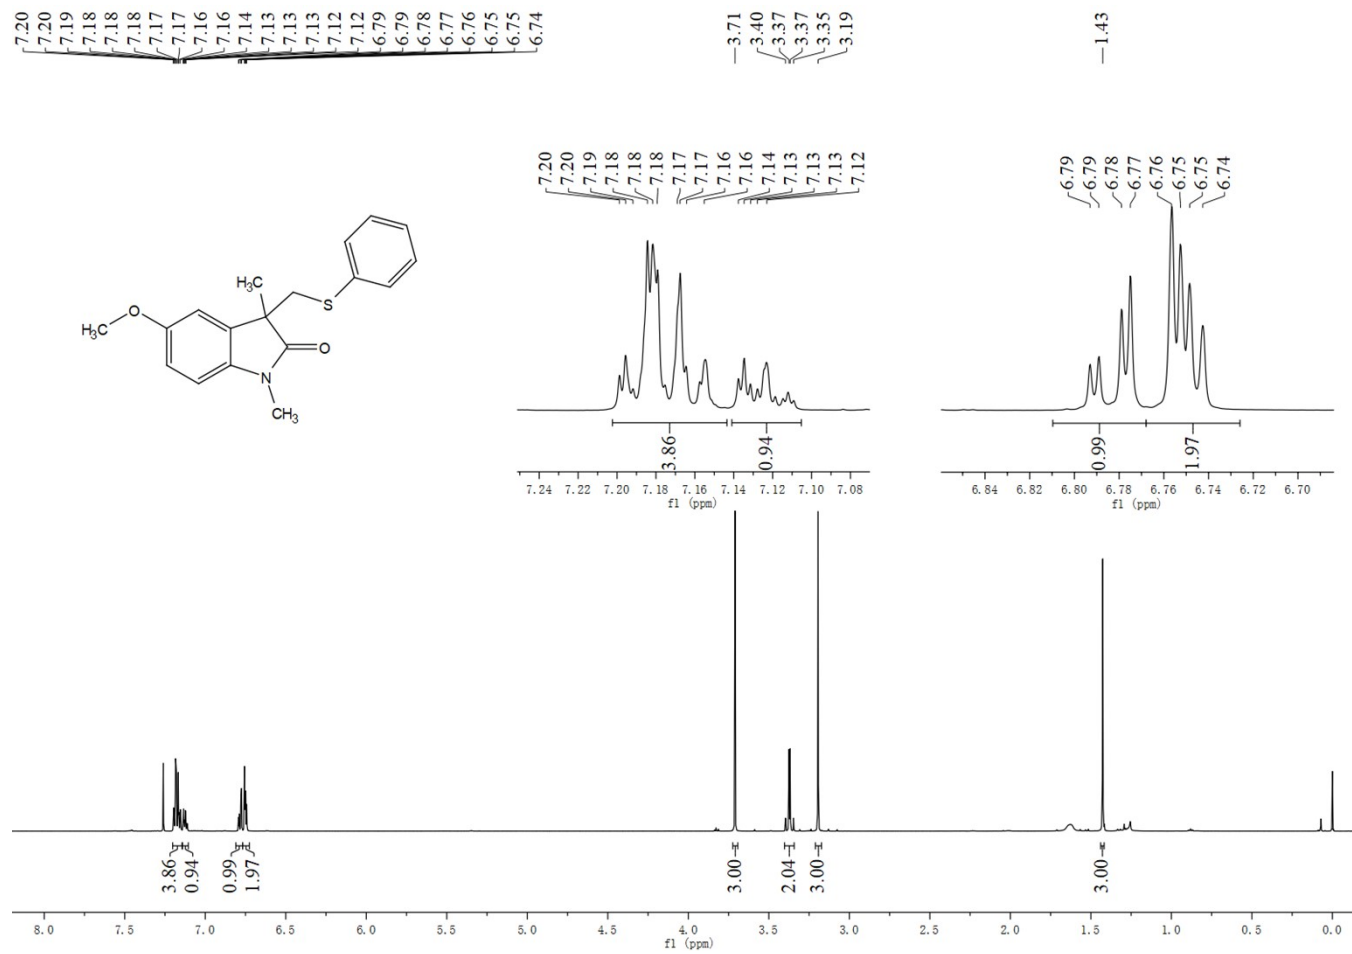

<sup>13</sup>C NMR (150 MHz, CDCl<sub>3</sub>)

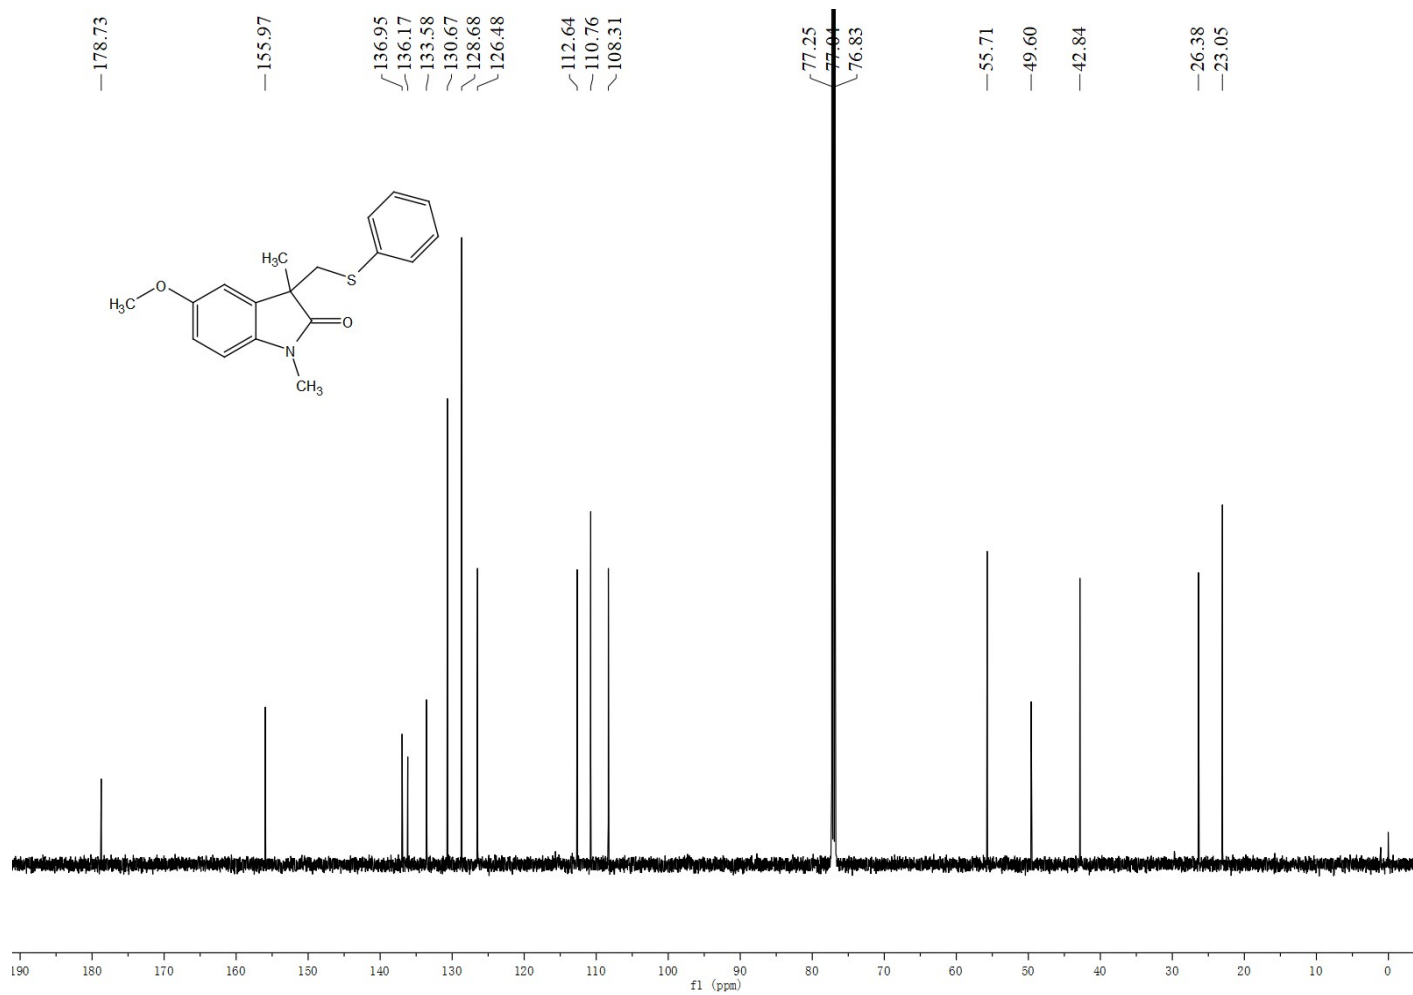

HRMS (ESI)

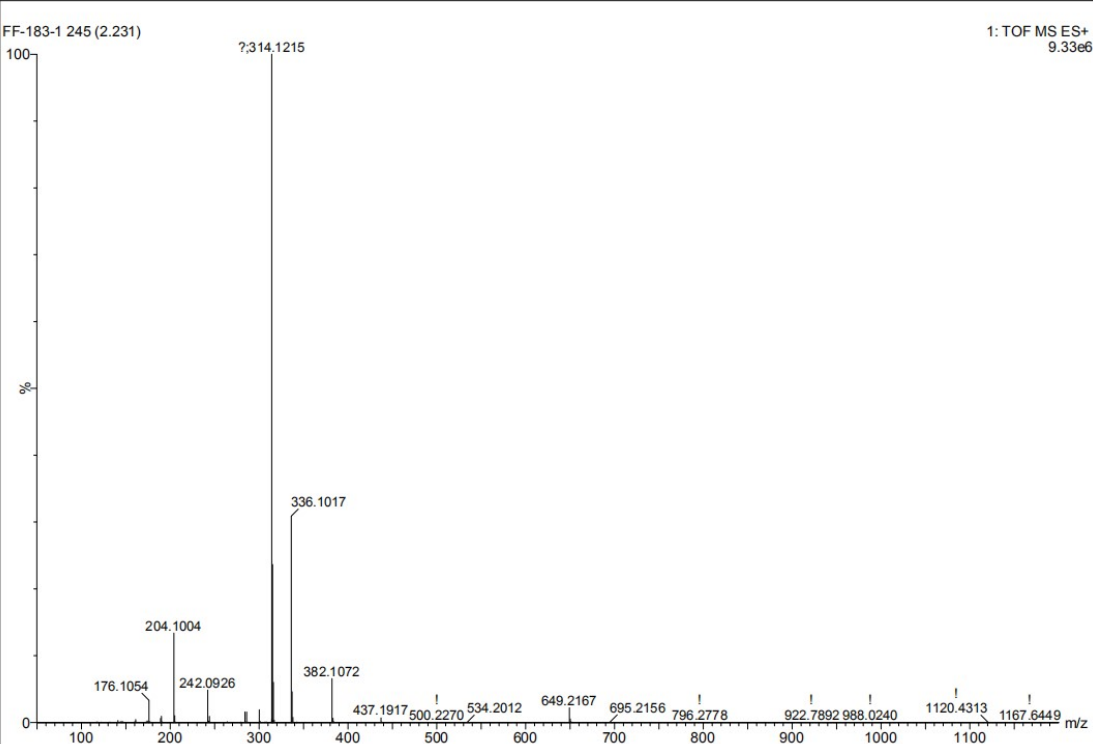

### 5-Isopropyl-1,3-dimethyl-3-((phenylthio)methyl)indolin-2-one (3j)

$^1\text{H}$  NMR (600 MHz,  $\text{CDCl}_3$ )

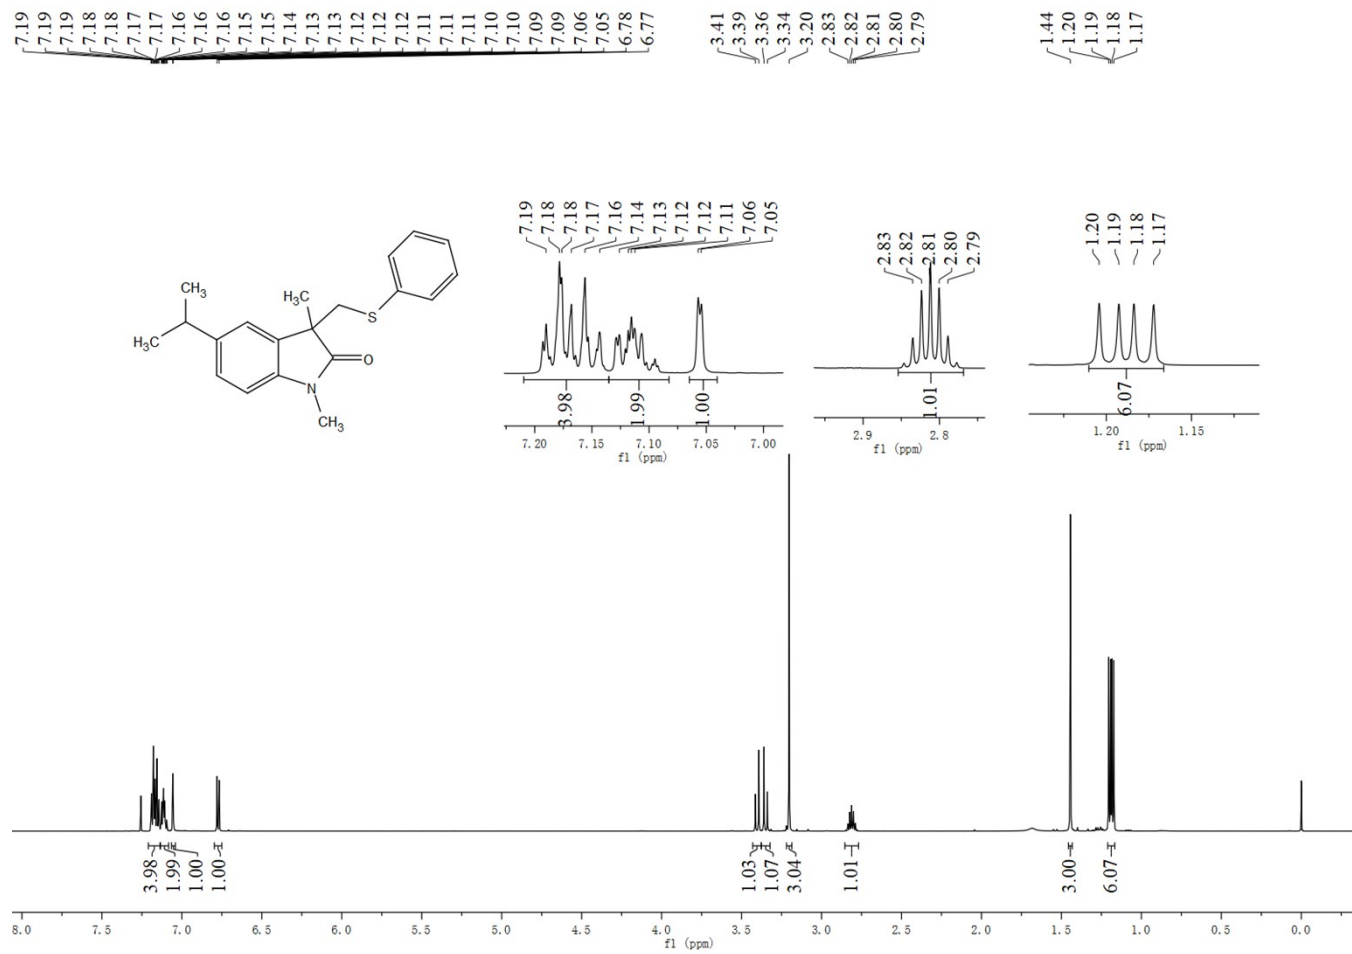

$^{13}\text{C}$  NMR (150 MHz,  $\text{CDCl}_3$ )

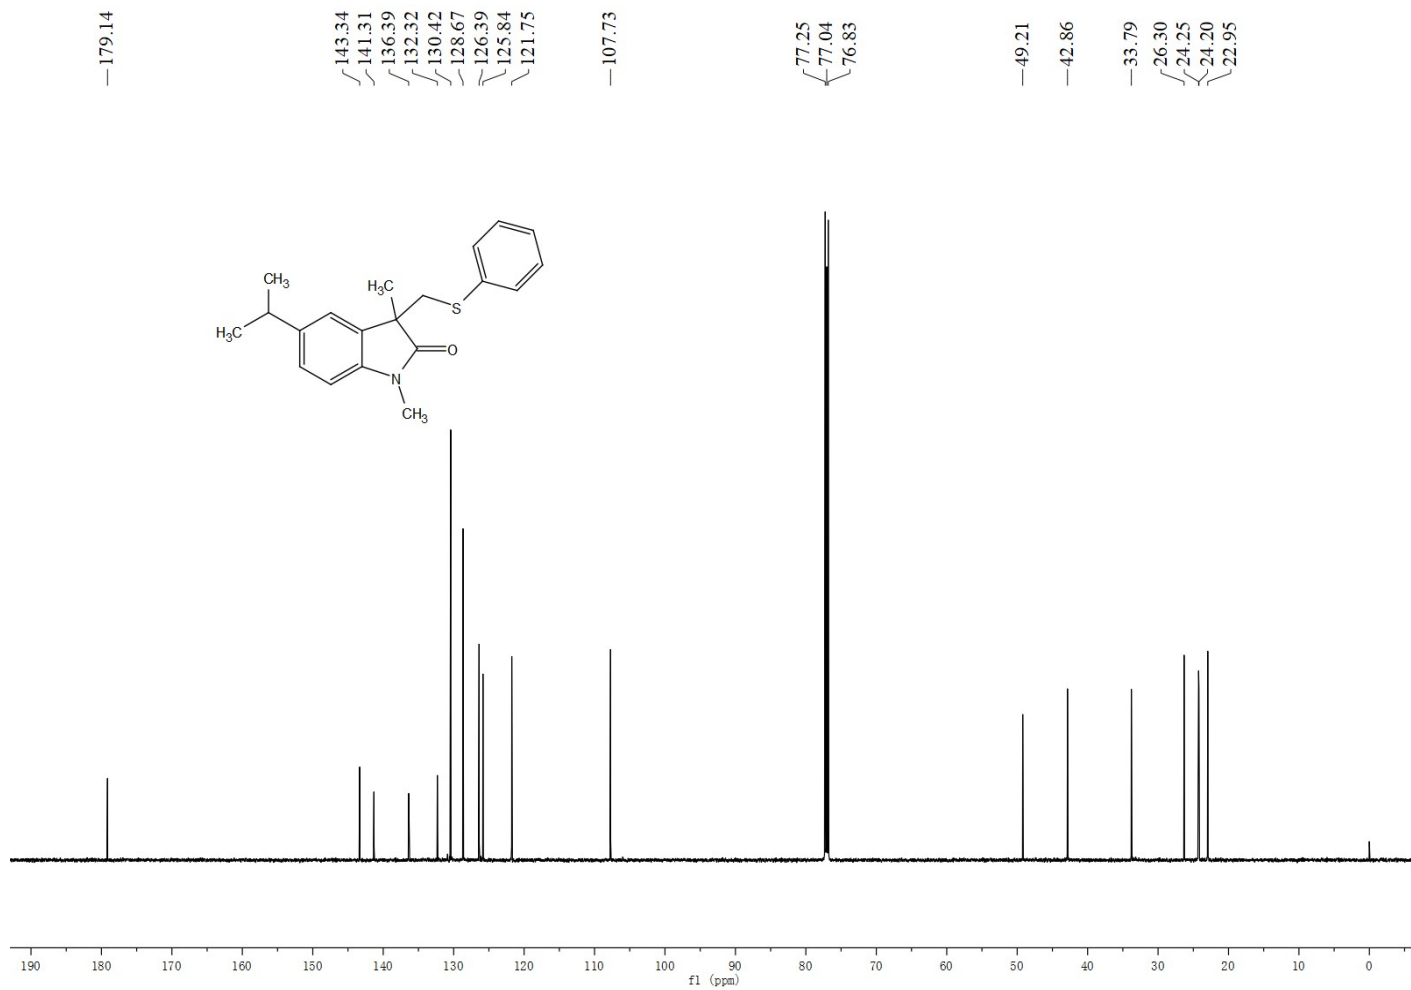

# HRMS (ESI)

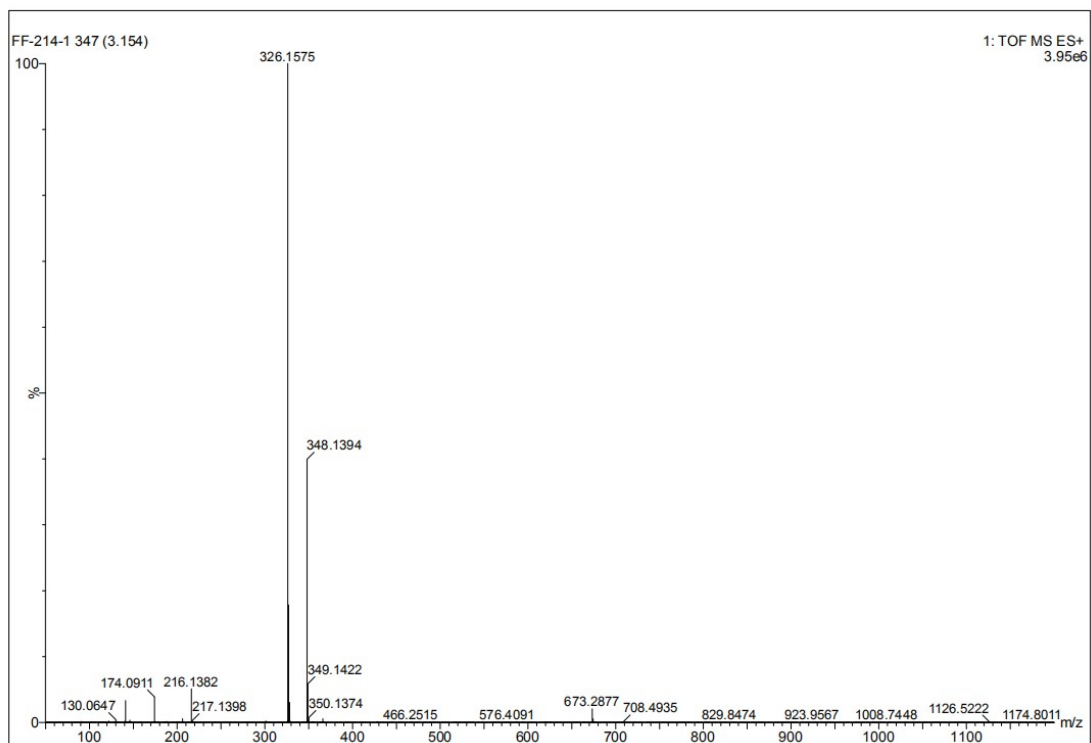

### 5-Fluoro-1,3-dimethyl-3-((phenylthio)methyl)indolin-2-one (3k)

<sup>1</sup>H NMR (600 MHz, CDCl<sub>3</sub>)

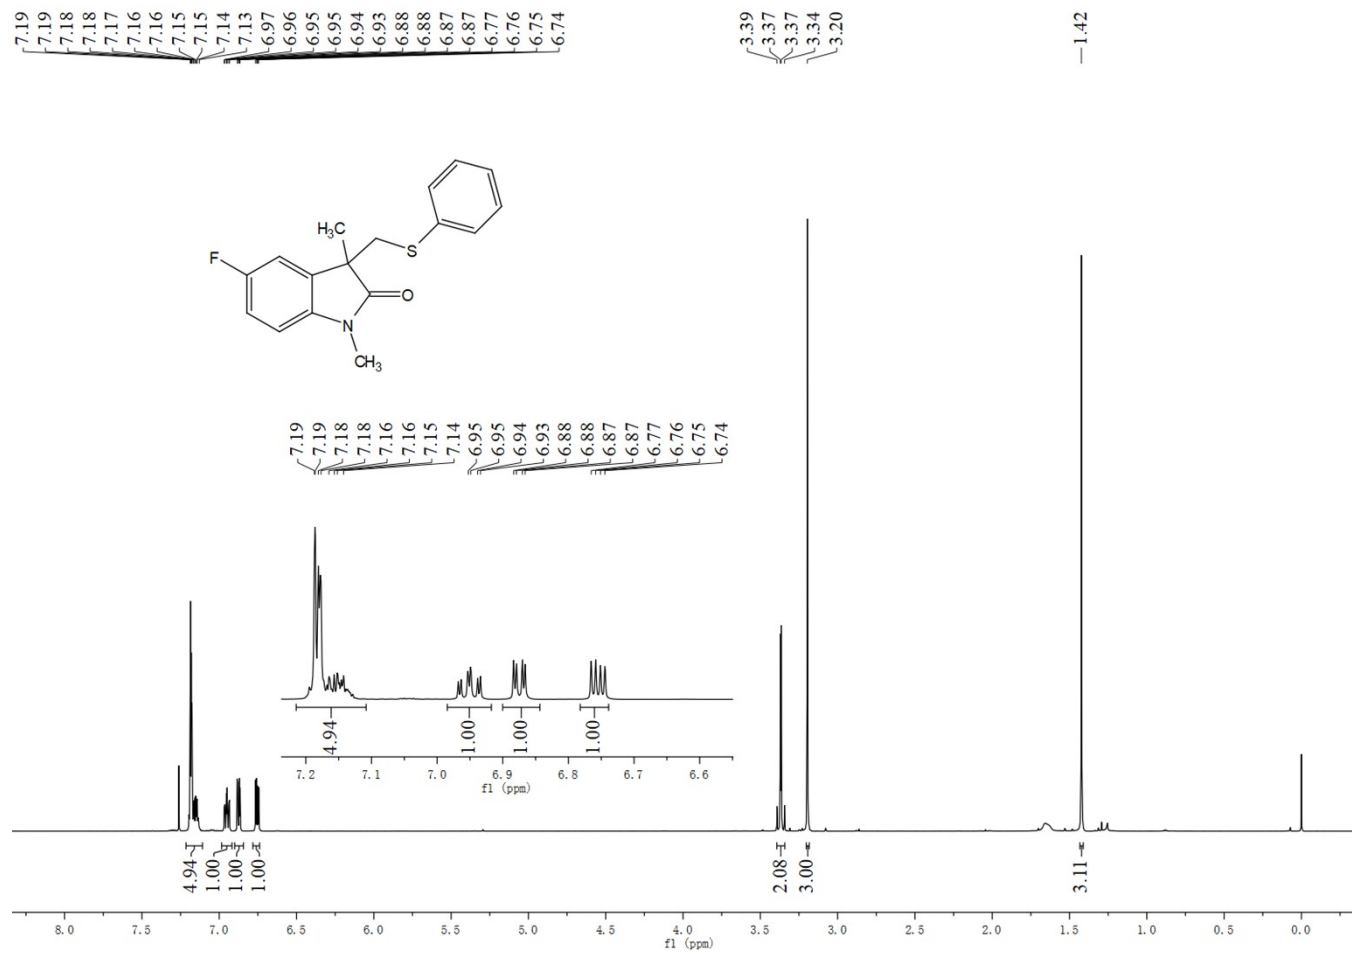



$^{13}\text{C}$  NMR (150 MHz,  $\text{CDCl}_3$ )

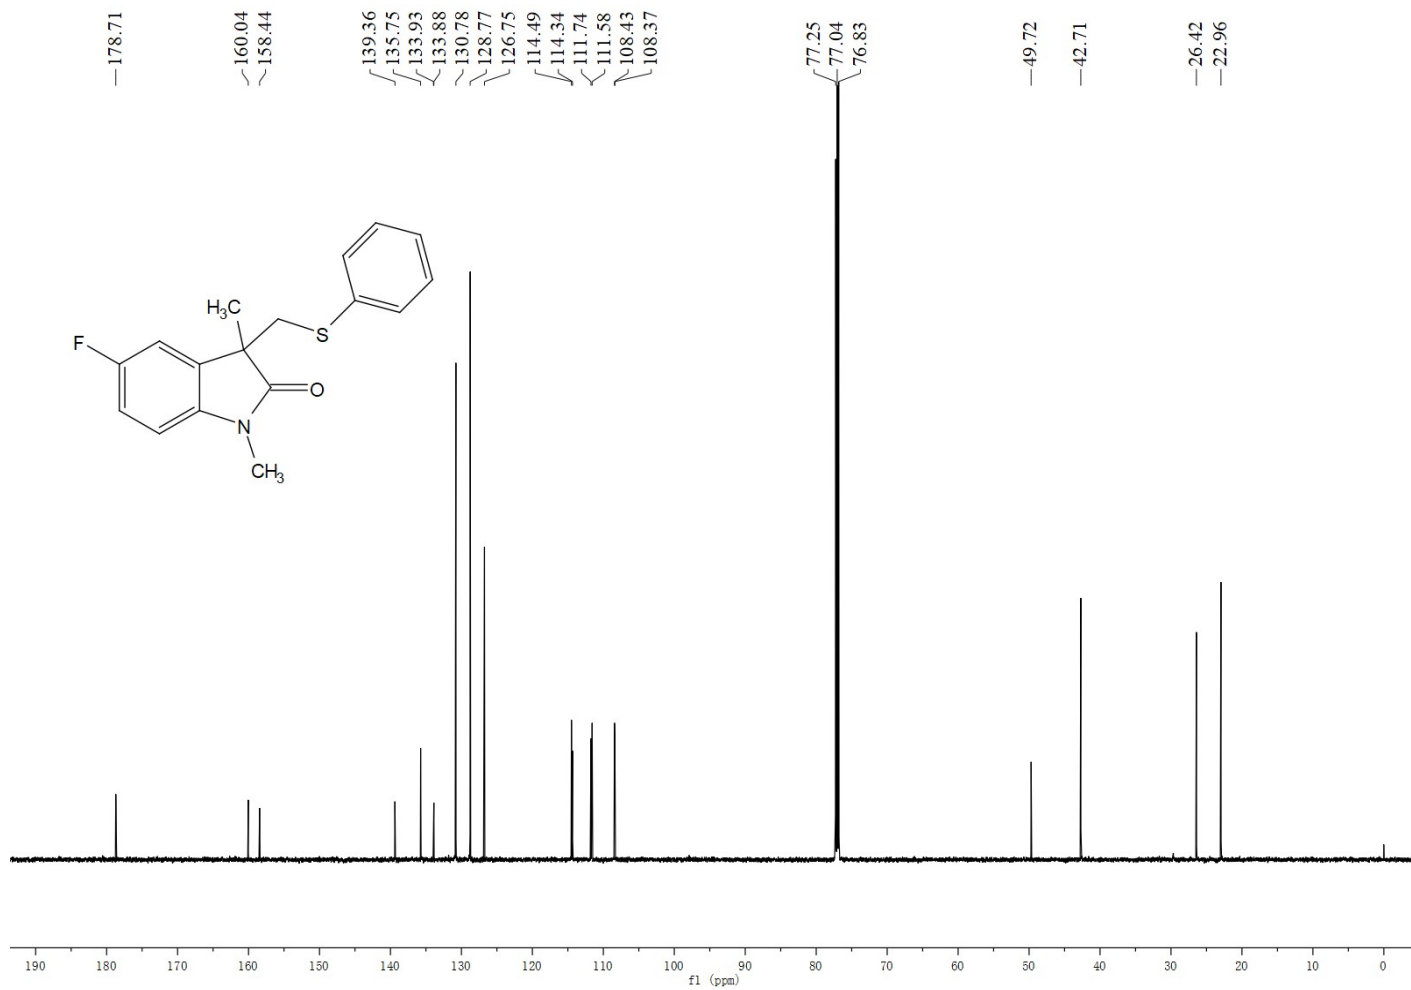

$^{19}\text{F}$  NMR (565 MHz,  $\text{CDCl}_3$ )

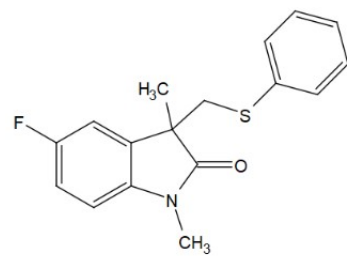

-115.20

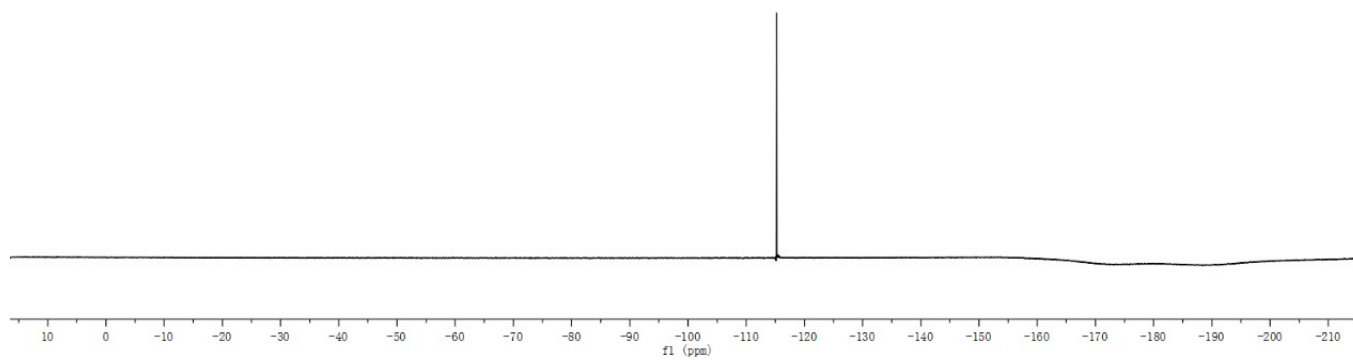

HRMS (ESI)

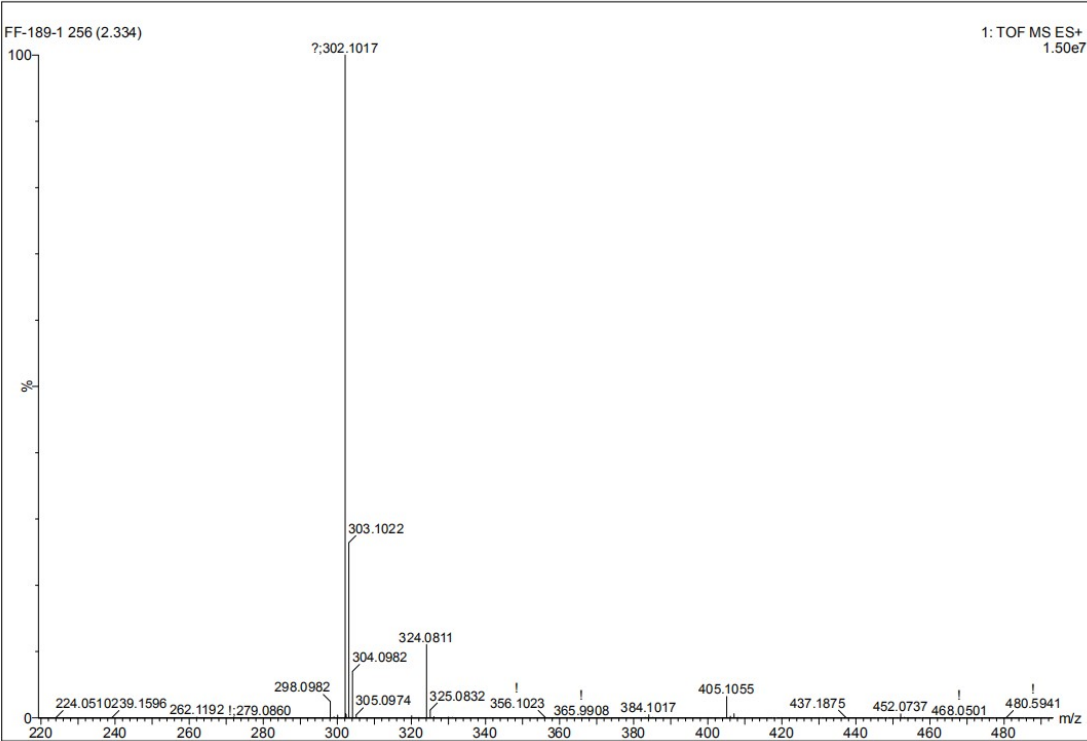

### 5-Chloro-1,3-dimethyl-3-((phenylthio)methyl)indolin-2-one (3I)

$^1\text{H}$  NMR (600 MHz,  $\text{CDCl}_3$ )

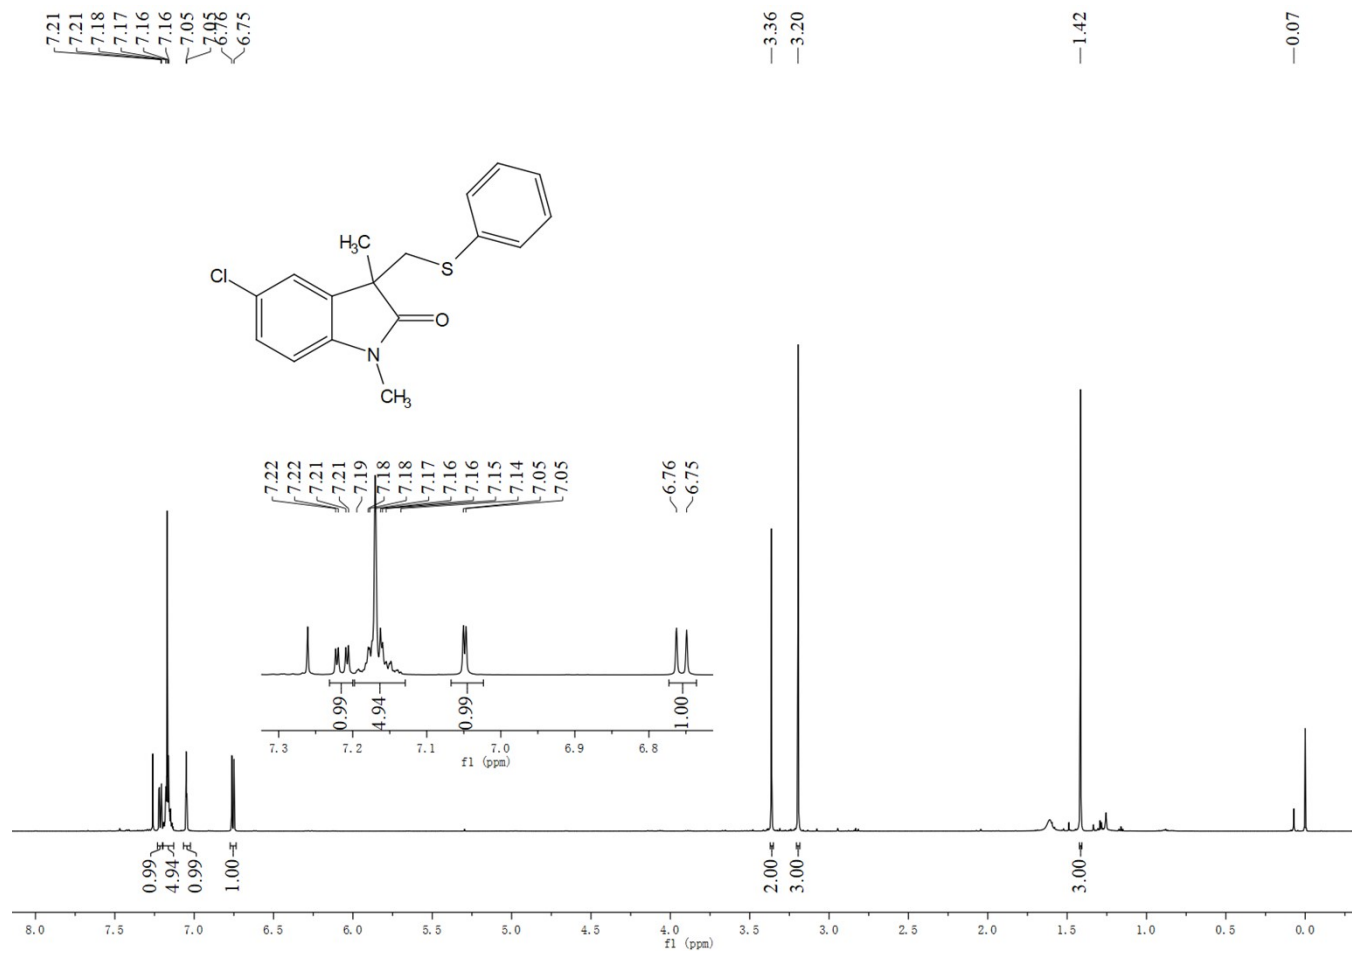

<sup>13</sup>C NMR (150 MHz, CDCl<sub>3</sub>)

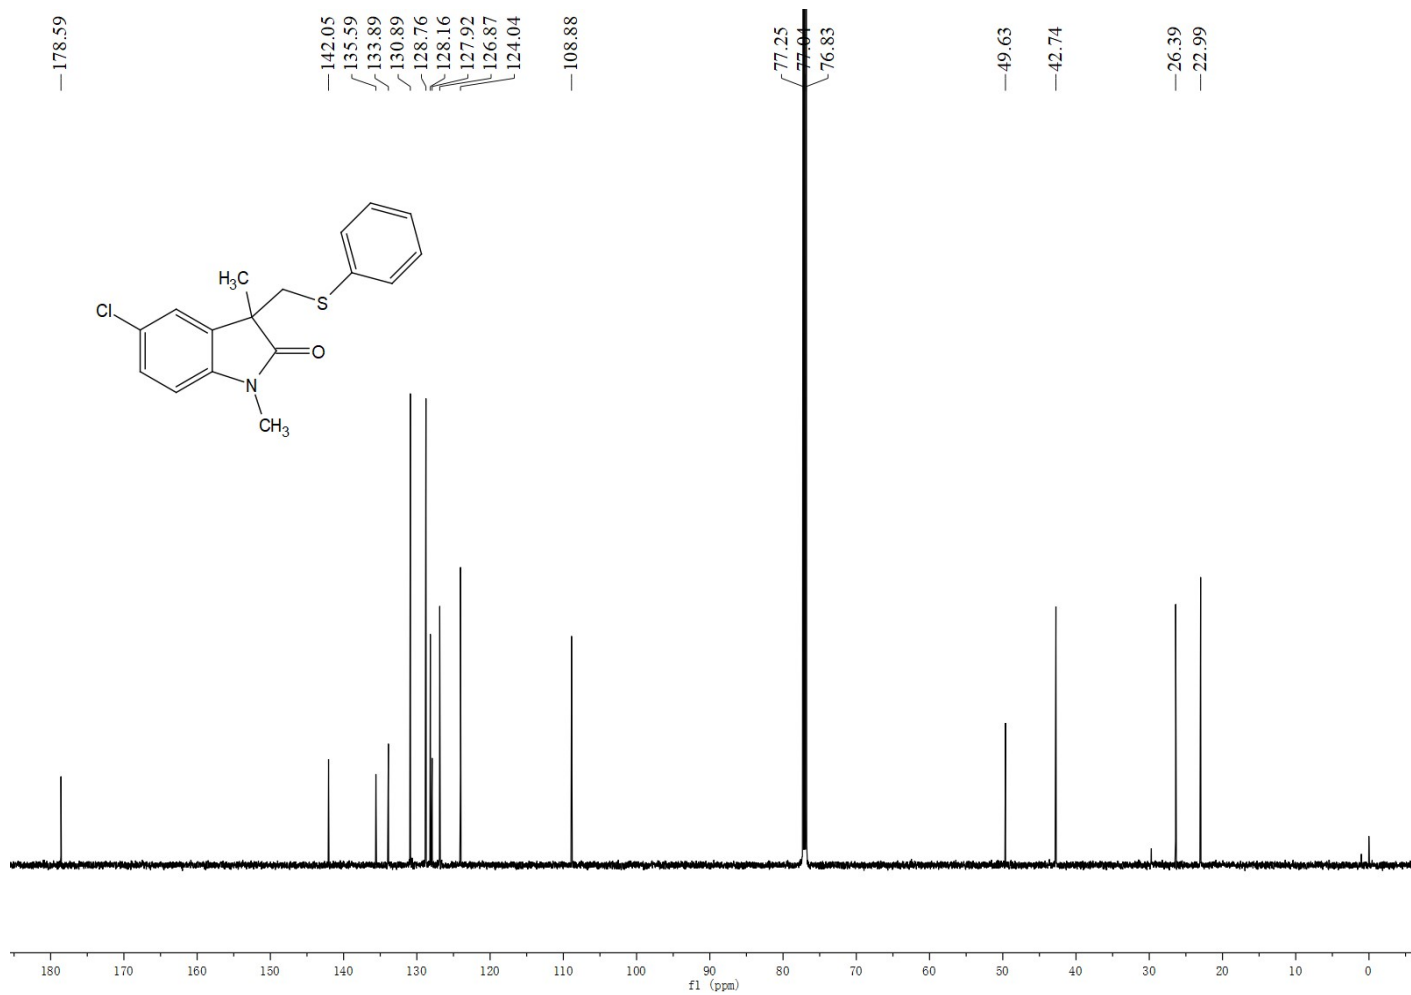

# HRMS (ESI)

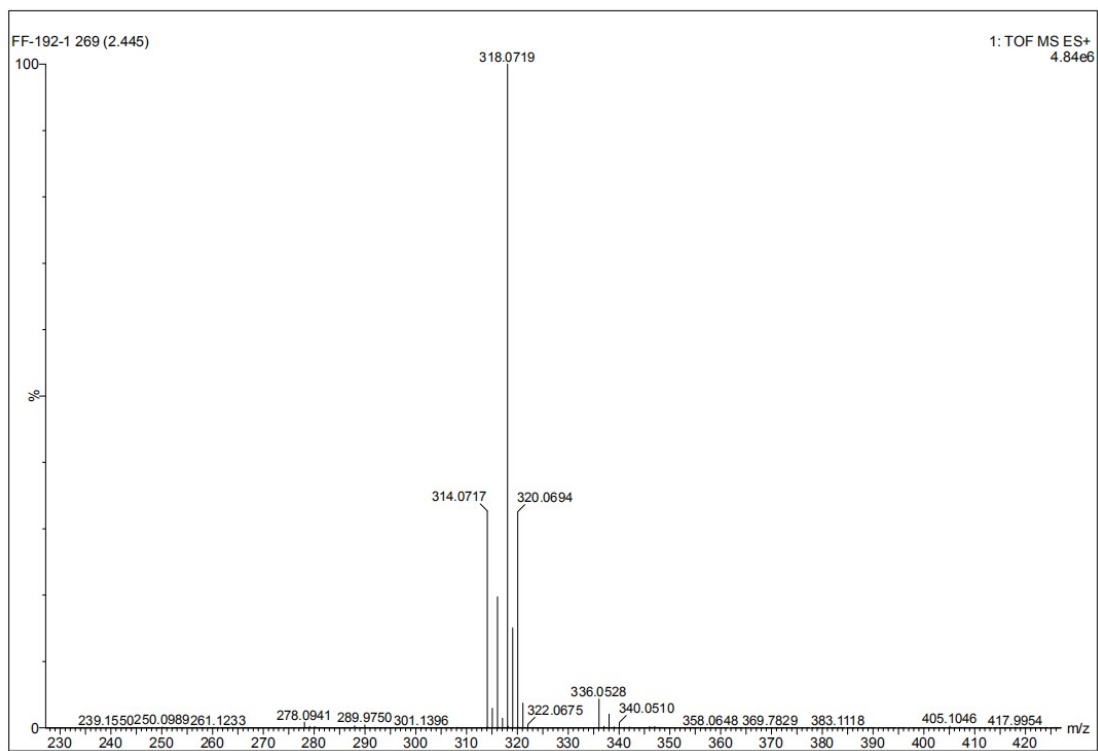

**5-Bromo-1,3-dimethyl-3-((phenylthio)methyl)indolin-2-one (3m)**

$^1\text{H}$  NMR (400 MHz,  $\text{CDCl}_3$ )

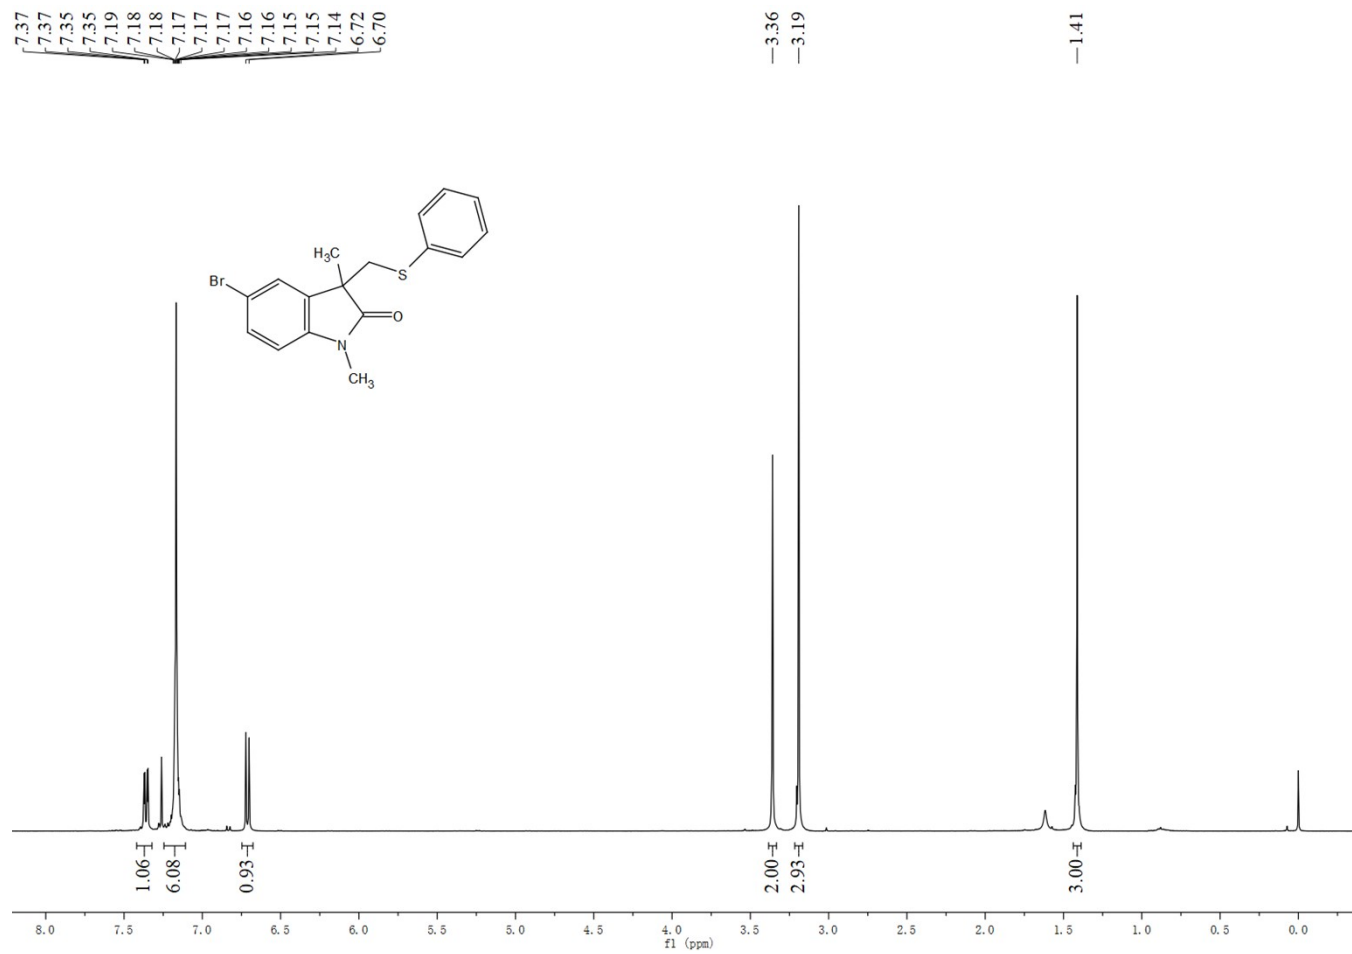

$^{13}\text{C}$  NMR (100 MHz,  $\text{CDCl}_3$ )

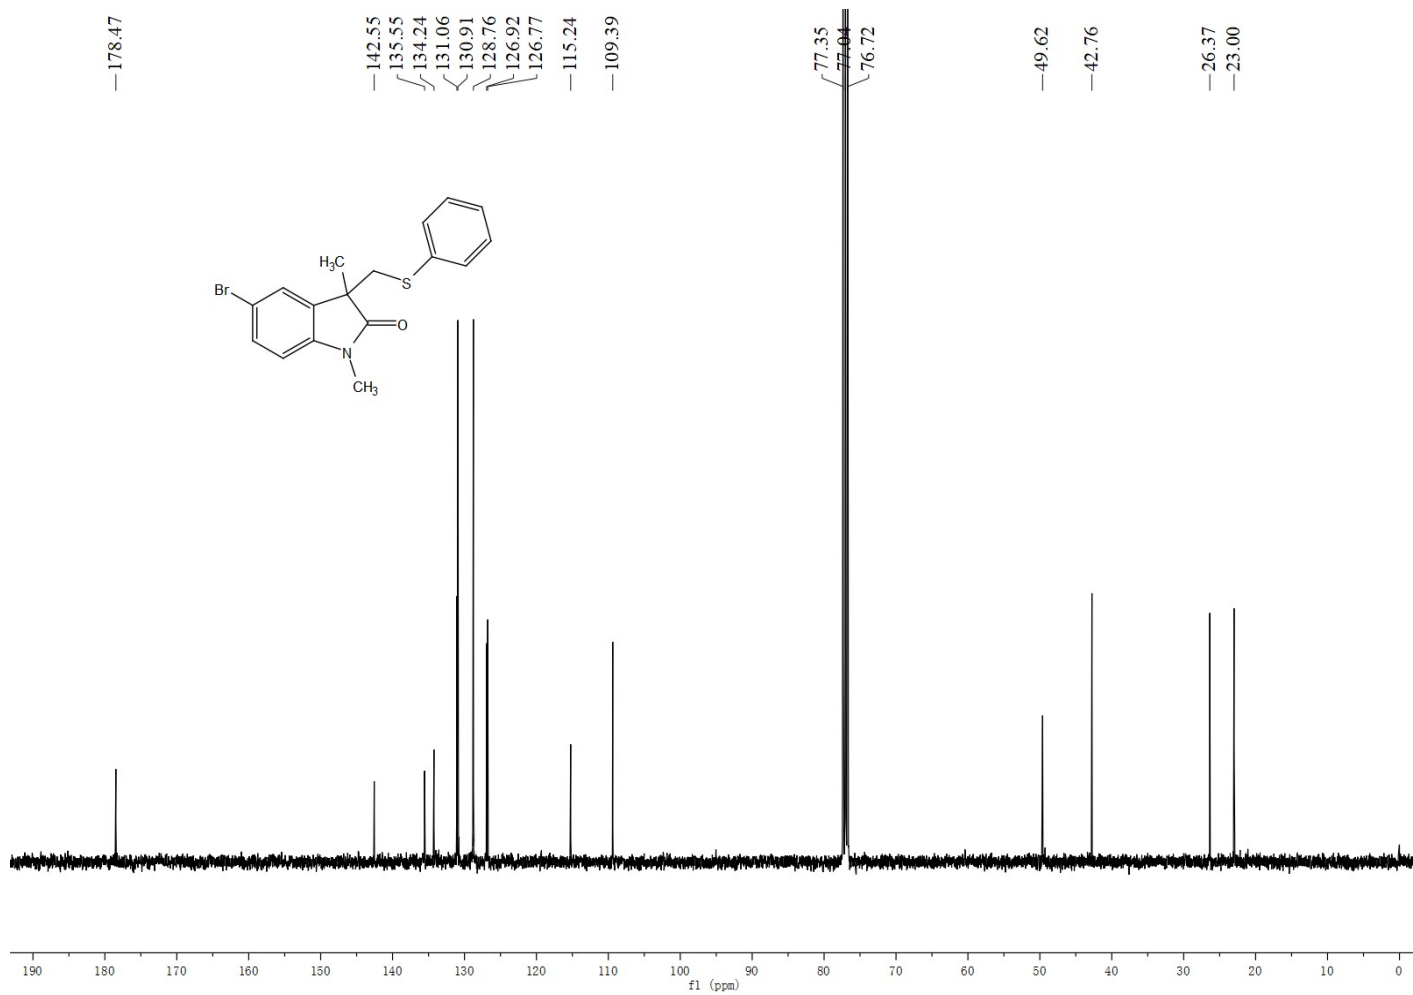



HRMS (ESI)

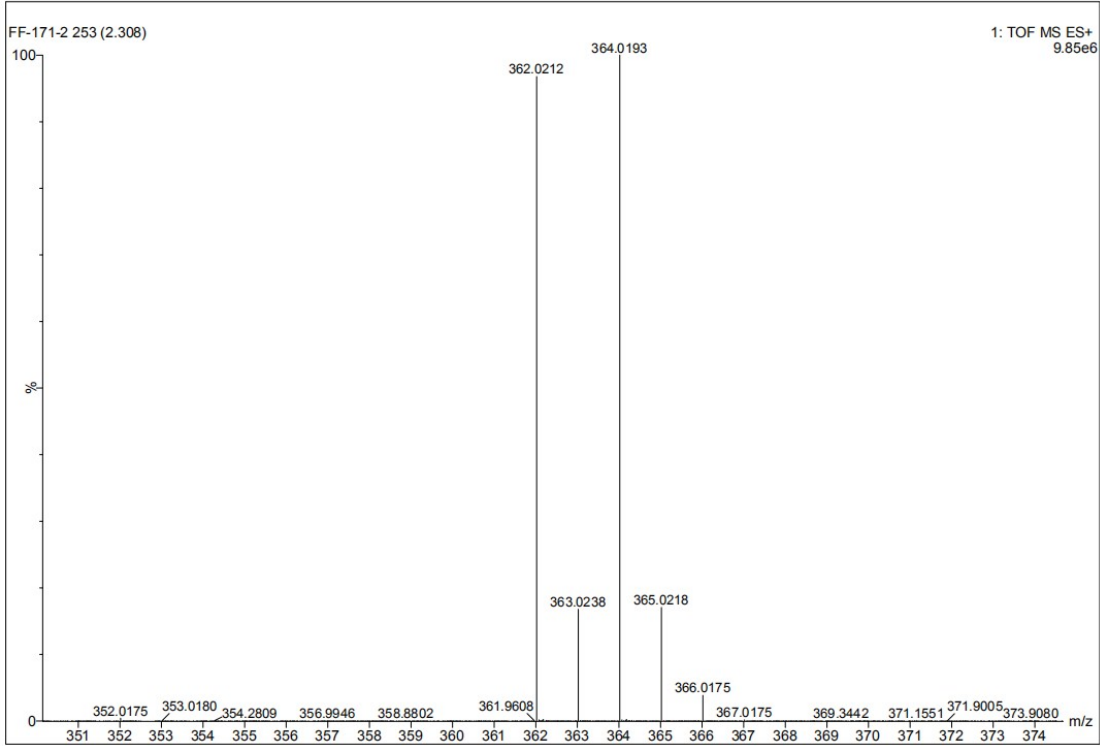

# 1,3-Dimethyl-5-phenyl-3-((phenylthio)methyl)indolin-2-one (3n)

$^1\text{H}$  NMR (600 MHz,  $\text{CDCl}_3$ )

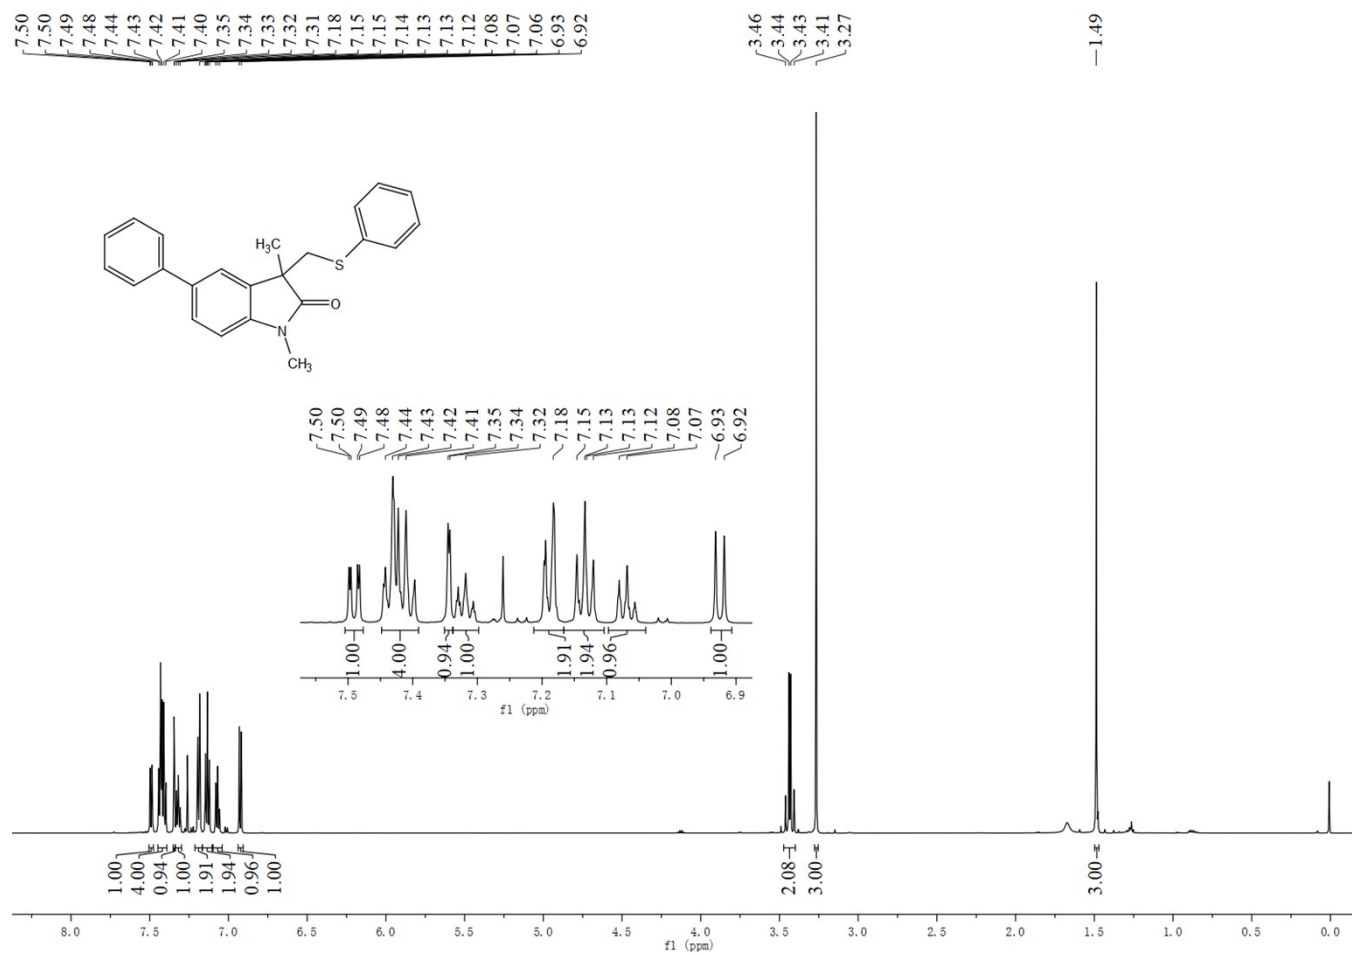

<sup>13</sup>C NMR (150 MHz, CDCl<sub>3</sub>)

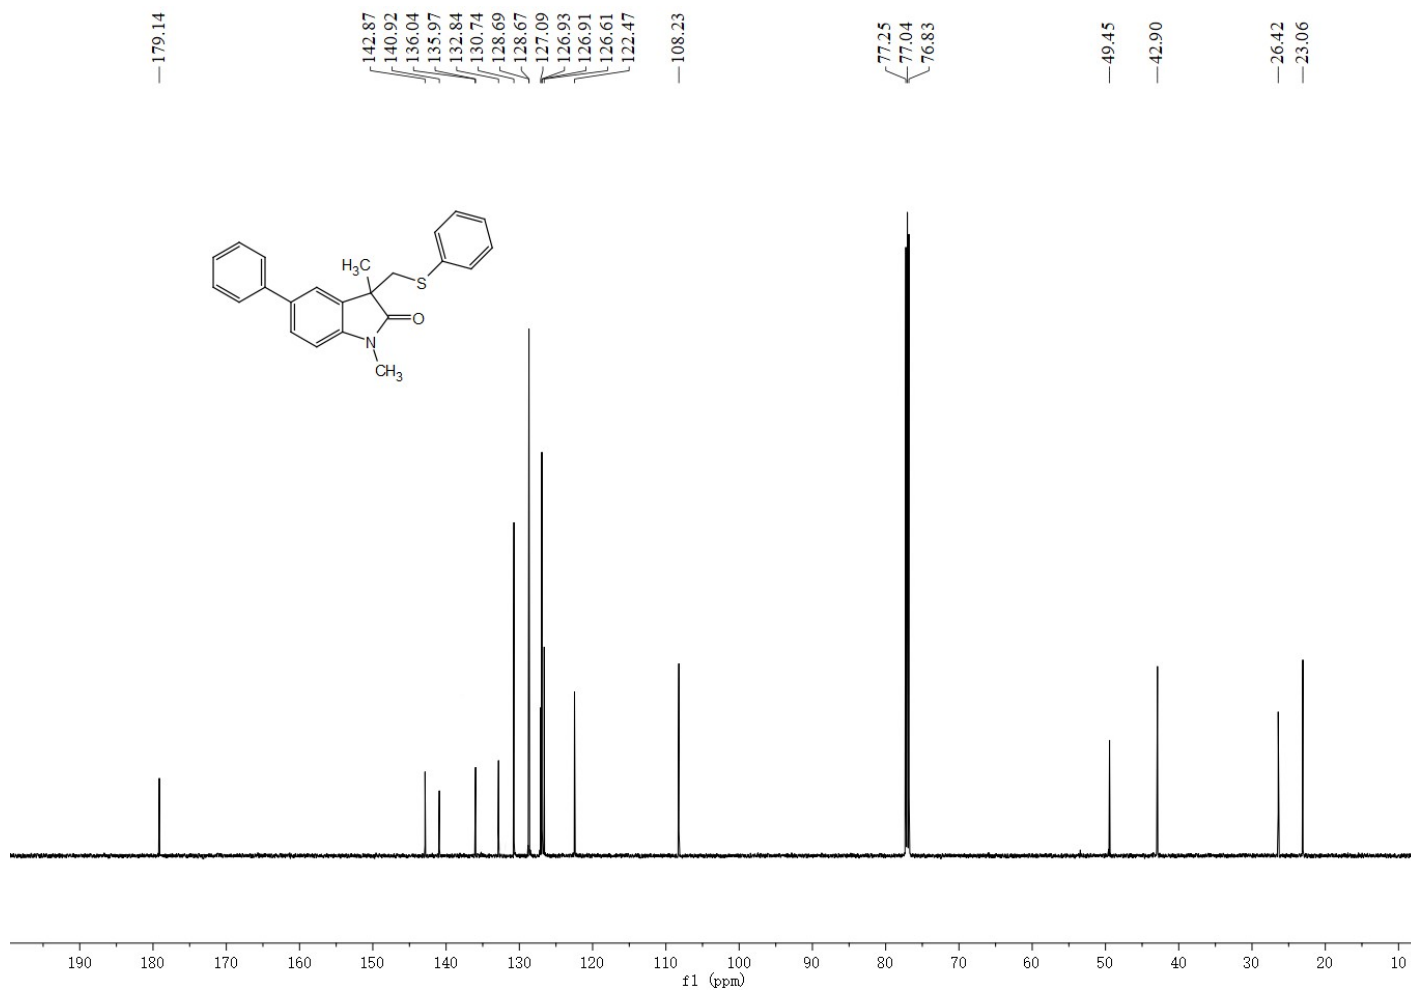

HRMS (ESI)

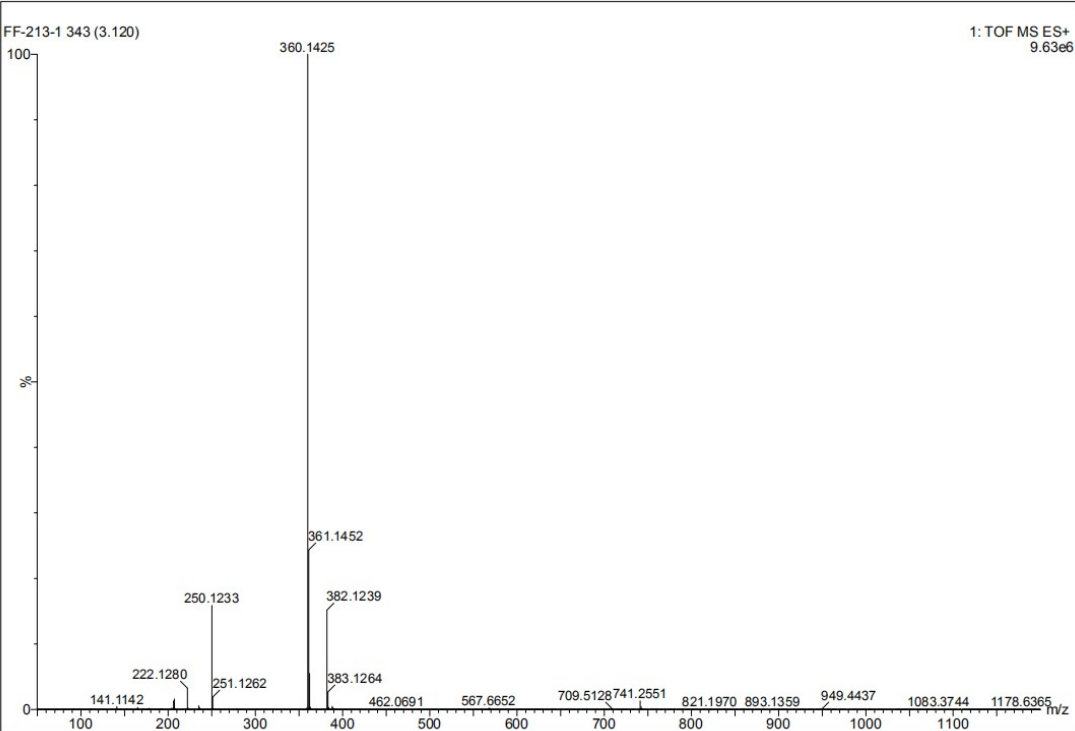

### 5-Hydroxy-1,3-dimethyl-3-((phenylthio)methyl)indolin-2-one (3o)

<sup>1</sup>H NMR (600 MHz, DMSO-d<sub>6</sub>)

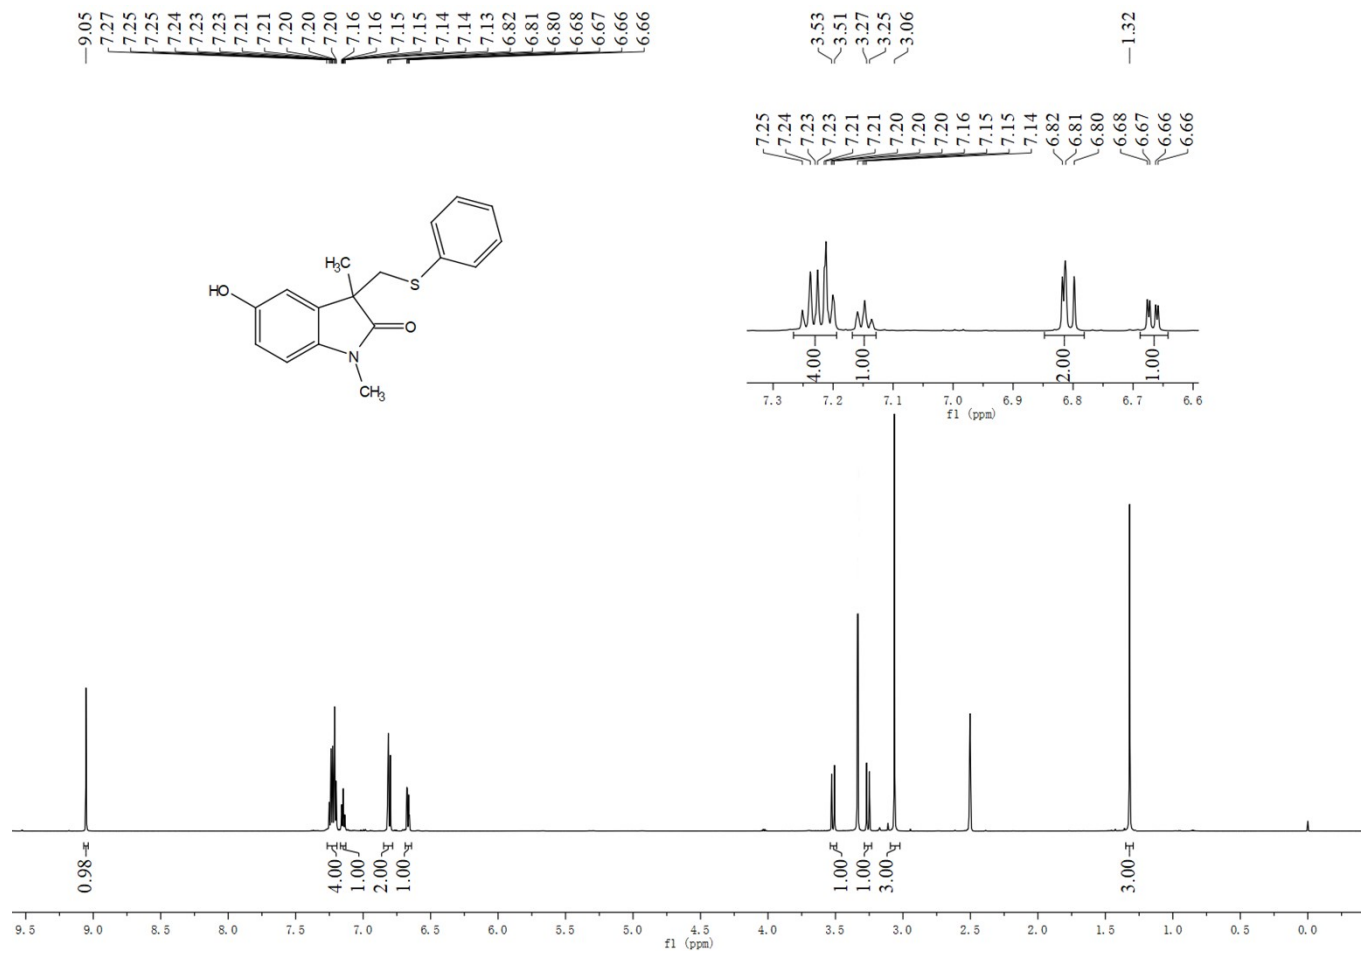

<sup>13</sup>C NMR (150 MHz, DMSO-d<sub>6</sub>)

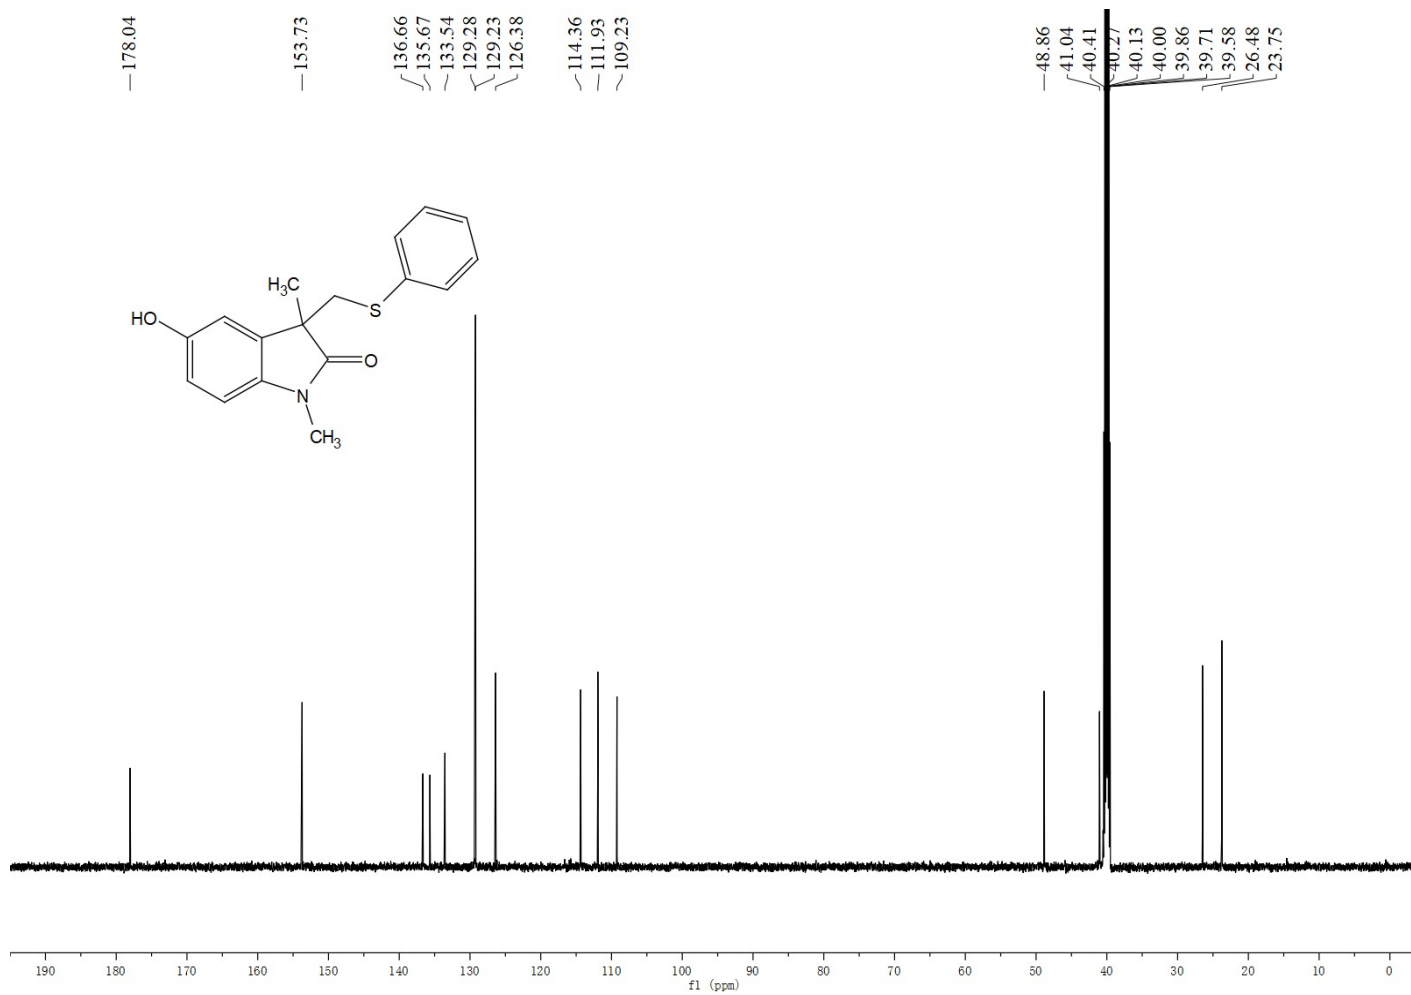

HRMS (ESI)

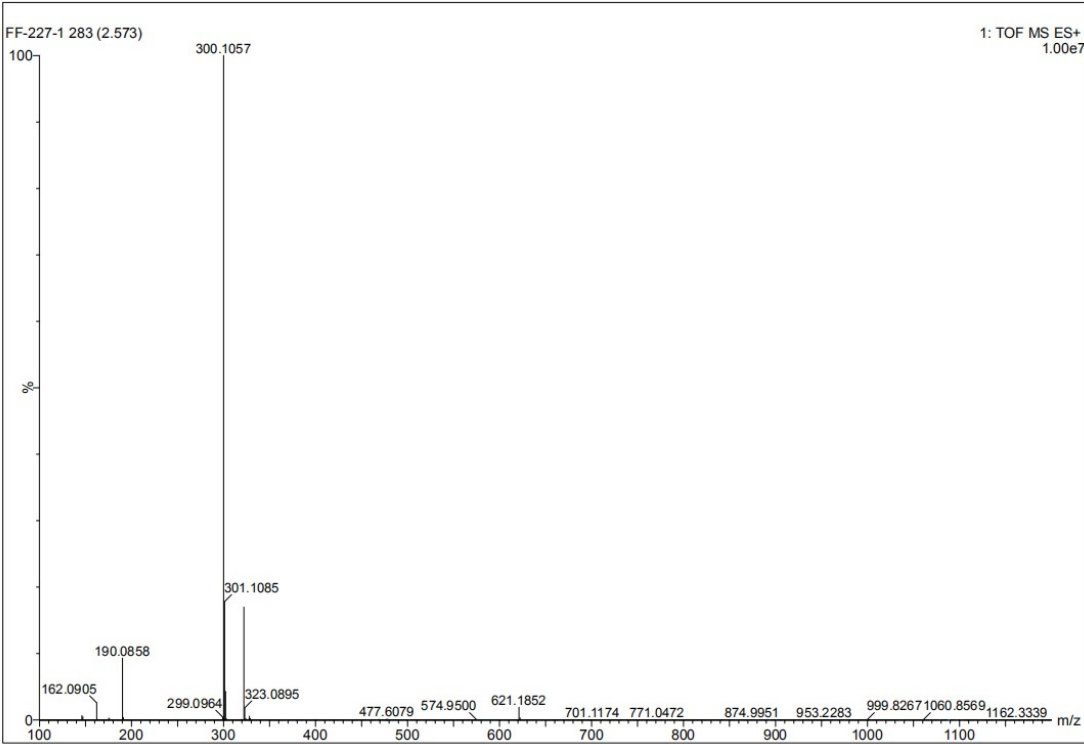

# 1,3-Dimethyl-3-((phenylthio)methyl)-5-(trifluoromethoxy)indolin-2-one (3p)

<sup>1</sup>H NMR (400 MHz, CDCl<sub>3</sub>)

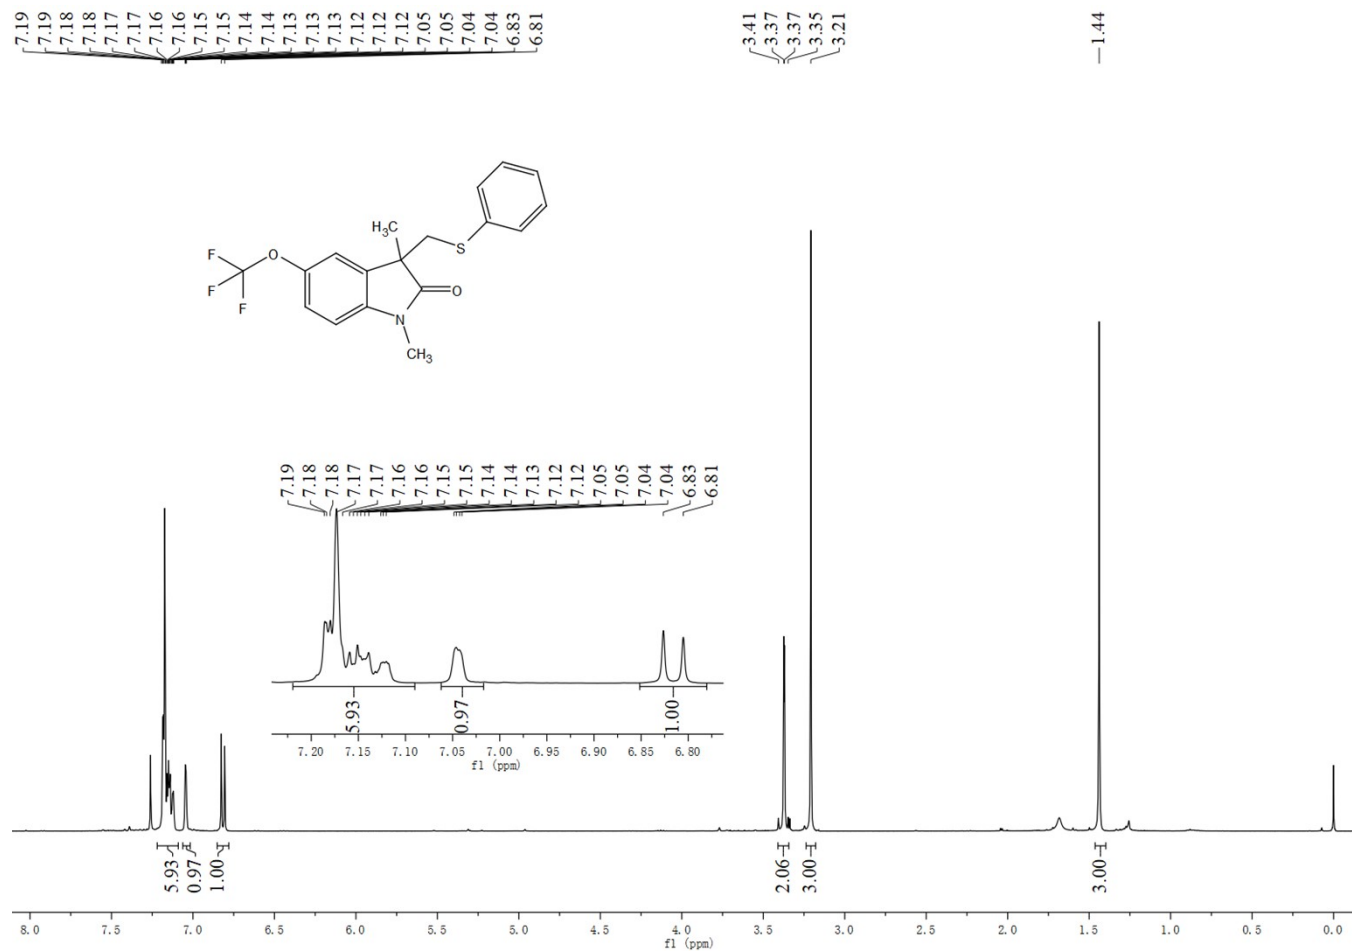



<sup>13</sup>C NMR (100 MHz, CDCl<sub>3</sub>)

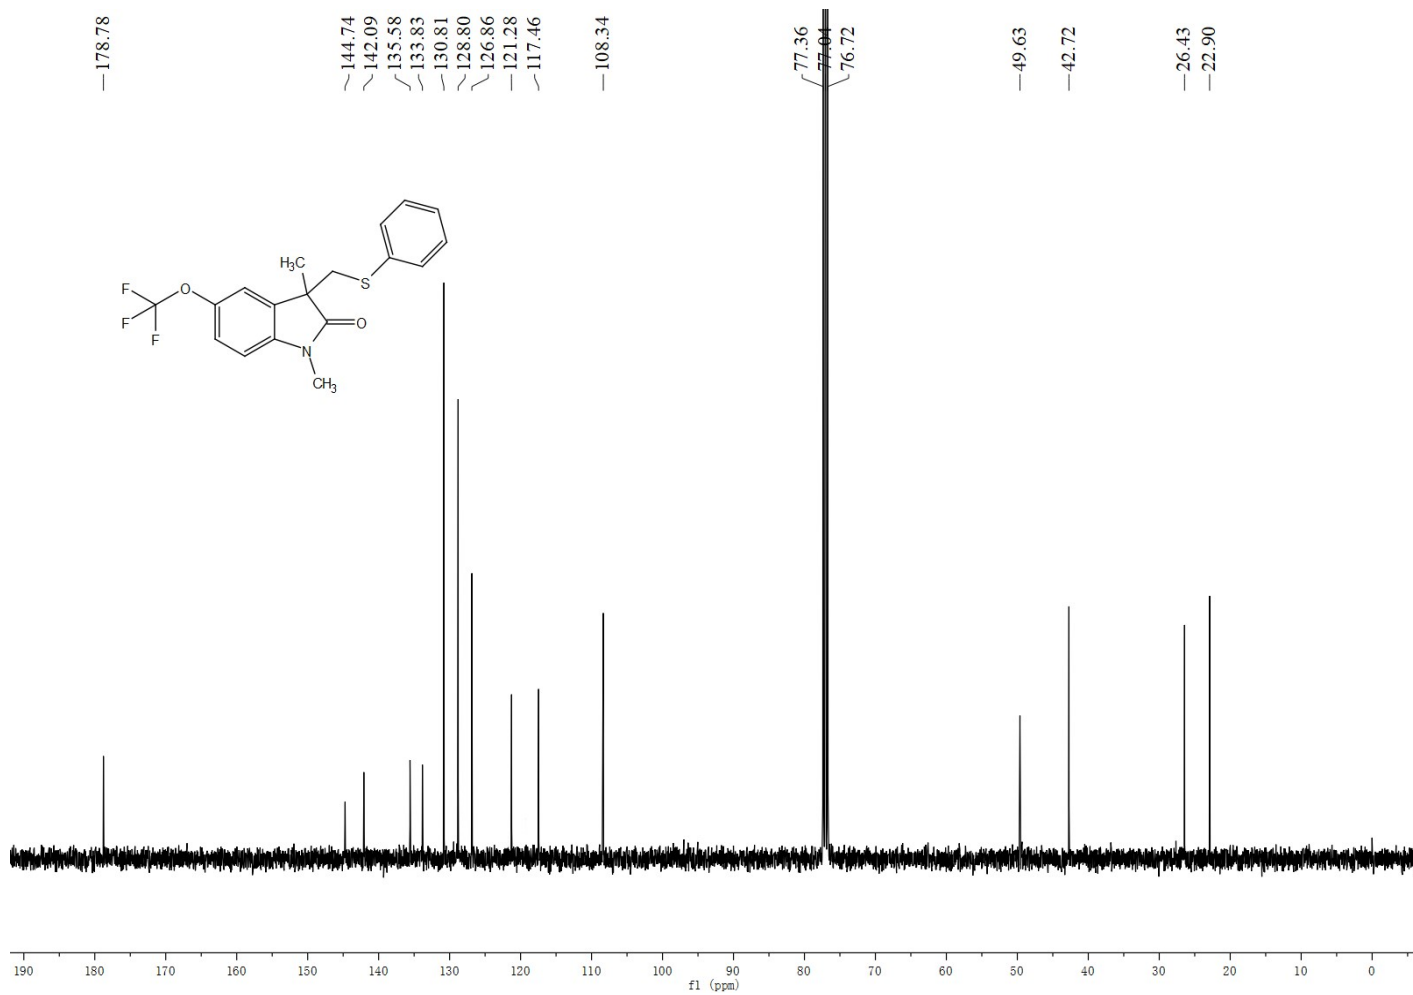

$^{19}\text{F}$  NMR (565 MHz,  $\text{CDCl}_3$ )

—58.25

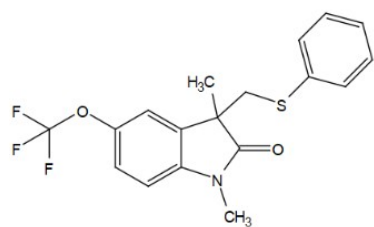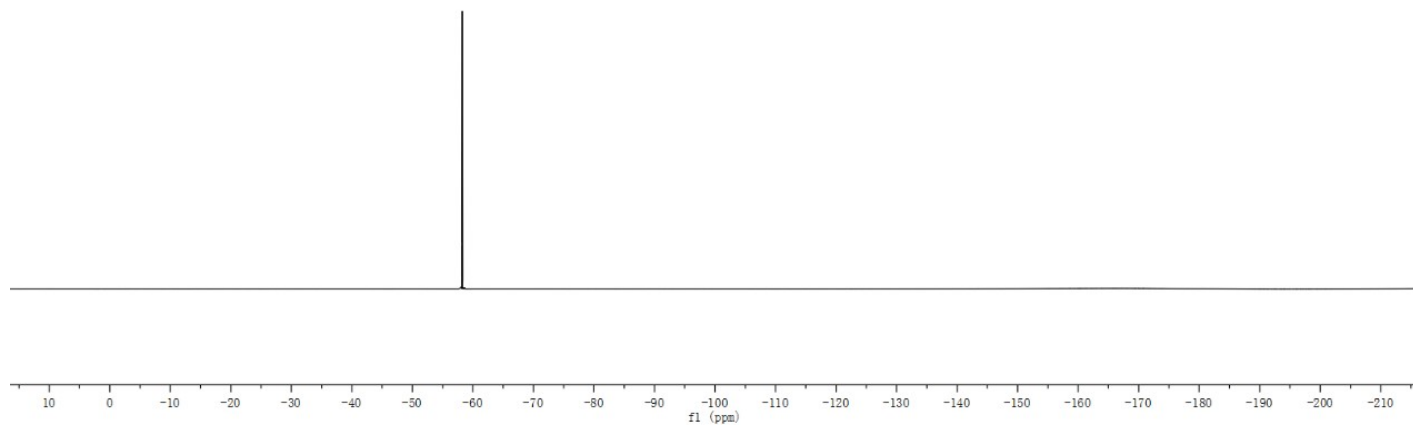

HRMS (ESI)

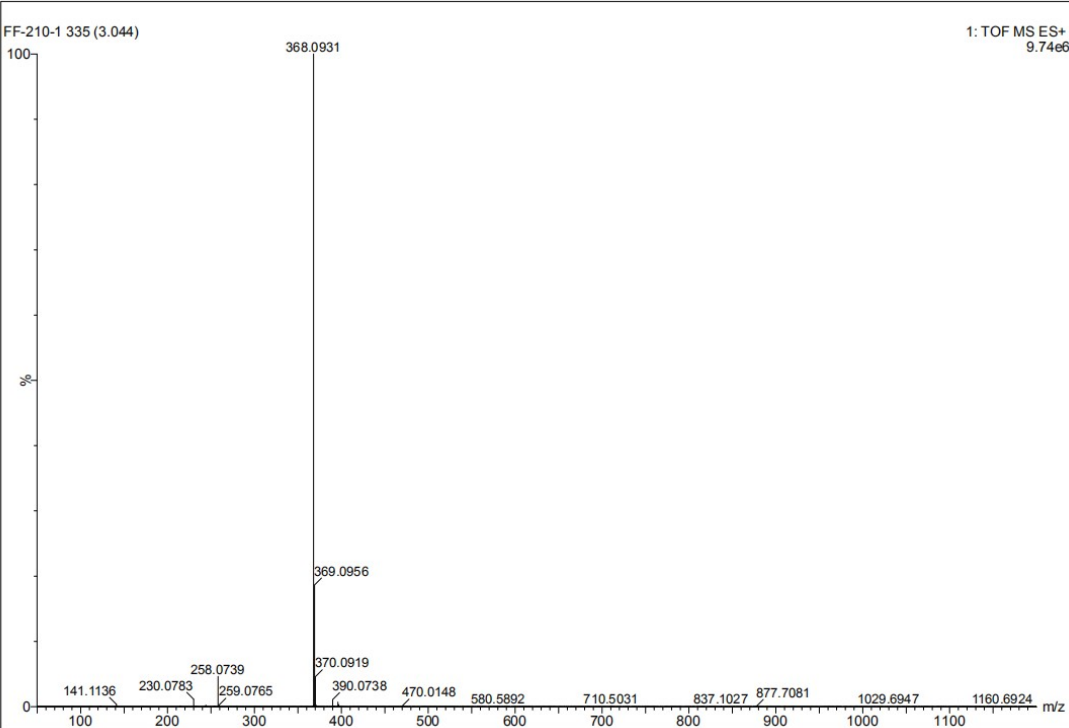

**1,3,4-Trimethyl-3-((phenylthio)methyl)indolin-2-one / 1,3,6-trimethyl-3-((phenylthio)methyl)indolin-2-one (1.5:1) (3q:3q')**

<sup>1</sup>H NMR (400 MHz, CDCl<sub>3</sub>)

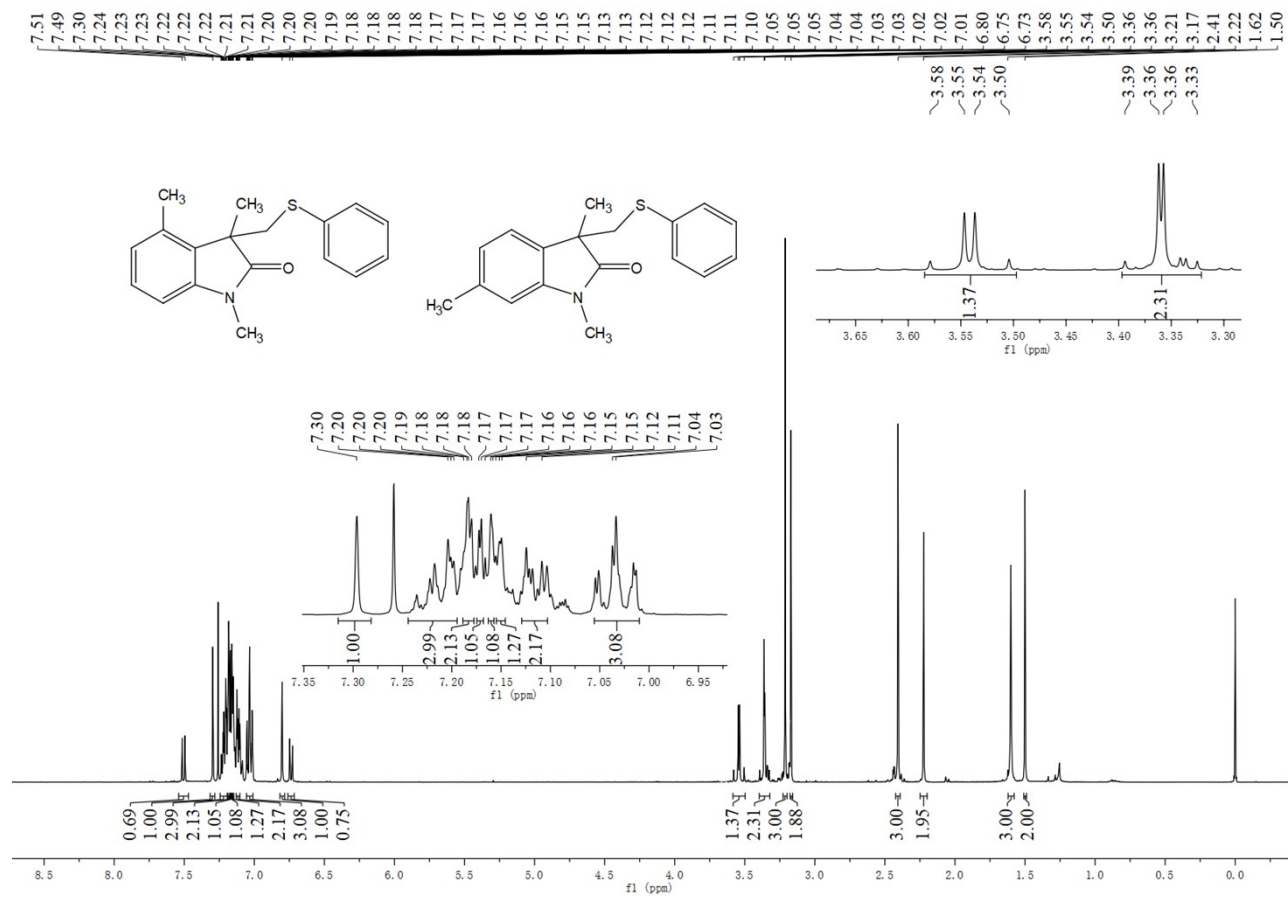

$^{13}\text{C}$  NMR (150 MHz,  $\text{CDCl}_3$ )

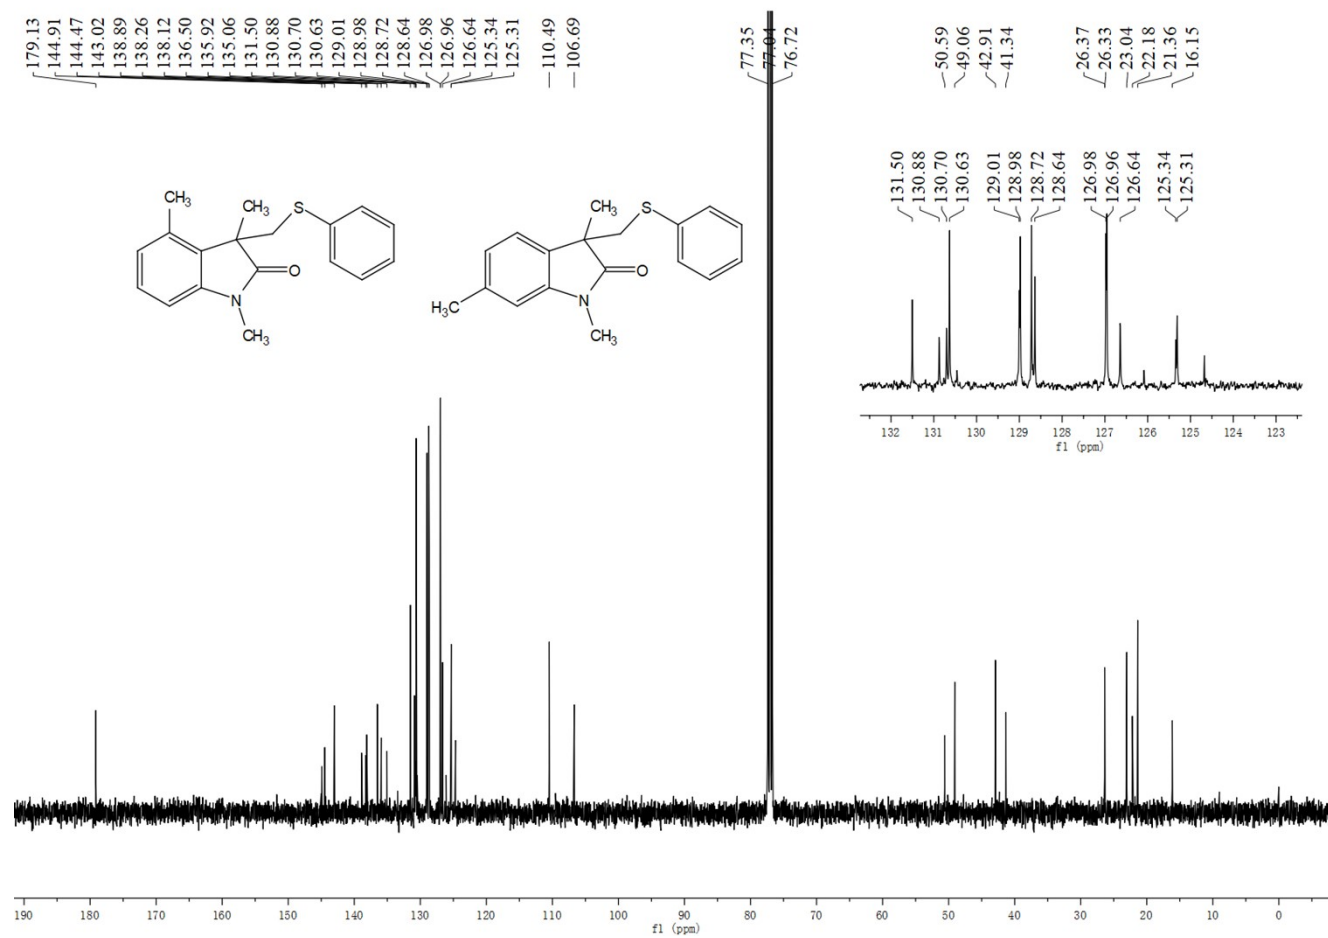

HRMS (ESI)

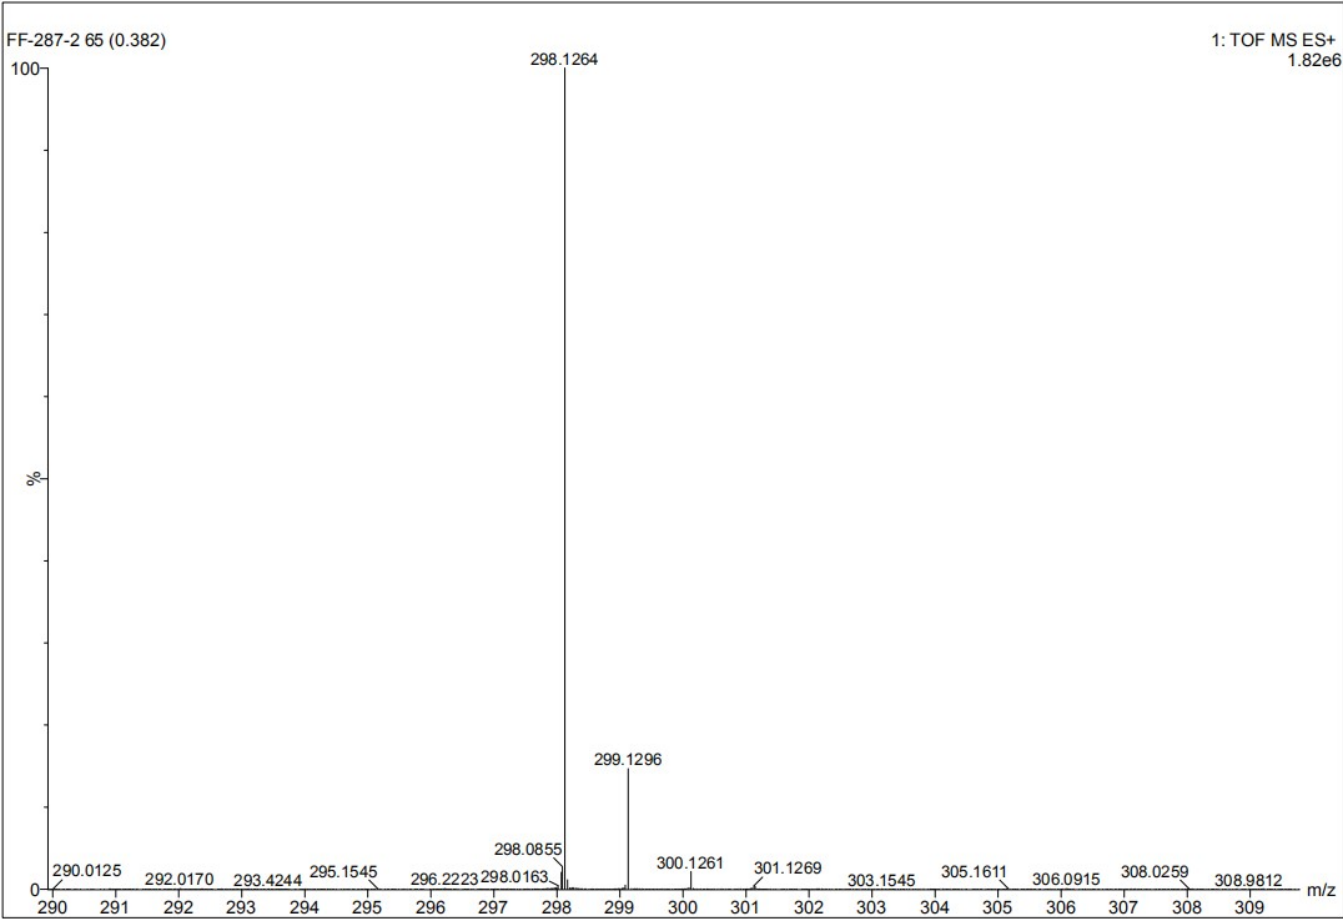

# 1,3,5,7-Tetramethyl-3-((phenylthio)methyl)indolin-2-one (3r)

<sup>1</sup>H NMR (600 MHz, CDCl<sub>3</sub>)

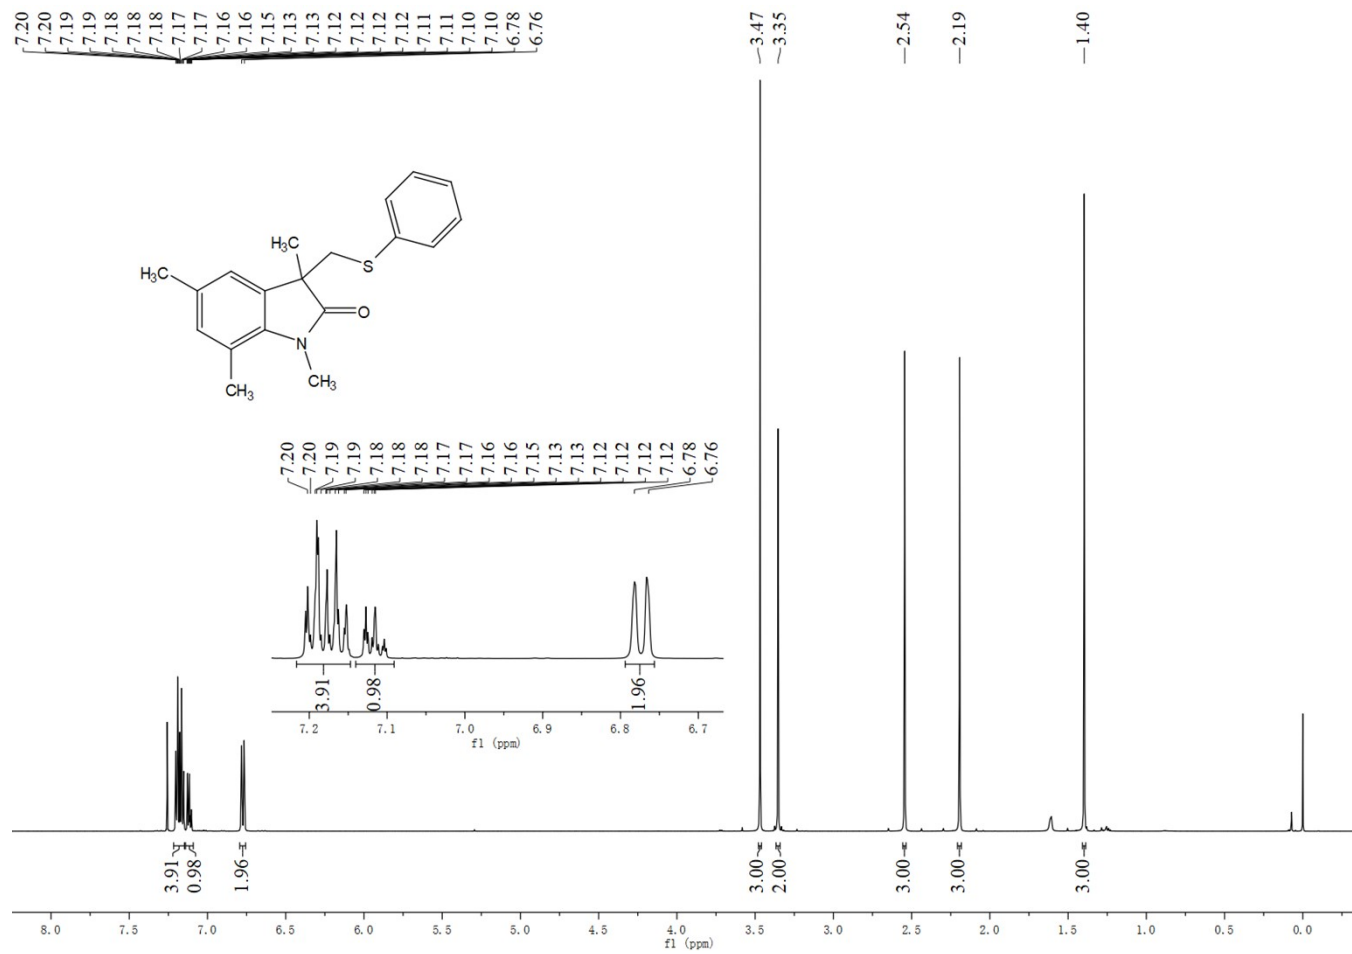

<sup>13</sup>C NMR (150 MHz, CDCl<sub>3</sub>)

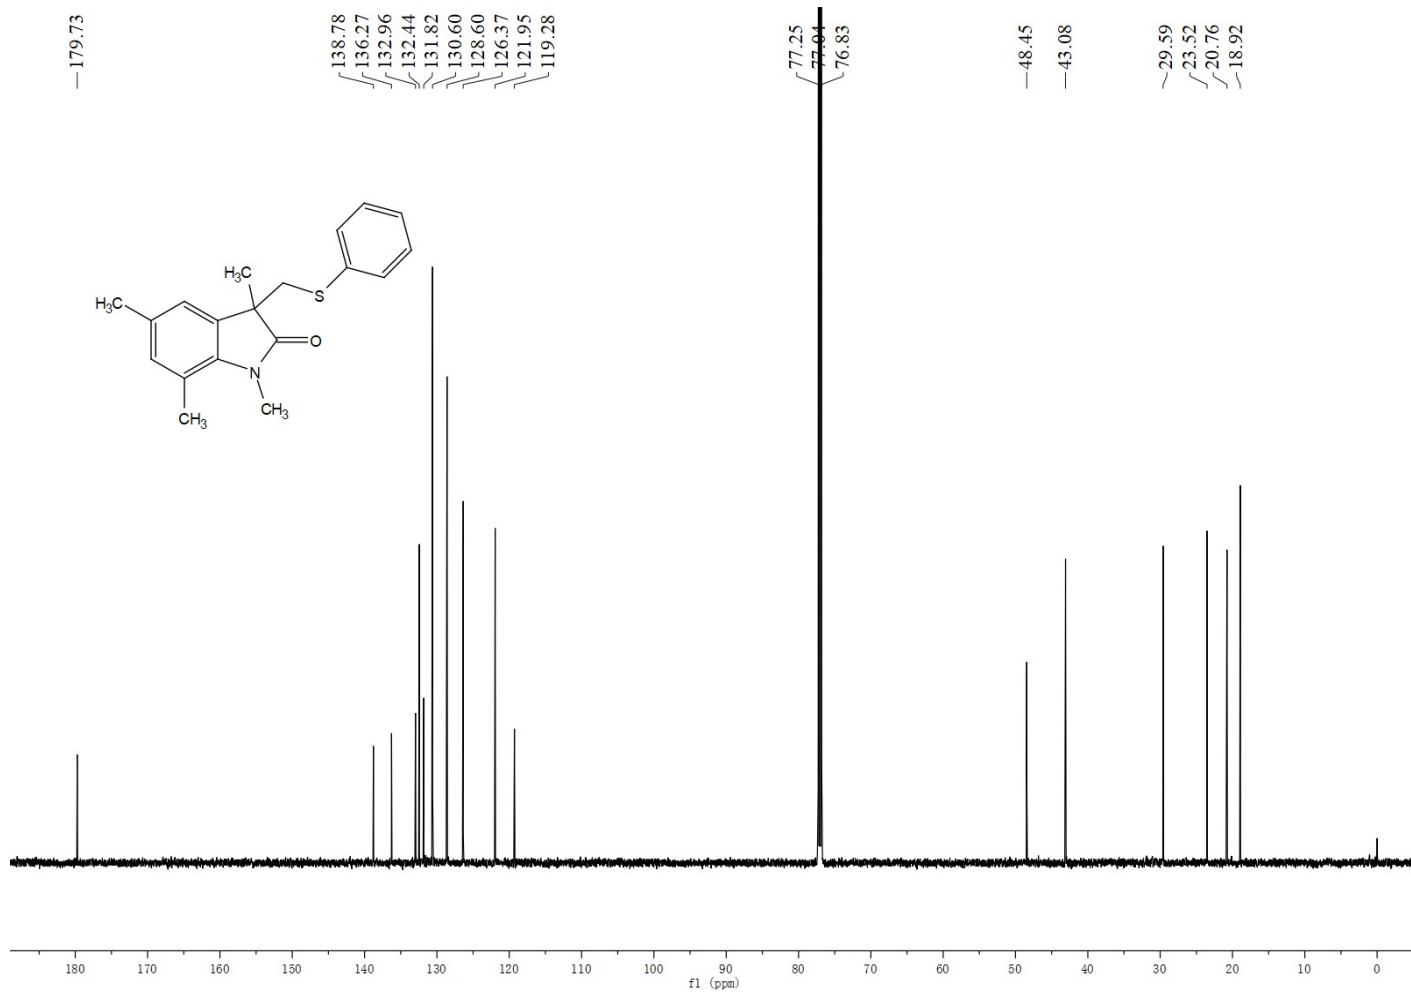



HRMS (ESI)

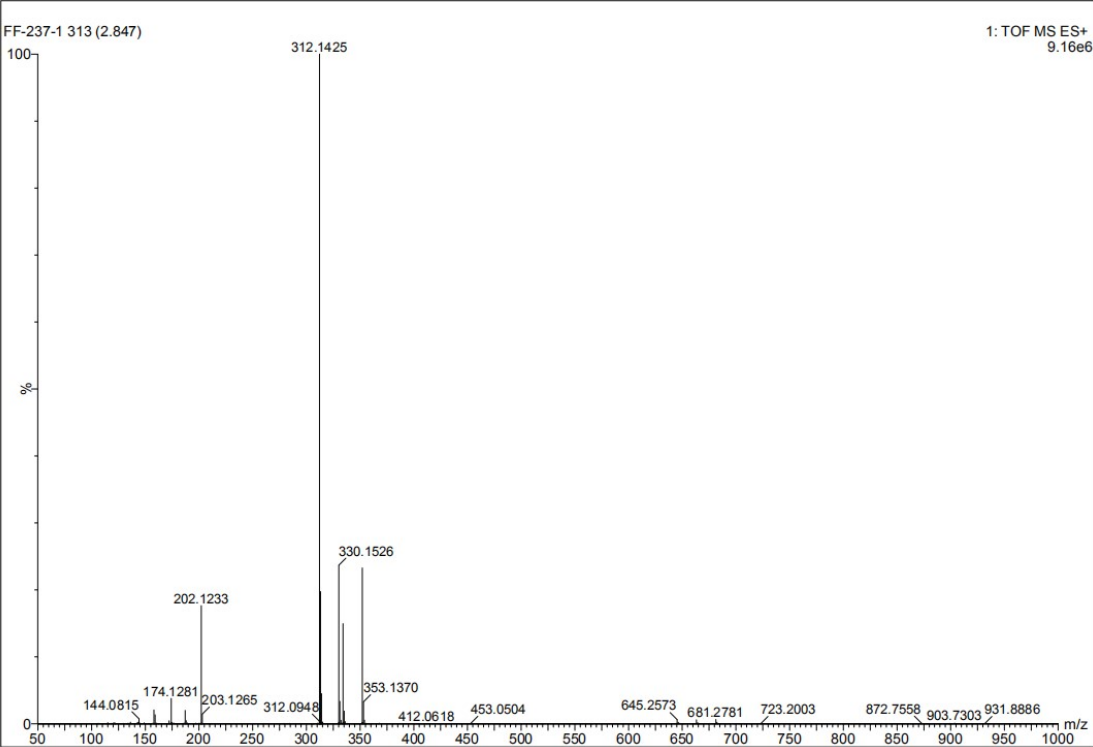

# 1,3,5-Trimethyl-3-((p-tolylthio)methyl)indolin-2-one (3s)

$^1\text{H}$  NMR (600 MHz,  $\text{CDCl}_3$ )

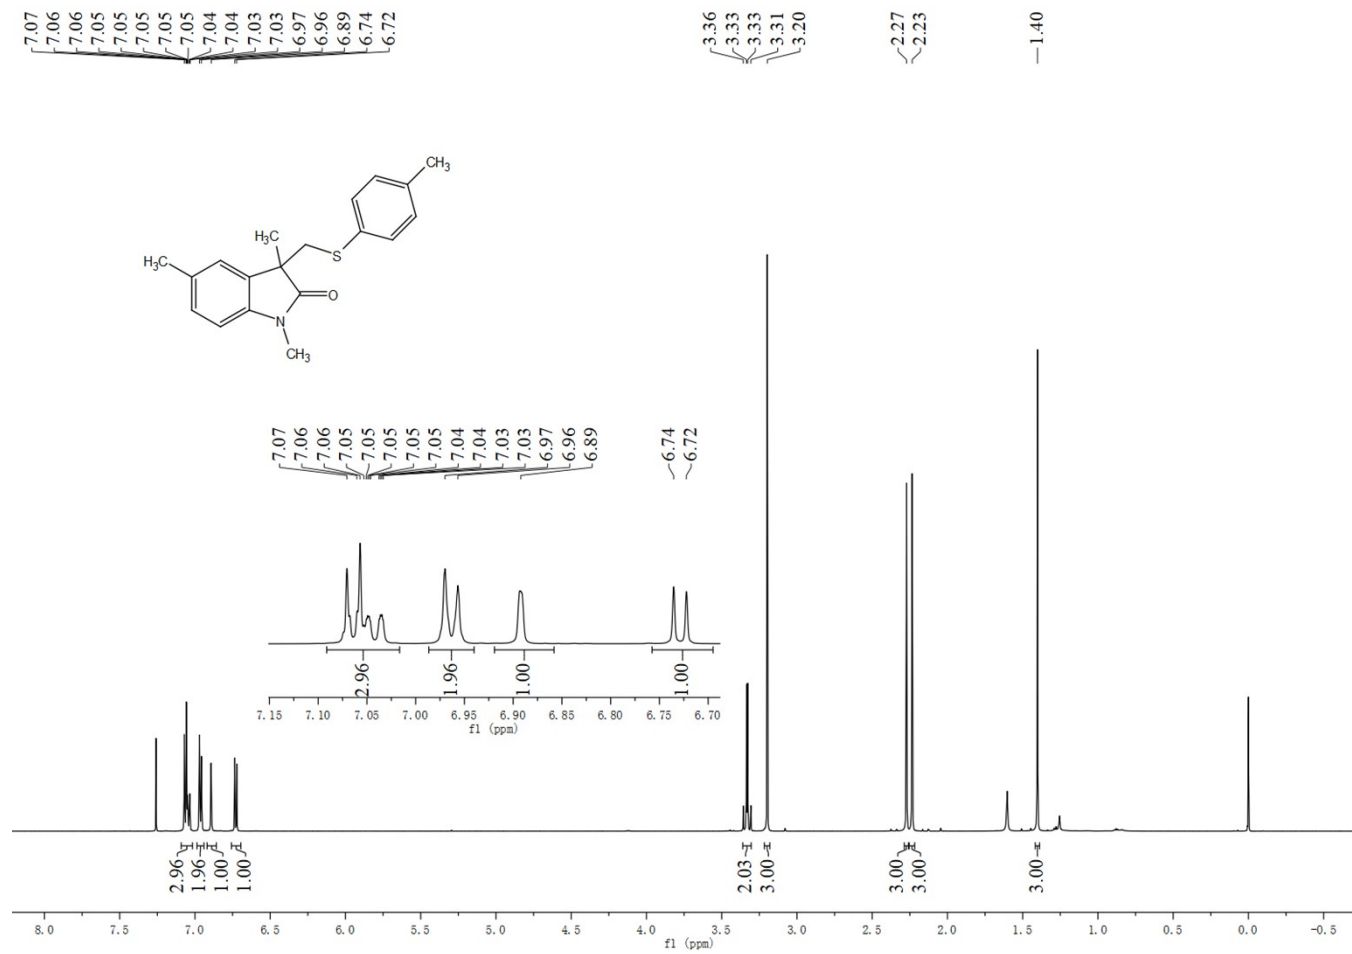

<sup>13</sup>C NMR (150 MHz, CDCl<sub>3</sub>)

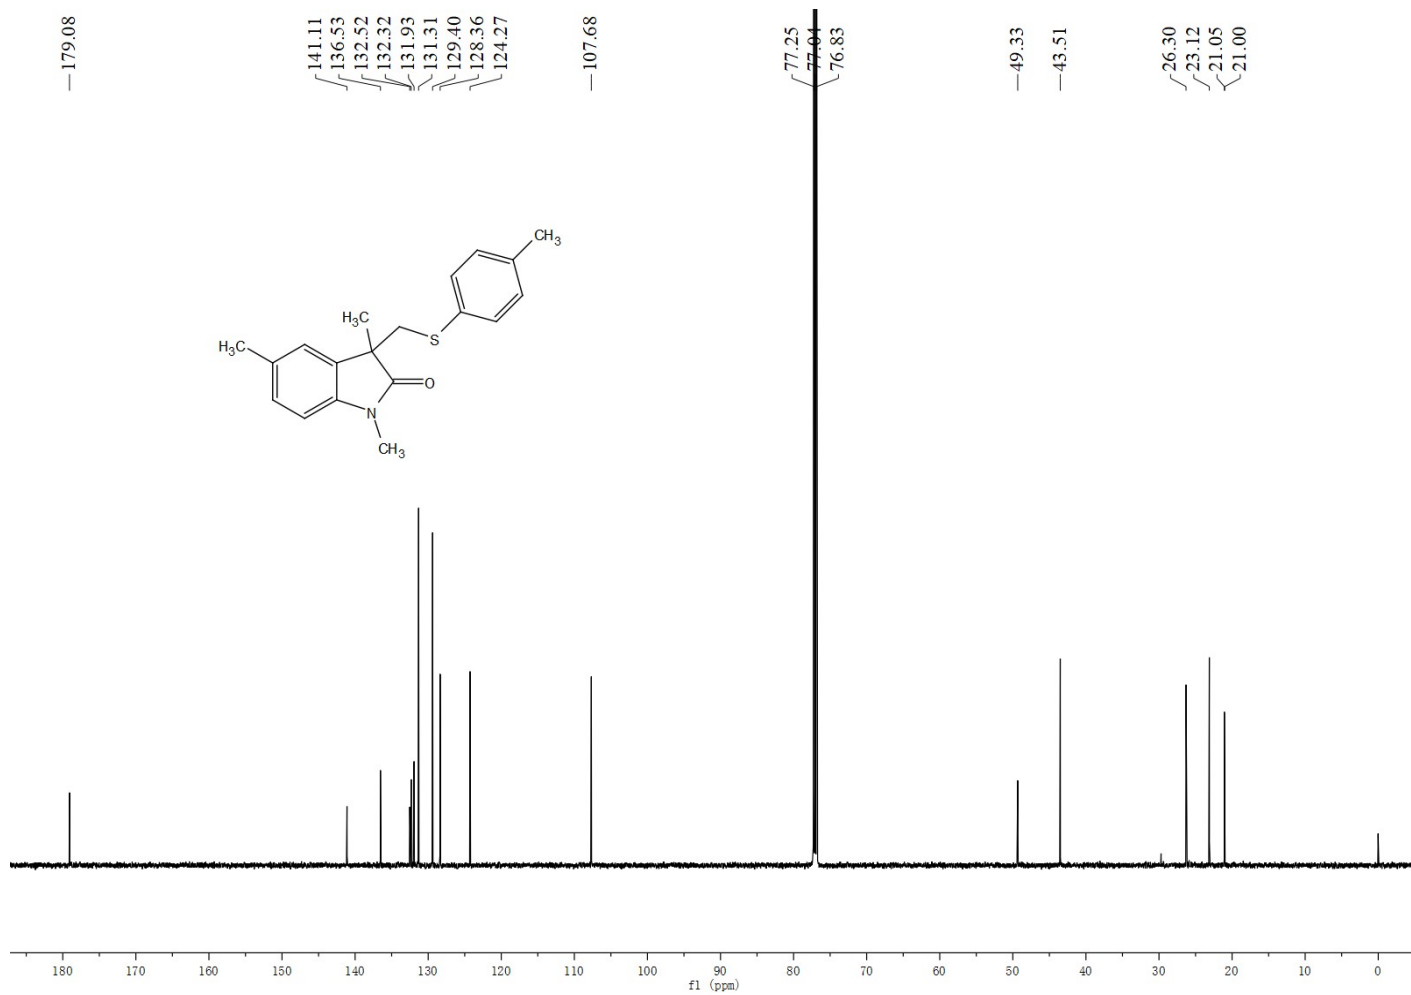

HRMS (ESI)

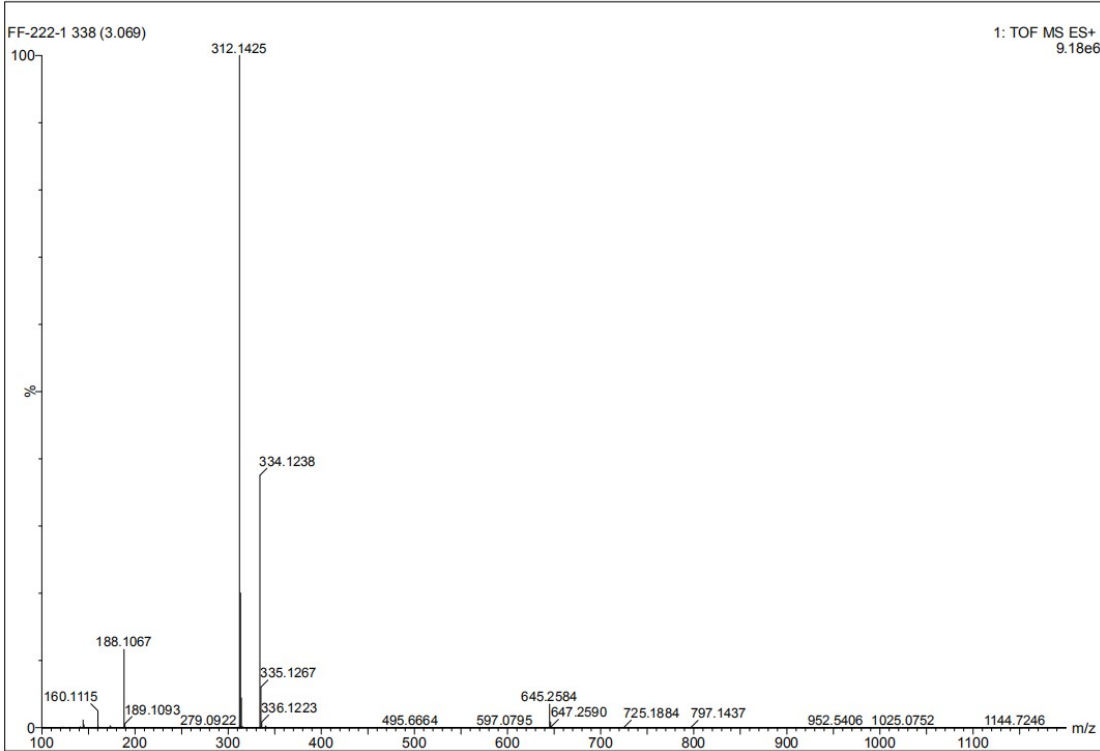

### 3-(((4-Methoxyphenyl)thio)methyl)-1,3,5-trimethylindolin-2-one (3t)

$^1\text{H}$  NMR (400 MHz,  $\text{CDCl}_3$ )

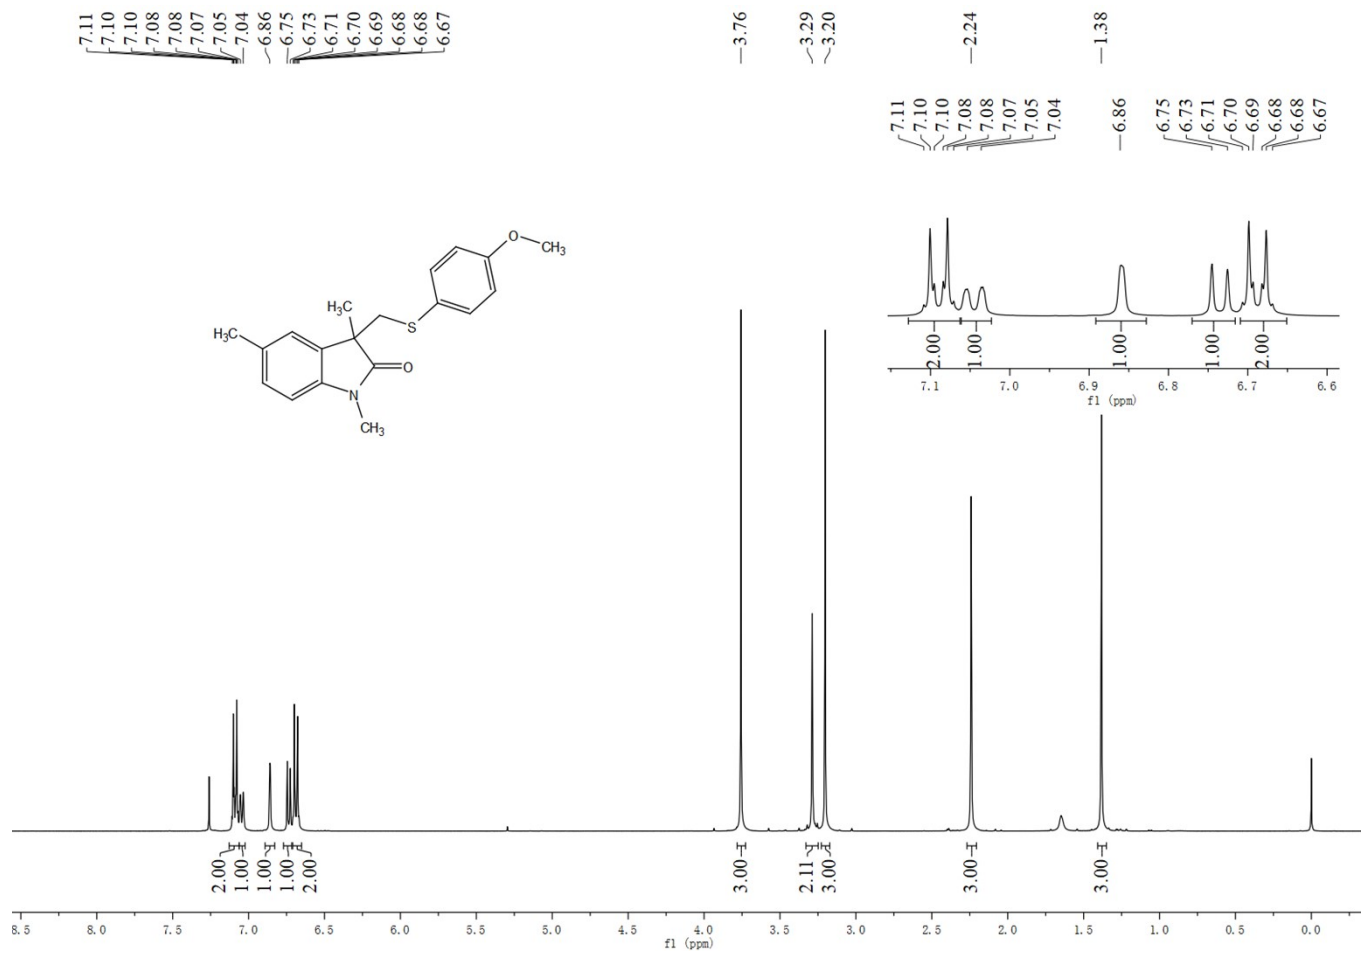

$^{13}\text{C}$  NMR (100 MHz,  $\text{CDCl}_3$ )

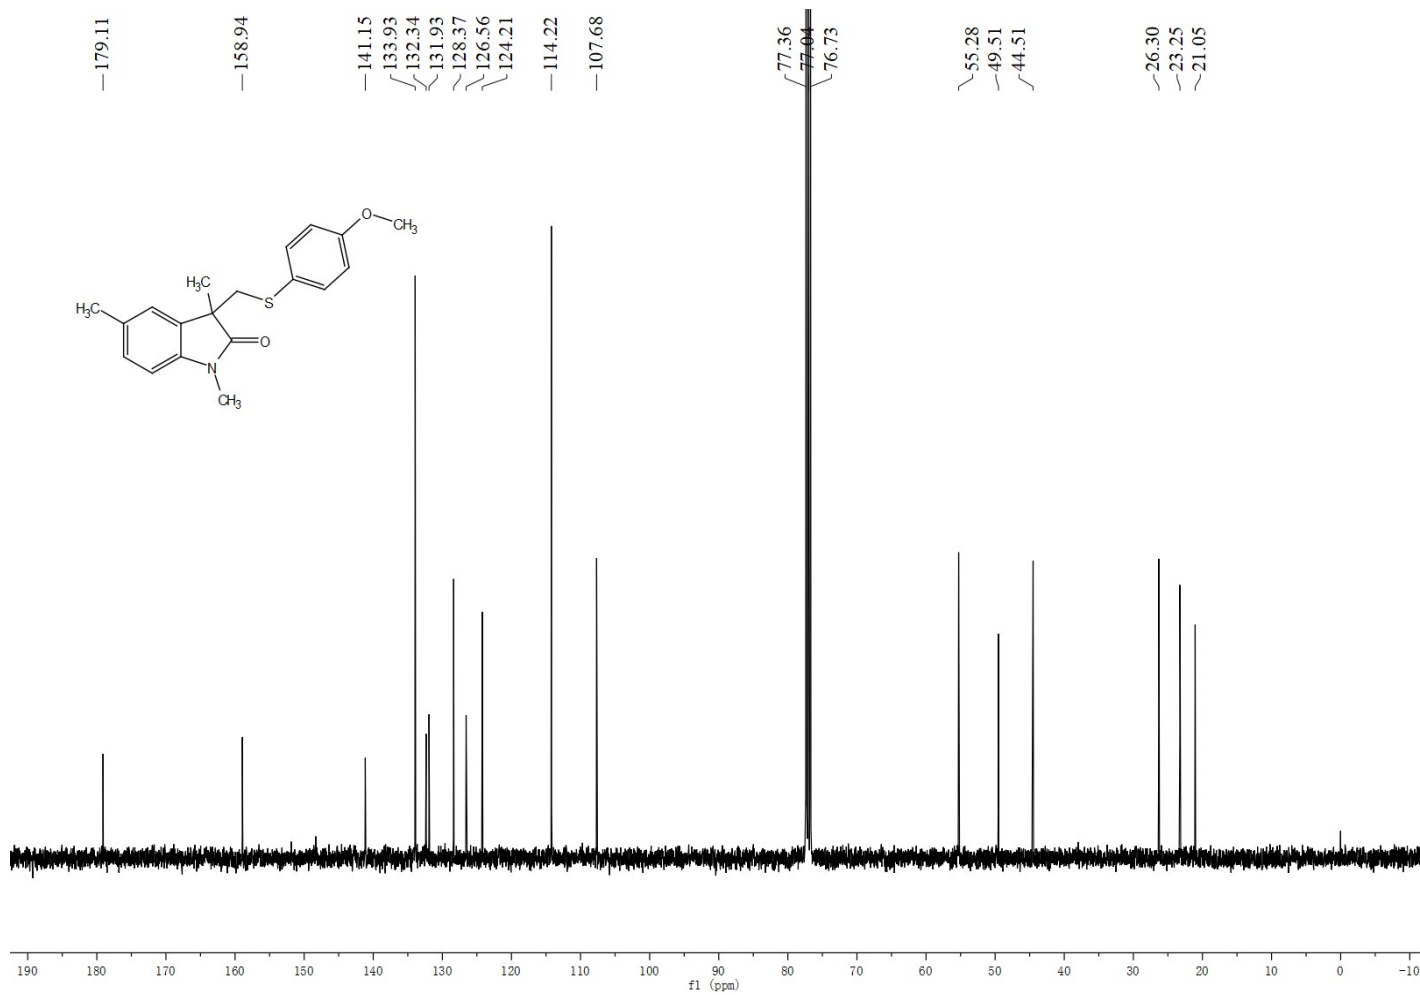

HRMS (ESI)

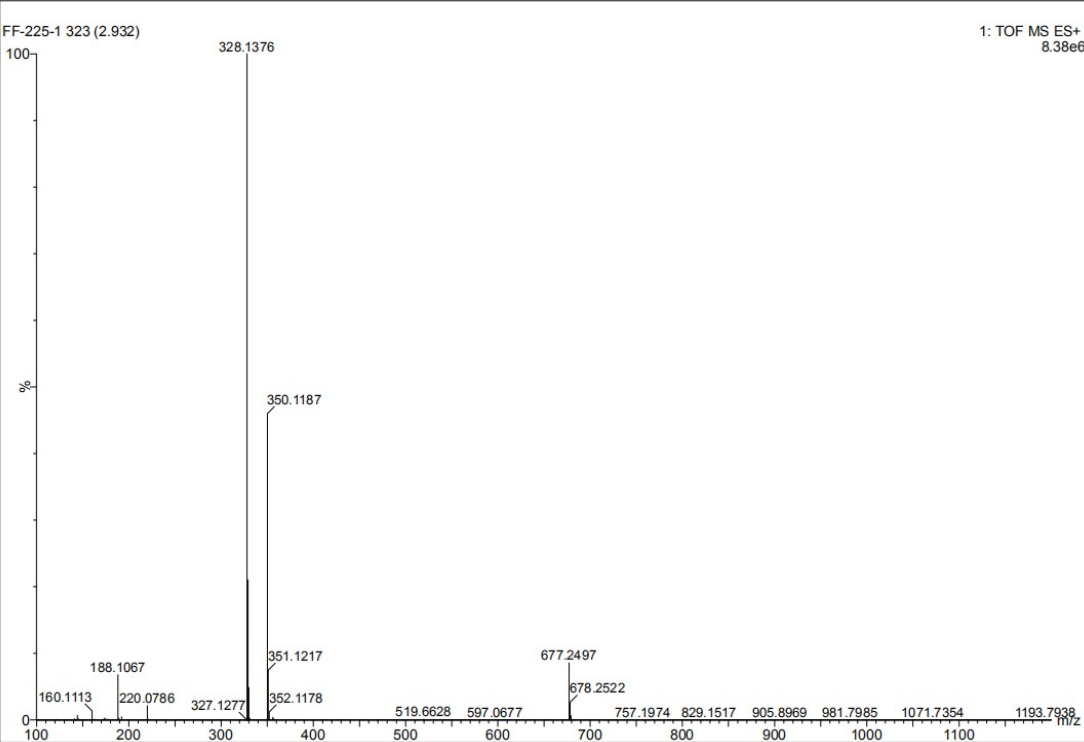

**3-(((4-Chlorophenyl)thio)methyl)-1,3,5-trimethylindolin-2-one (3u)**

<sup>1</sup>H NMR (400 MHz, CDCl<sub>3</sub>)

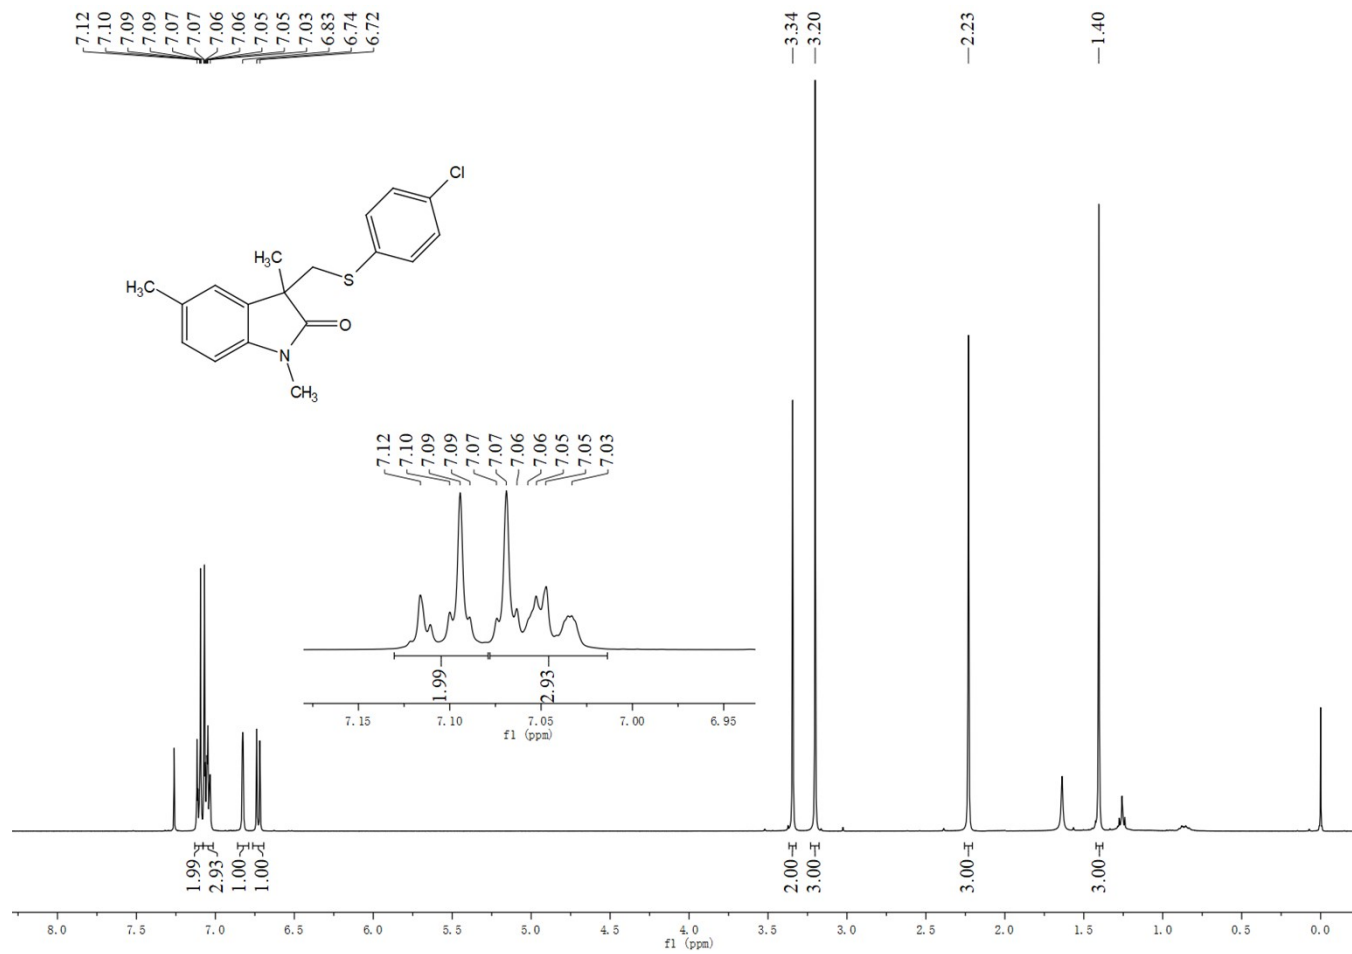



<sup>13</sup>C NMR (100 MHz, CDCl<sub>3</sub>)

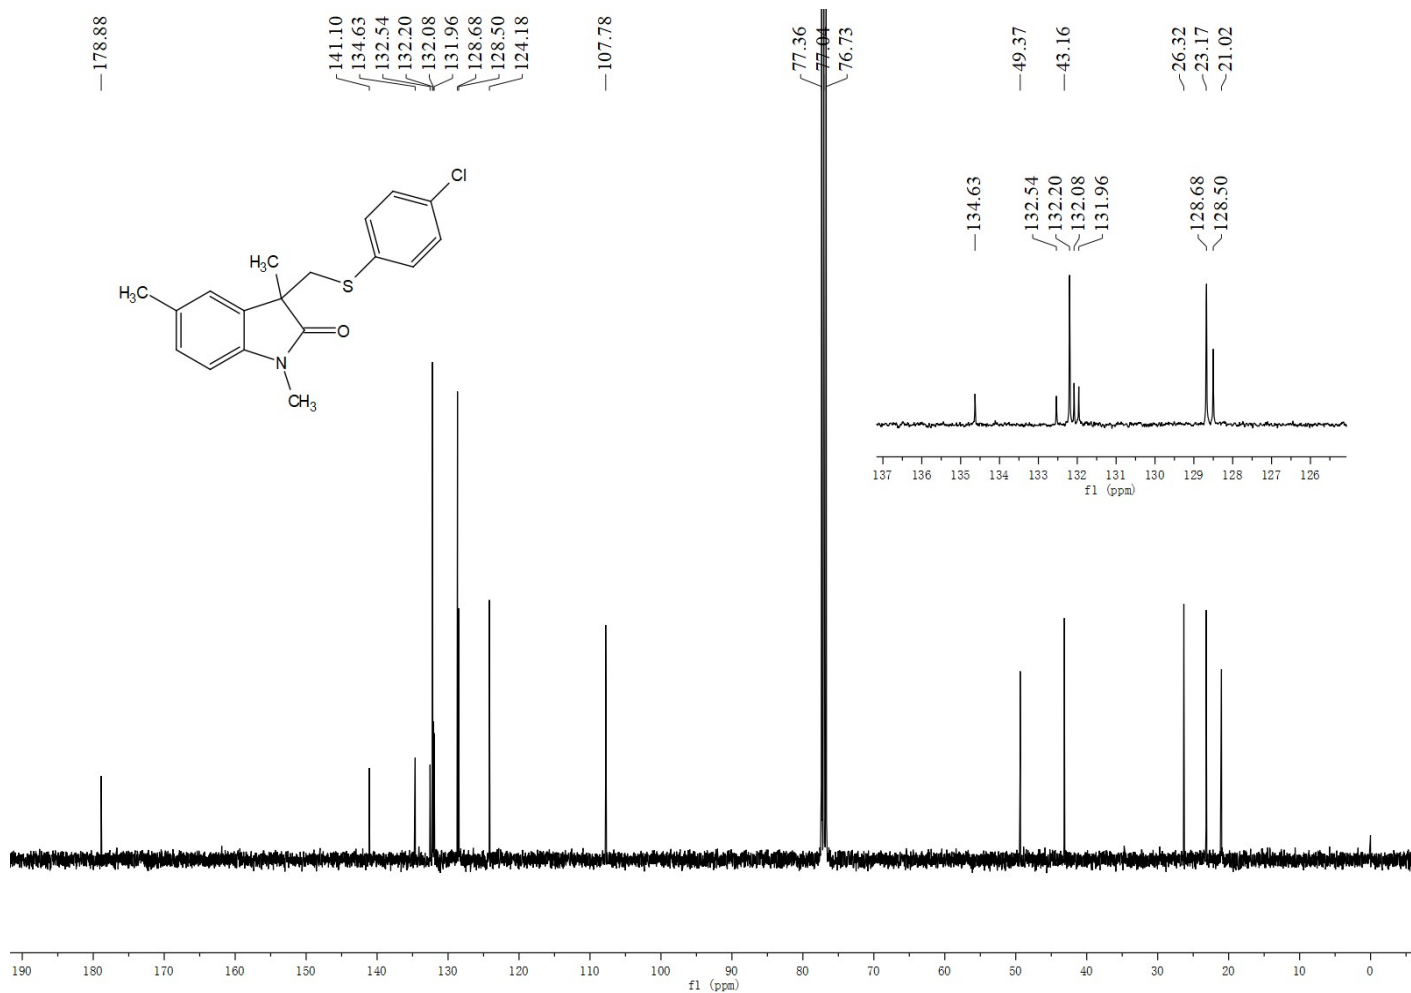

HRMS (ESI)

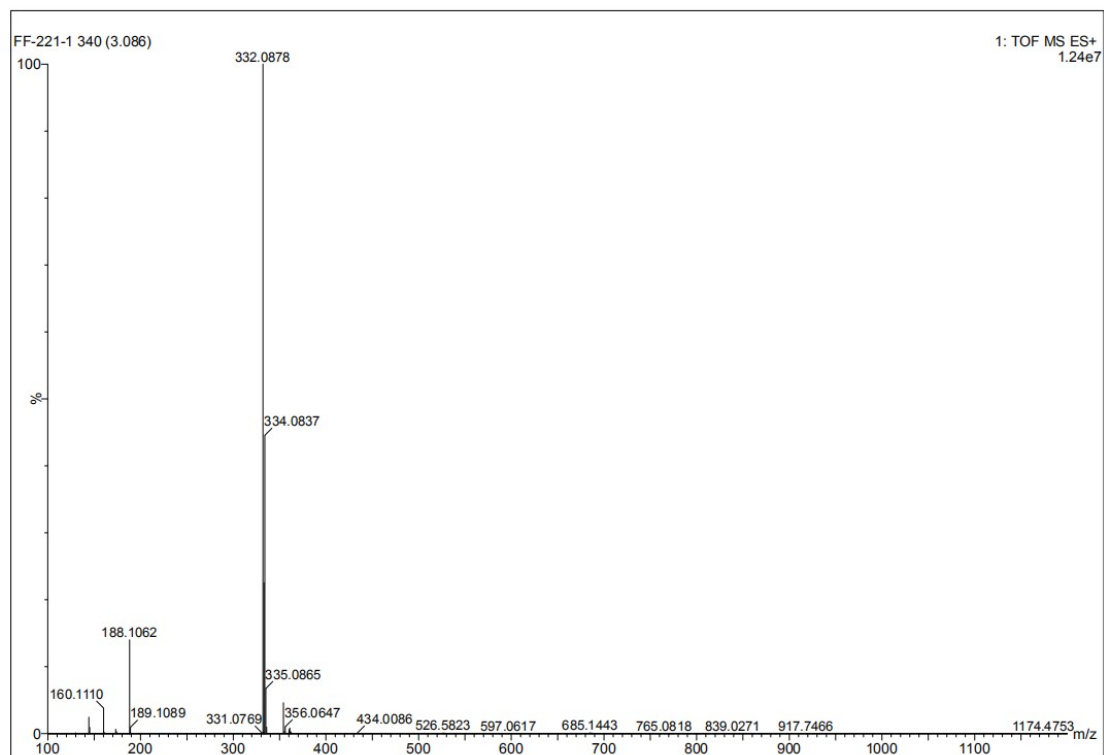

### 3-(((4-Fluorophenyl)thio)methyl)-1,3,5-trimethylindolin-2-one (3v)

$^1\text{H}$  NMR (600 MHz,  $\text{CDCl}_3$ )

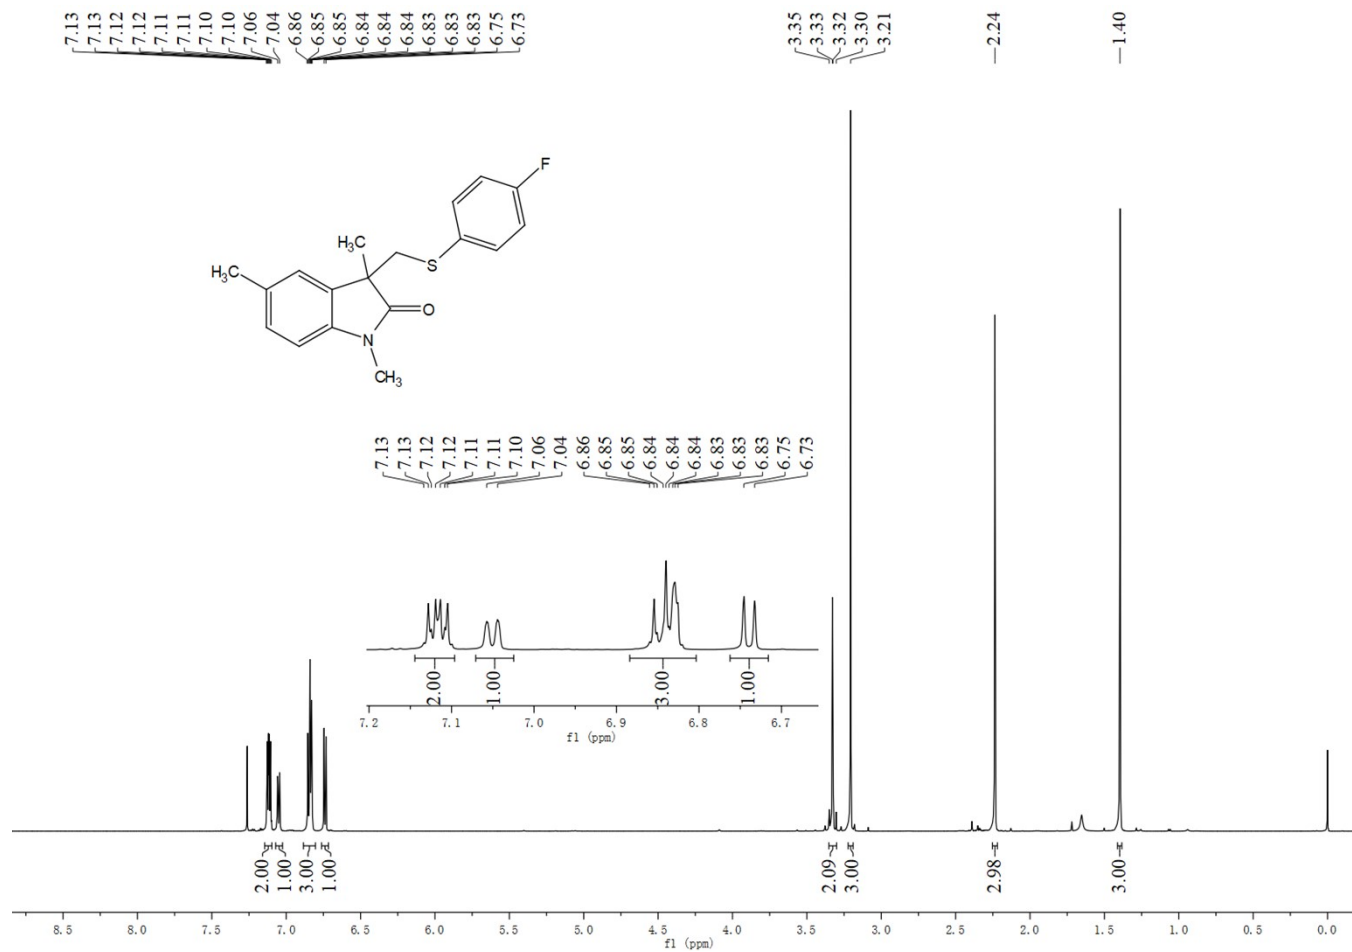

<sup>13</sup>C NMR (150 MHz, CDCl<sub>3</sub>)

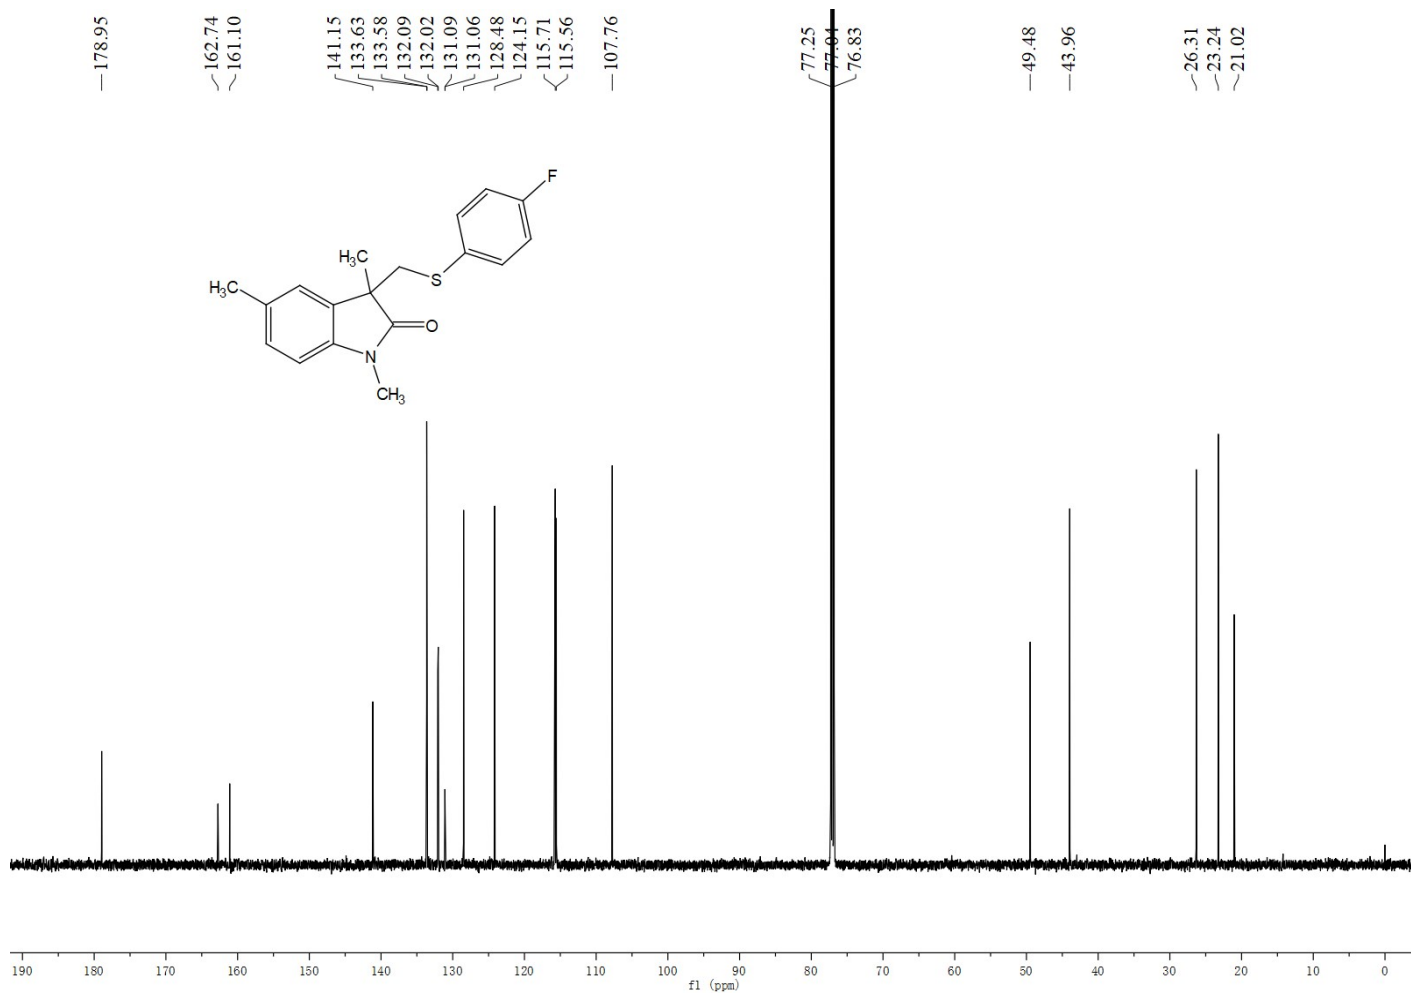

$^{19}\text{F}$  NMR (565 MHz,  $\text{CDCl}_3$ )

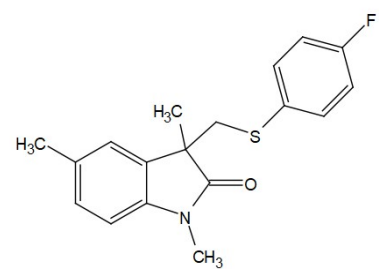

—115.19

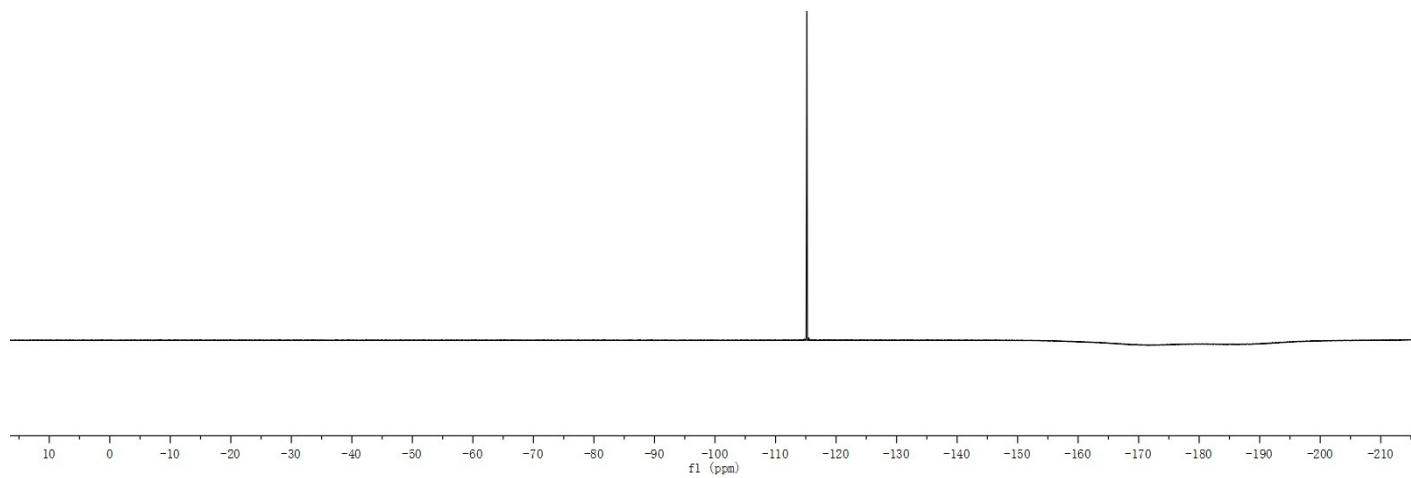

HRMS (ESI)

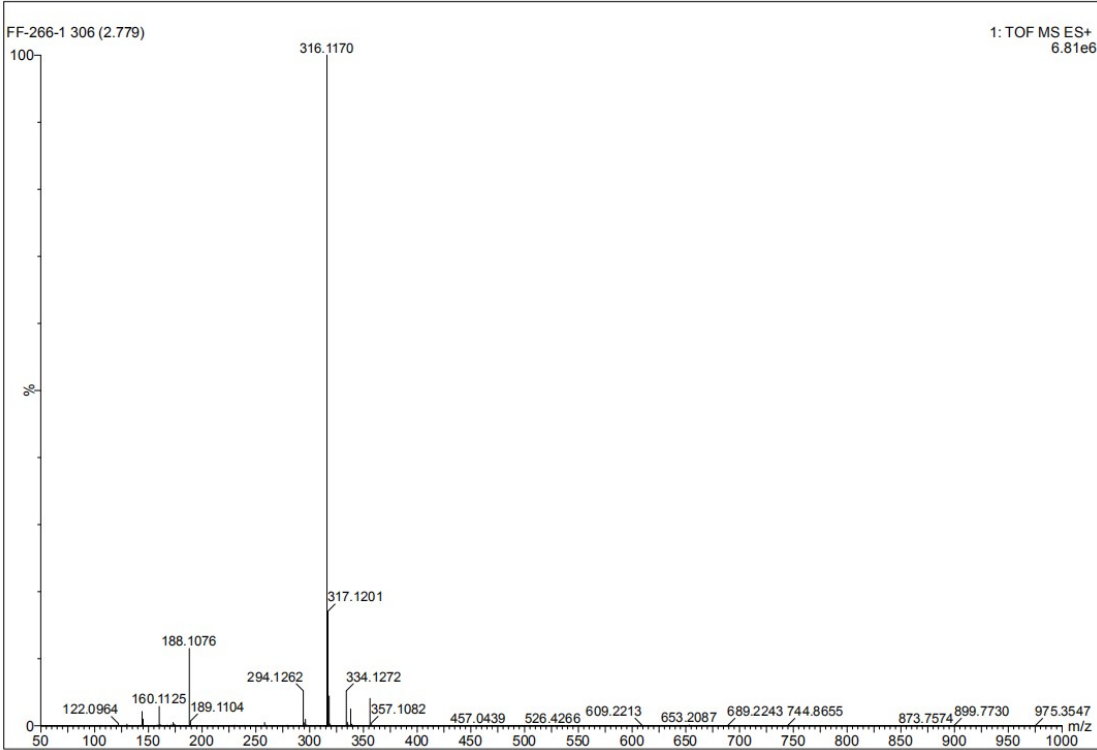

### 3-(((2-Fluorophenyl)thio)methyl)-1,3,5-trimethylindolin-2-one (3w)

$^1\text{H}$  NMR (400 MHz,  $\text{CDCl}_3$ )

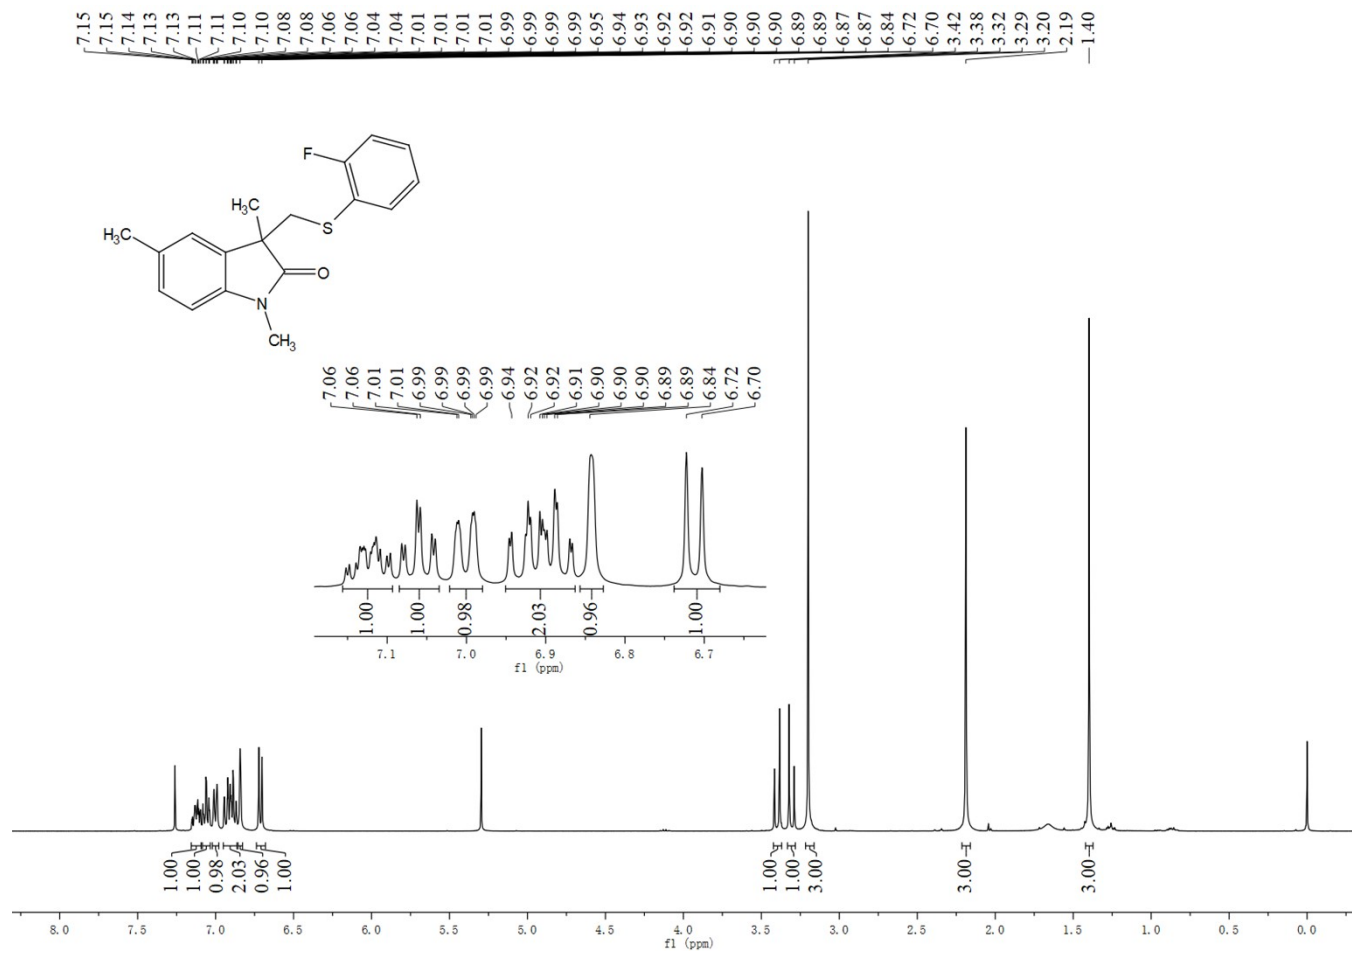

$^{13}\text{C}$  NMR (100 MHz,  $\text{CDCl}_3$ )

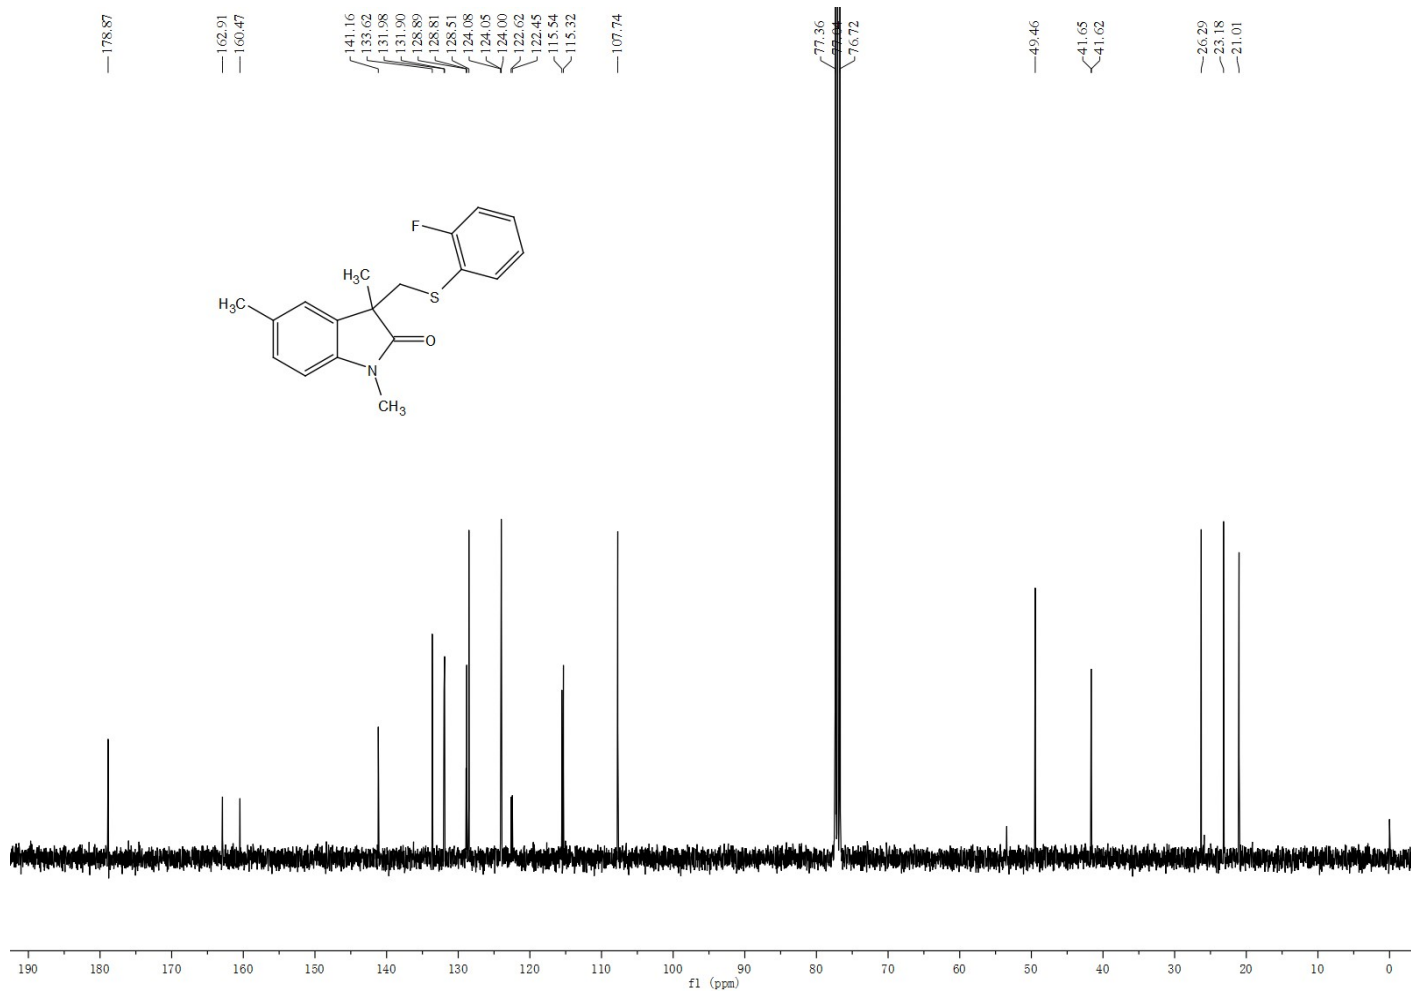



$^{19}\text{F}$  NMR (565 MHz,  $\text{CDCl}_3$ )

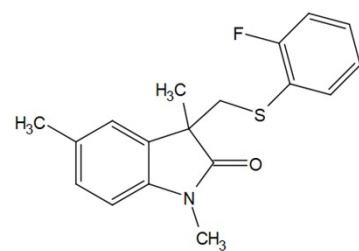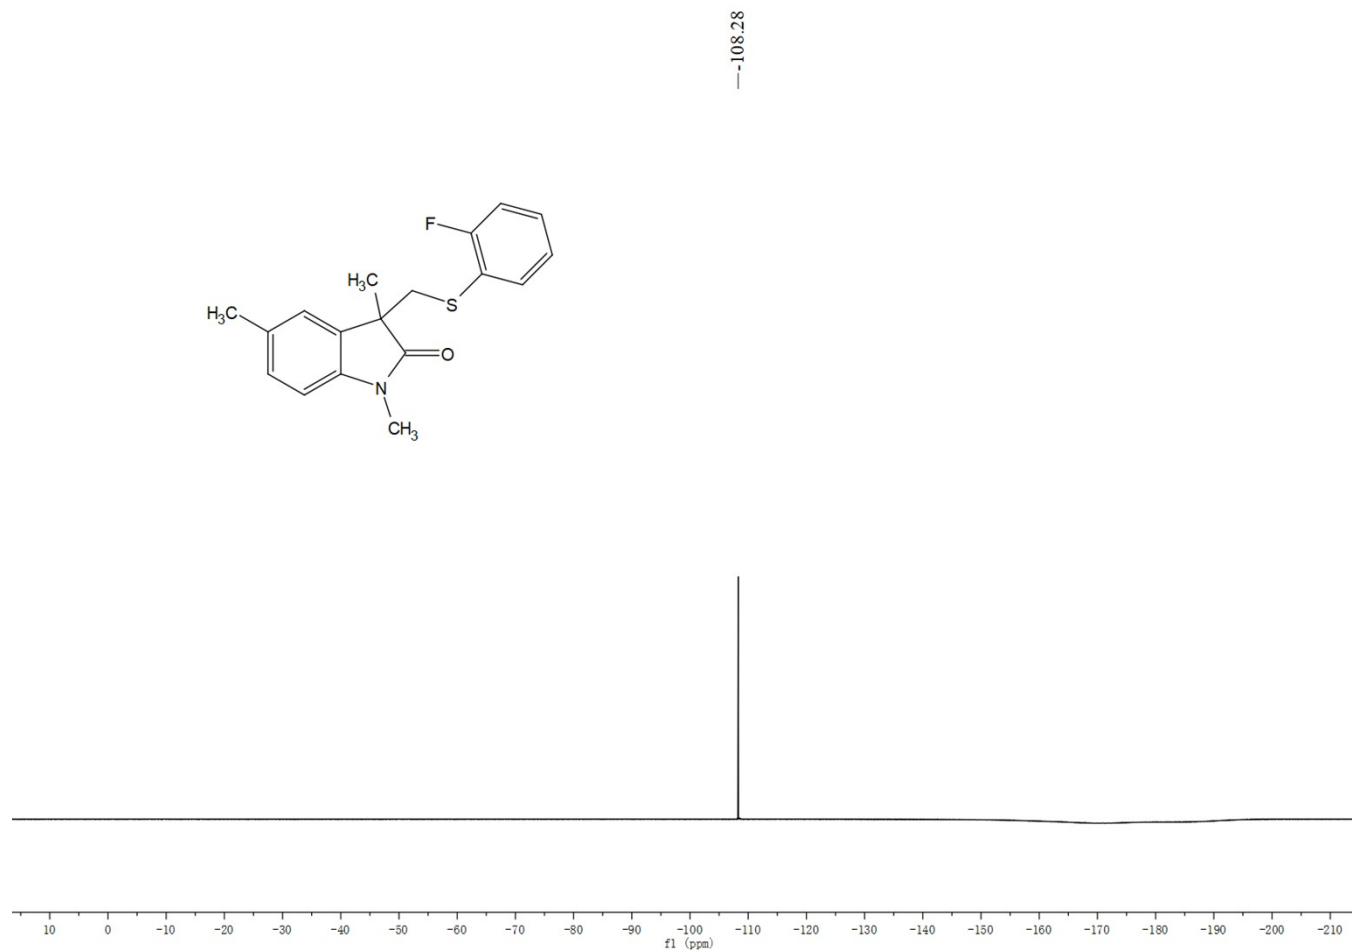

HRMS (ESI)

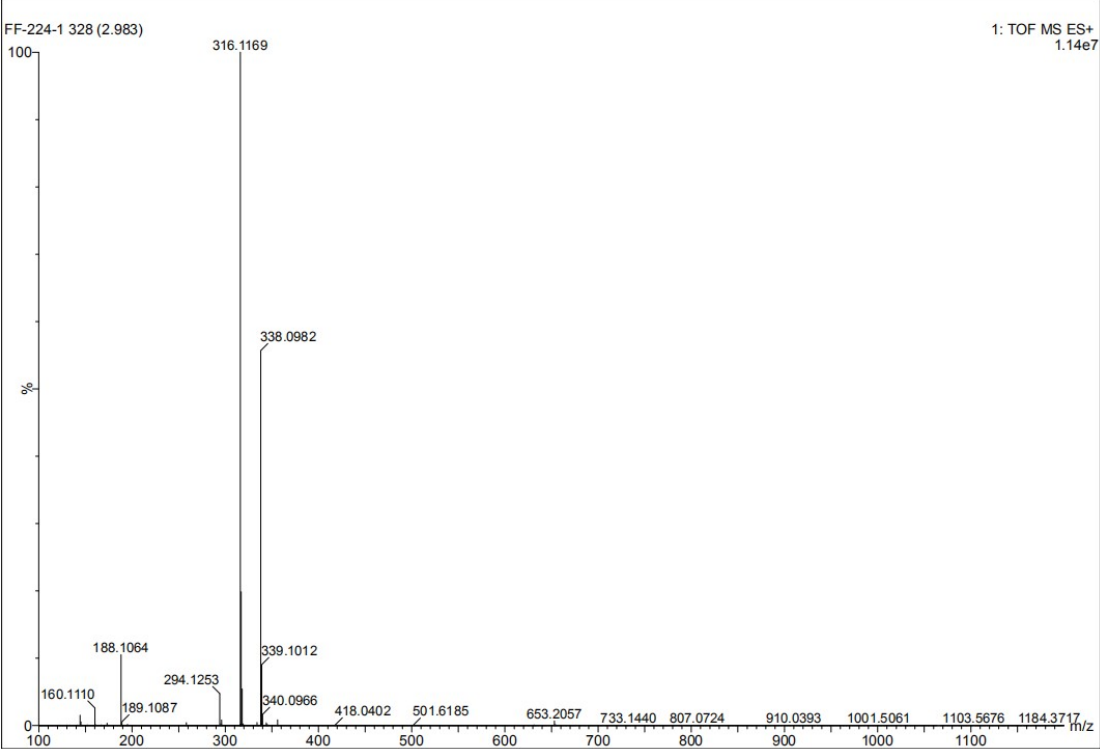

### 3-(((3-Fluorophenyl)thio)methyl)-1,3,5-trimethylindolin-2-one (3x)

<sup>1</sup>H NMR (600 MHz, CDCl<sub>3</sub>)

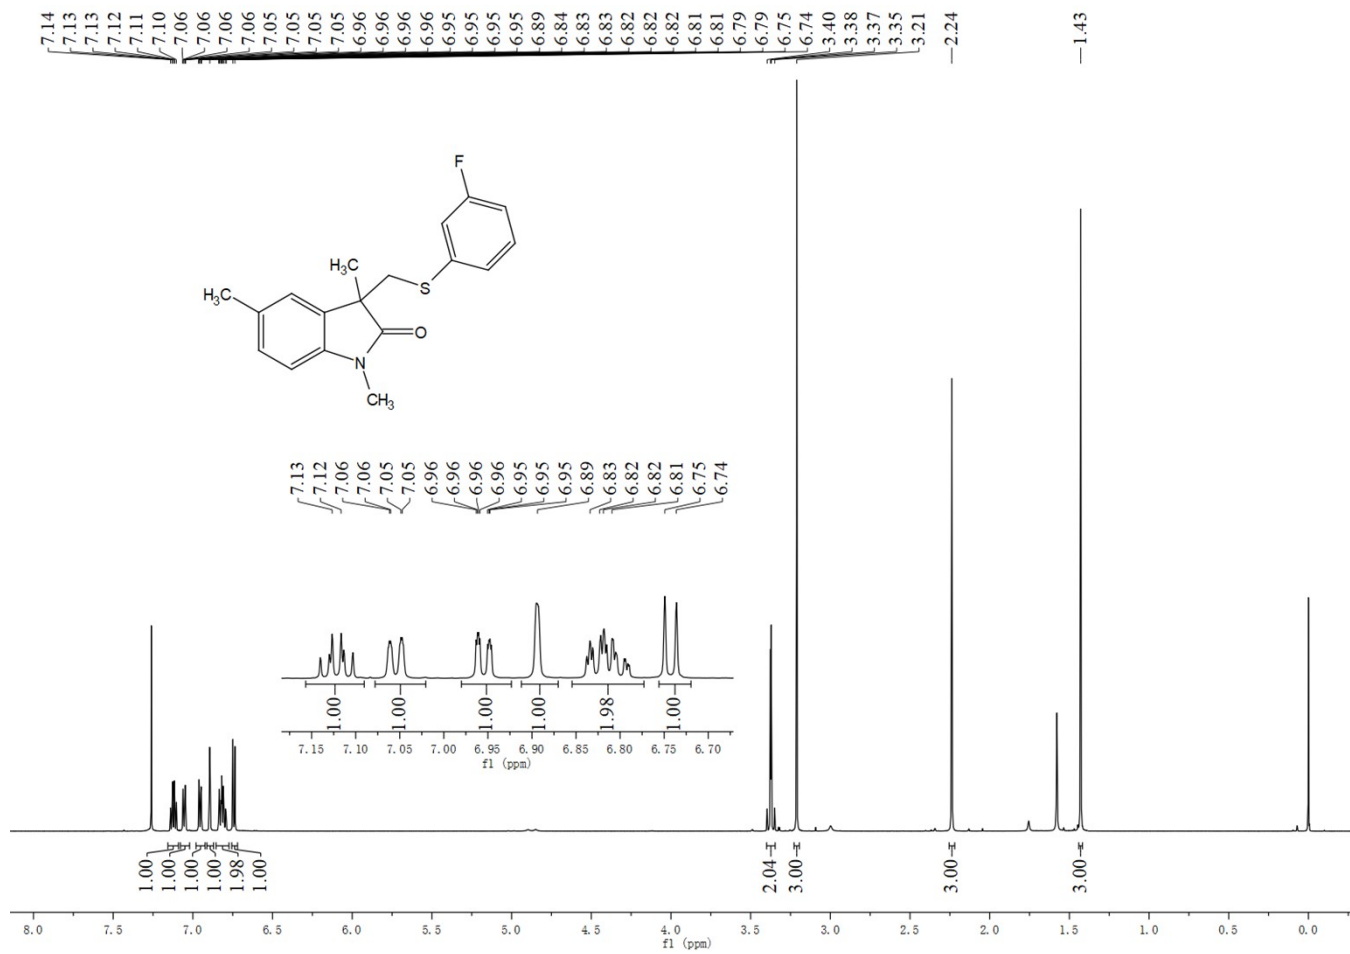

<sup>13</sup>C NMR (150 MHz, CDCl<sub>3</sub>)

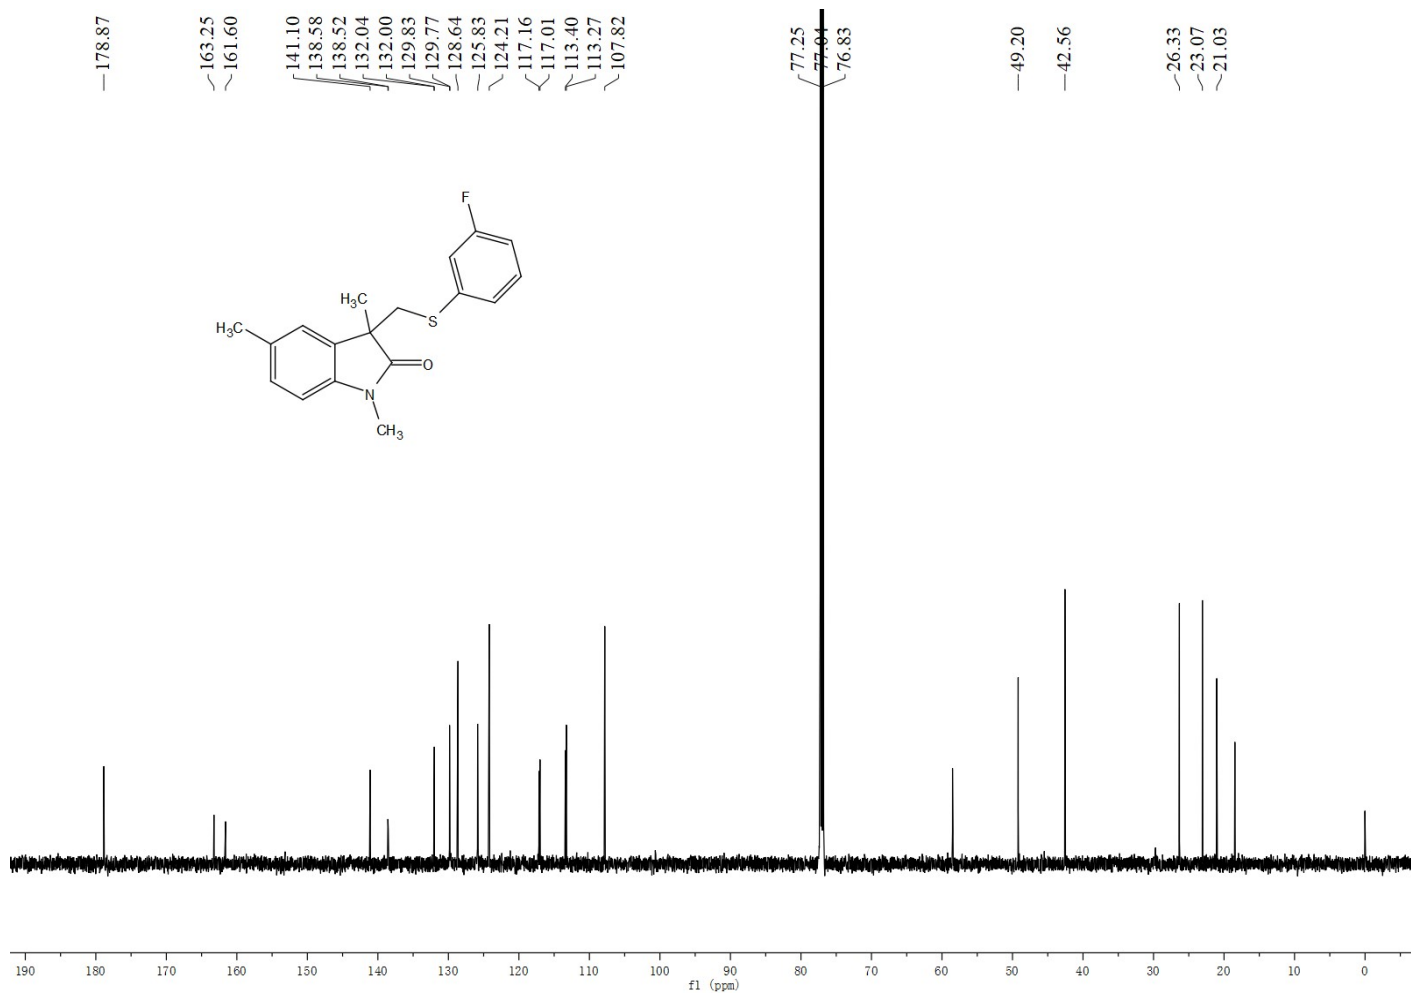

$^{19}\text{F}$  NMR (565 MHz,  $\text{CDCl}_3$ )

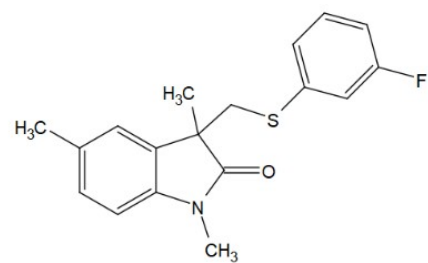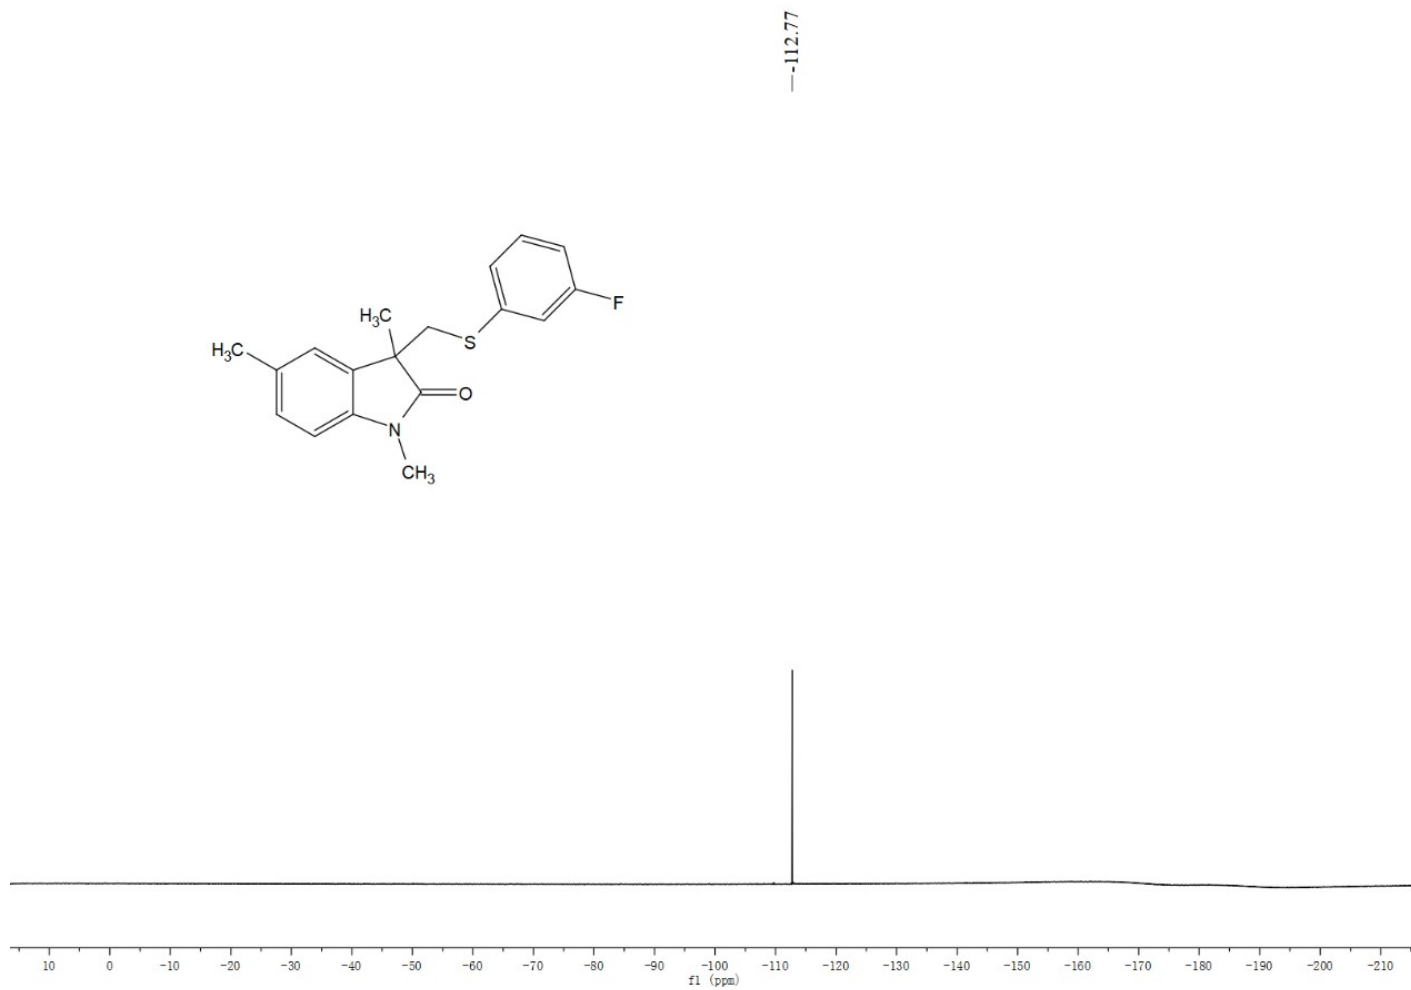

HRMS (ESI)

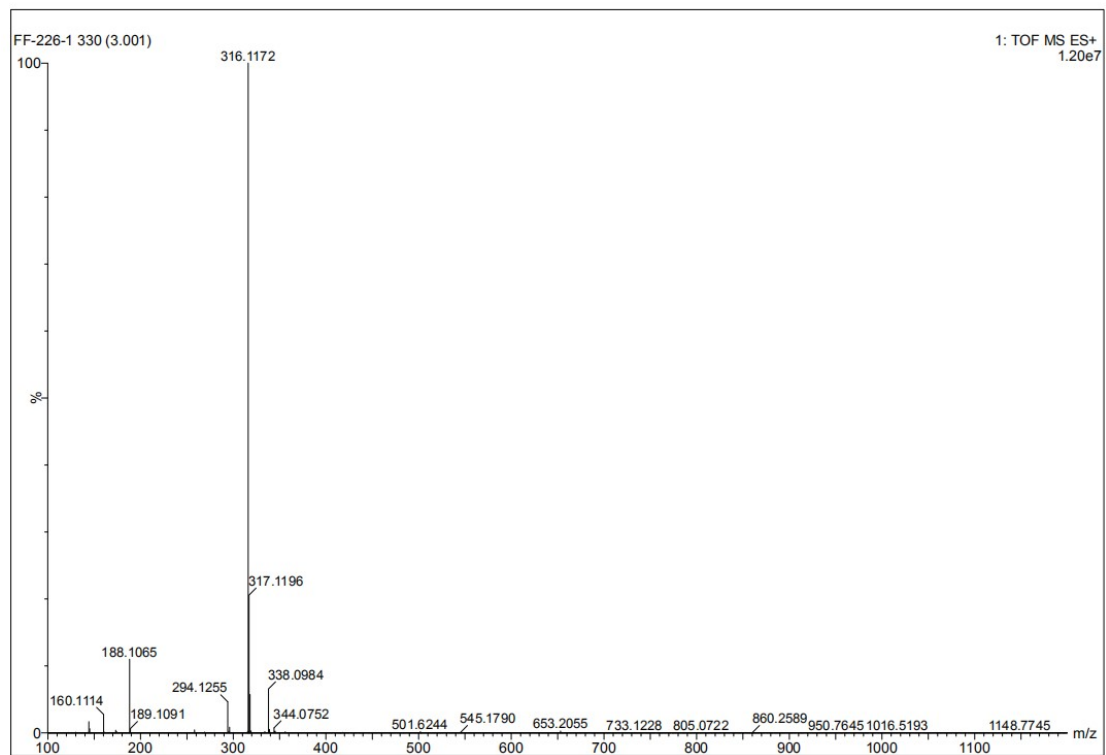

# 1,3,5-Trimethyl-3-((o-tolylthio)methyl)indolin-2-one (3y)

<sup>1</sup>H NMR (400 MHz, CDCl<sub>3</sub>)

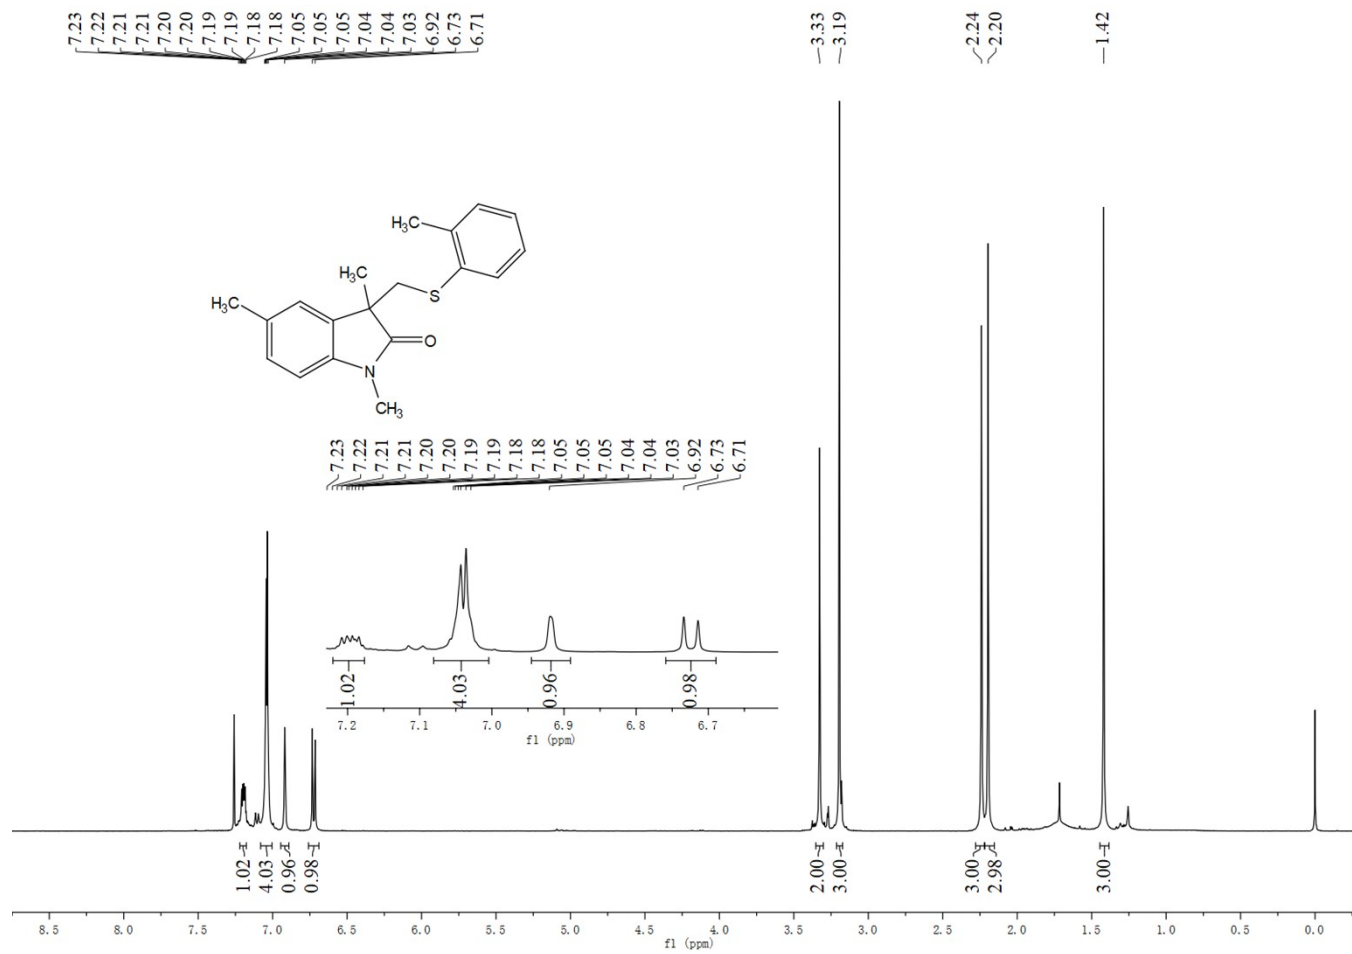

<sup>13</sup>C NMR (100 MHz, CDCl<sub>3</sub>)

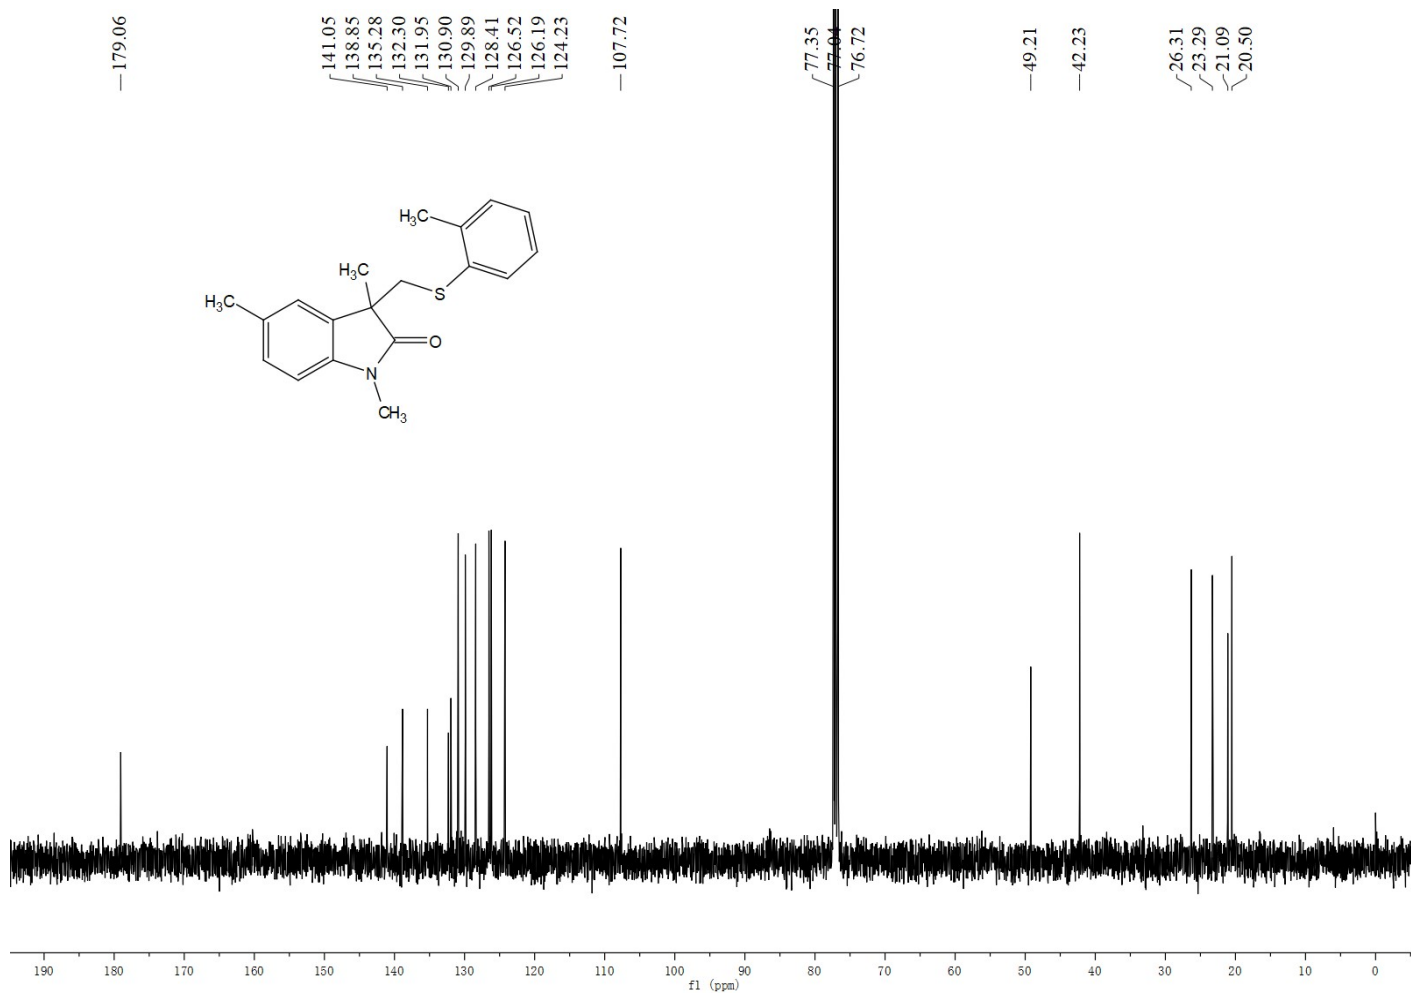



HRMS (ESI)

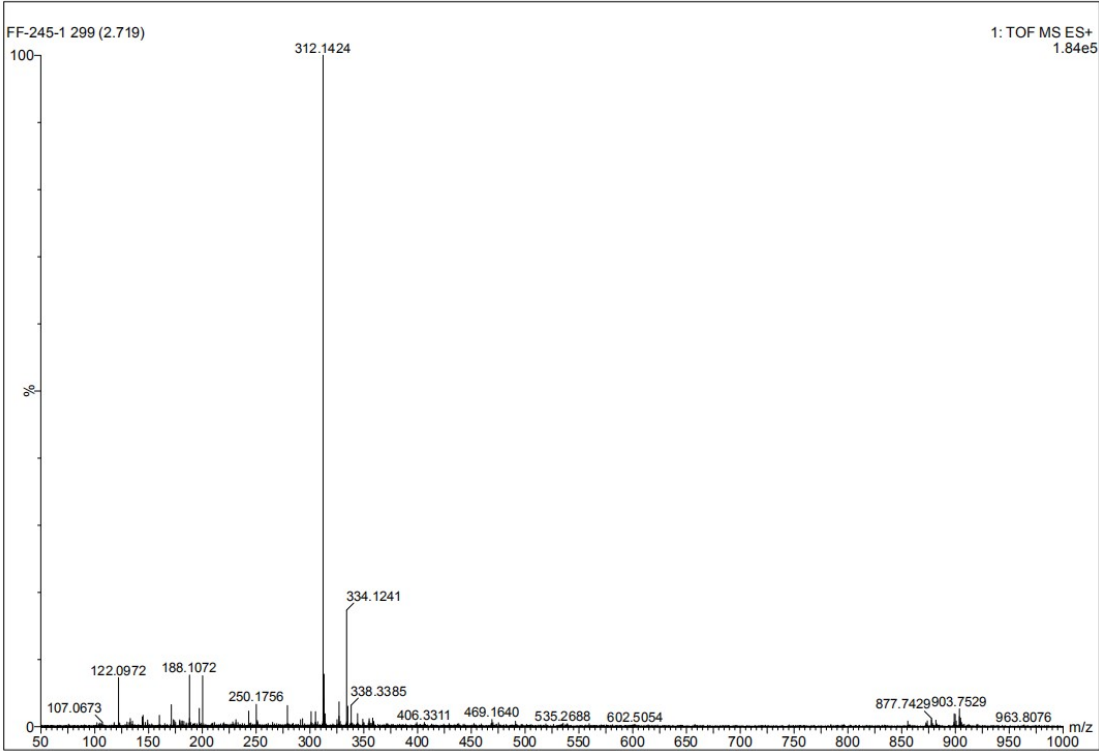

### 3-(((3,5-Dichlorophenyl)thio)methyl)-1,3,5-trimethylindolin-2-one (3z)

$^1\text{H}$  NMR (600 MHz,  $\text{CDCl}_3$ )

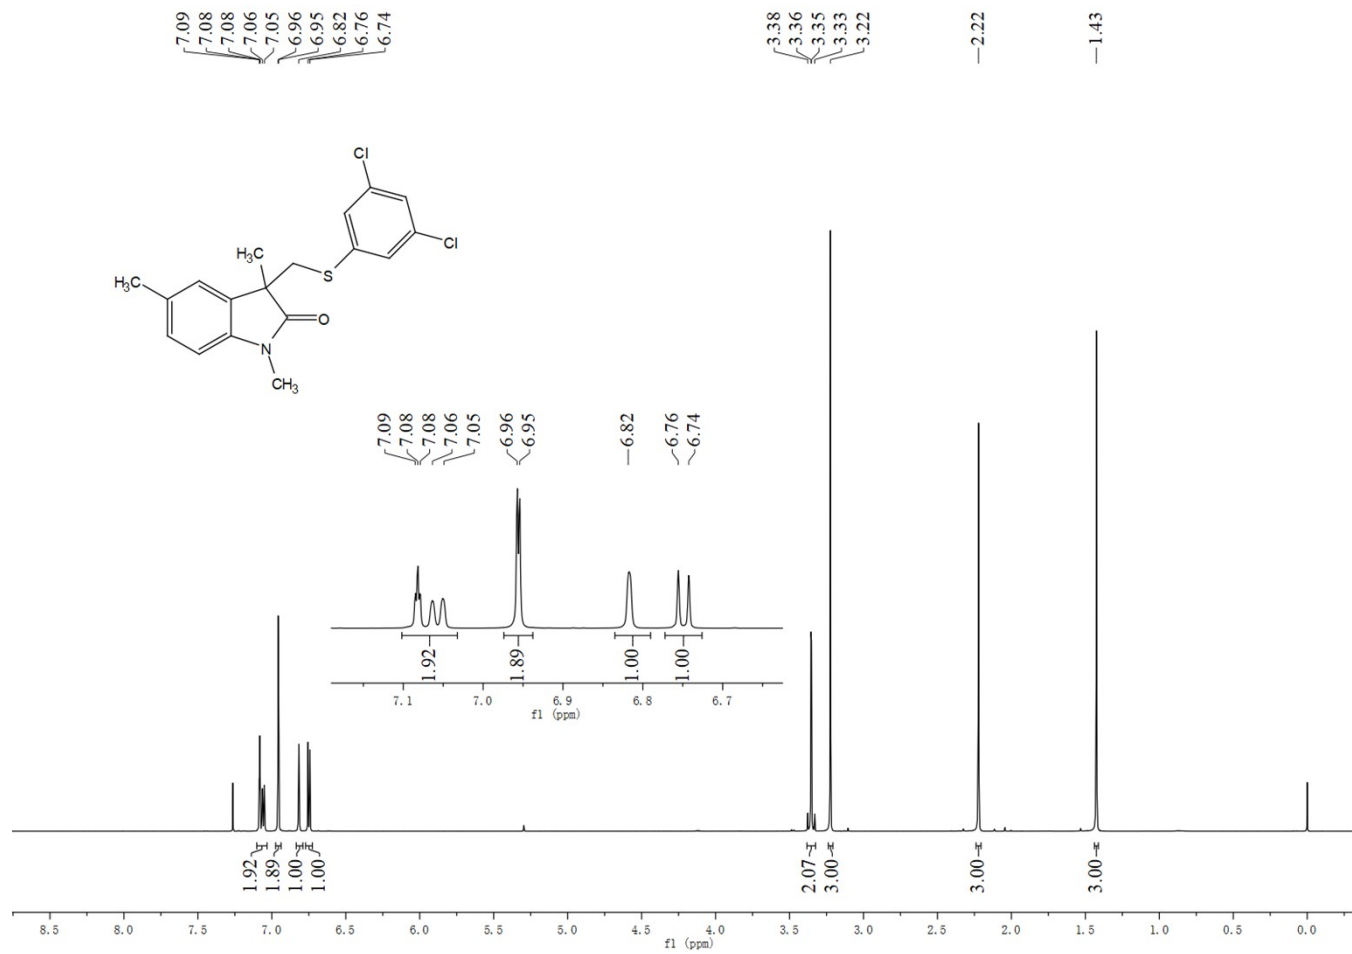

$^{13}\text{C}$  NMR (150 MHz,  $\text{CDCl}_3$ )

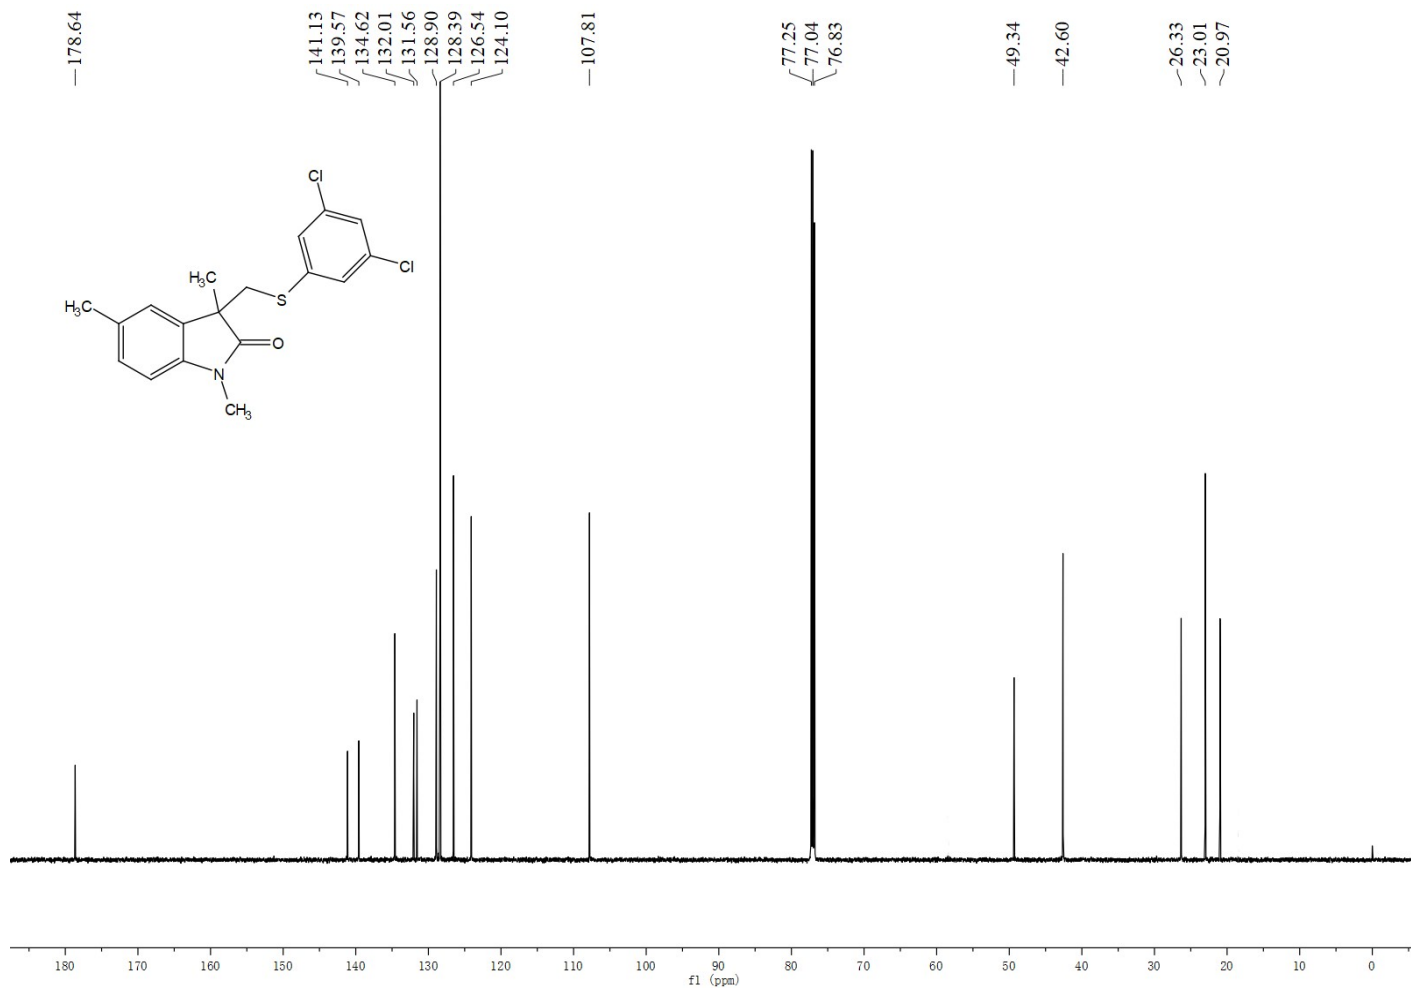

HRMS (ESI)

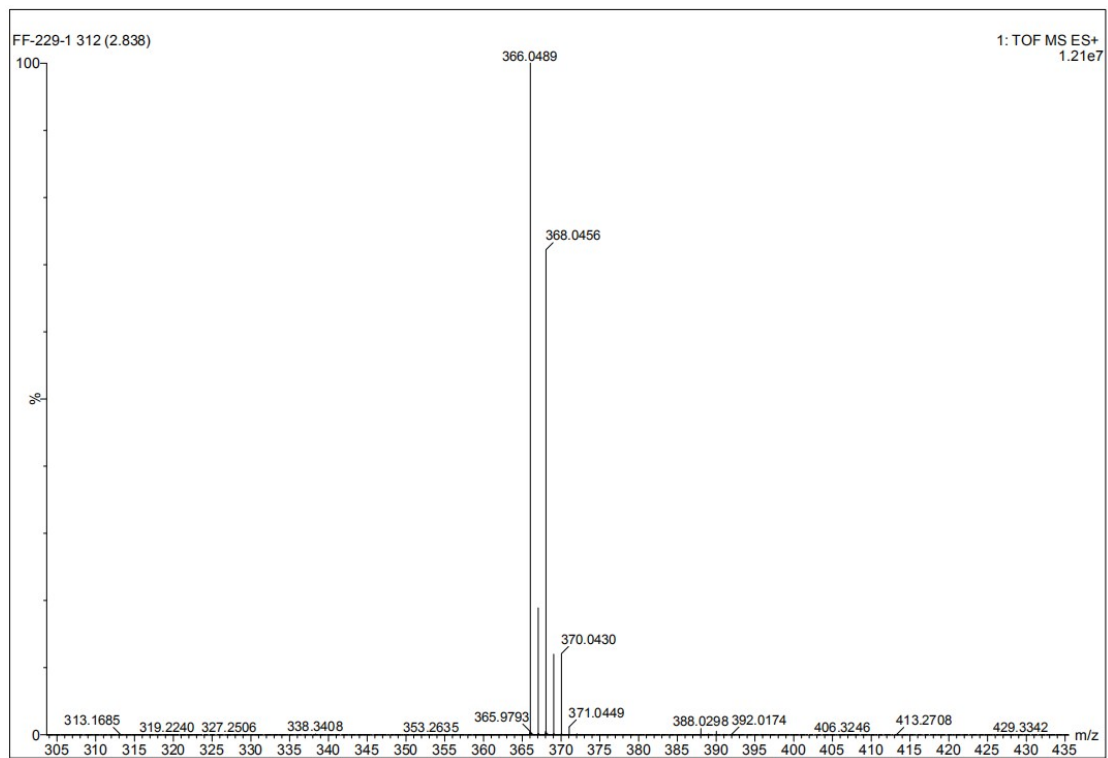

**(Z)-1-Methyl-3-(1-(phenylthio)ethylidene)indolin-2-one (3a)**

<sup>1</sup>H NMR (400 MHz, CDCl<sub>3</sub>)

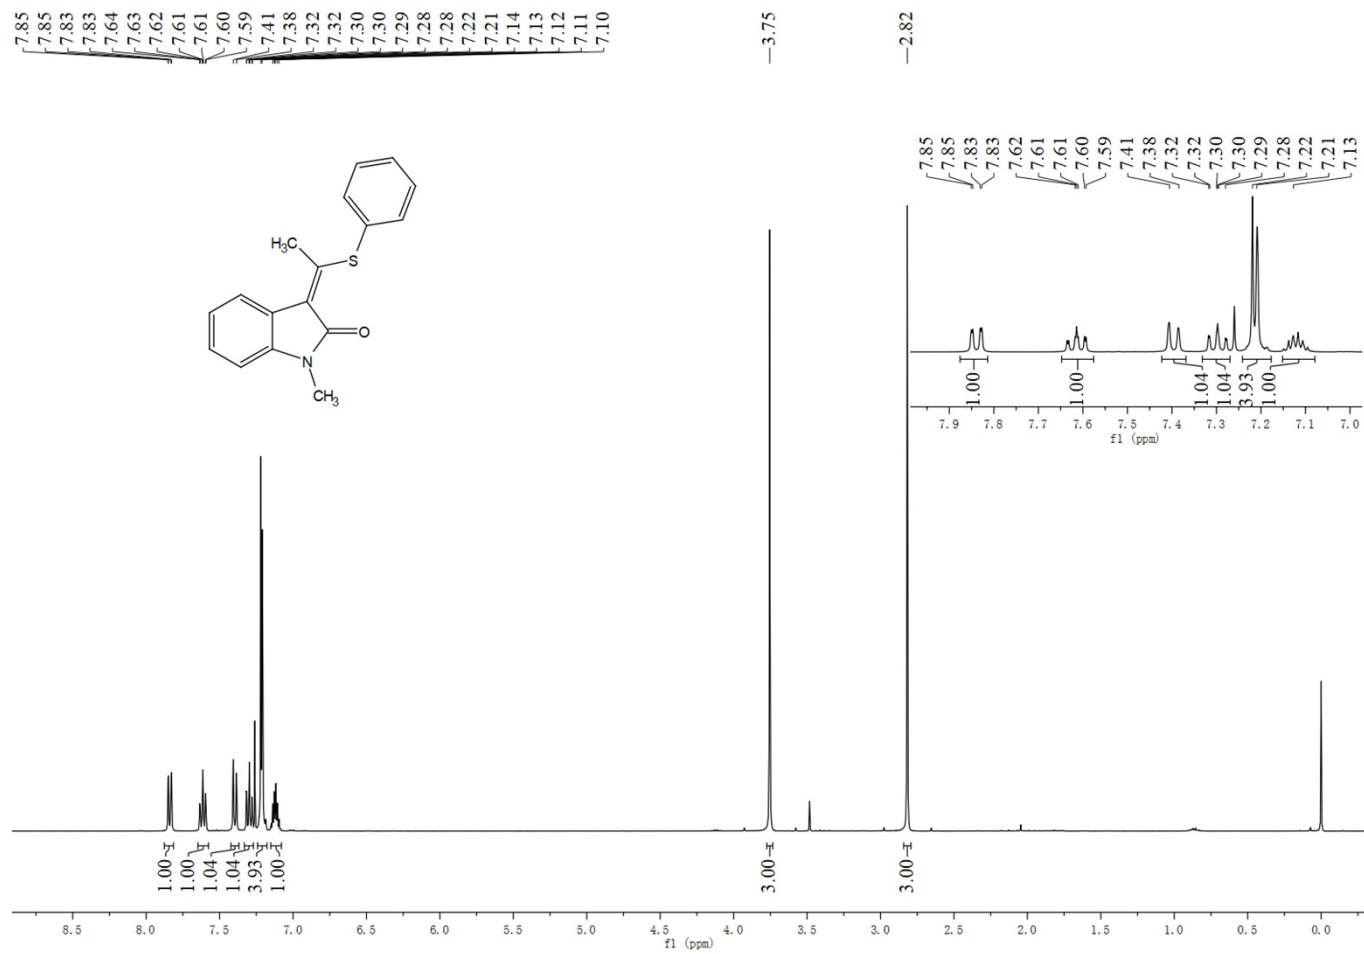

<sup>13</sup>C NMR (100 MHz, CDCl<sub>3</sub>)

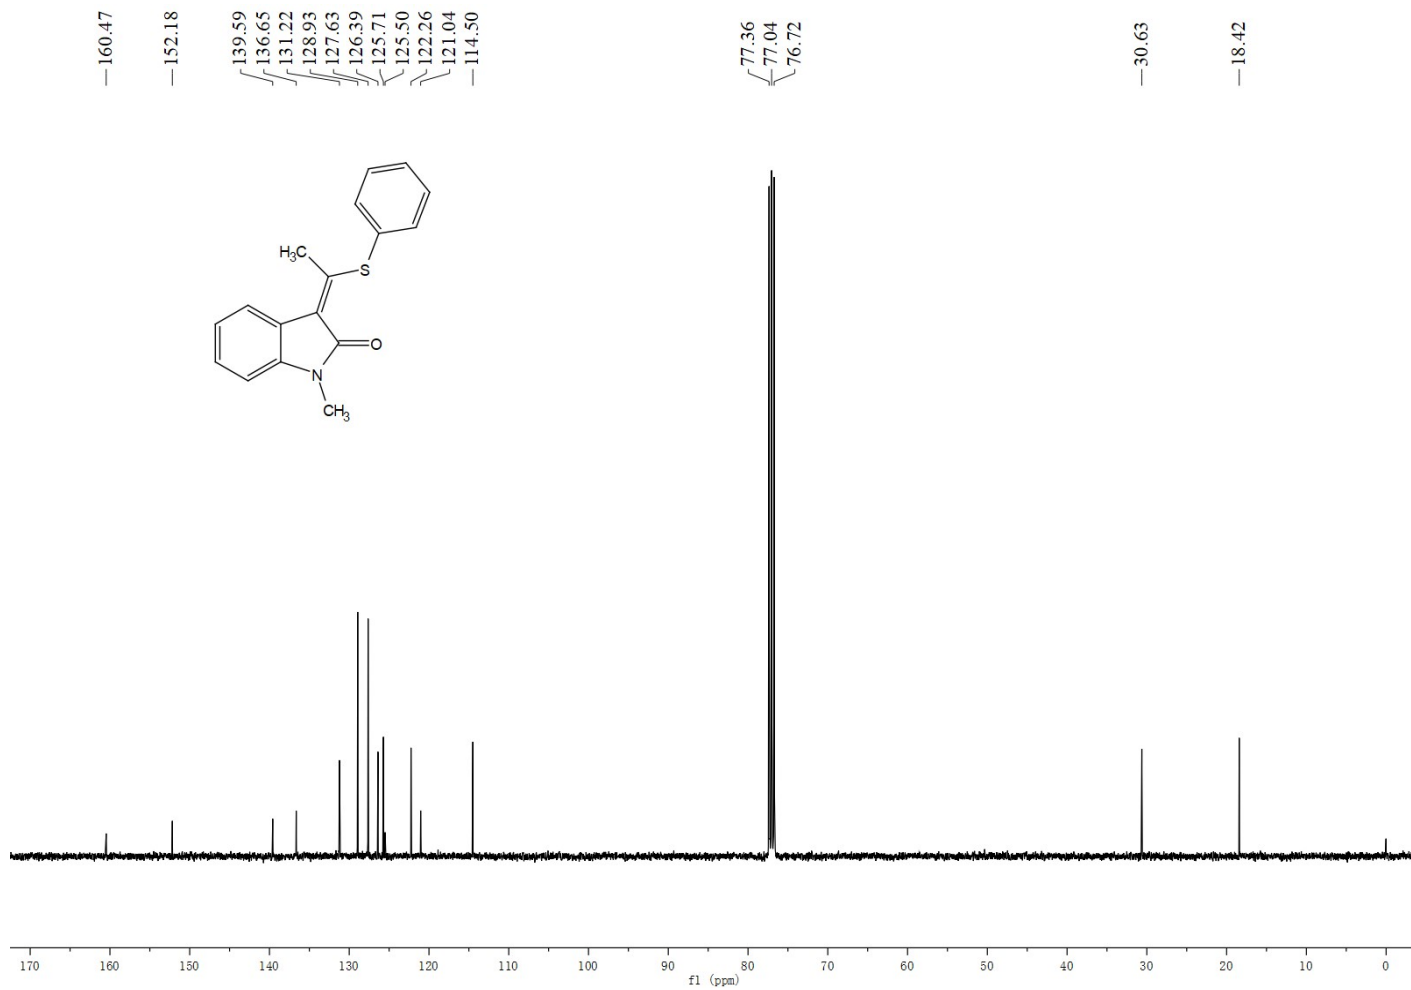

HRMS (ESI)

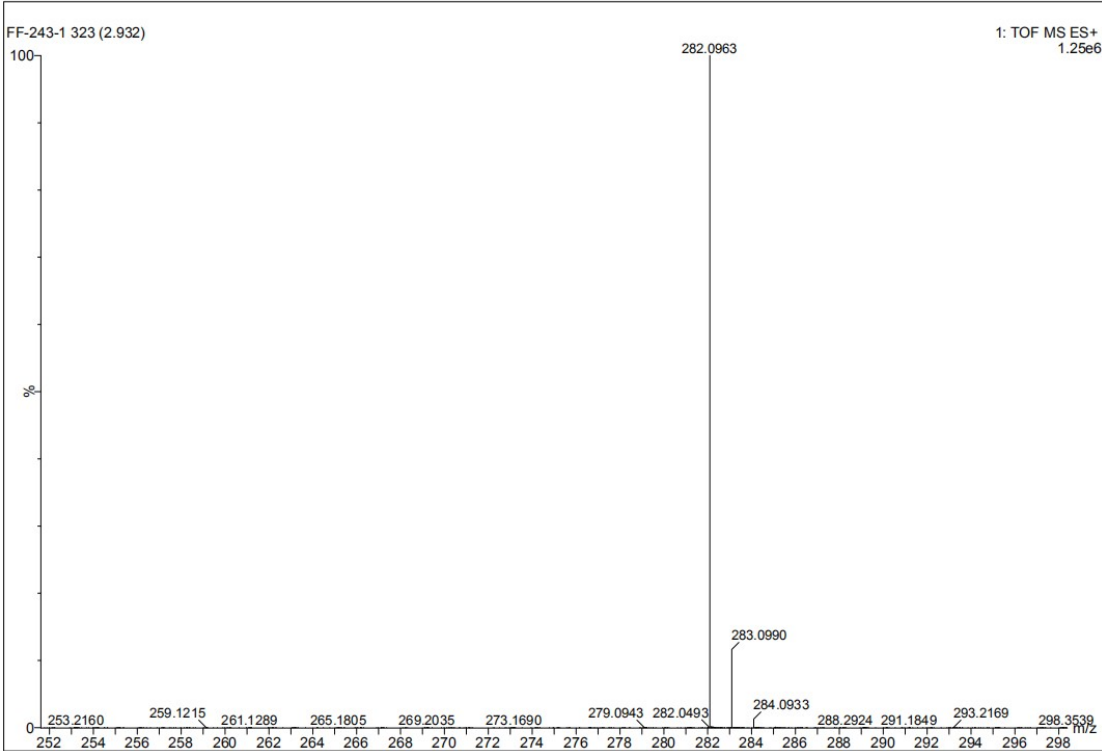

### 3-((Butylthio)methyl)-1,3,5-trimethylindolin-2-one (3ab)

$^1\text{H}$  NMR (400 MHz,  $\text{CDCl}_3$ )

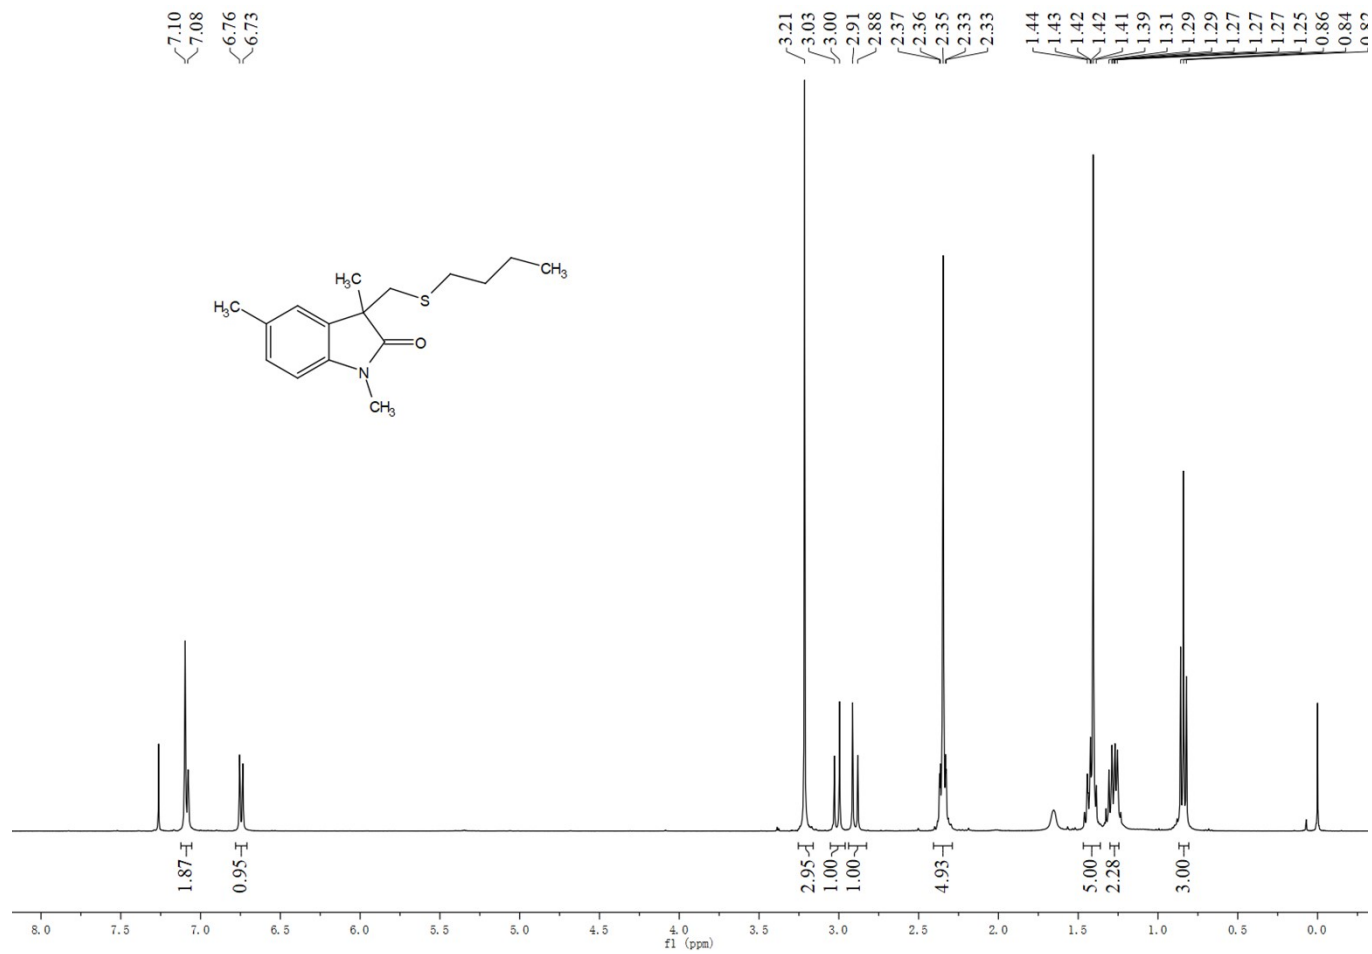



<sup>13</sup>C NMR (100 MHz, CDCl<sub>3</sub>)

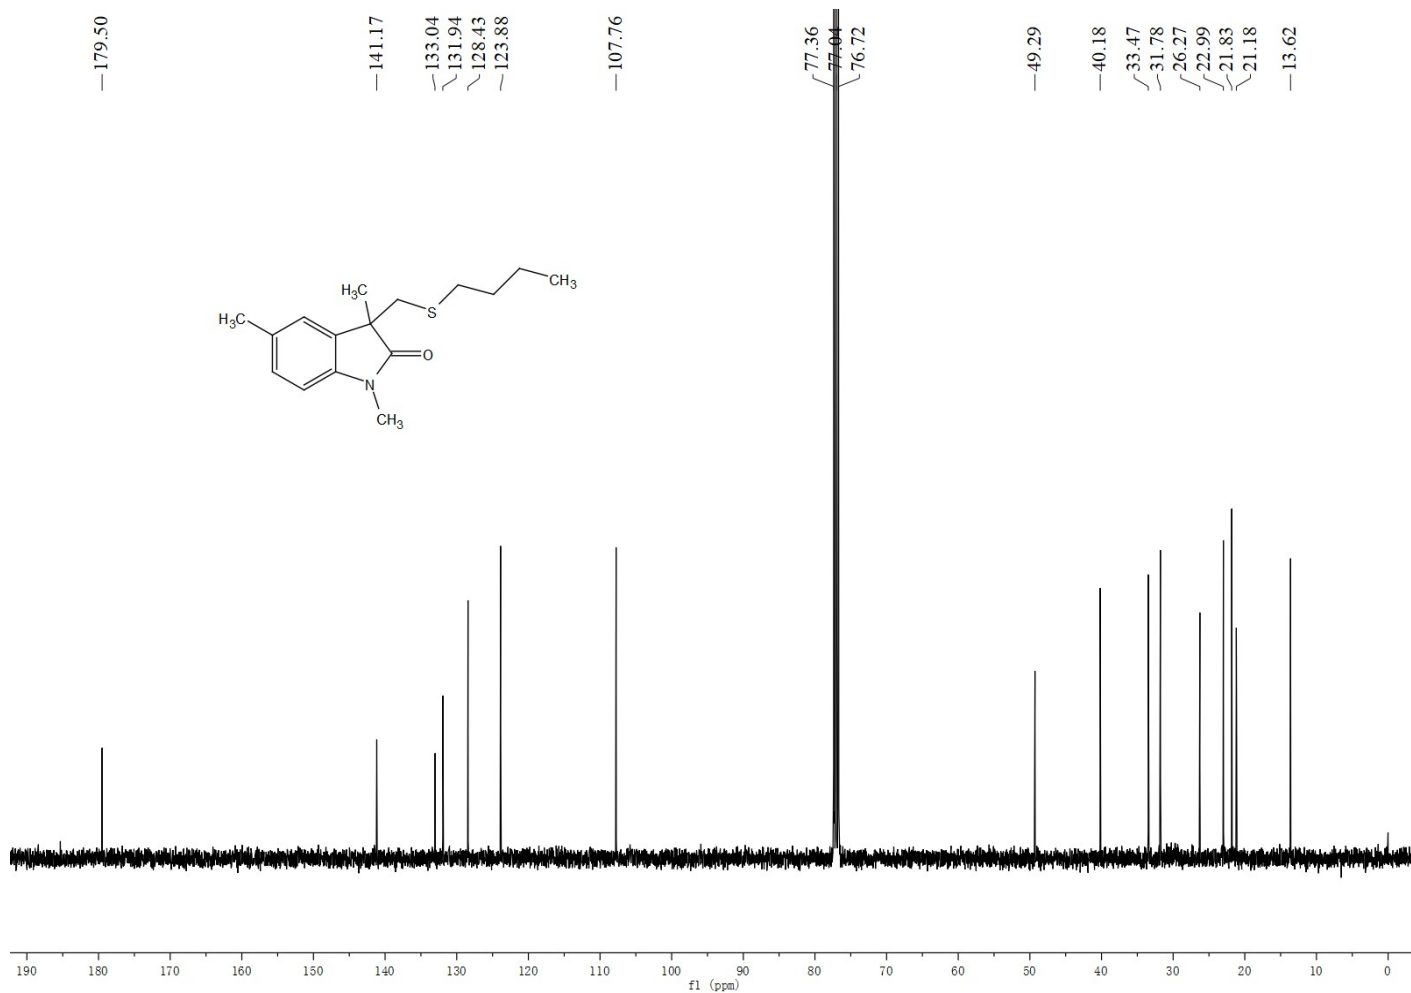

HRMS (ESI)

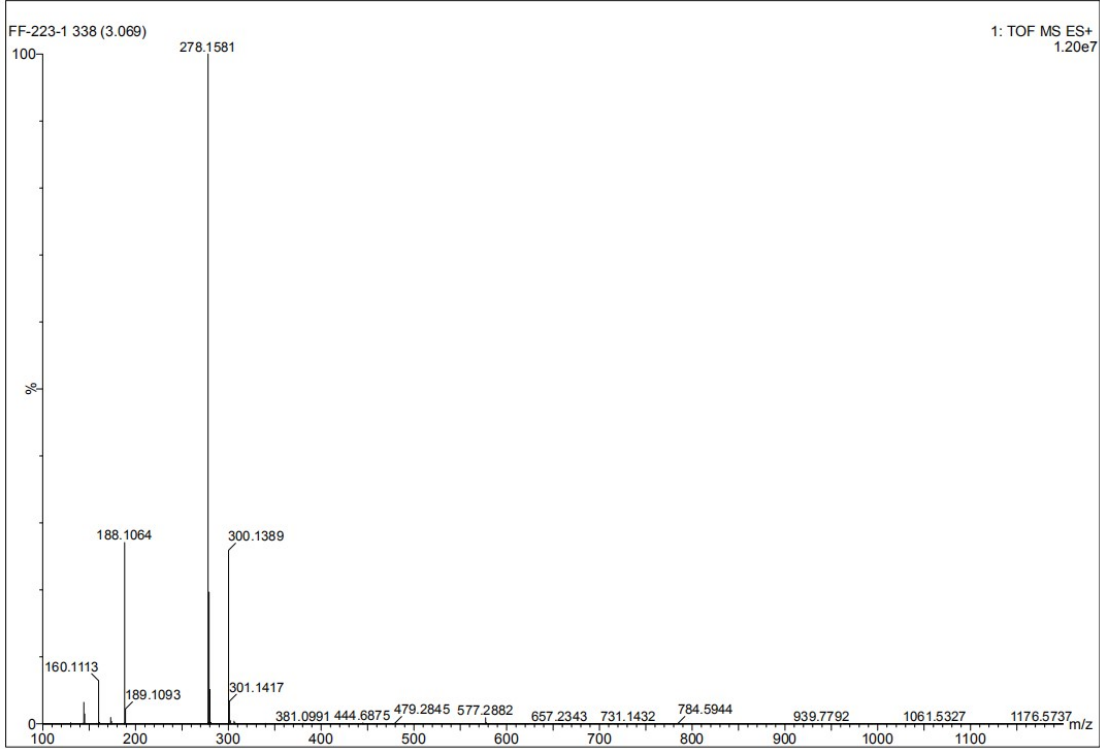

**1,3,5-Trimethyl-3-((phenylselanyl)methyl)indolin-2-one (3ac)**

<sup>1</sup>H NMR (400 MHz, CDCl<sub>3</sub>)

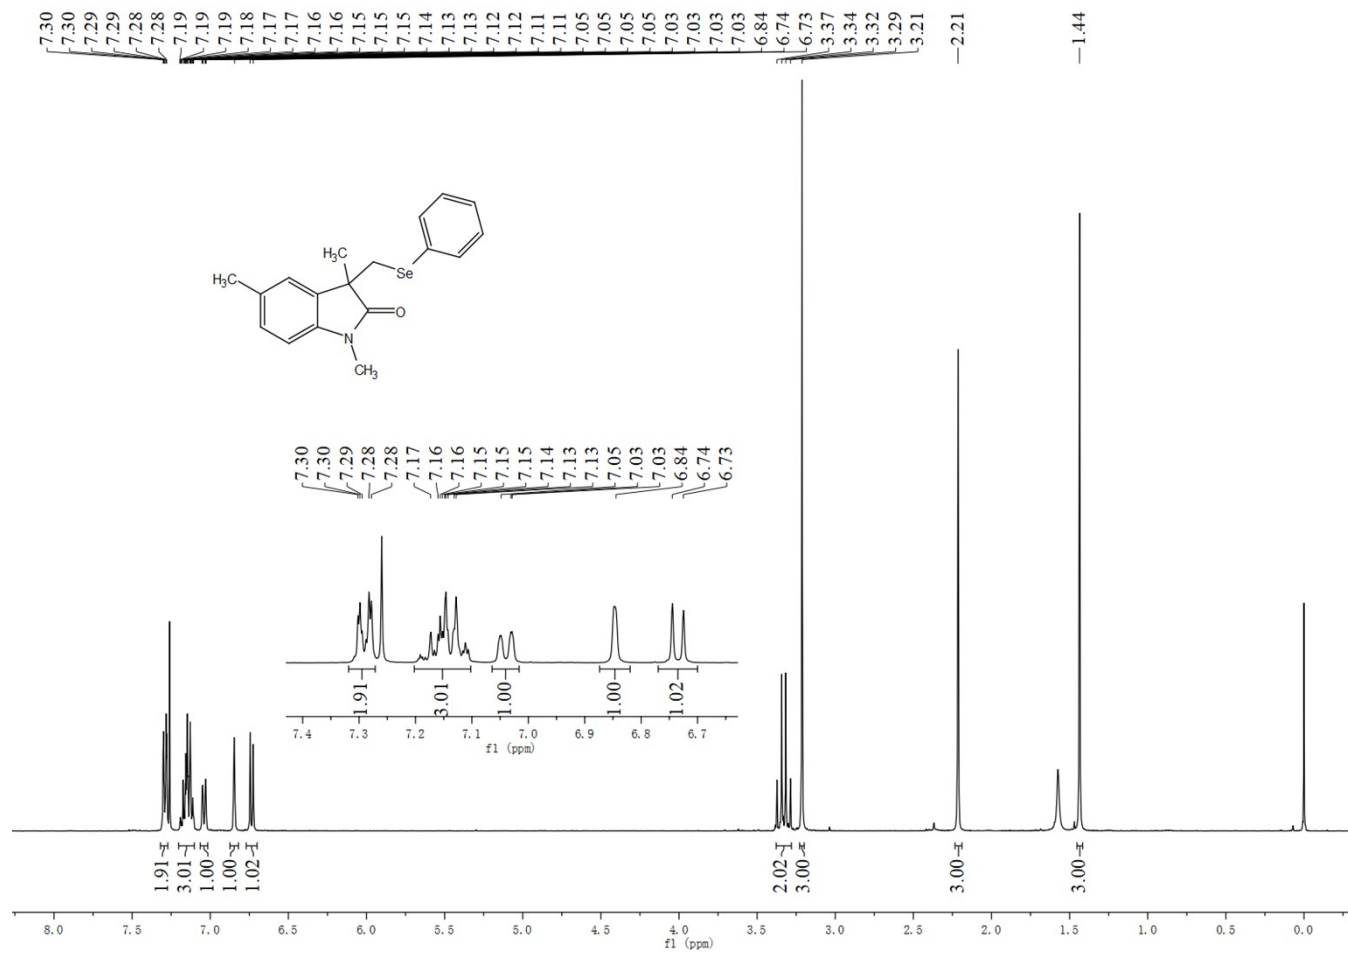

<sup>13</sup>C NMR (100 MHz, CDCl<sub>3</sub>)

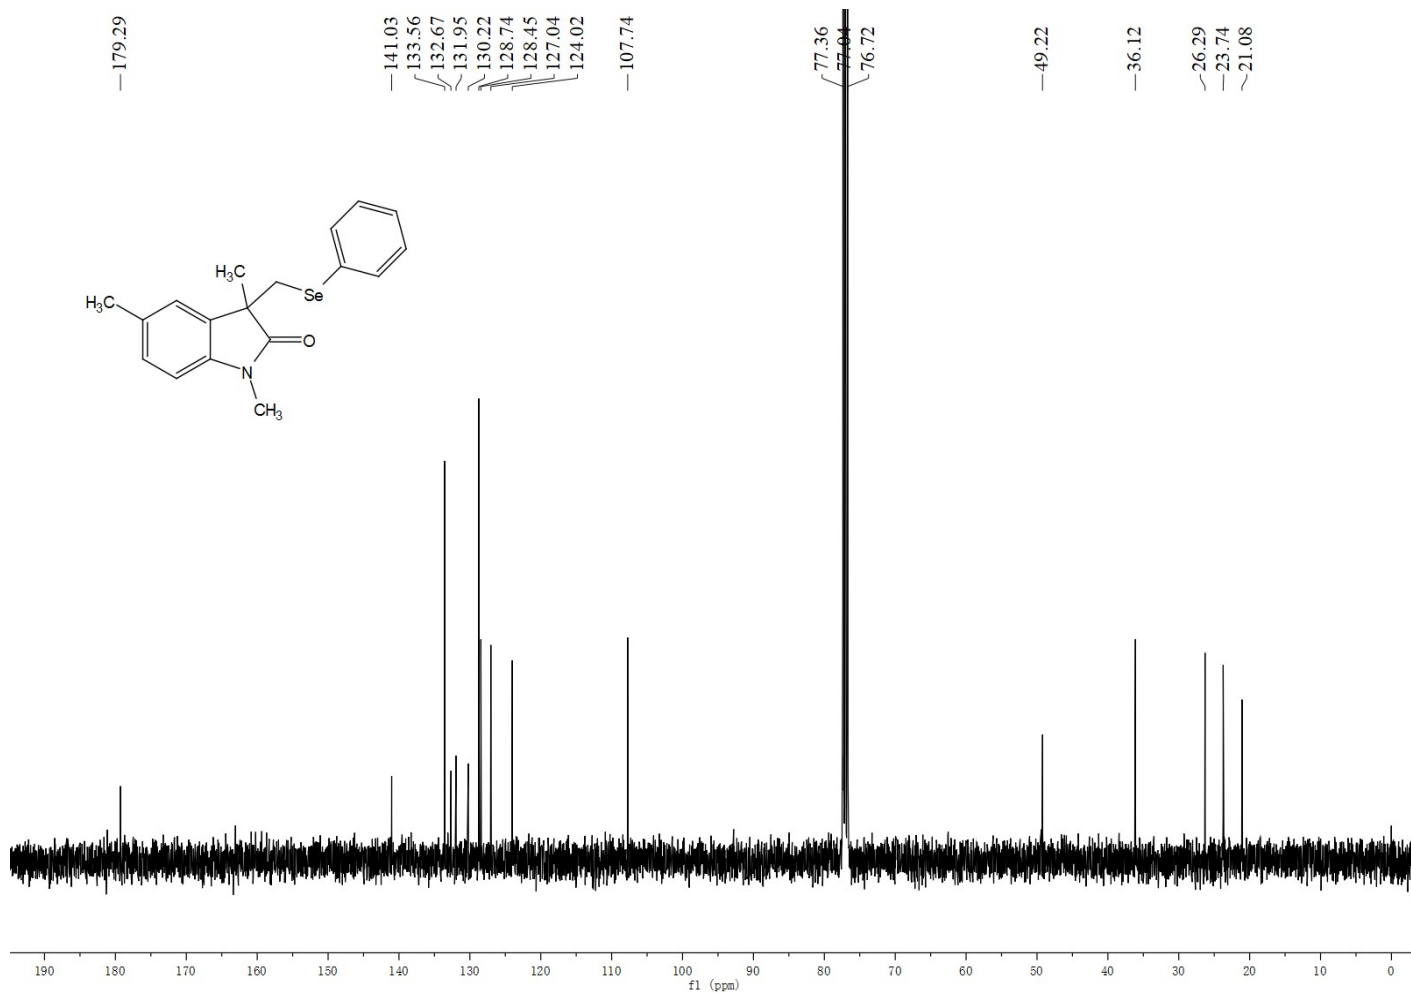

HRMS (ESI)

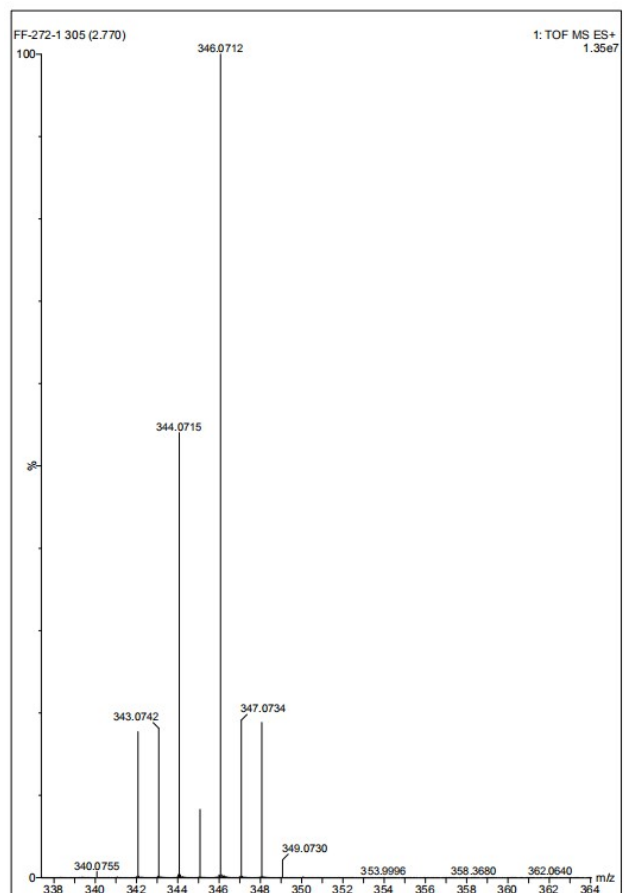

### 3-(((4-Fluorophenyl)selenanyl)methyl)-1,3,5-trimethylindolin-2-one (3ad)

$^1\text{H}$  NMR (600 MHz,  $\text{CDCl}_3$ )

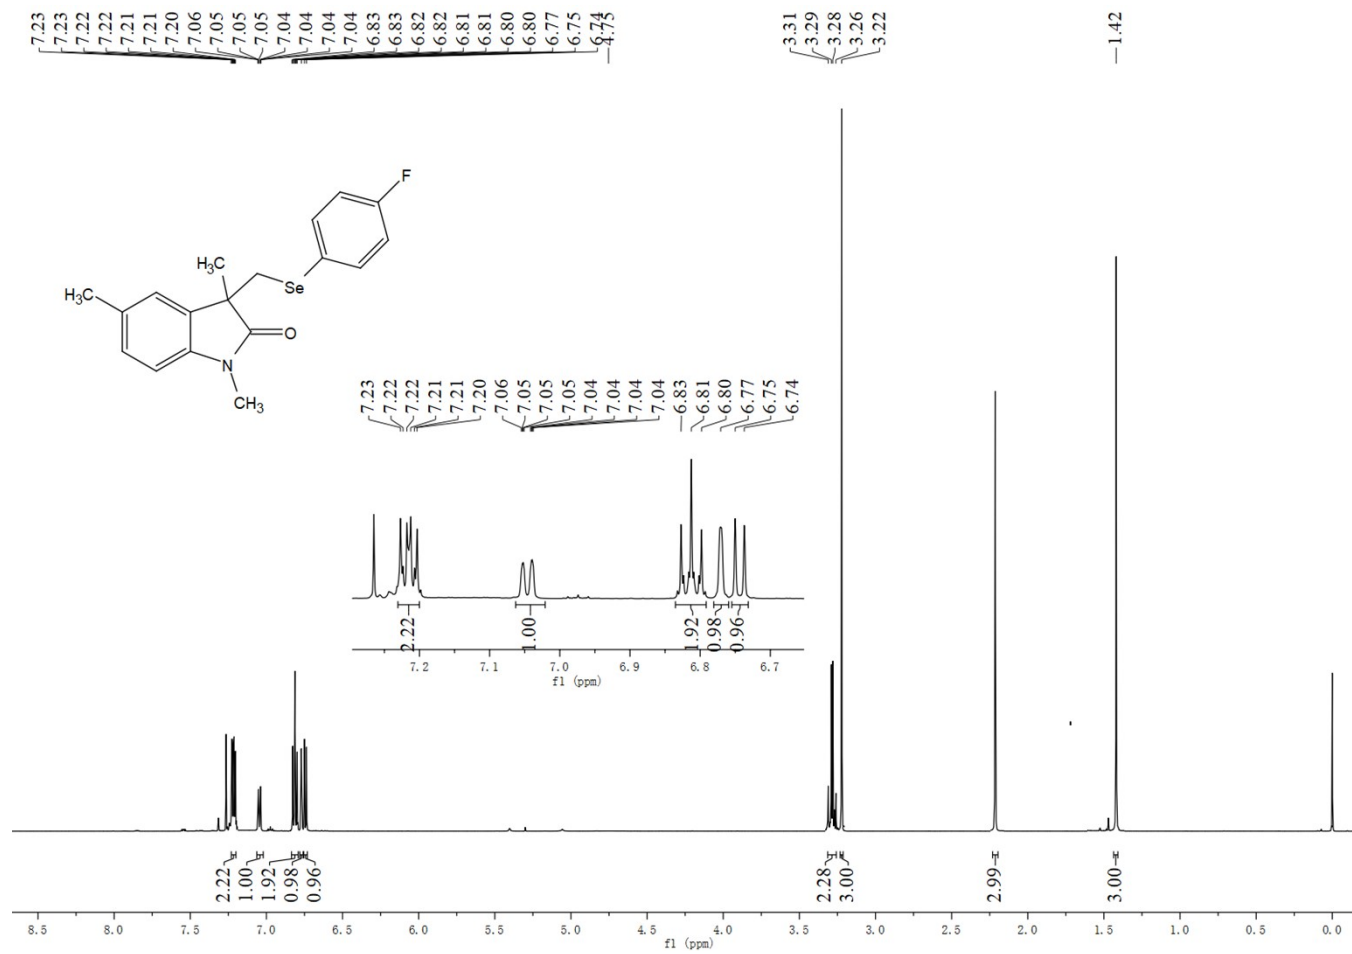

<sup>13</sup>C NMR (150 MHz, CDCl<sub>3</sub>)

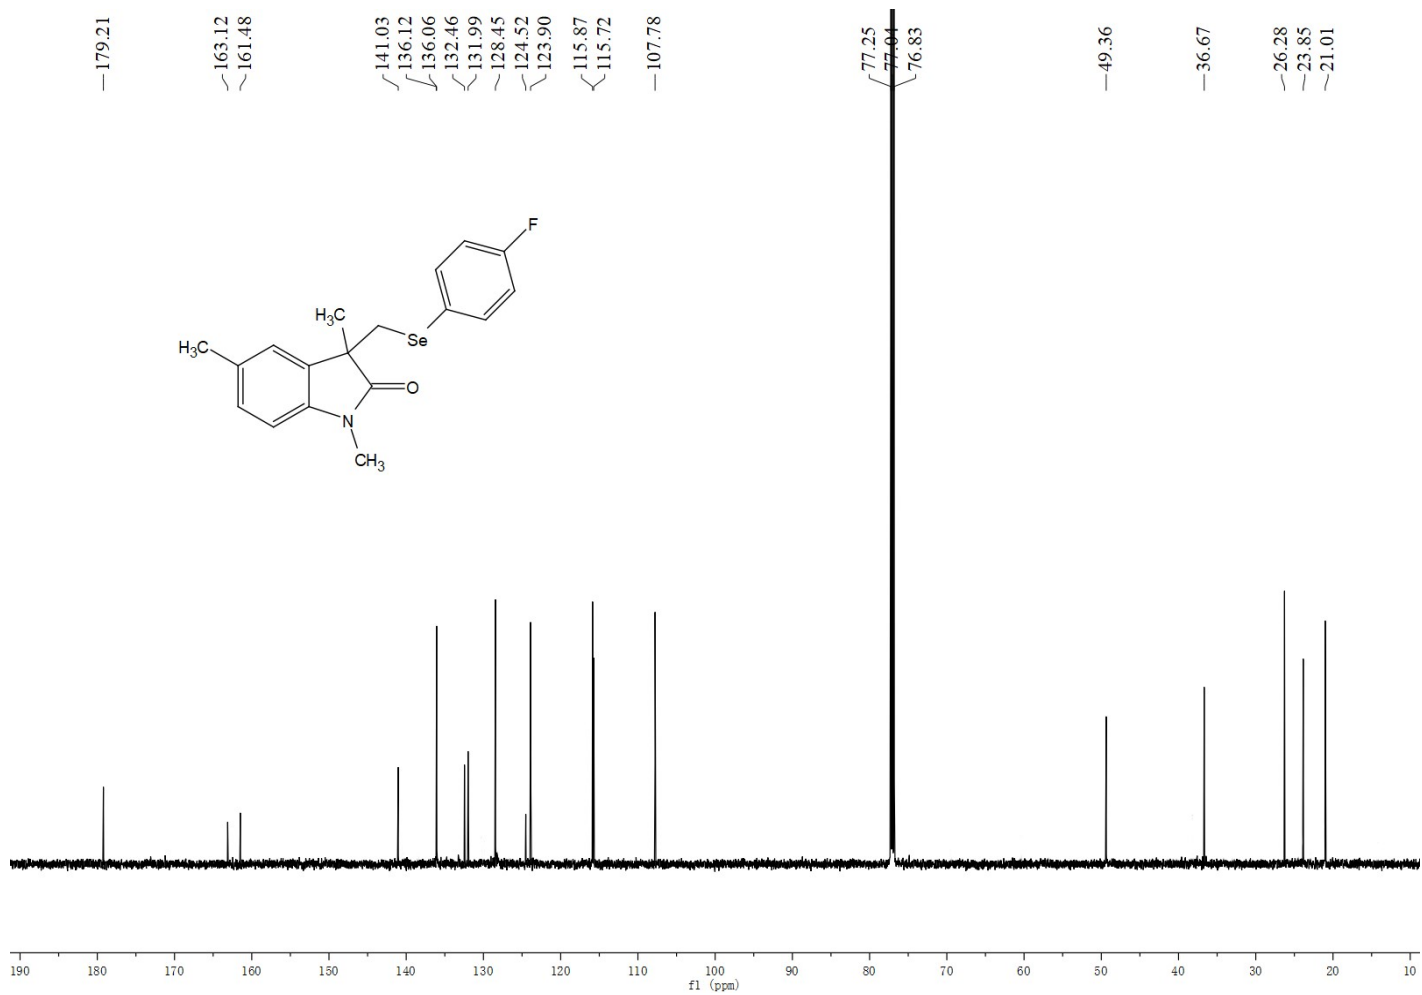

$^{19}\text{F}$  NMR (565 MHz,  $\text{CDCl}_3$ )

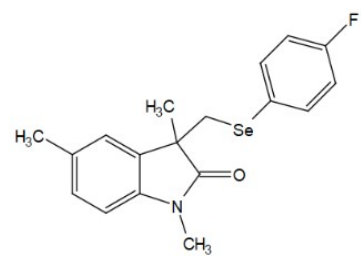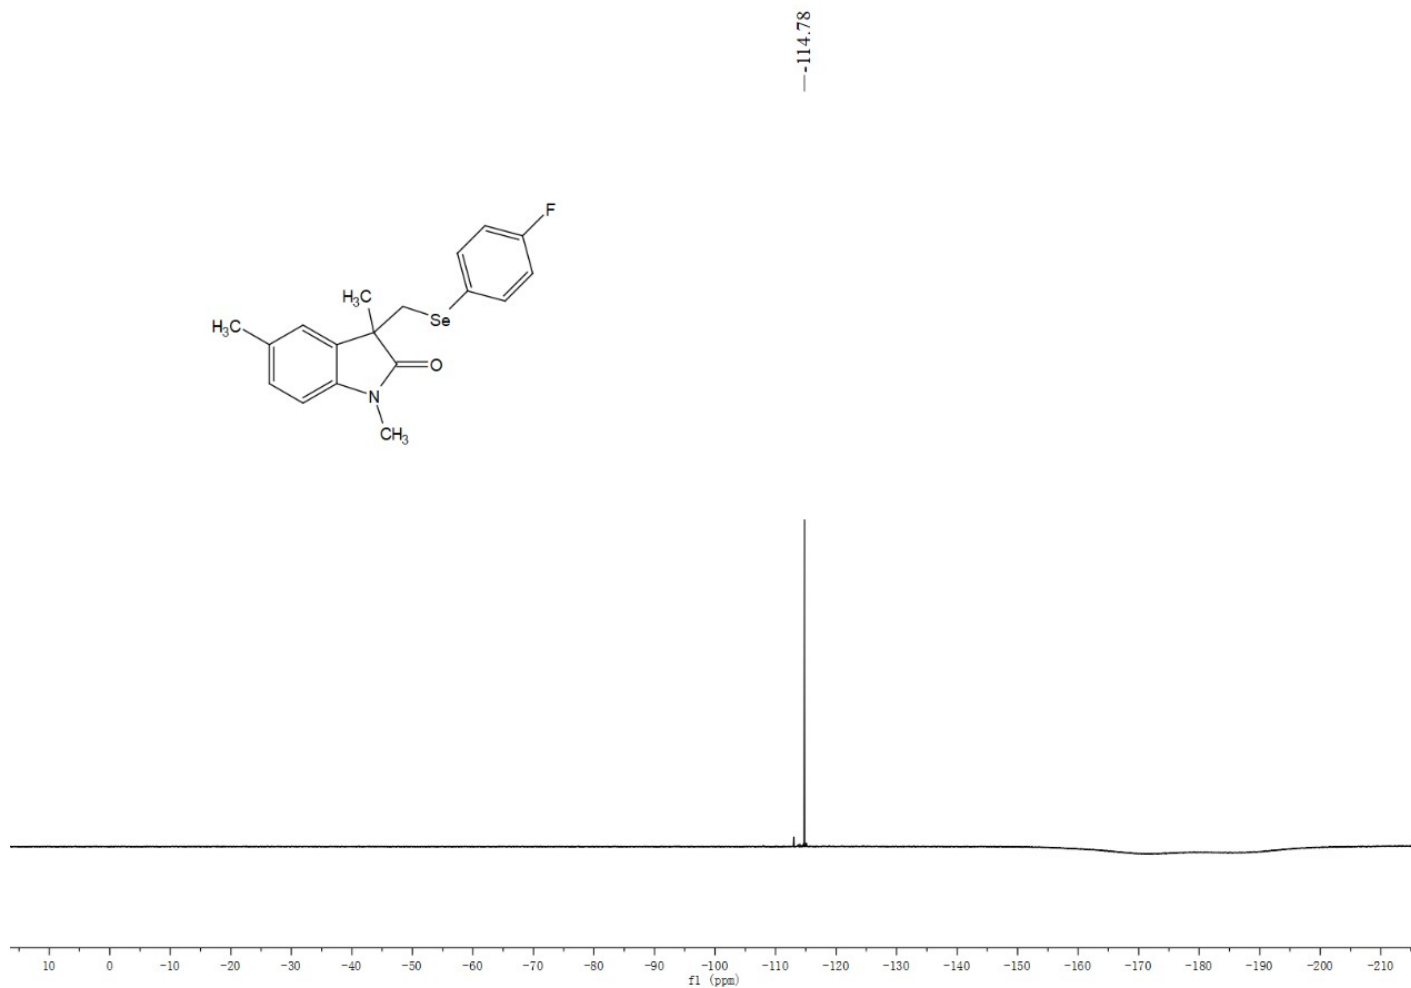



HRMS (ESI)

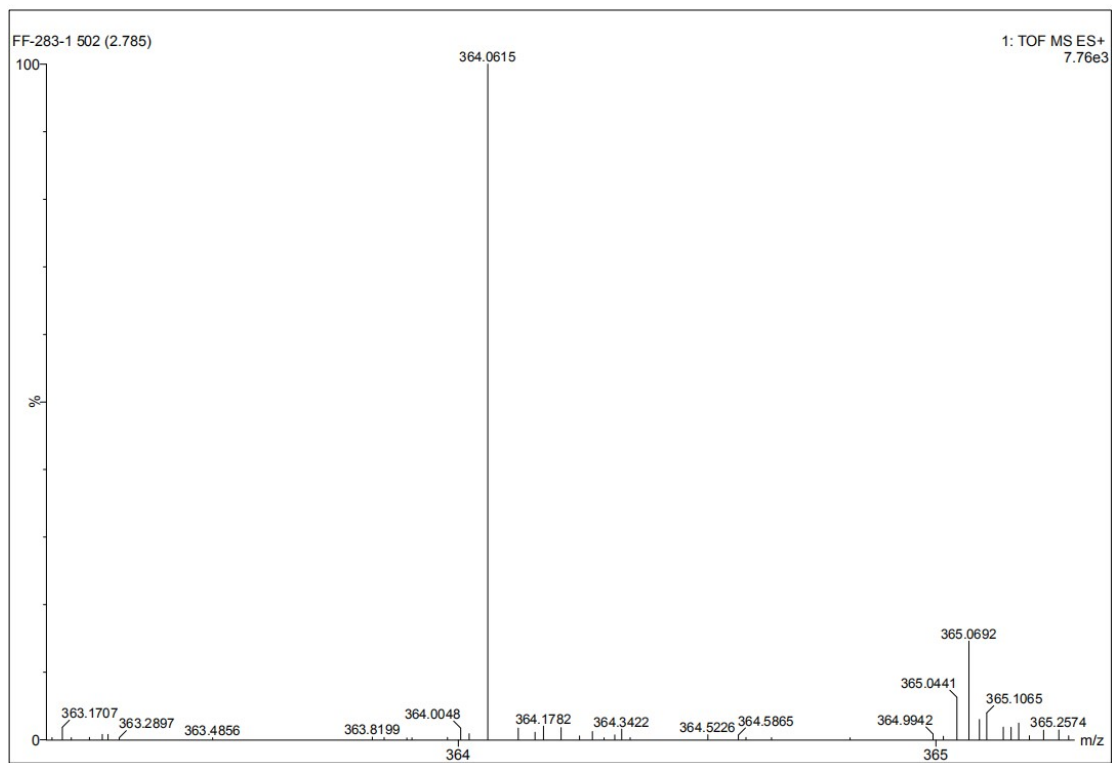



### 3-(((4-Bromophenyl)selenanyl)methyl)-1,3,5-trimethylindolin-2-one (3ae)

$^1\text{H}$  NMR (400 MHz,  $\text{CDCl}_3$ )

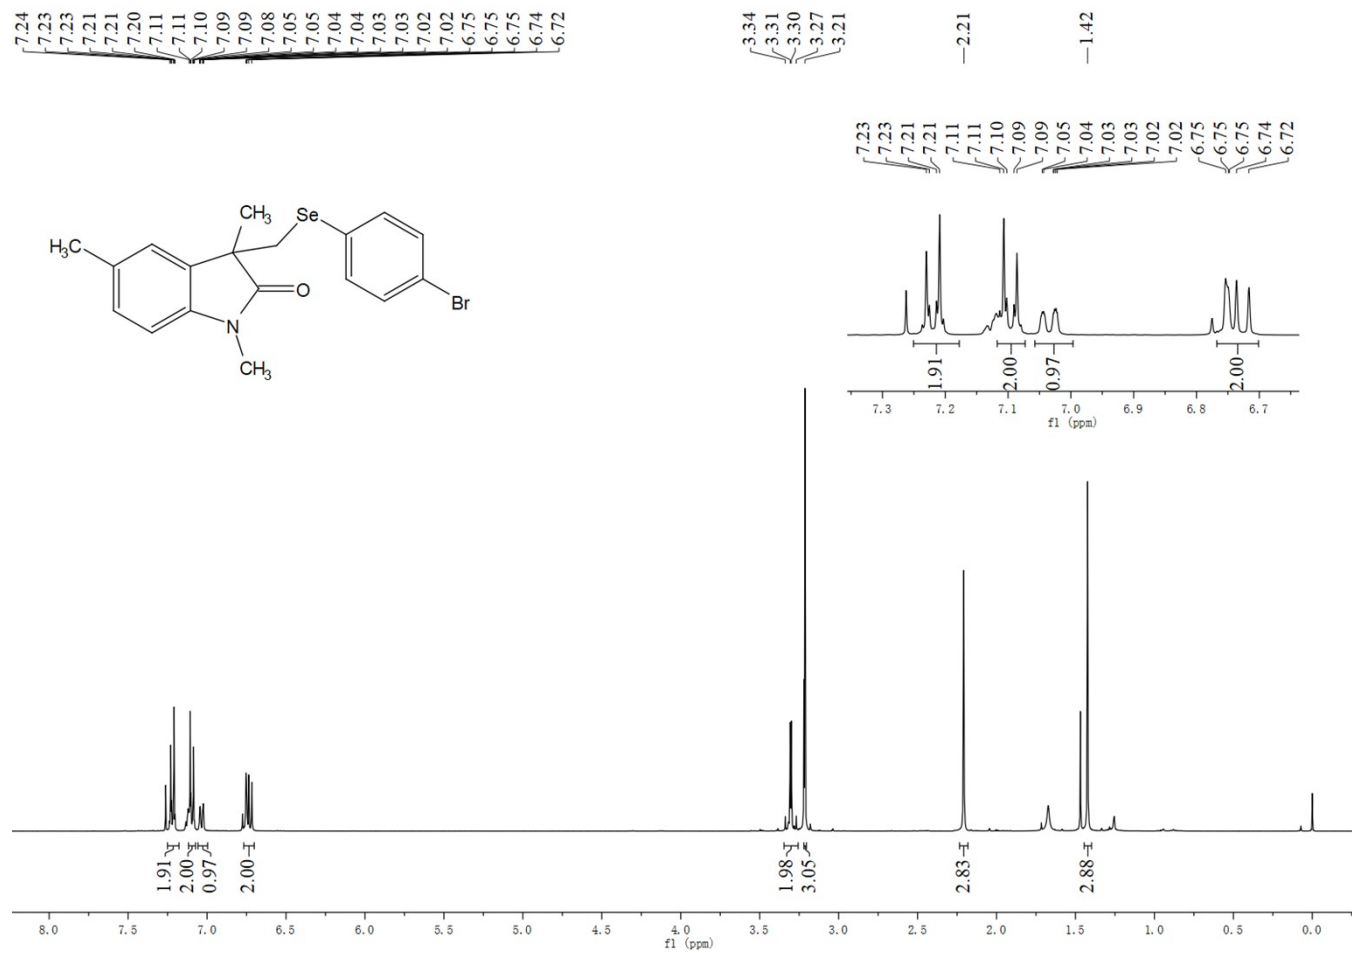

$^{13}\text{C}$  NMR (100 MHz,  $\text{CDCl}_3$ )

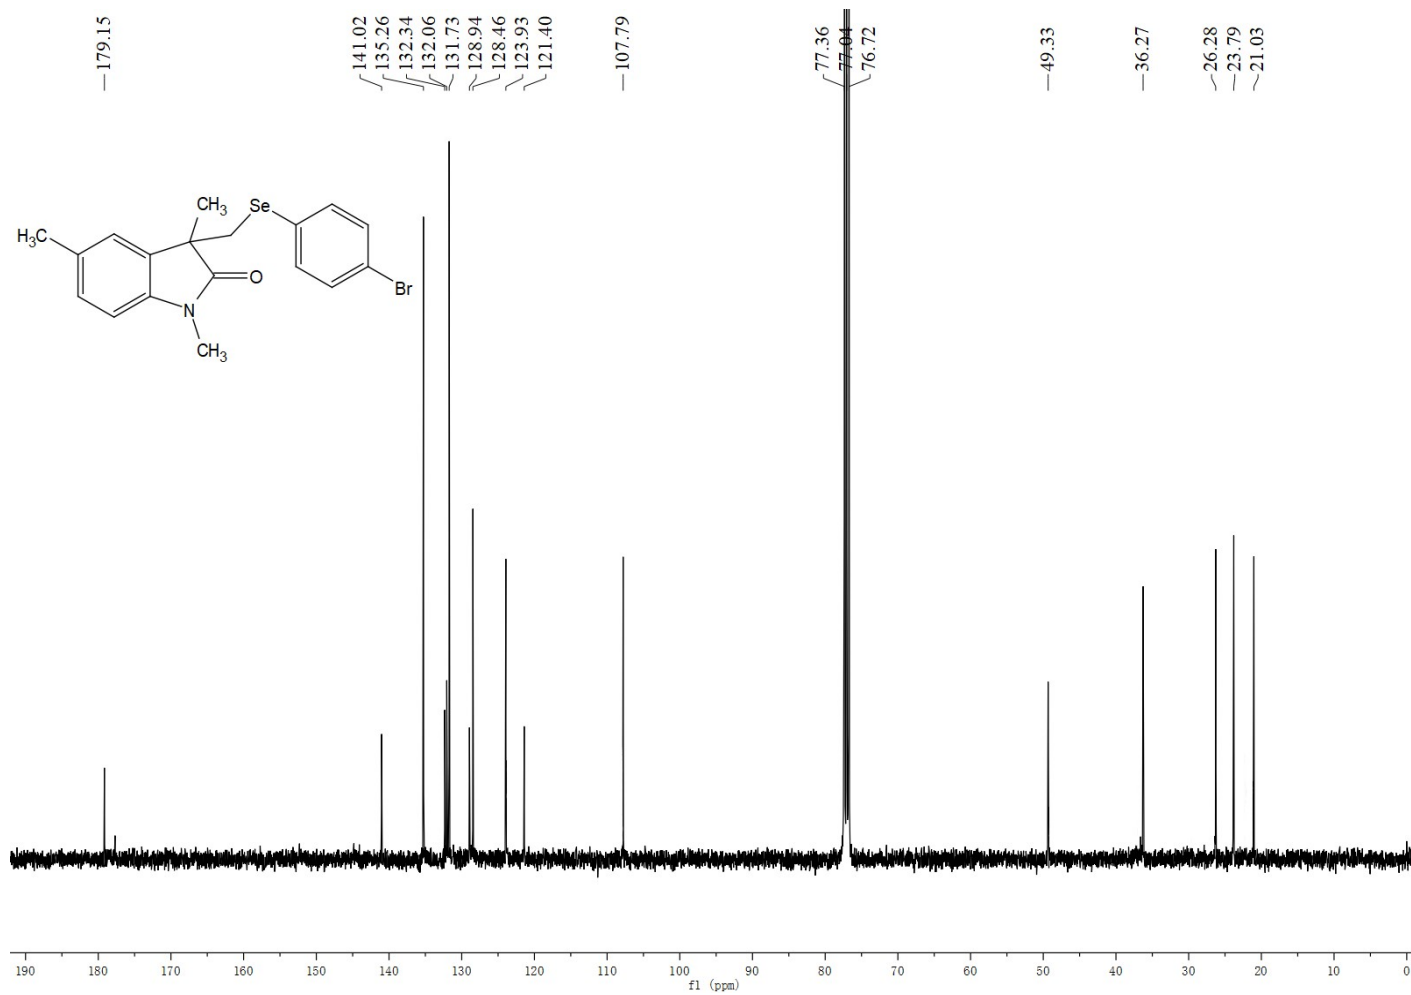

HRMS (ESI)

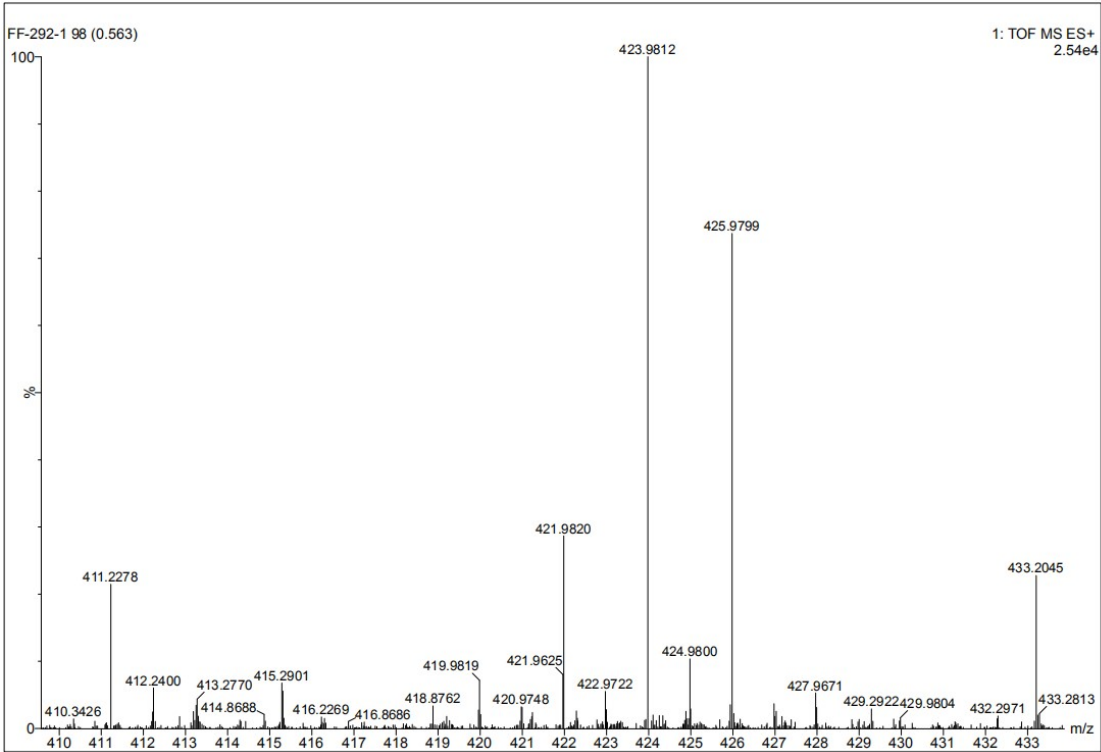

### 3-(((4-Methoxyphenyl)selanyl)methyl)-1,3,5-trimethylindolin-2-one (3af)

<sup>1</sup>H NMR (400 MHz, CDCl<sub>3</sub>)

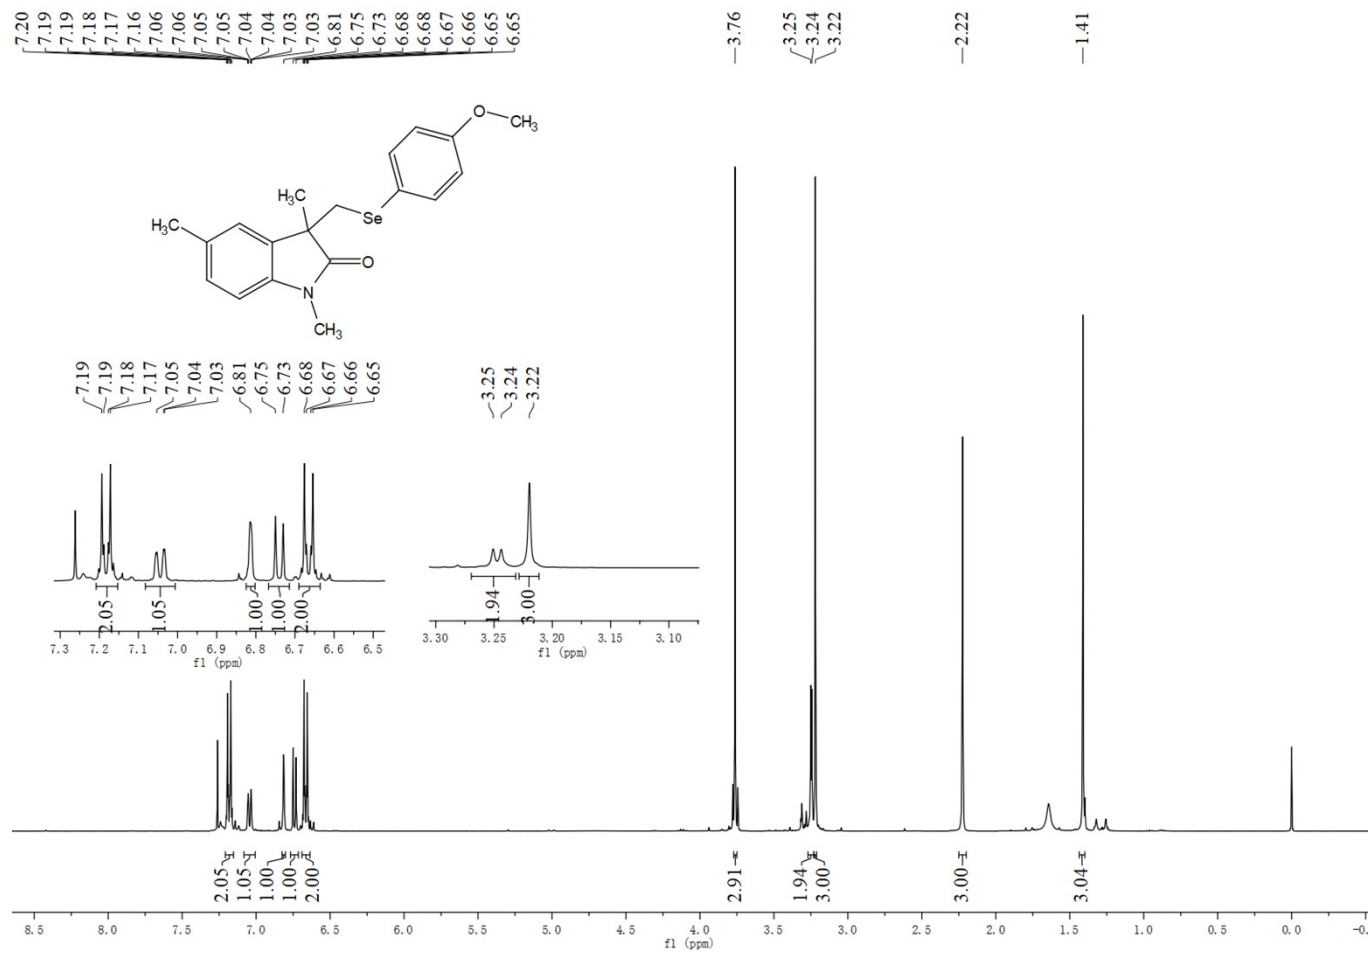

<sup>13</sup>C NMR (100 MHz, CDCl<sub>3</sub>)

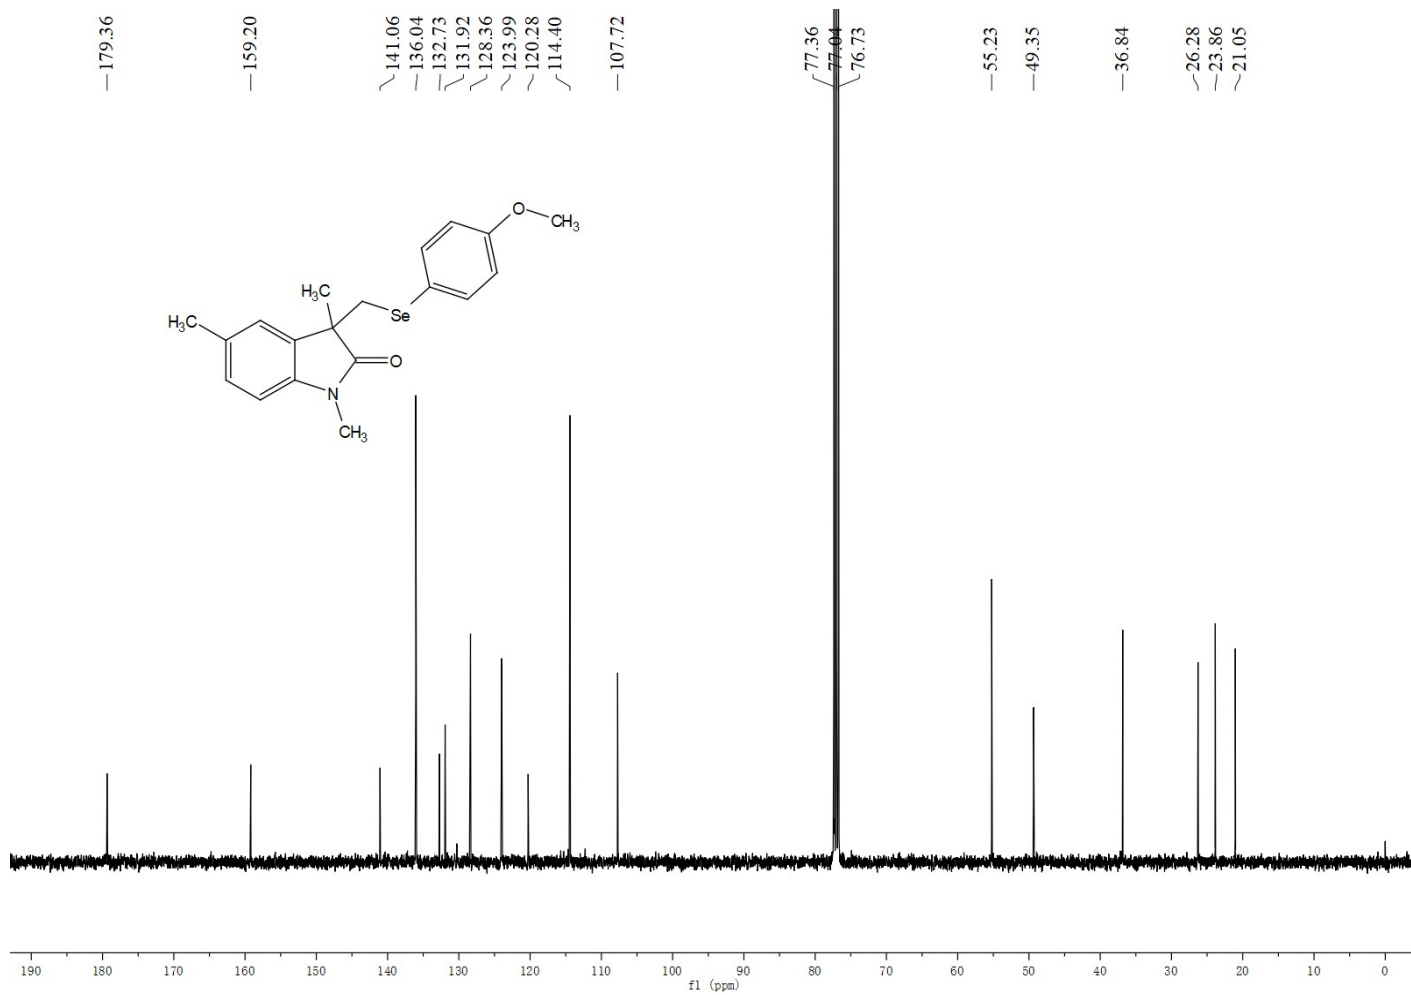

HRMS (ESI)

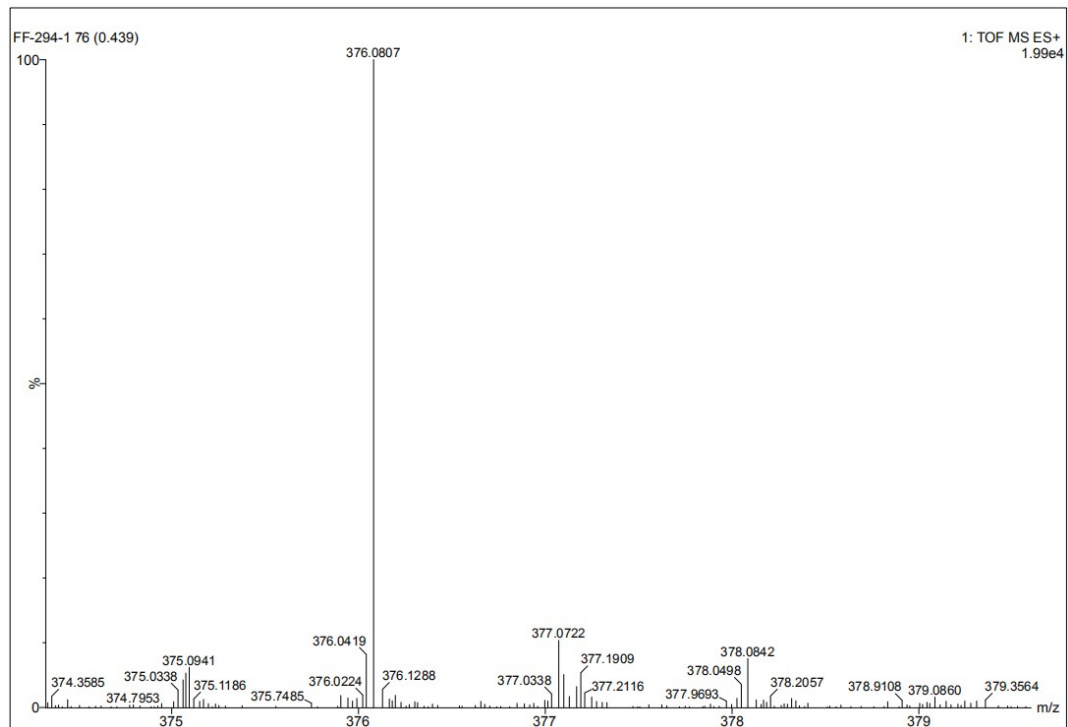



**1,3,5-Trimethyl-3-(((4-(trifluoromethyl)phenyl)selenanyl)methyl)indolin-2-one (3ag)**

<sup>1</sup>H NMR (400 MHz, CDCl<sub>3</sub>)

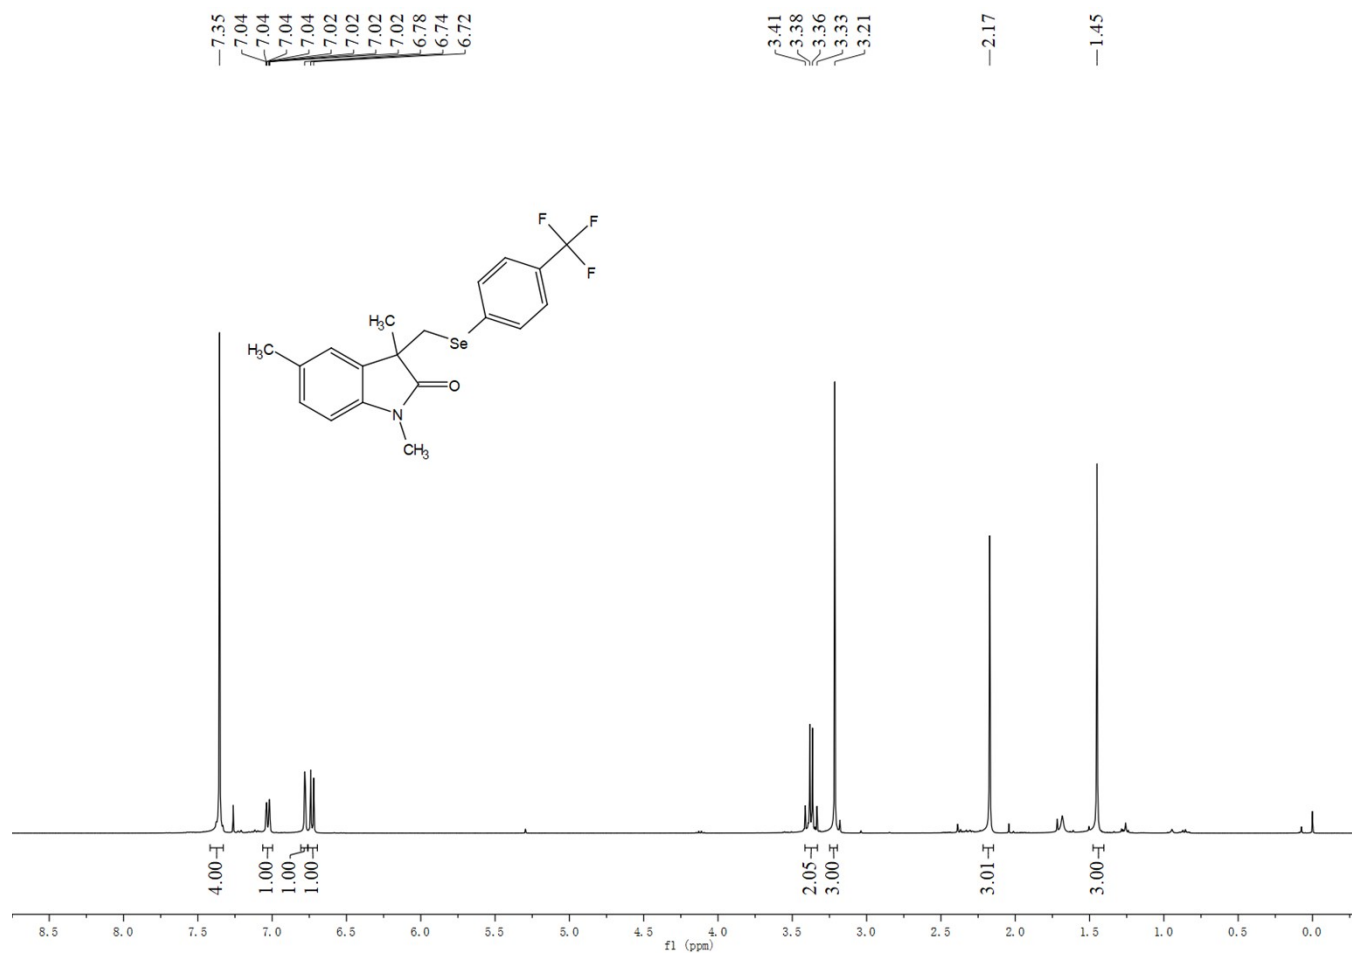

$^{13}\text{C}$  NMR (100 MHz,  $\text{CDCl}_3$ )

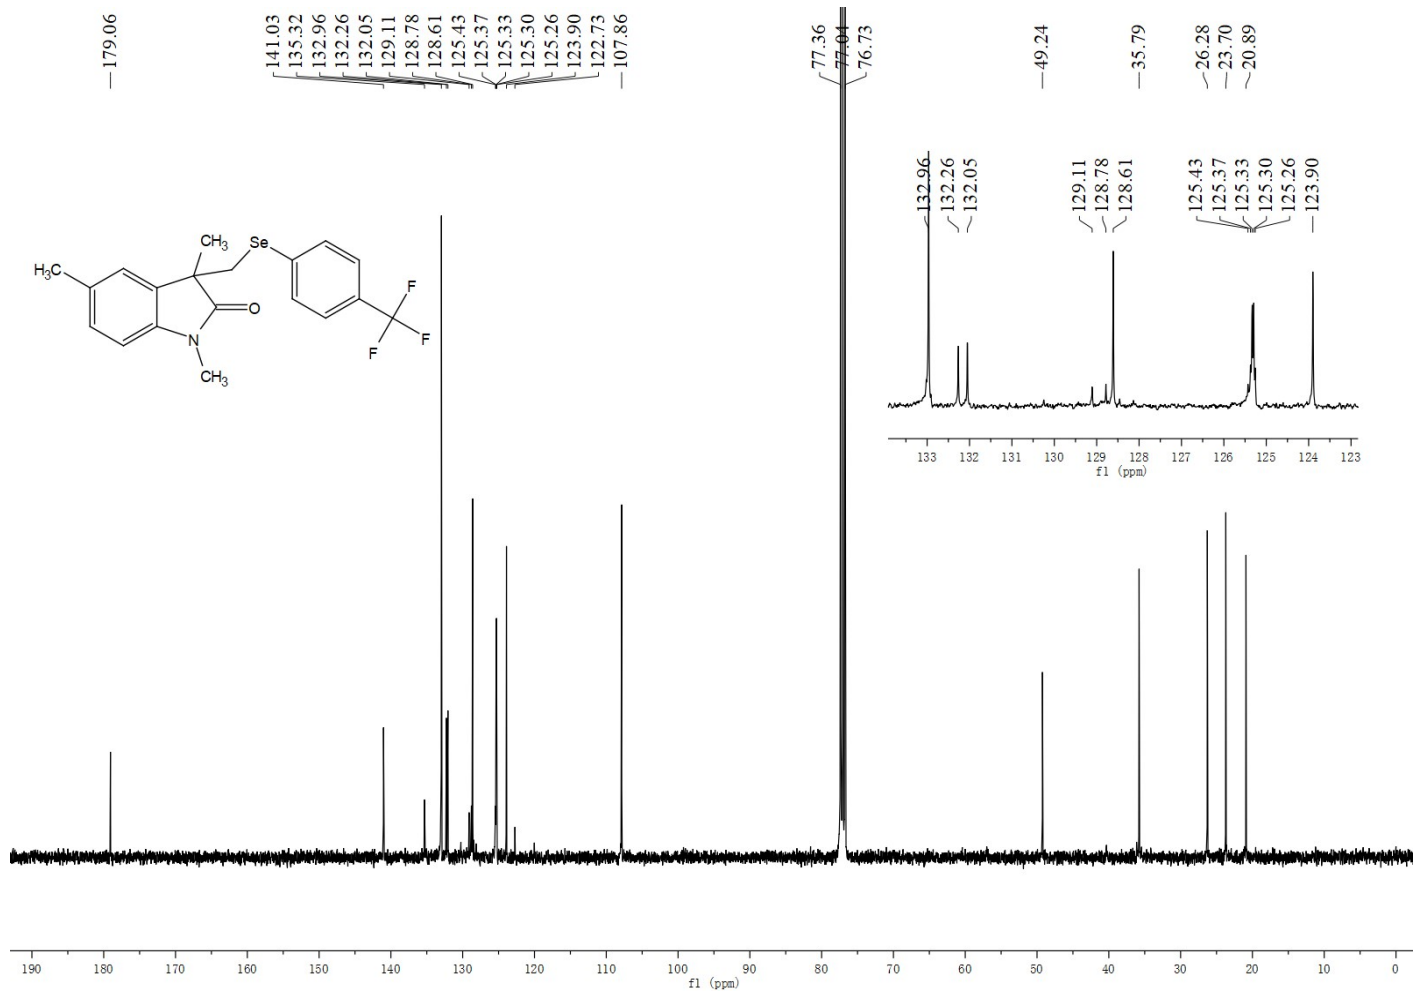

$^{19}\text{F}$  NMR (377 MHz,  $\text{CDCl}_3$ )

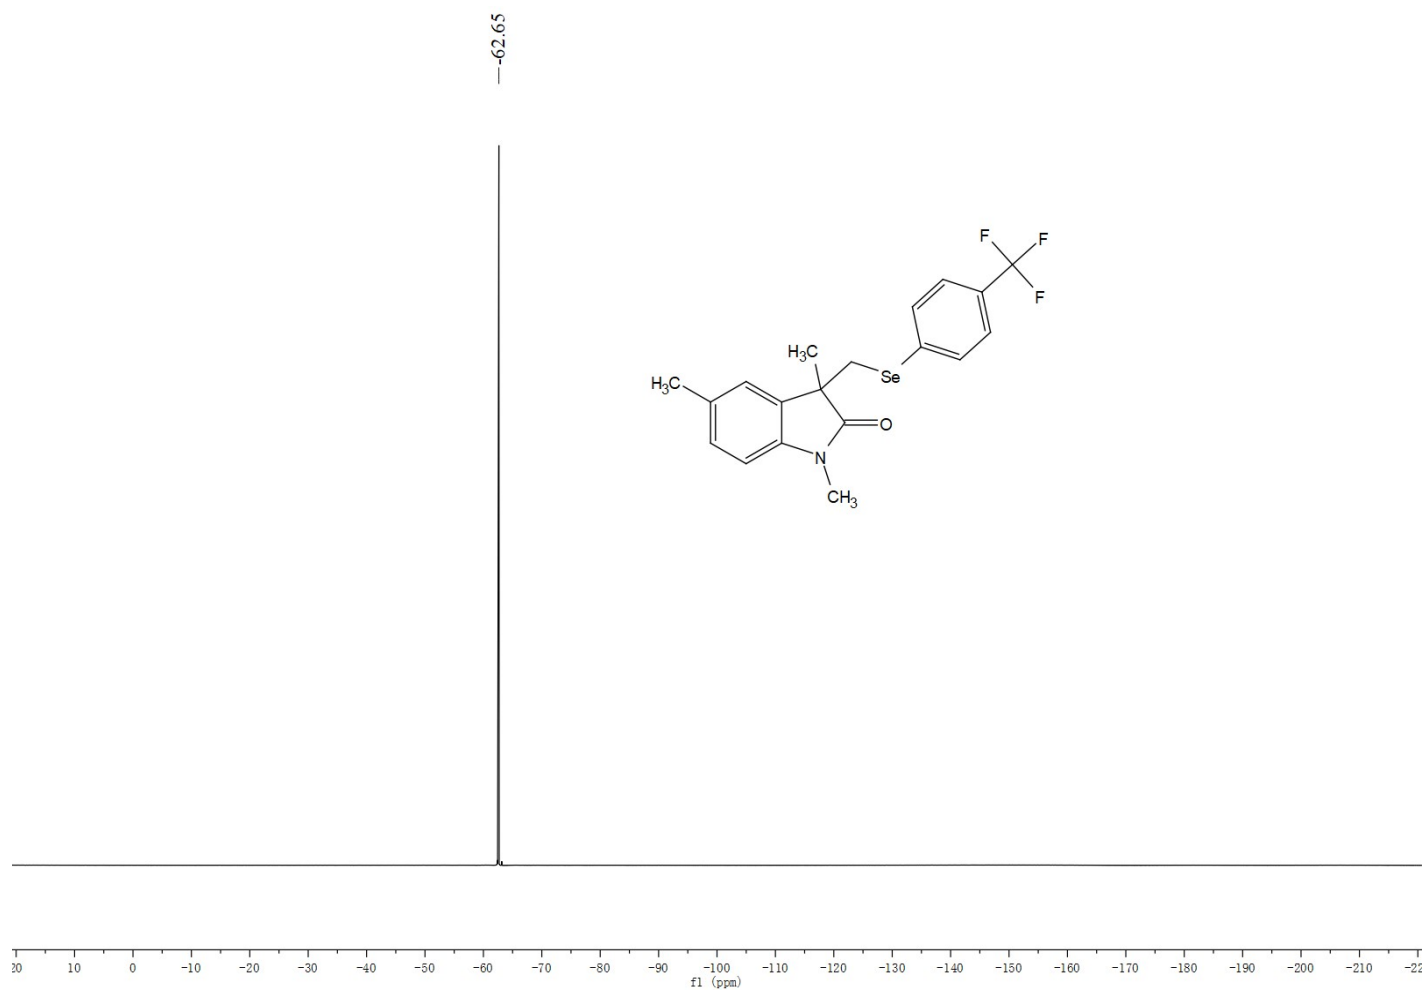

HRMS (ESI)

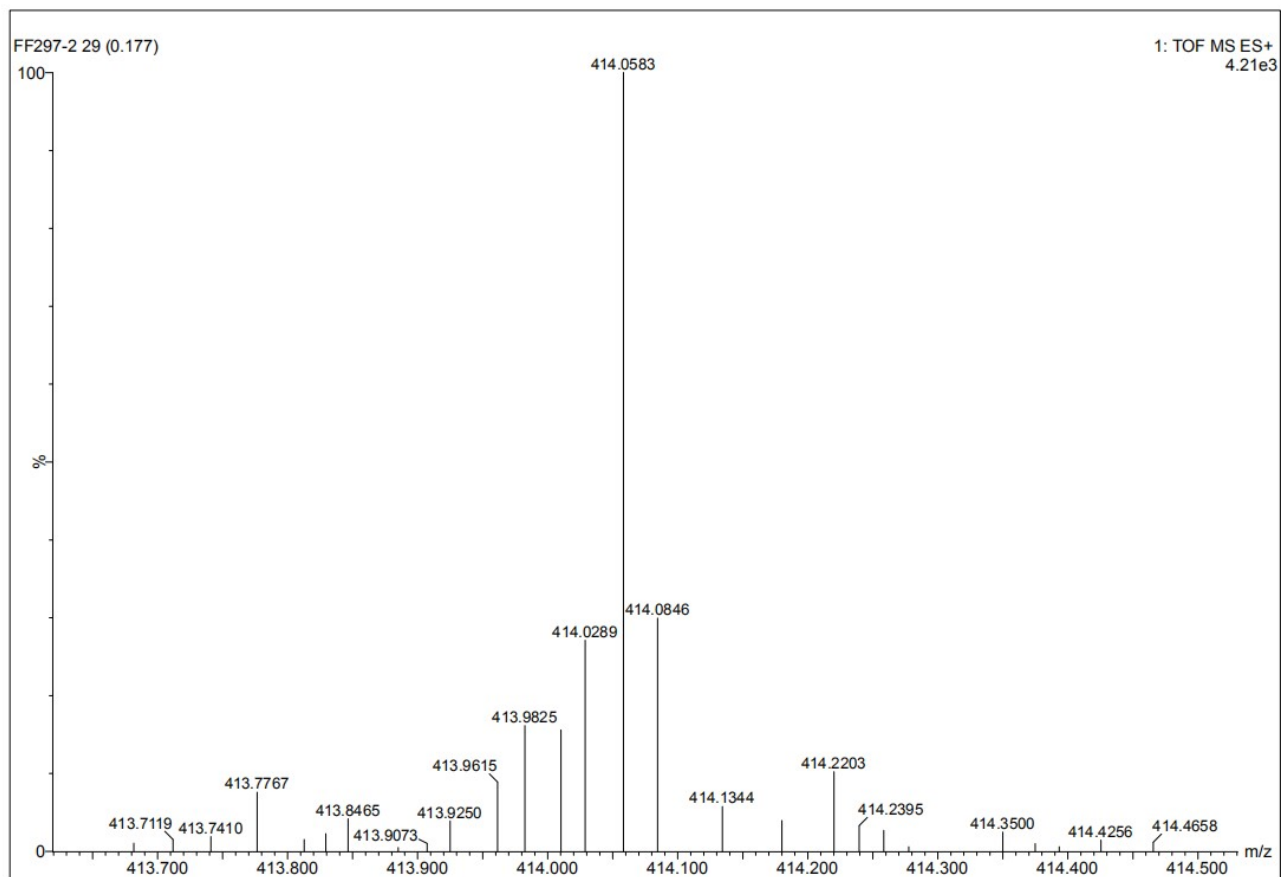

### 3-Methyl-3-((phenylthio)methyl)benzofuran-2(3H)-one (3ah)

$^1\text{H}$  NMR (400 MHz,  $\text{CDCl}_3$ )

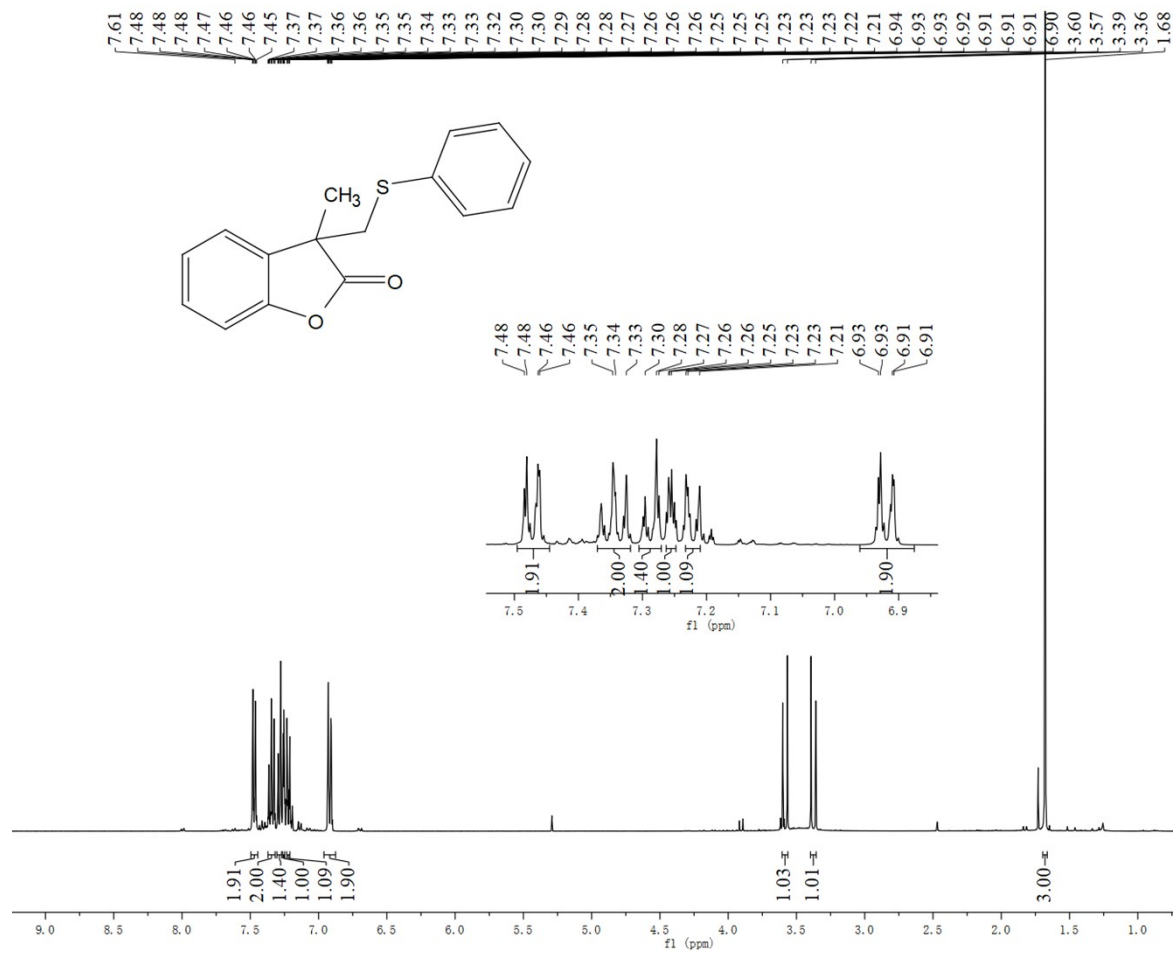

$^{13}\text{C}$  NMR (100 MHz,  $\text{CDCl}_3$ )

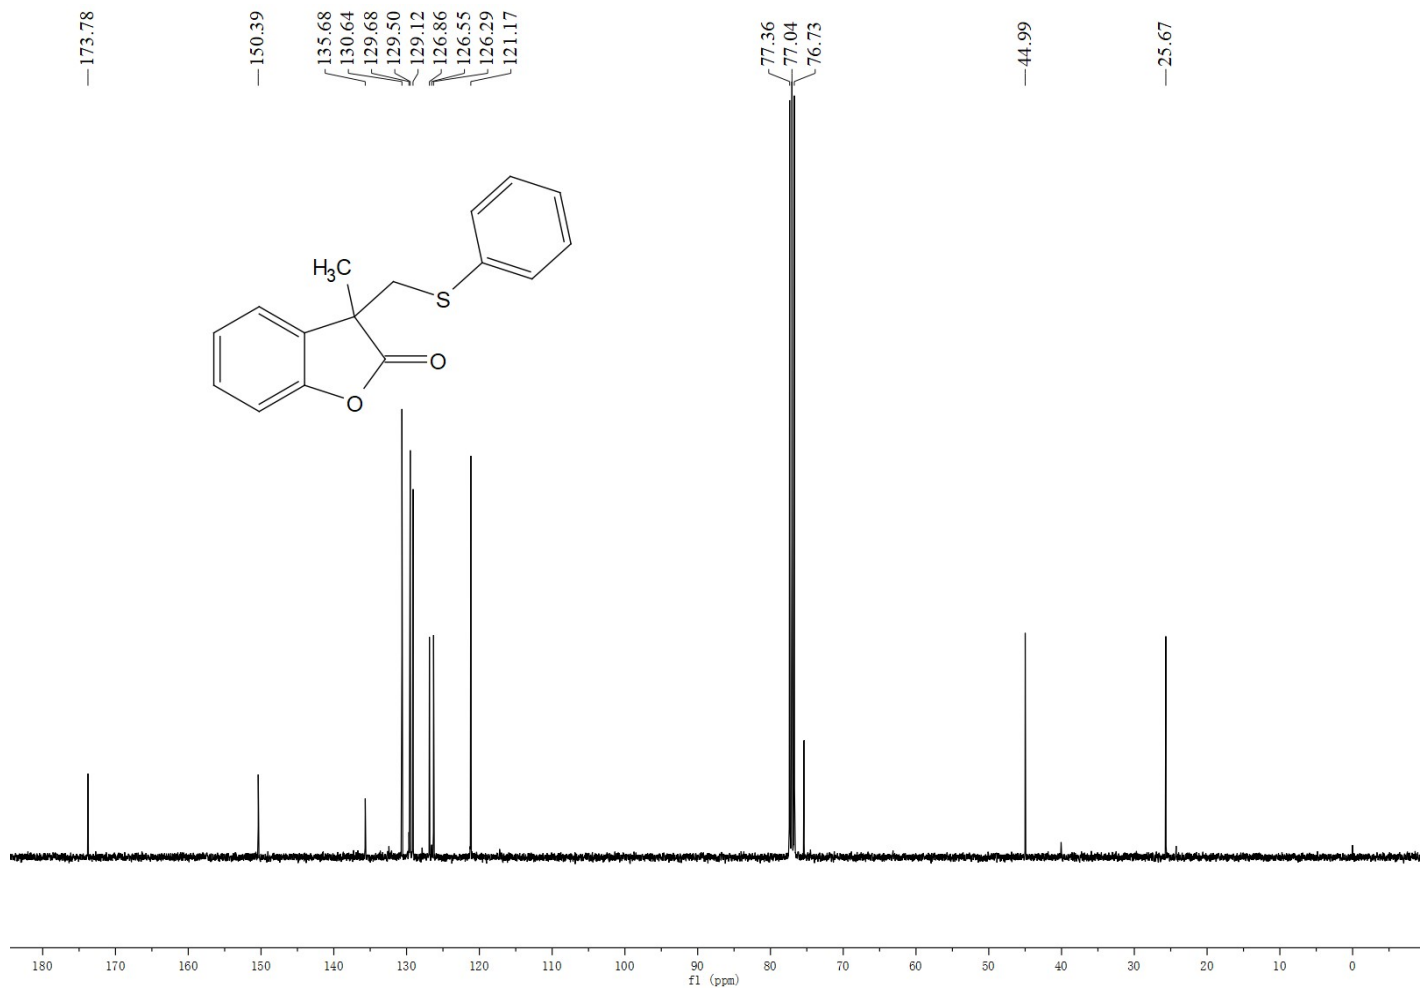

HRMS (ESI)

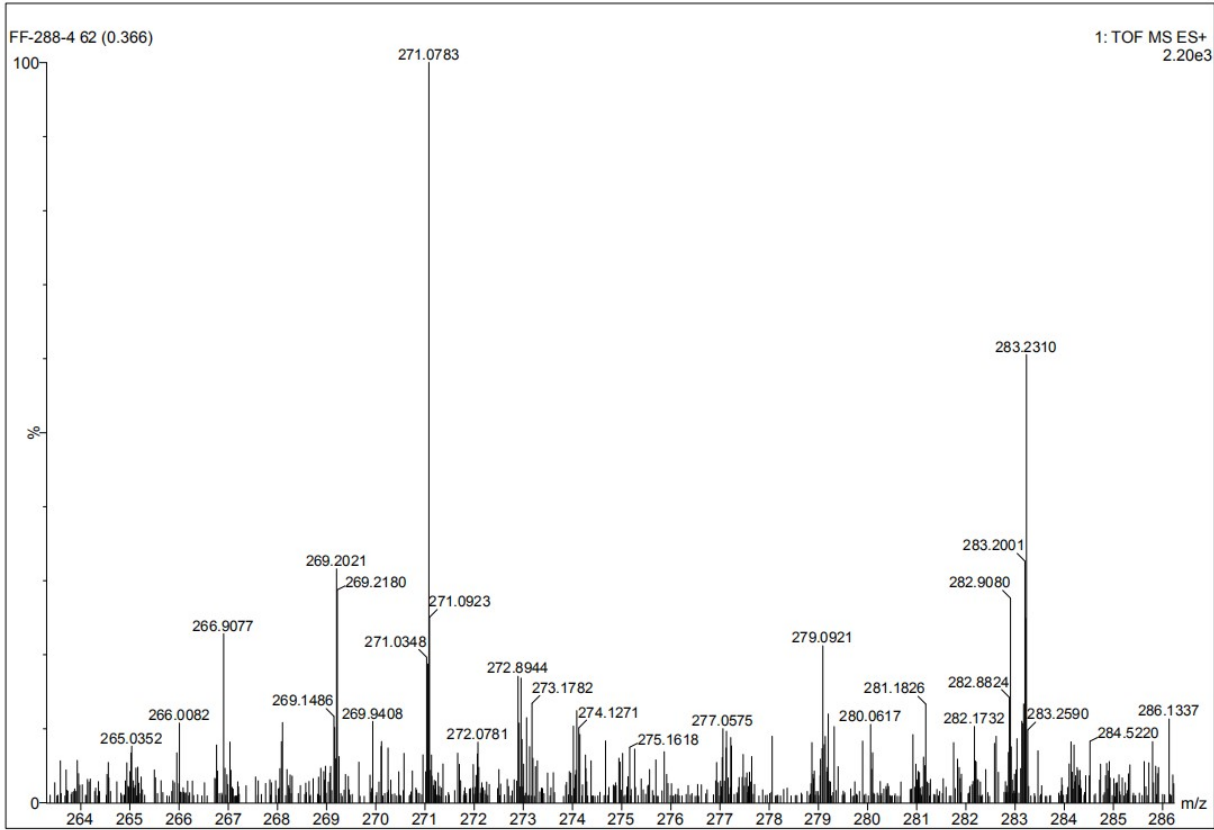

# 5-Methoxy-3-methyl-3-((phenylsulfonyl)methyl)benzofuran-2(3H)-one (3ai)

$^1\text{H}$  NMR (400 MHz,  $\text{CDCl}_3$ )

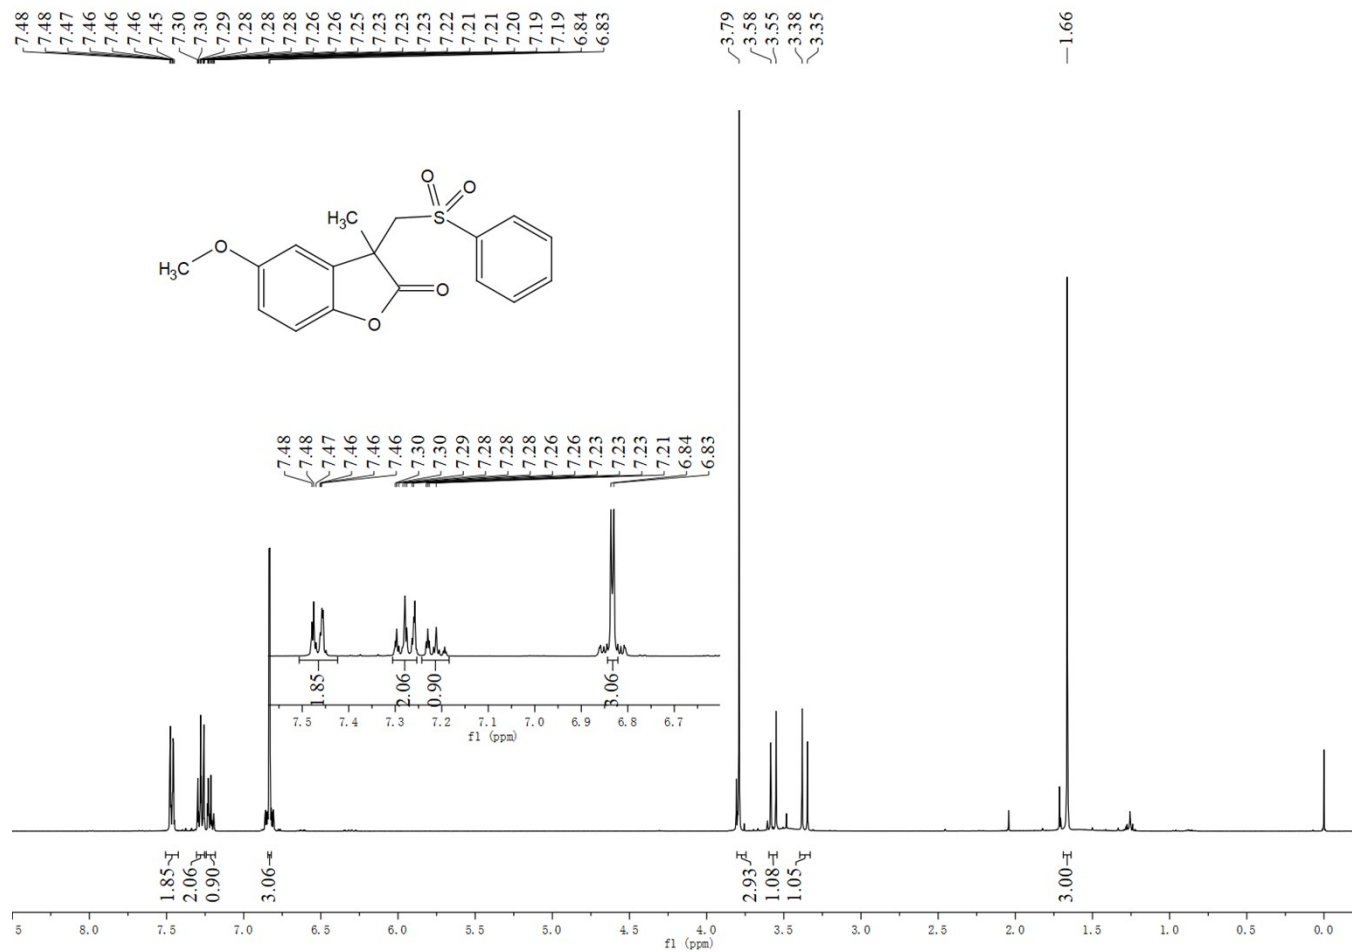



<sup>13</sup>C NMR (100 MHz, CDCl<sub>3</sub>)

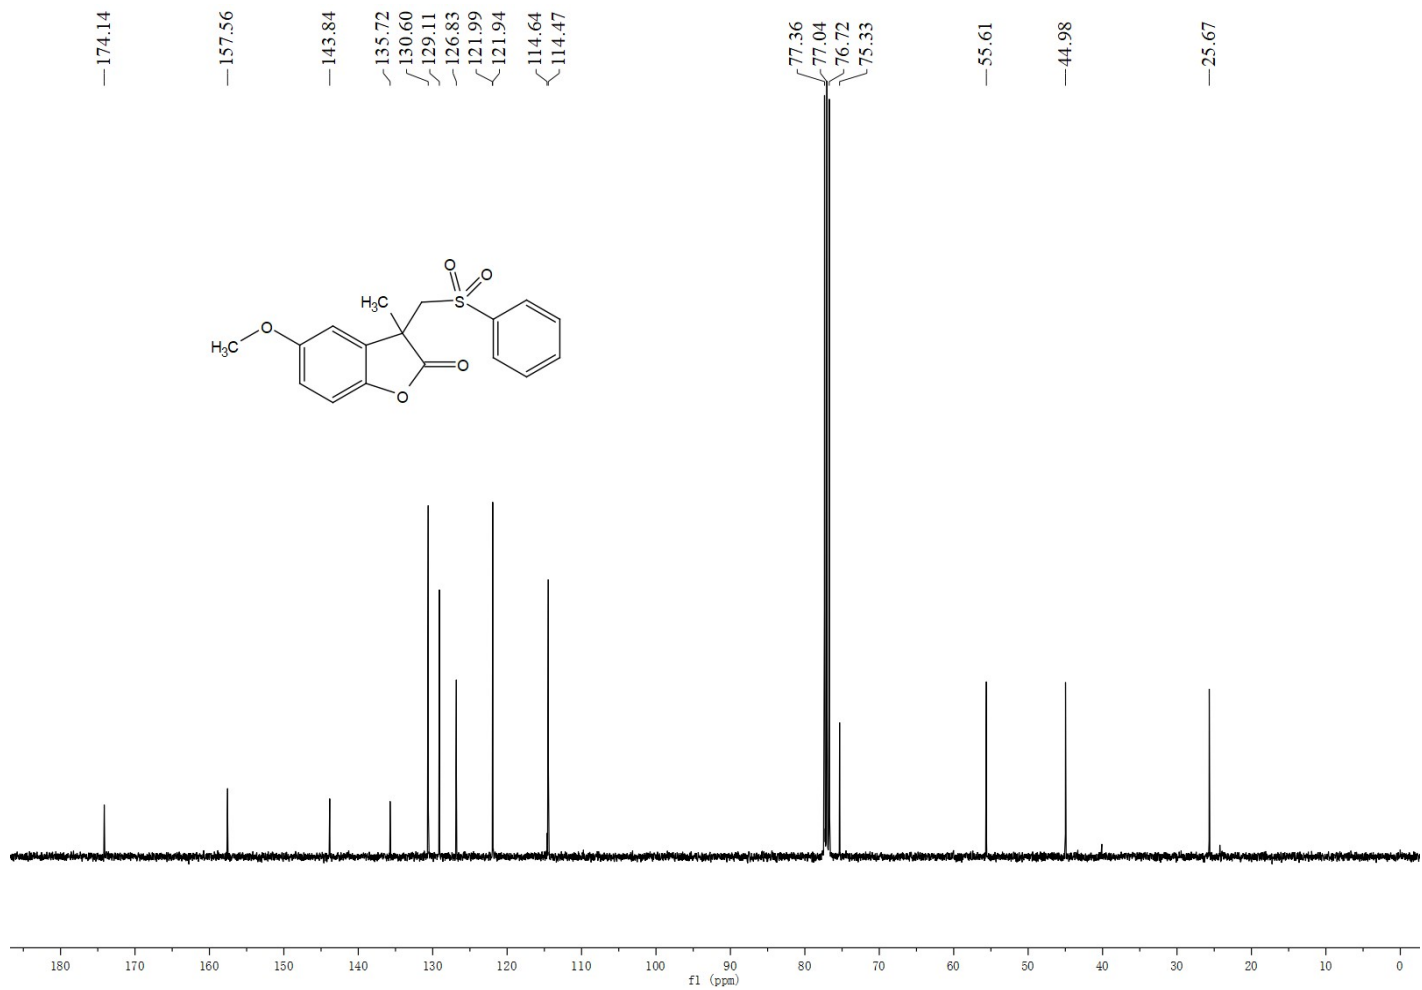

HRMS (ESI)

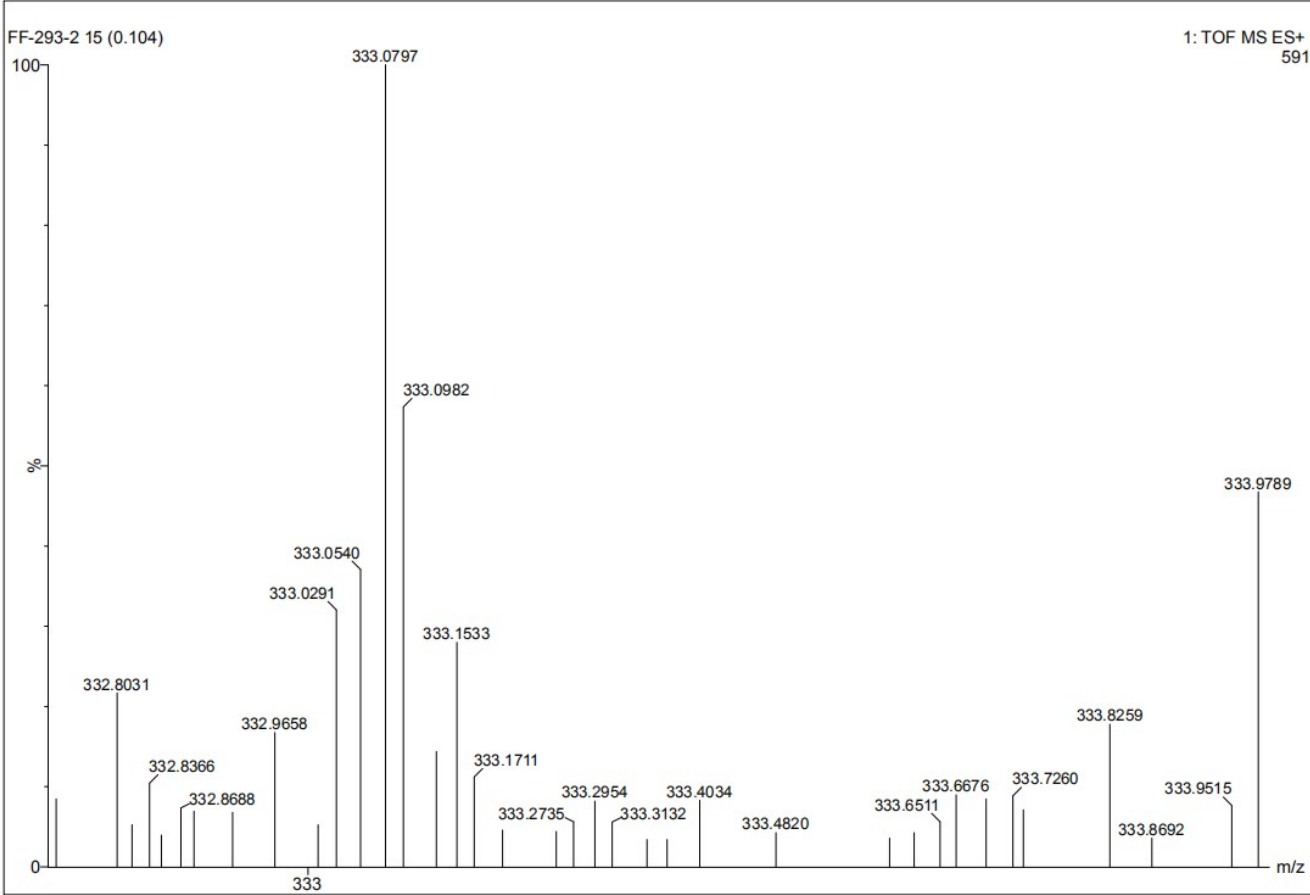

5-Chloro-3-methyl-3-((phenylsulfonyl)methyl)benzofuran-2(3H)-one (3aj)

<sup>1</sup>H NMR (400 MHz, CDCl<sub>3</sub>)

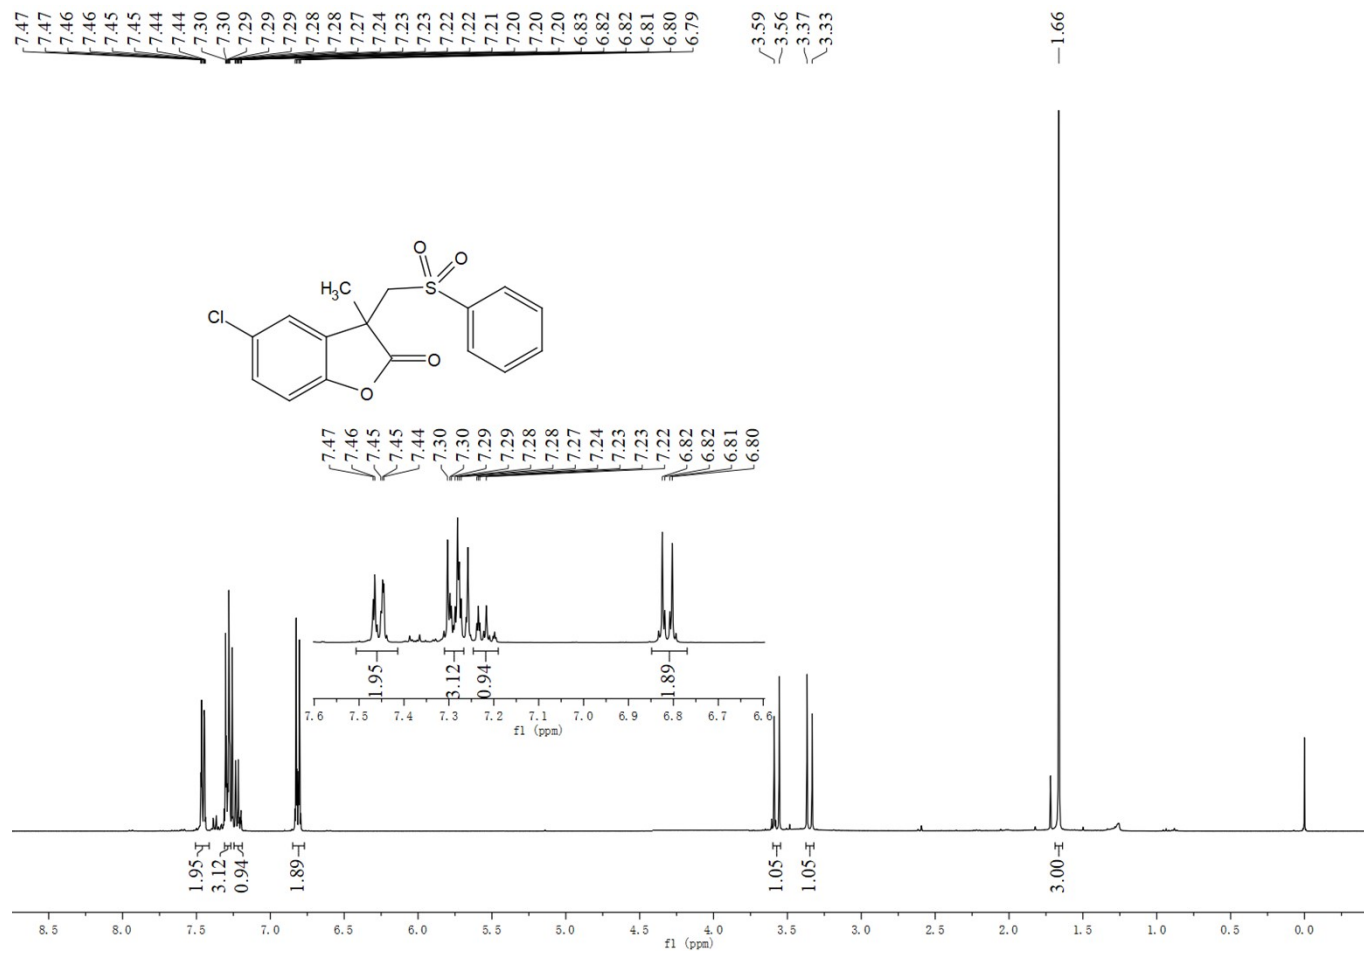

<sup>13</sup>C NMR (100 MHz, CDCl<sub>3</sub>)

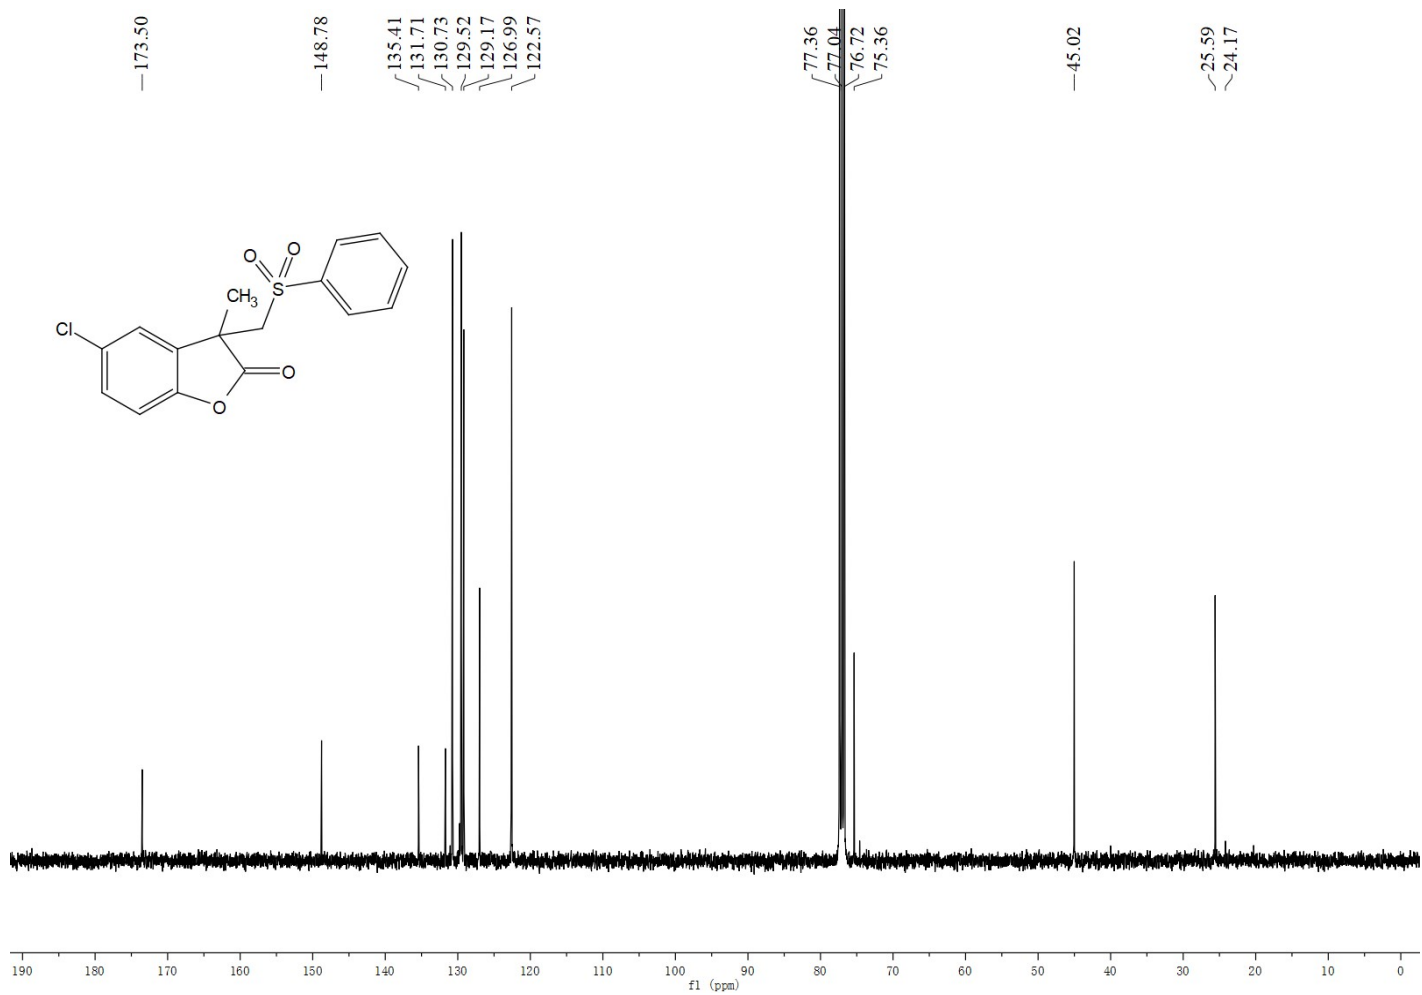

HRMS (ESI)

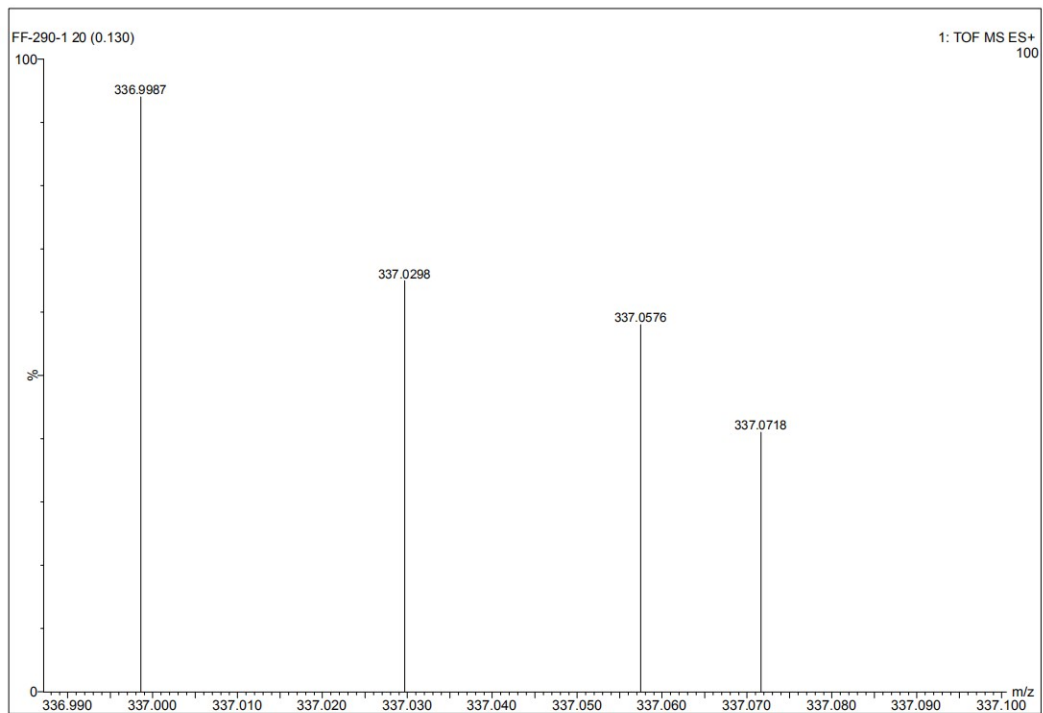

**5-Bromo-1,3-dimethyl-3-((phenylthio)methyl)indolin-2-one (4a)**

<sup>1</sup>H NMR (400 MHz, CDCl<sub>3</sub>)

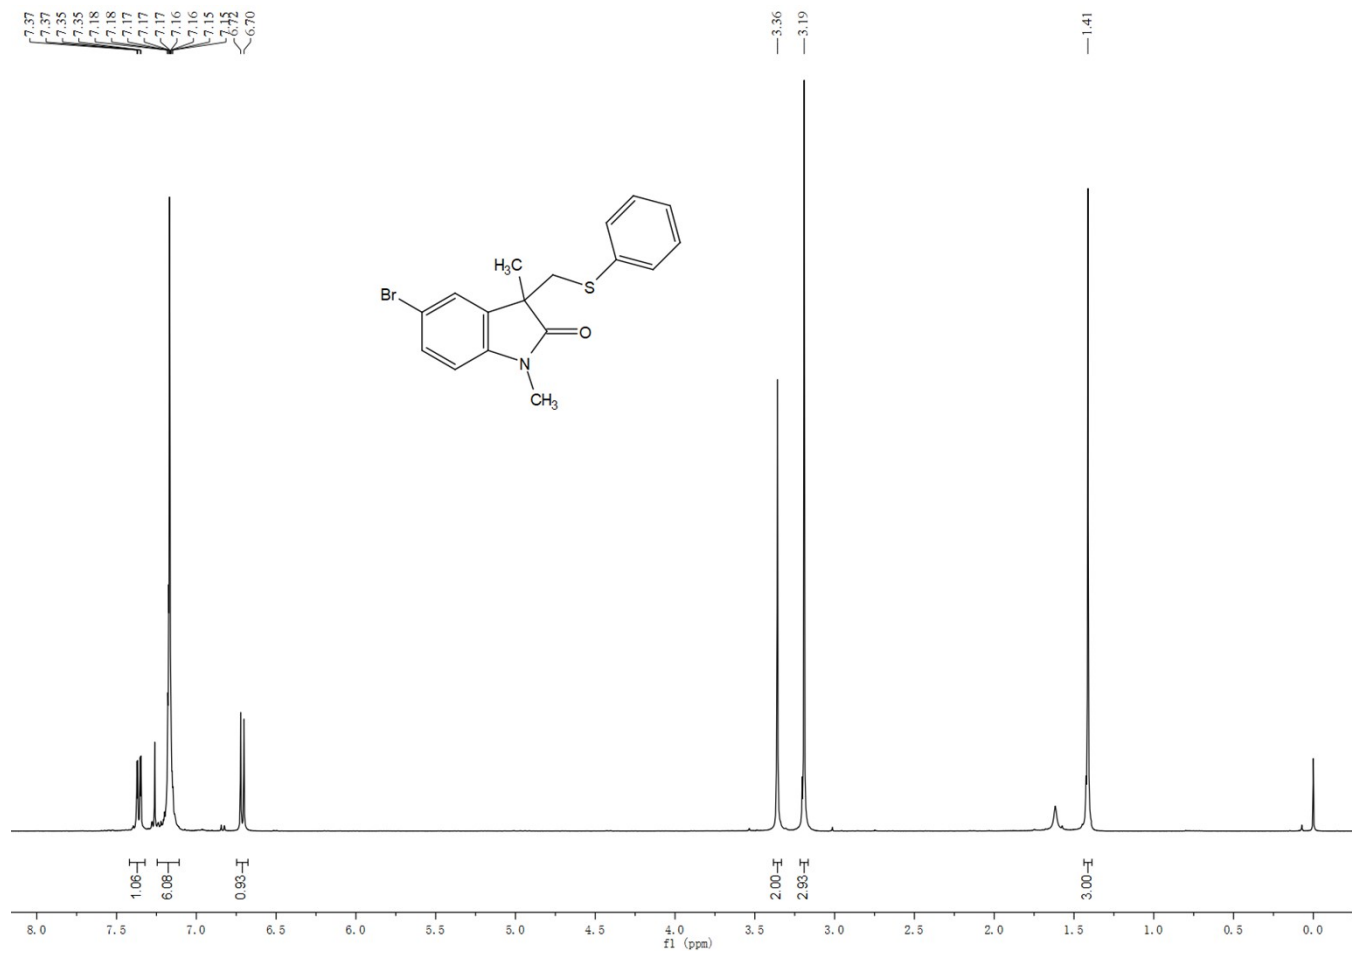

<sup>13</sup>C NMR (100 MHz, CDCl<sub>3</sub>)

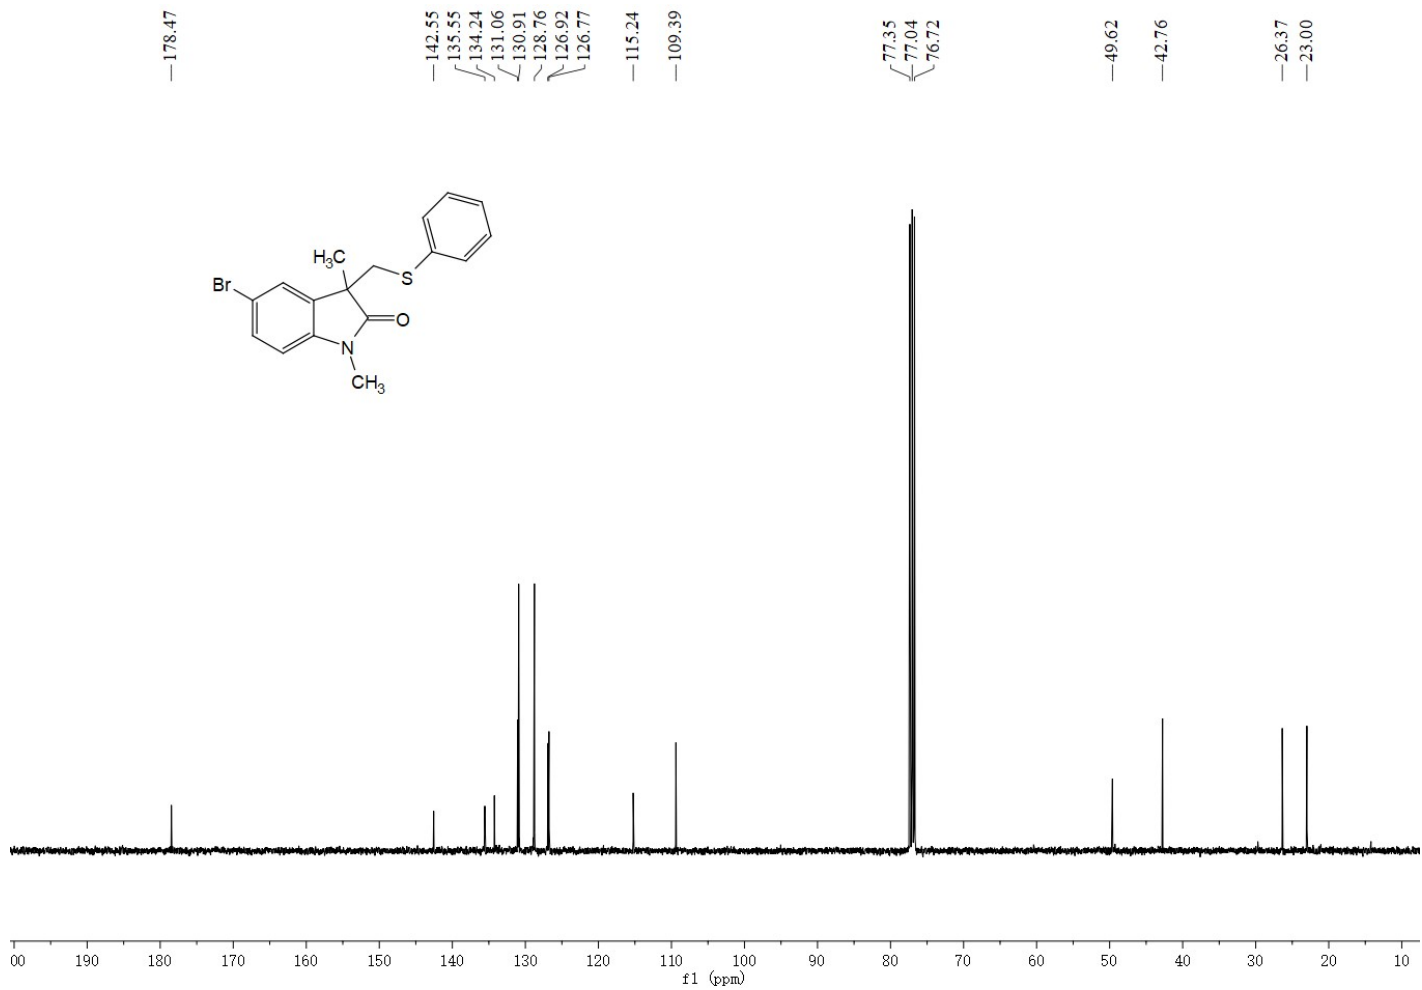

HRMS (ESI)

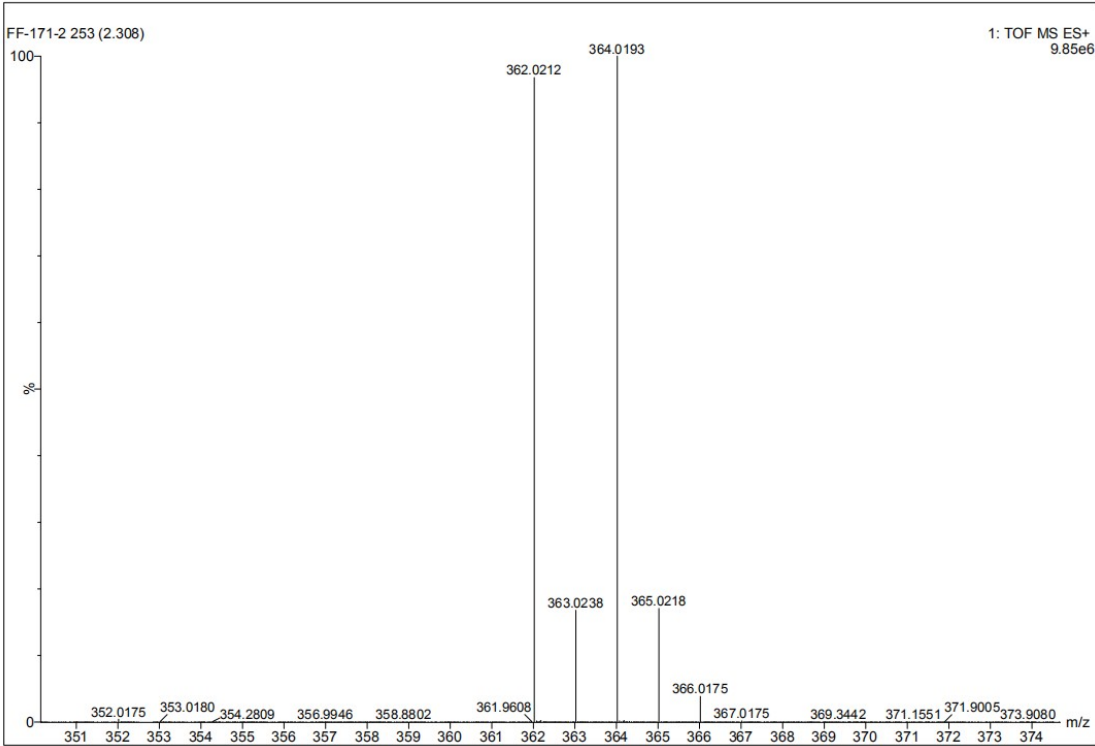



# 5-Bromo-1,3-dimethyl-3-((*p*-tolylthio)methyl)indolin-2-one (4b)

<sup>1</sup>H NMR (400 MHz, CDCl<sub>3</sub>)

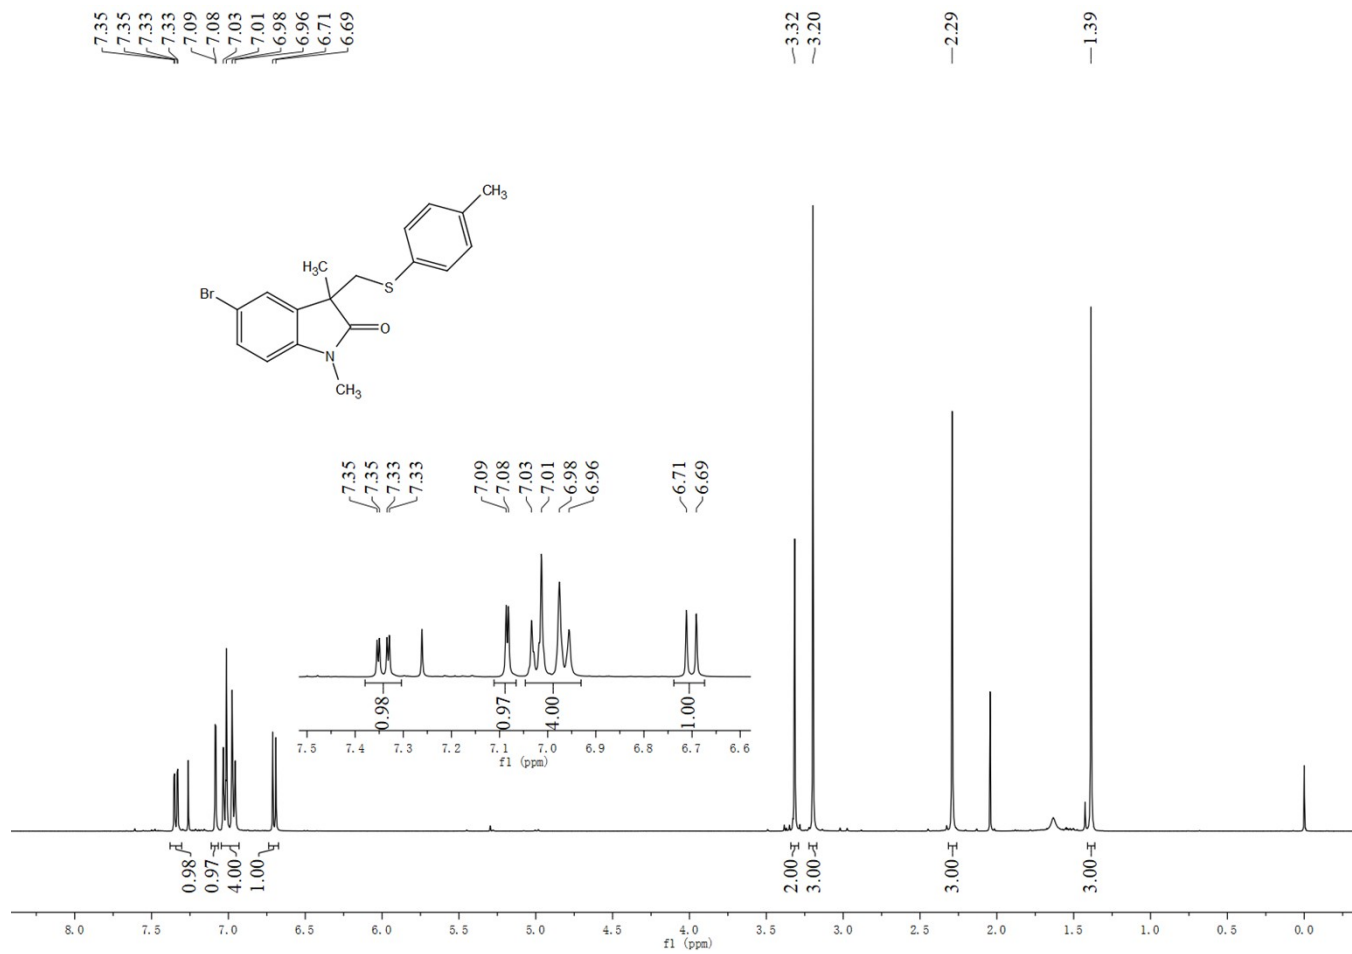

<sup>13</sup>C NMR (100 MHz, CDCl<sub>3</sub>)

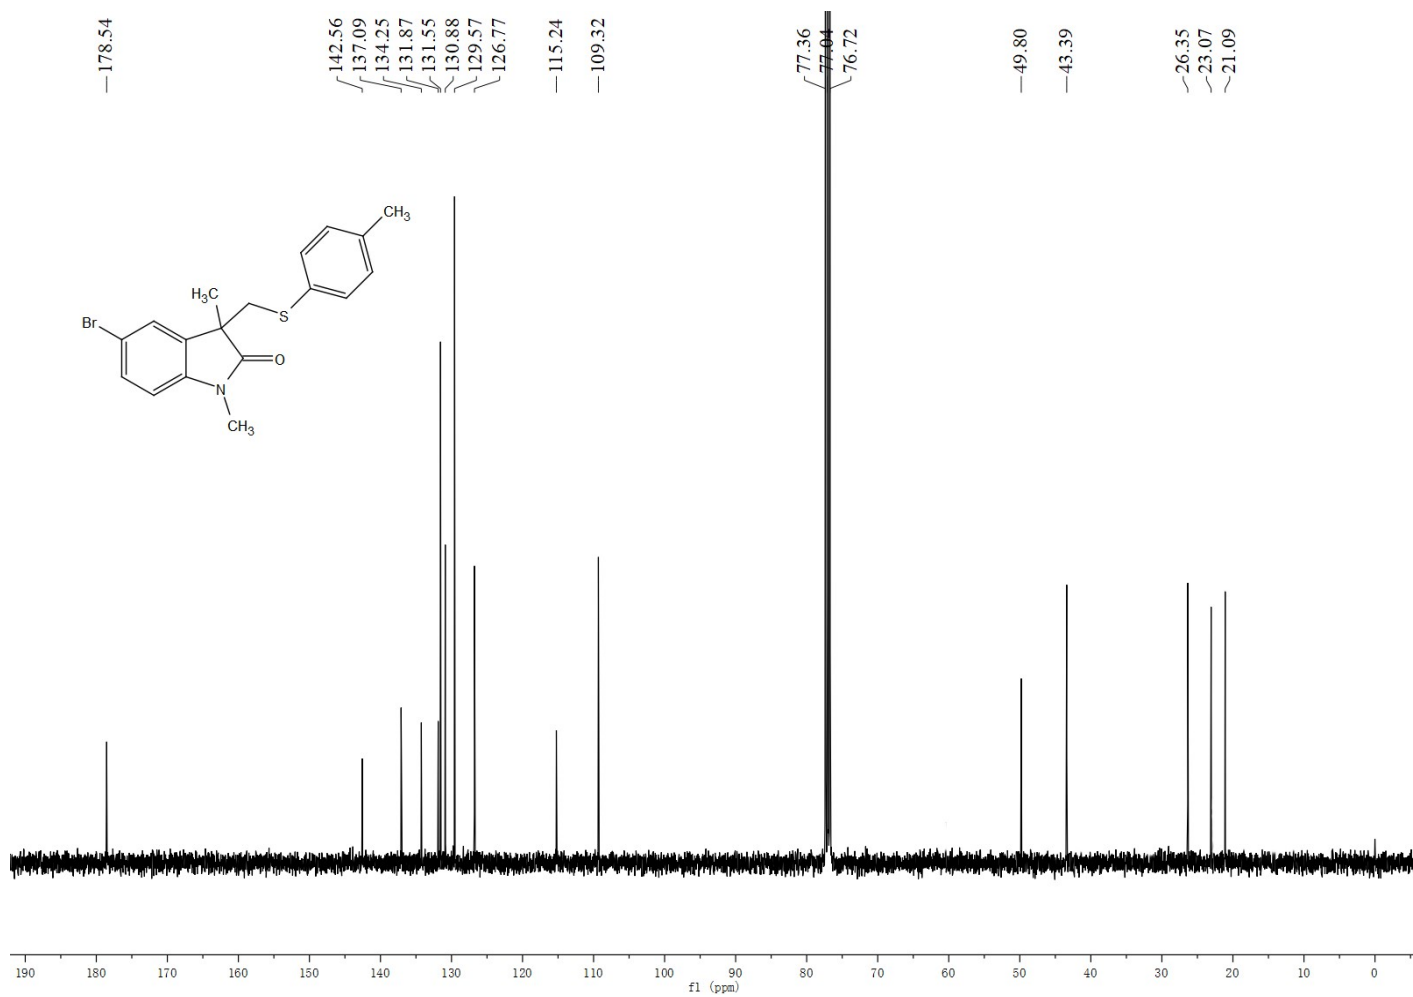

HRMS (ESI)

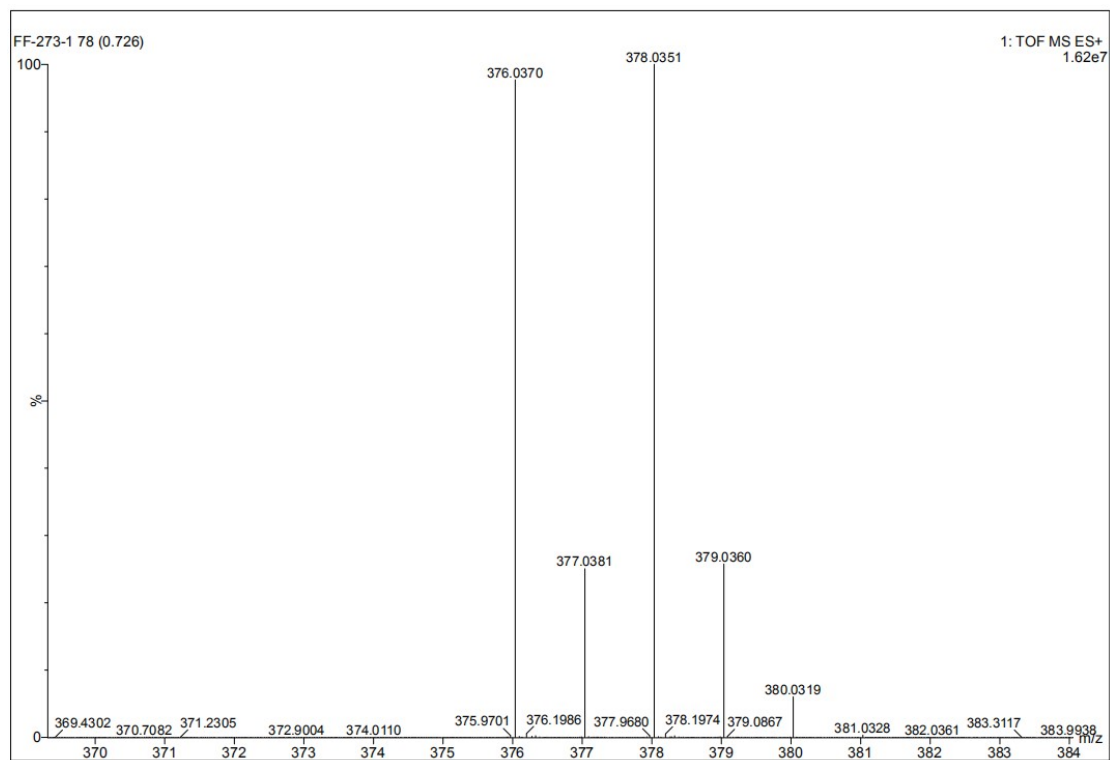

# 5-Bromo-3-(((4-methoxyphenyl)thio)methyl)-1,3-dimethylindolin-2-one (4c)

$^1\text{H}$  NMR (400 MHz,  $\text{CDCl}_3$ )

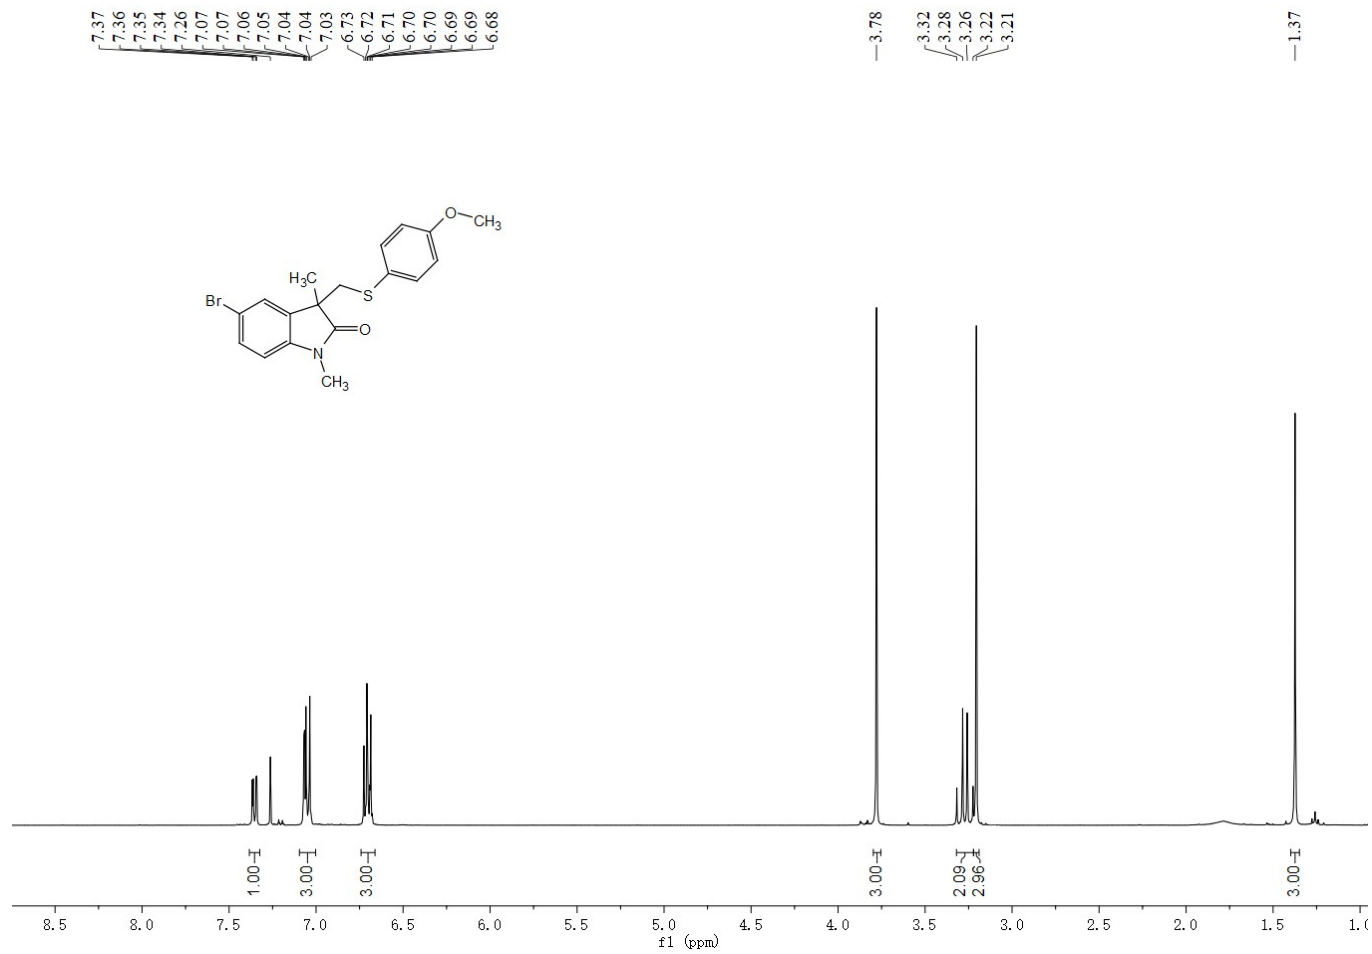

<sup>13</sup>C NMR (100 MHz, CDCl<sub>3</sub>)

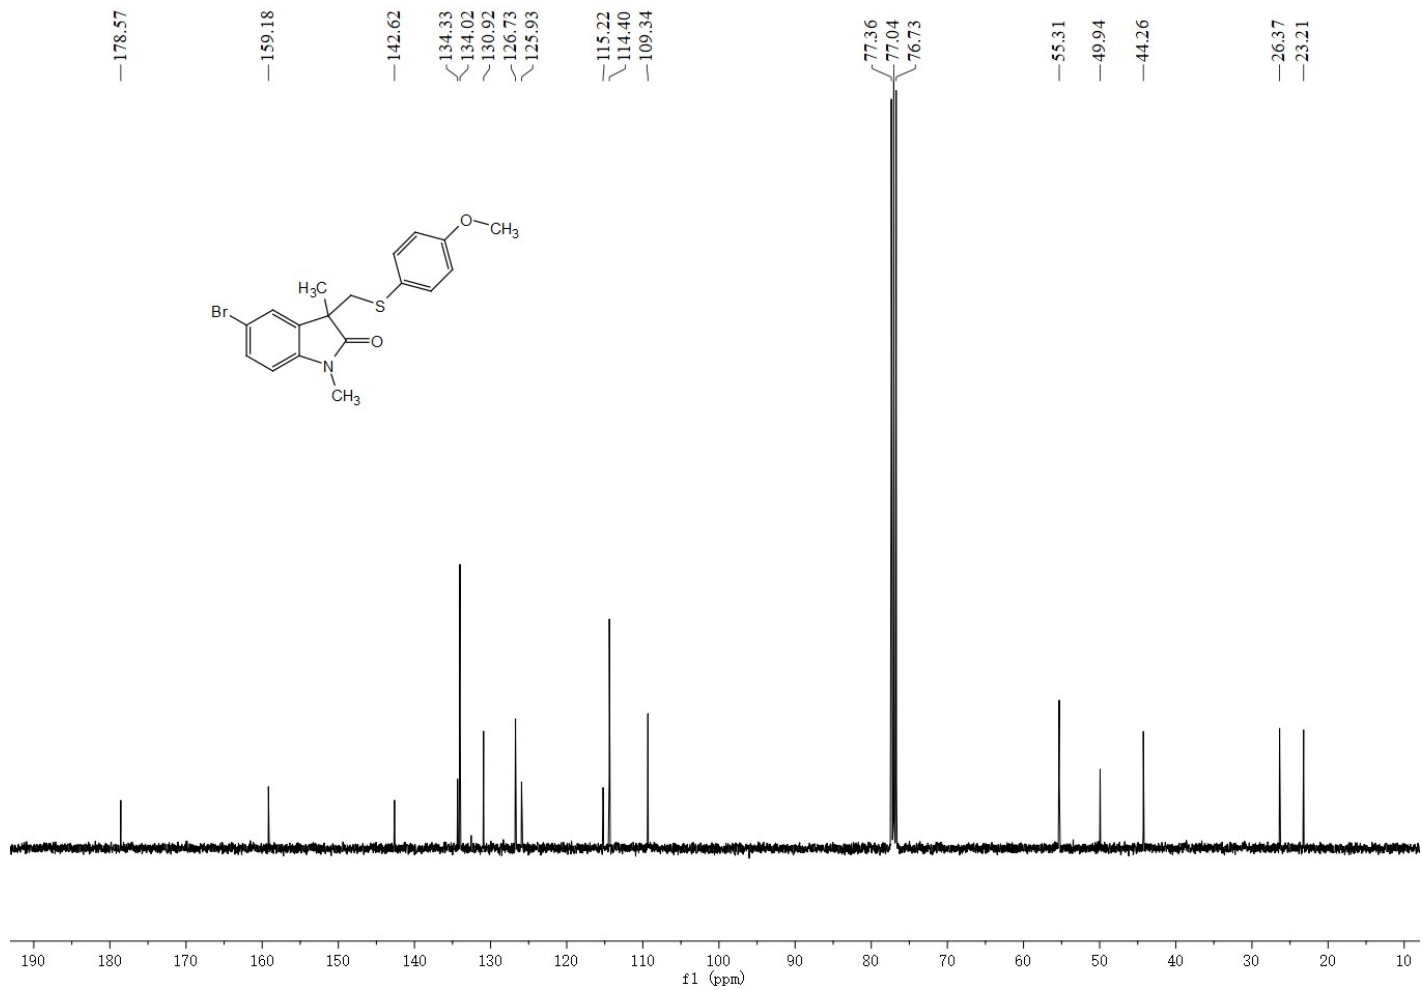

HRMS (ESI)

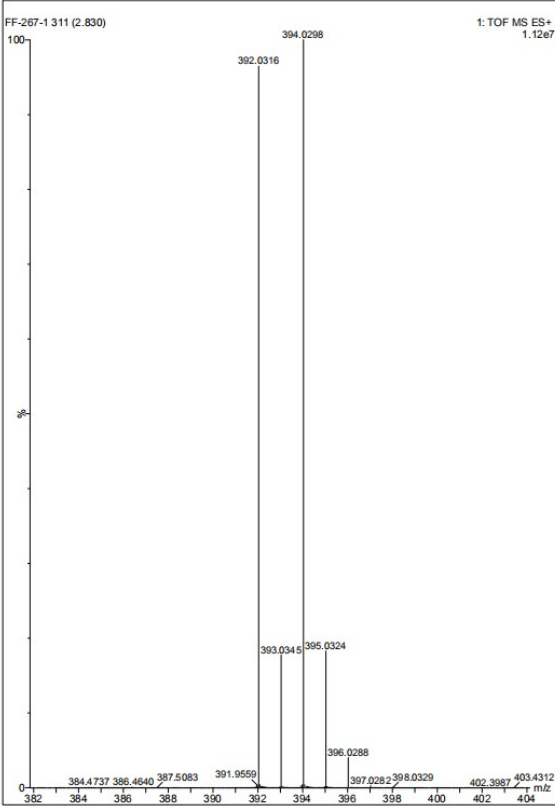

# 5-Bromo-3-(((4-chlorophenyl)thio)methyl)-1,3-dimethylindolin-2-one (4d)

$^1\text{H}$  NMR (600 MHz,  $\text{CDCl}_3$ )

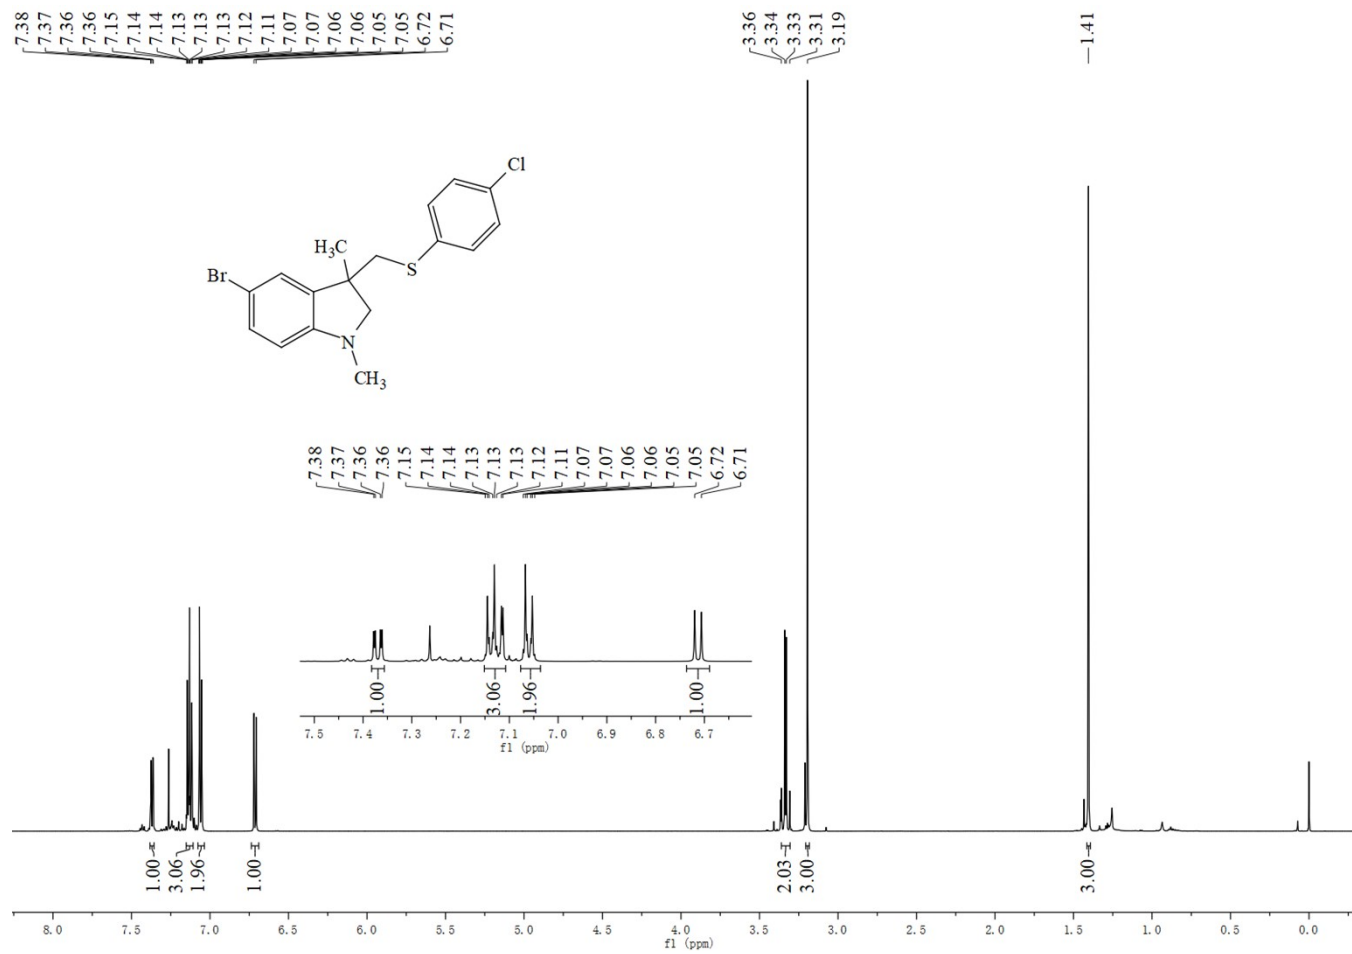

<sup>13</sup>C NMR (150 MHz, CDCl<sub>3</sub>)

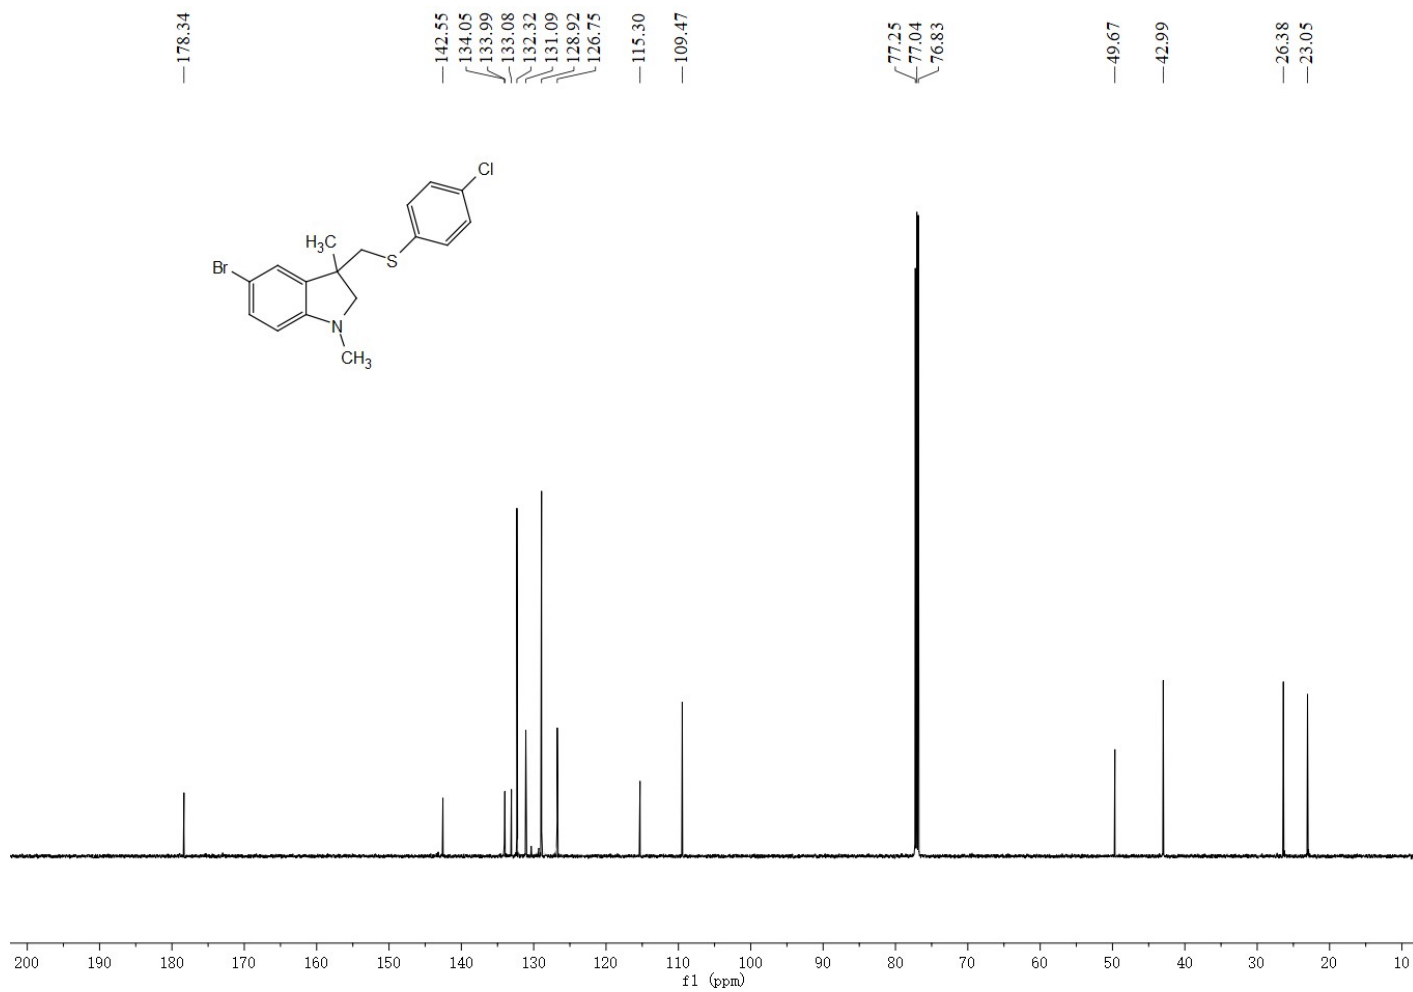



HRMS (ESI)

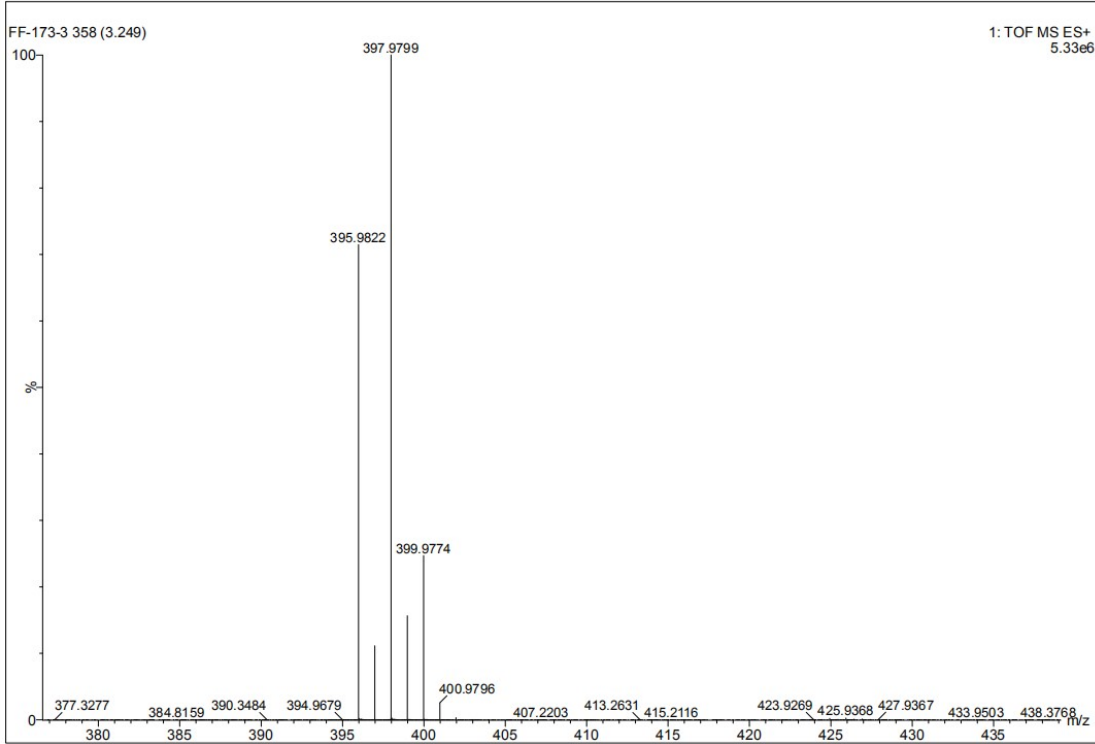

# 5-Bromo-3-((butylthio)methyl)-1,3-dimethylindolin-2-one (4e)

<sup>1</sup>H NMR (600 MHz, CDCl<sub>3</sub>)

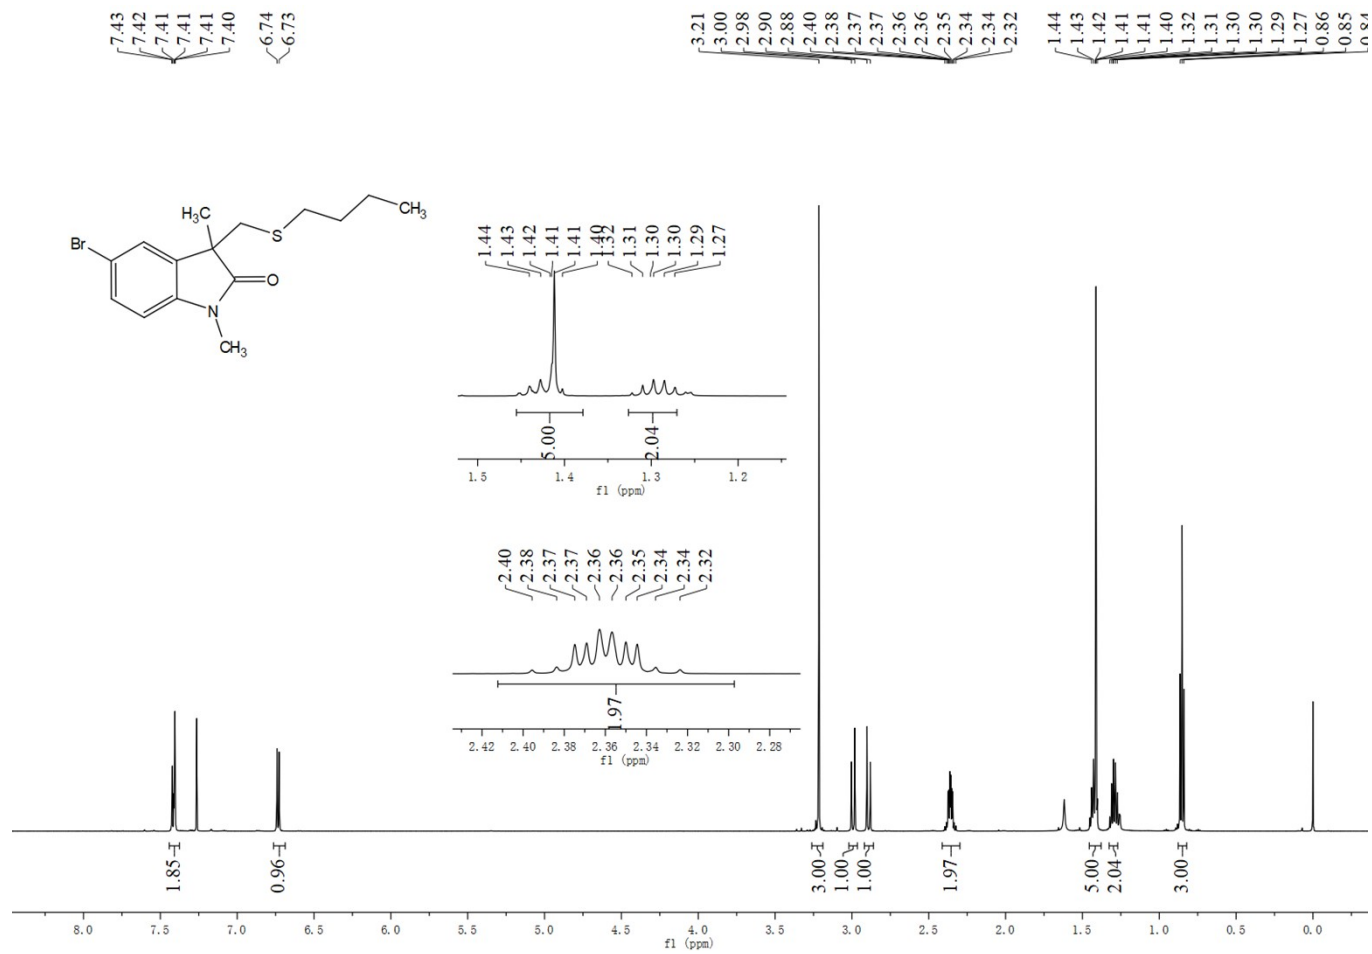

<sup>13</sup>C NMR (150 MHz, CDCl<sub>3</sub>)

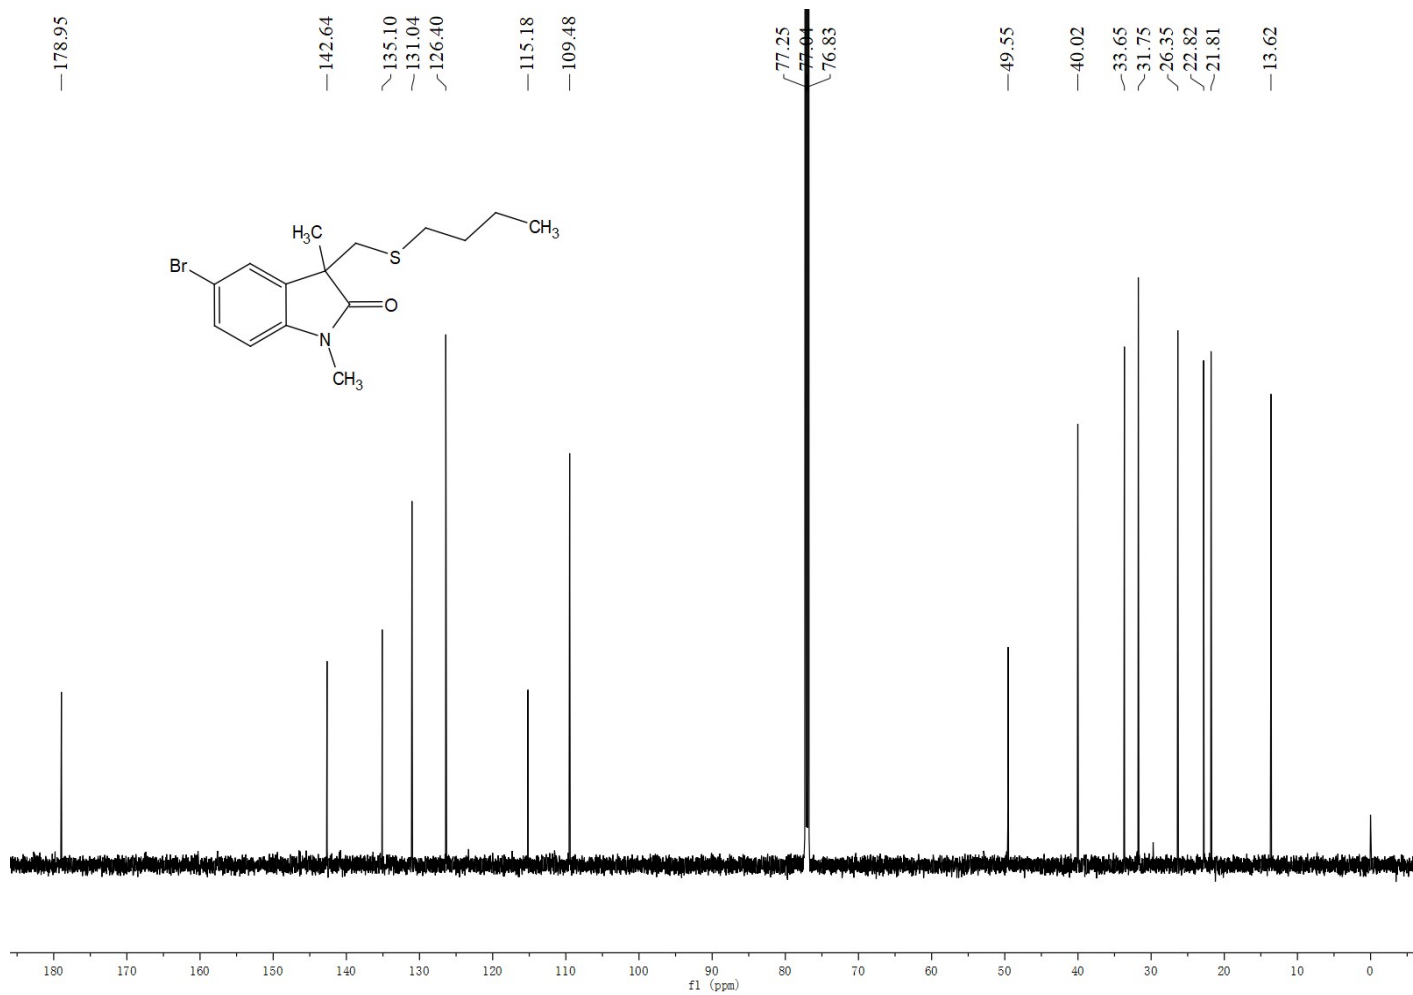

HRMS (ESI)

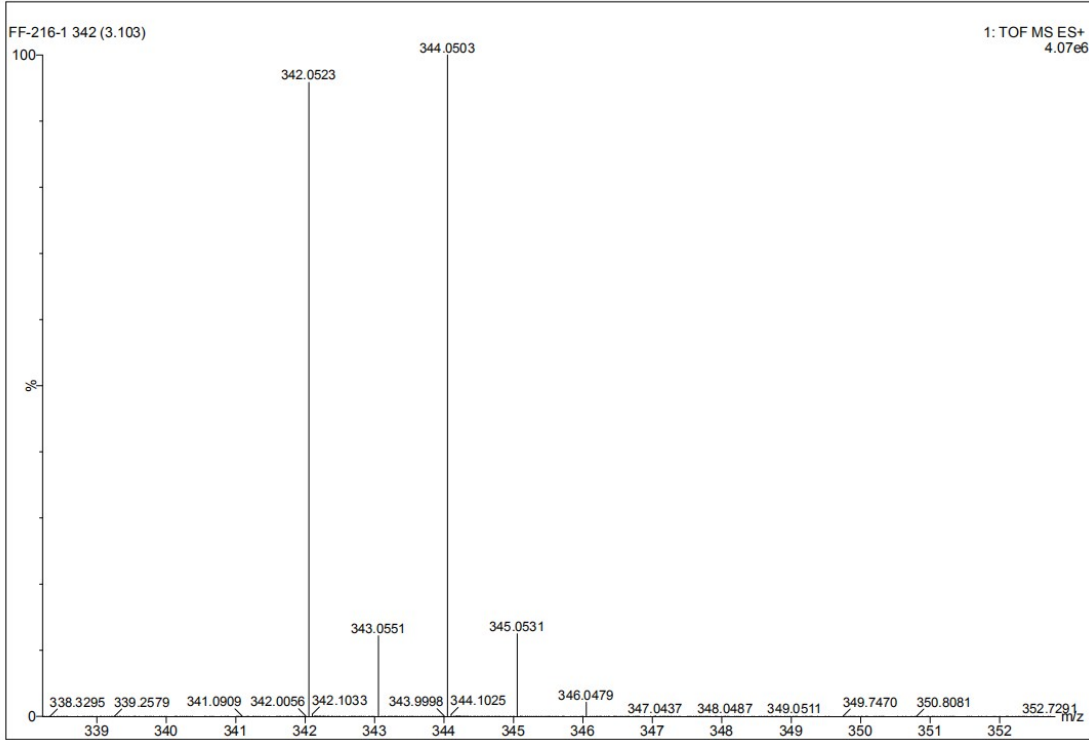

# 5-Bromo-3-(((3,5-dichlorophenyl)thio)methyl)-1,3-dimethylindolin-2-one (4f)

$^1\text{H}$  NMR (600 MHz,  $\text{CDCl}_3$ )

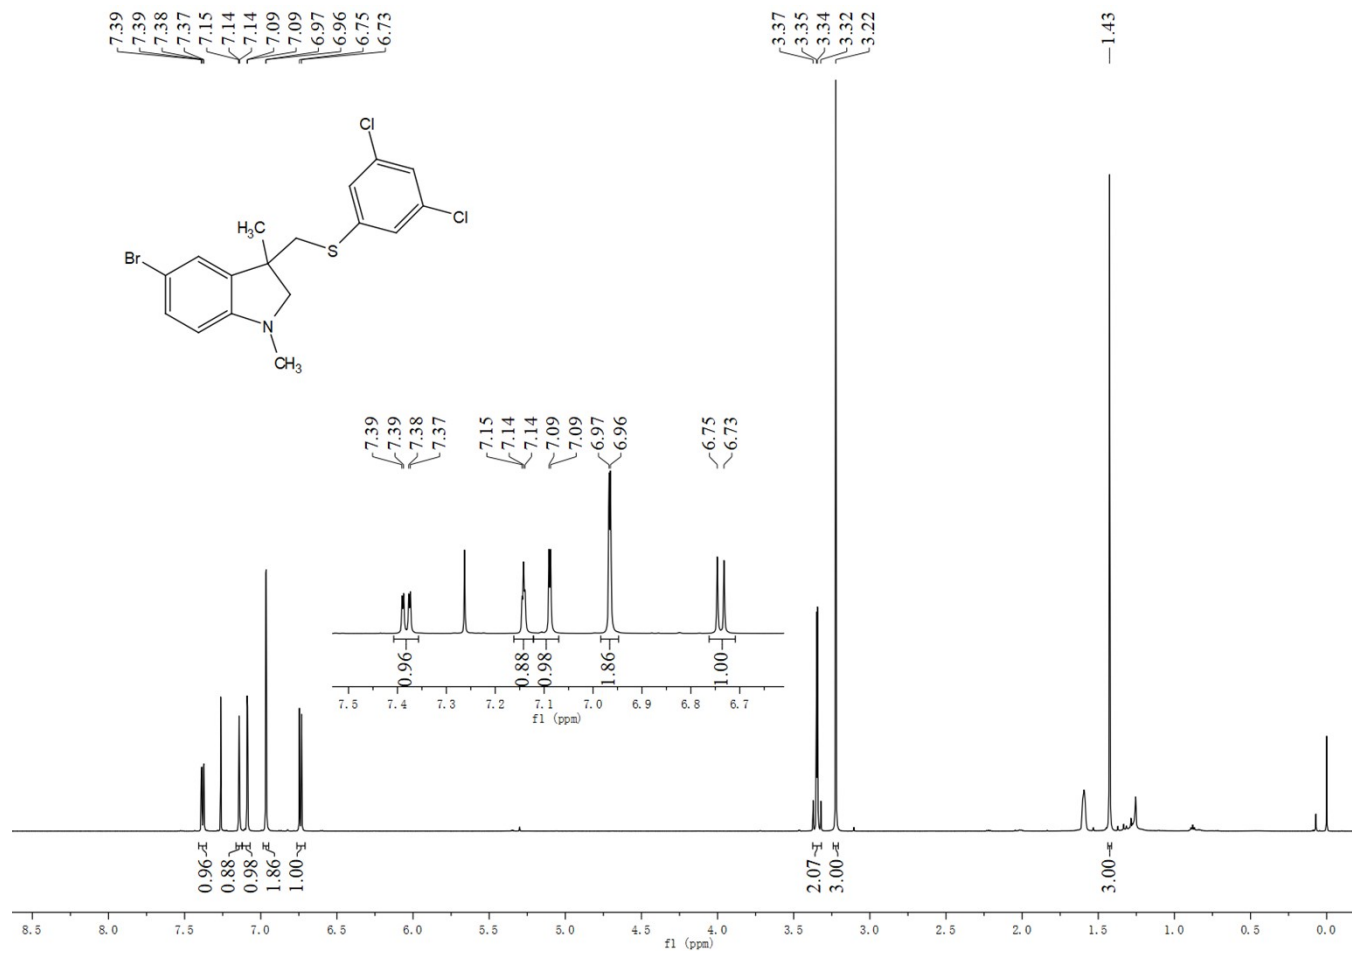

<sup>13</sup>C NMR (150 MHz, CDCl<sub>3</sub>)

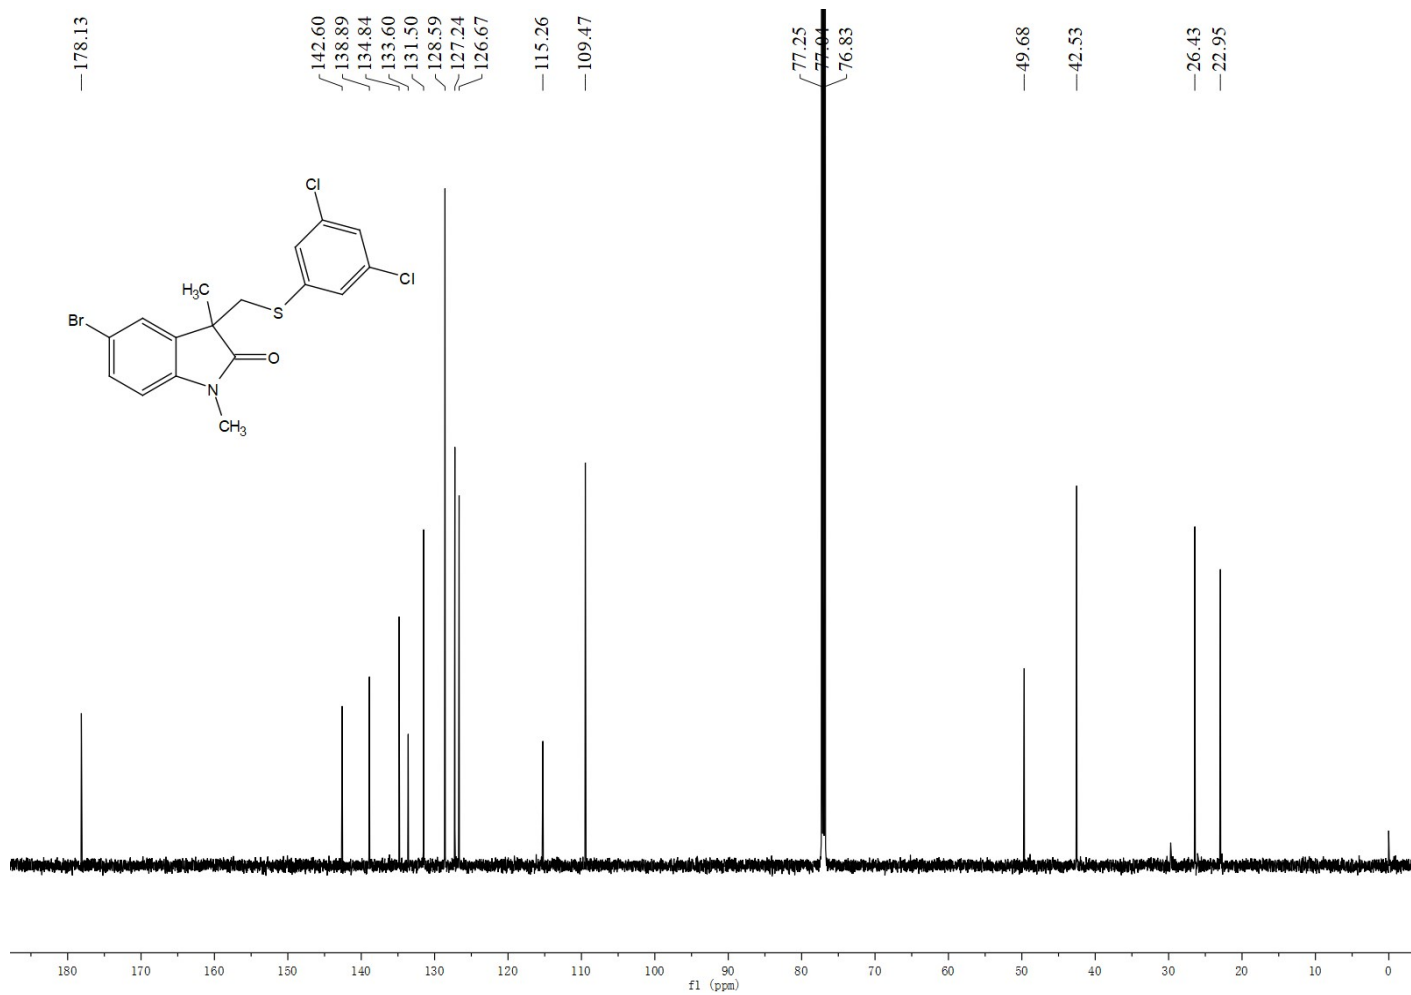

HRMS (ESI)

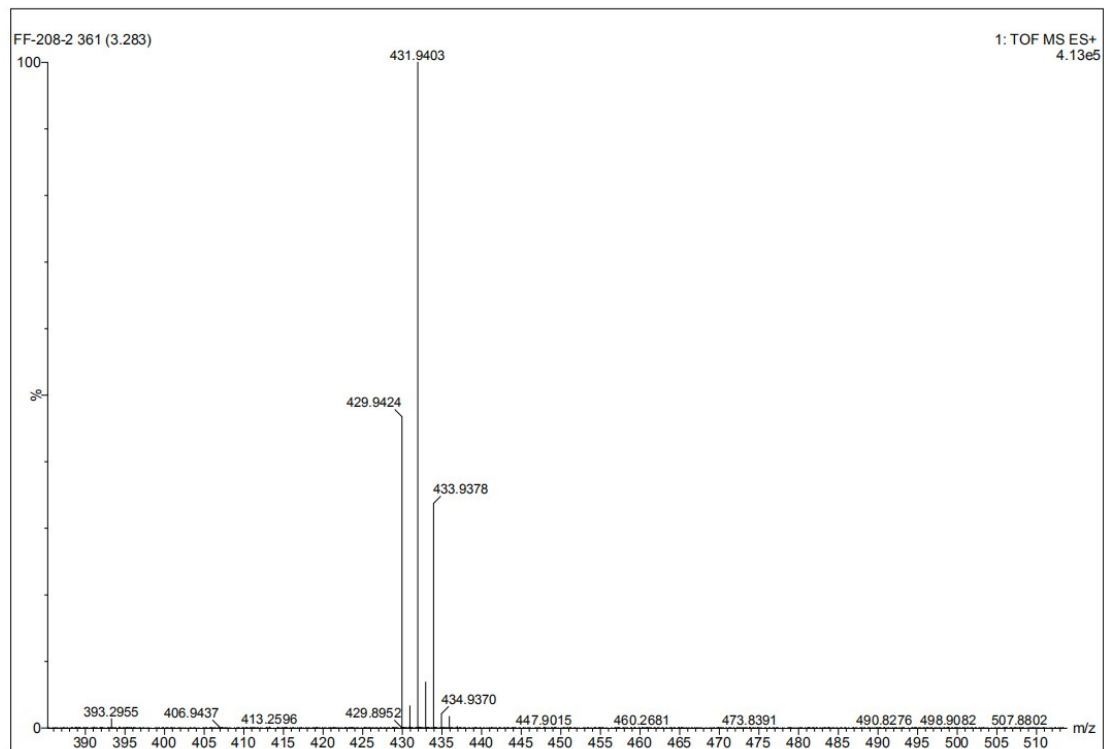

# 5-Bromo-3-methyl-1-phenyl-3-((phenylthio)methyl)indolin-2-one (4g)

<sup>1</sup>H NMR (600 MHz, CDCl<sub>3</sub>)

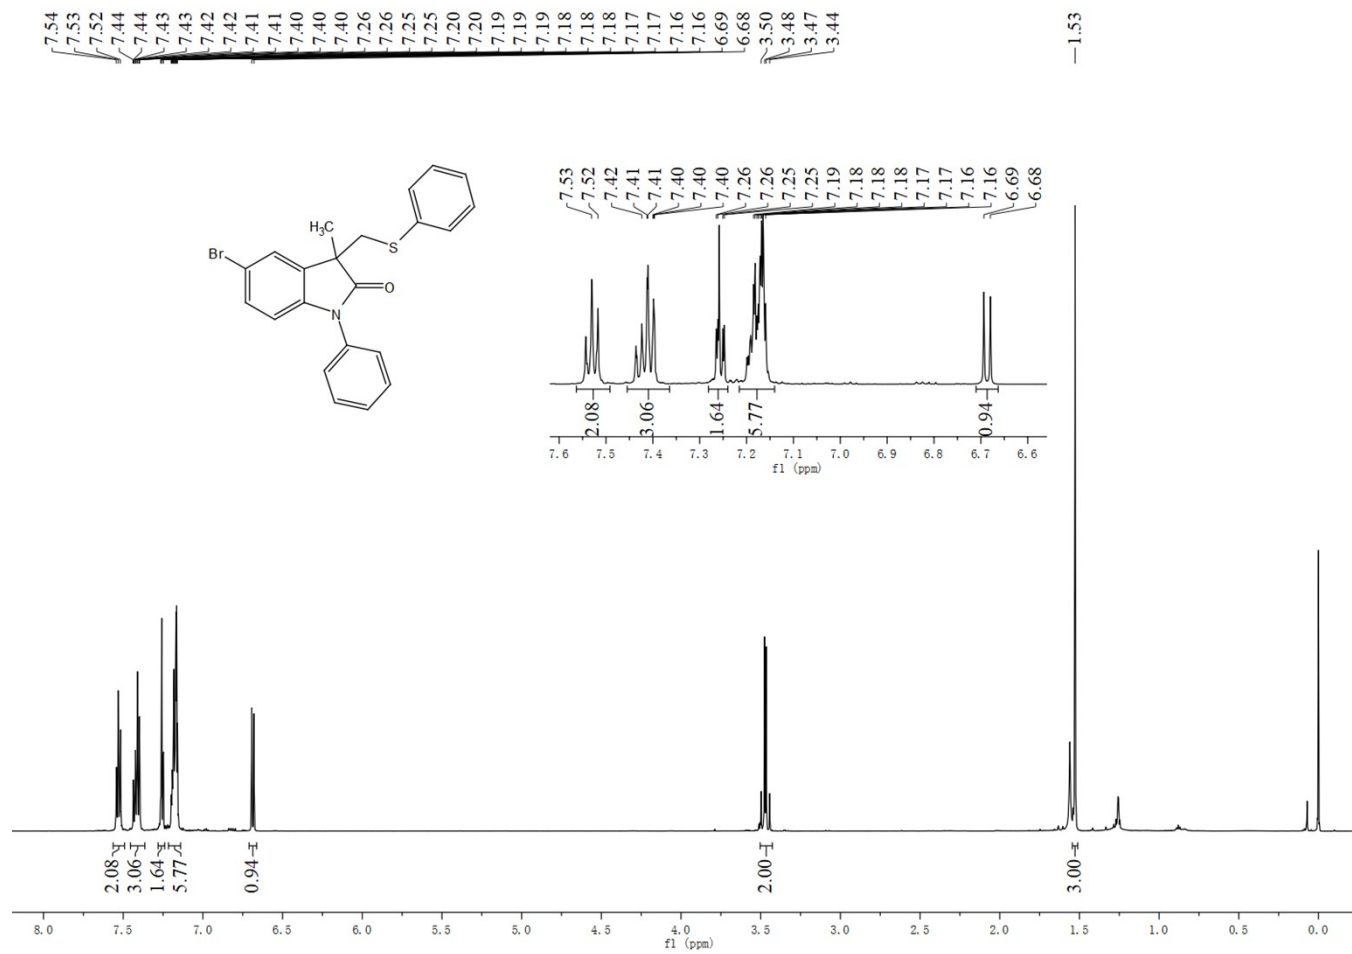



<sup>13</sup>C NMR (150 MHz, CDCl<sub>3</sub>)

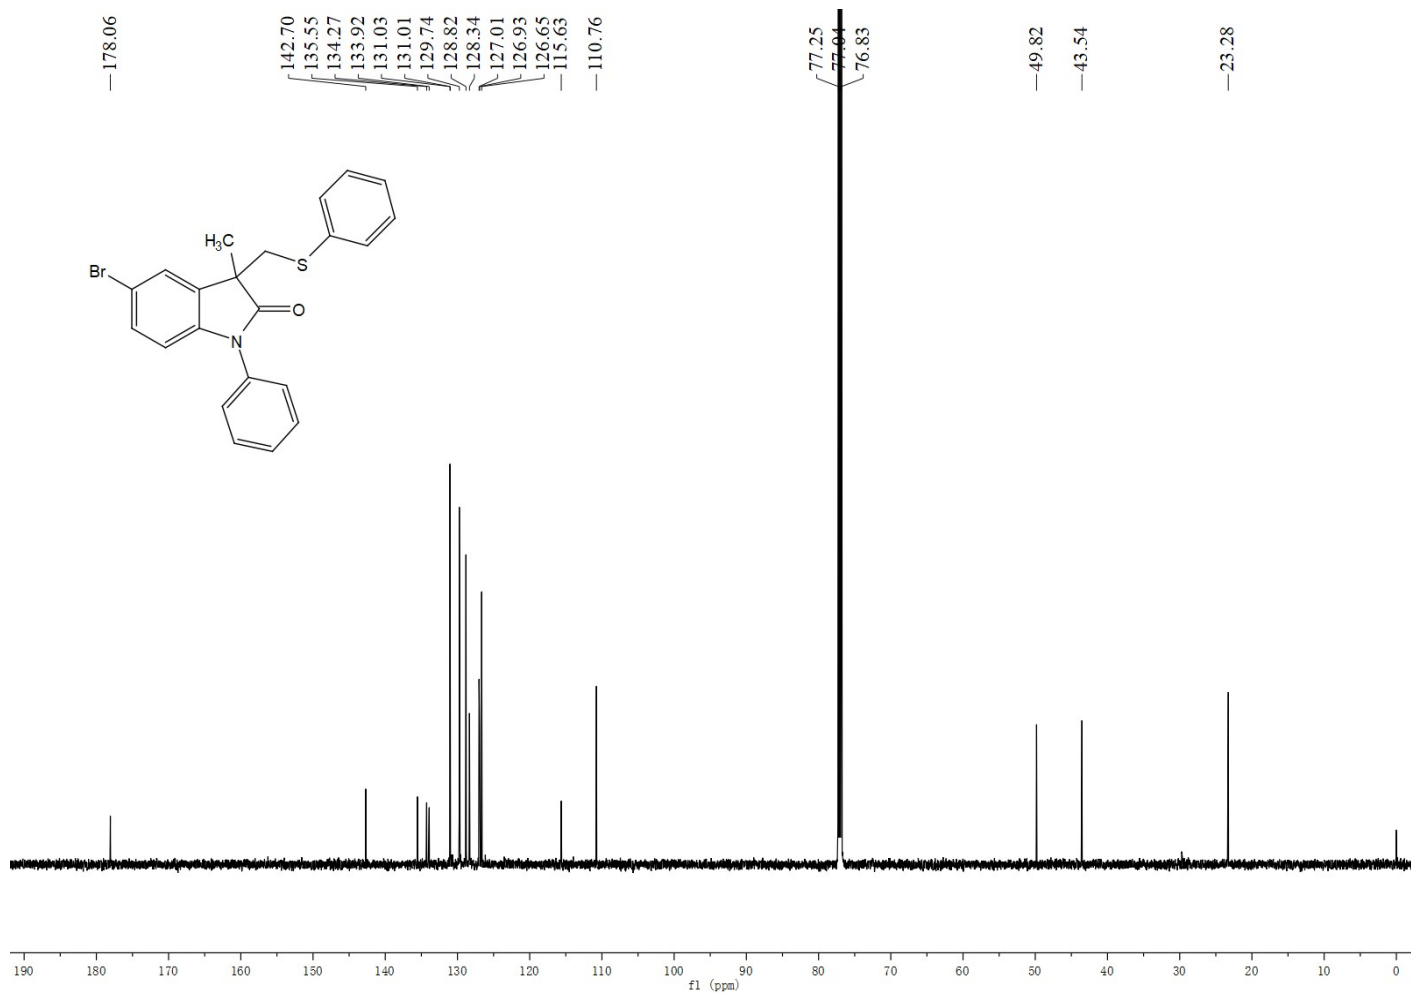

HRMS (ESI)

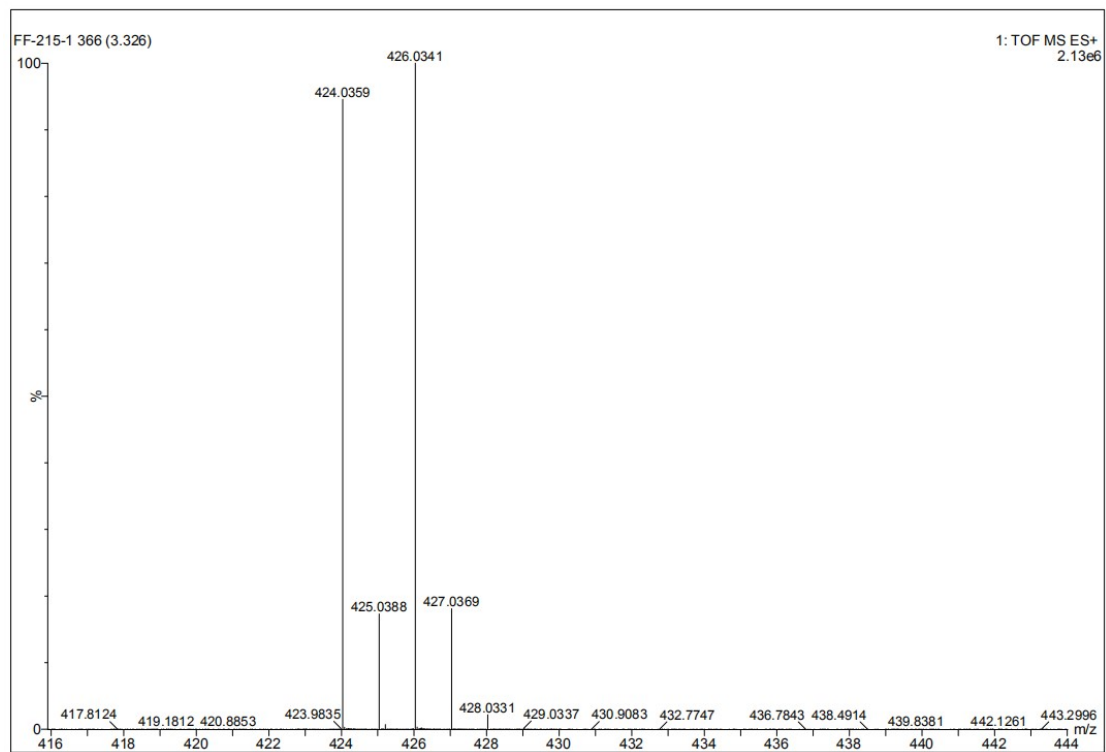

**8-Bromo-1-methyl-1-((phenylthio)methyl)-5,6-dihydro-4H-pyrrolo[3,2,1-ij]quinolin-2(1H)-one (4h)**

<sup>1</sup>H NMR (600 MHz, CDCl<sub>3</sub>)

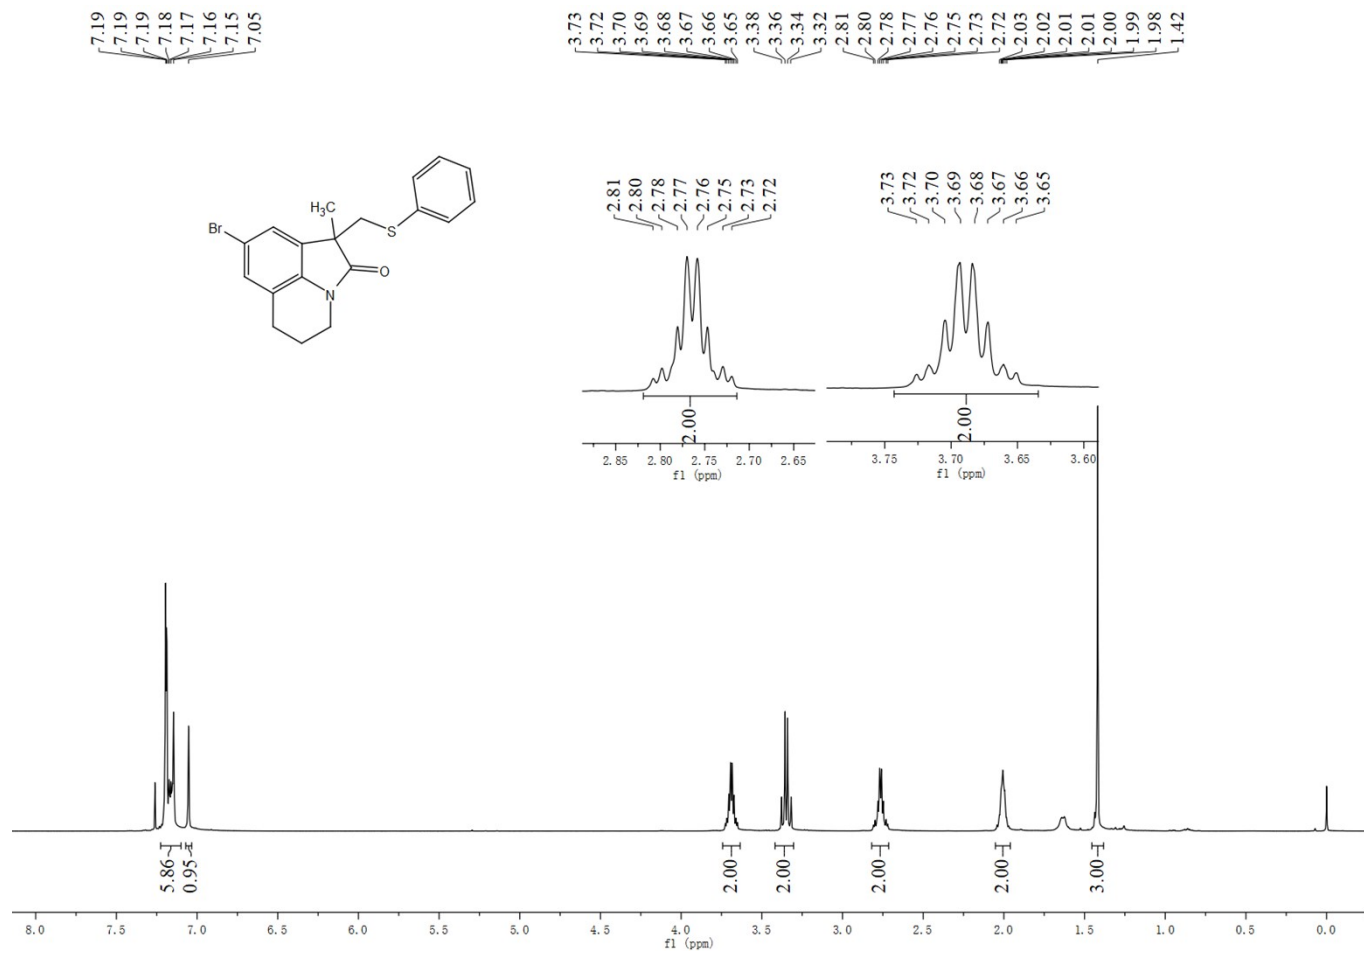

<sup>13</sup>C NMR (150 MHz, CDCl<sub>3</sub>)

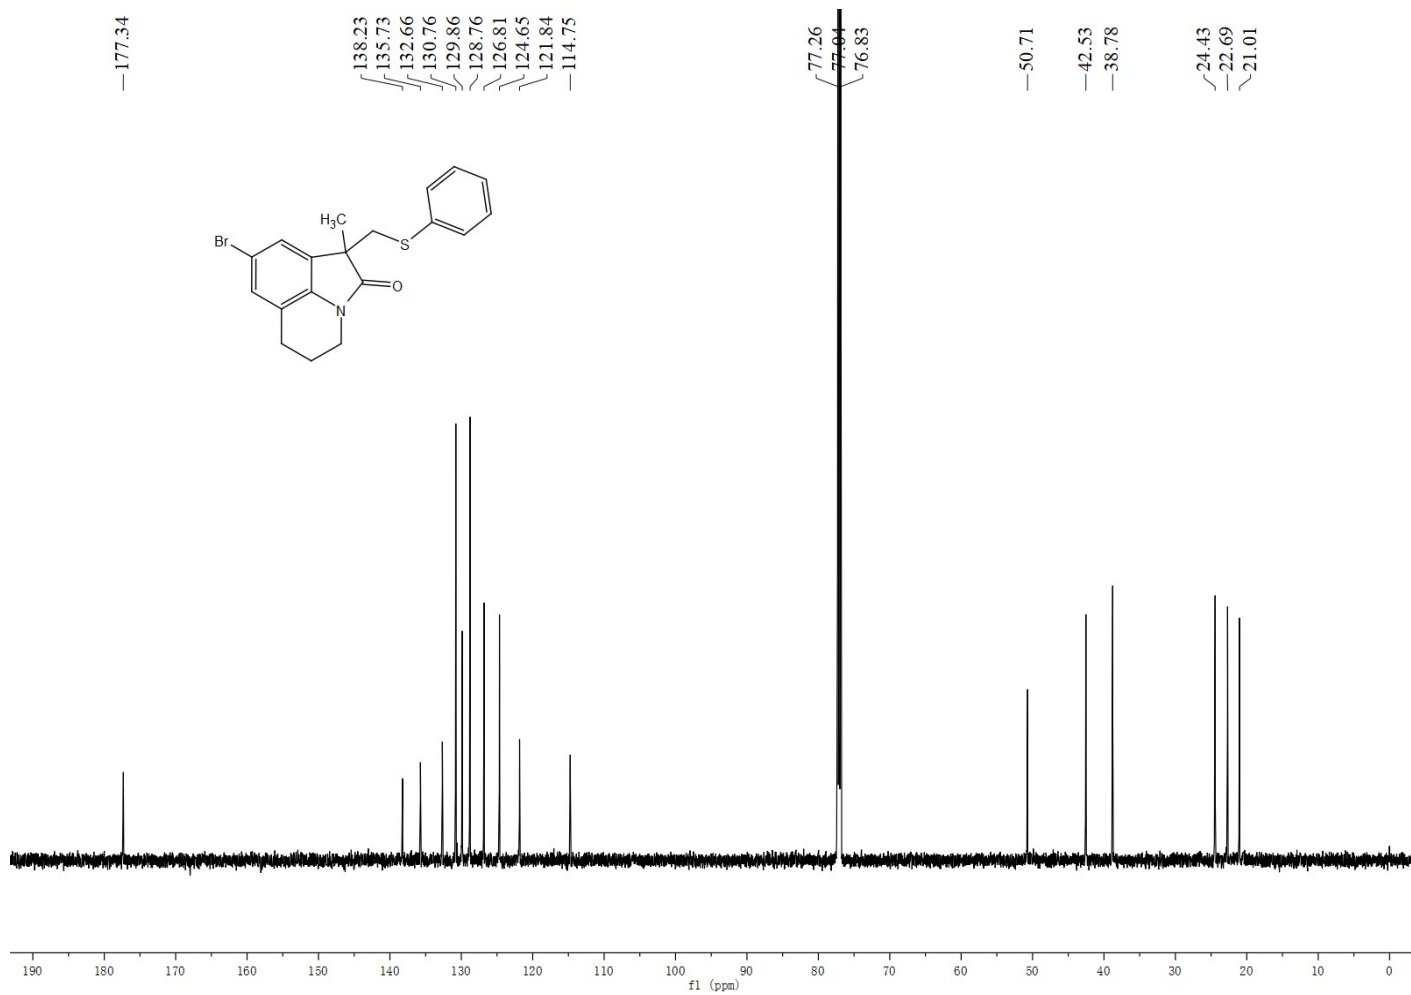

HRMS (ESI)

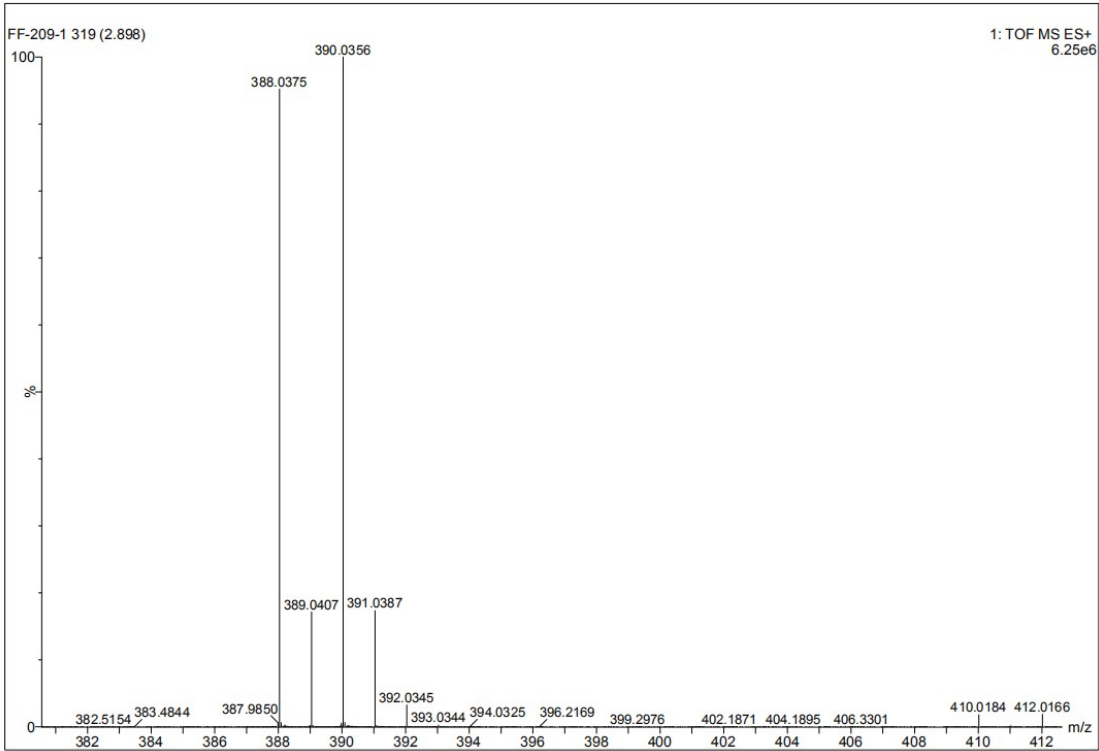

# 1,3-Dimethyl-3-((phenylsulfonyl)methyl)indolin-2-one (5)

<sup>1</sup>H NMR (600 MHz, CDCl<sub>3</sub>)

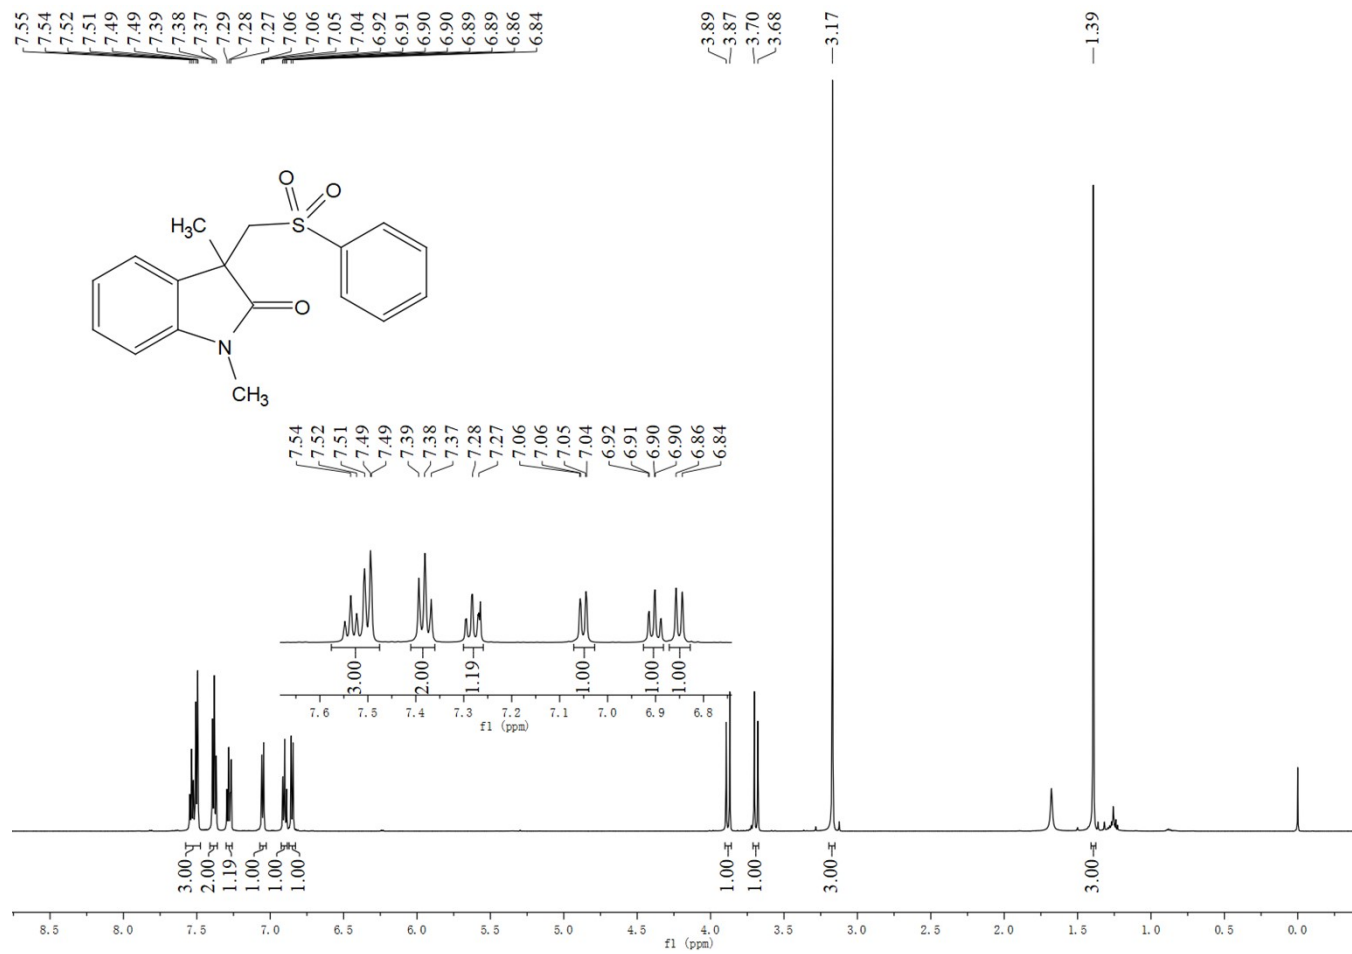

<sup>13</sup>C NMR (150 MHz, CDCl<sub>3</sub>)

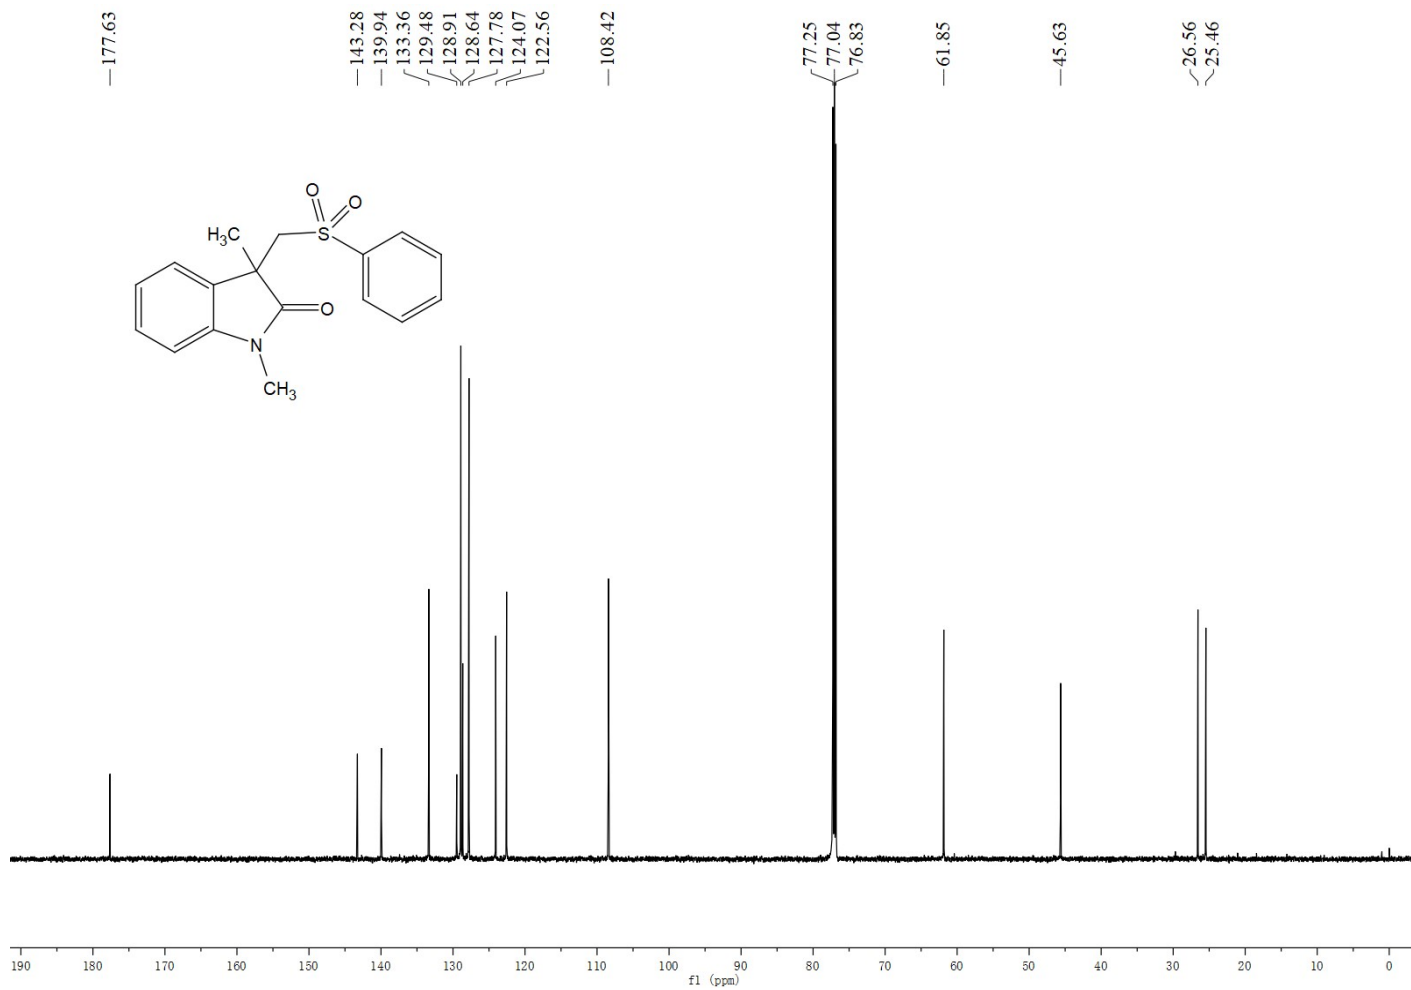

HRMS (ESI)

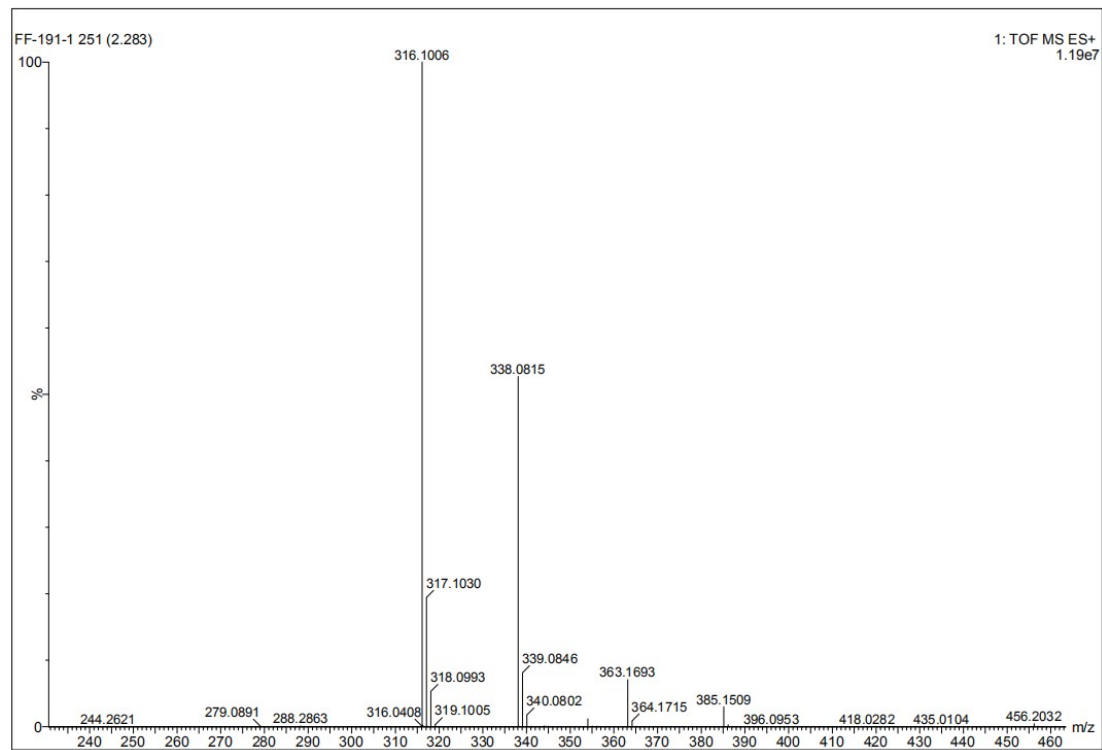



# 1,3-Dimethyl-3-((phenylsulfinyl)methyl)indolin-2-one (6)

<sup>1</sup>H NMR (400 MHz, CDCl<sub>3</sub>)

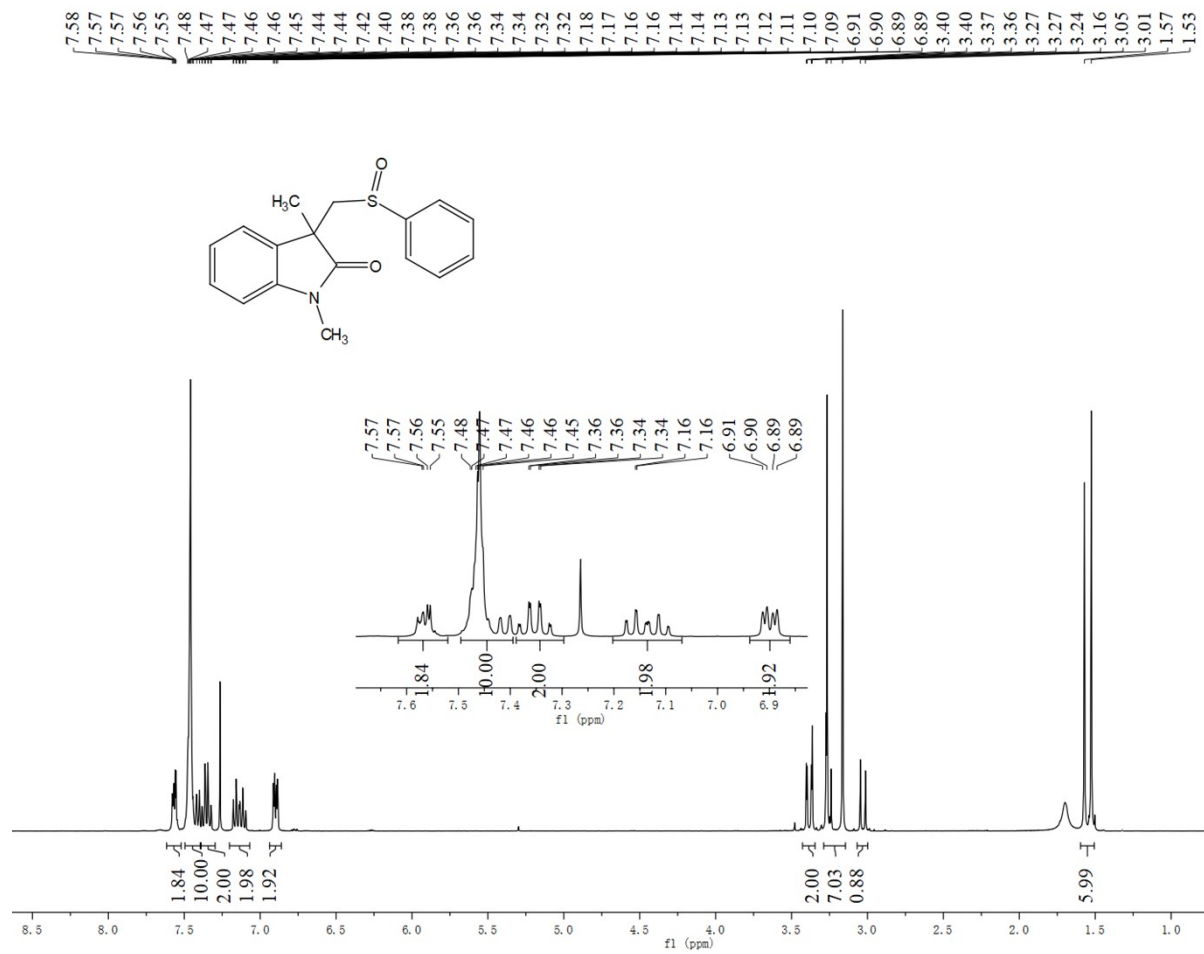

<sup>13</sup>C NMR (100 MHz, CDCl<sub>3</sub>)

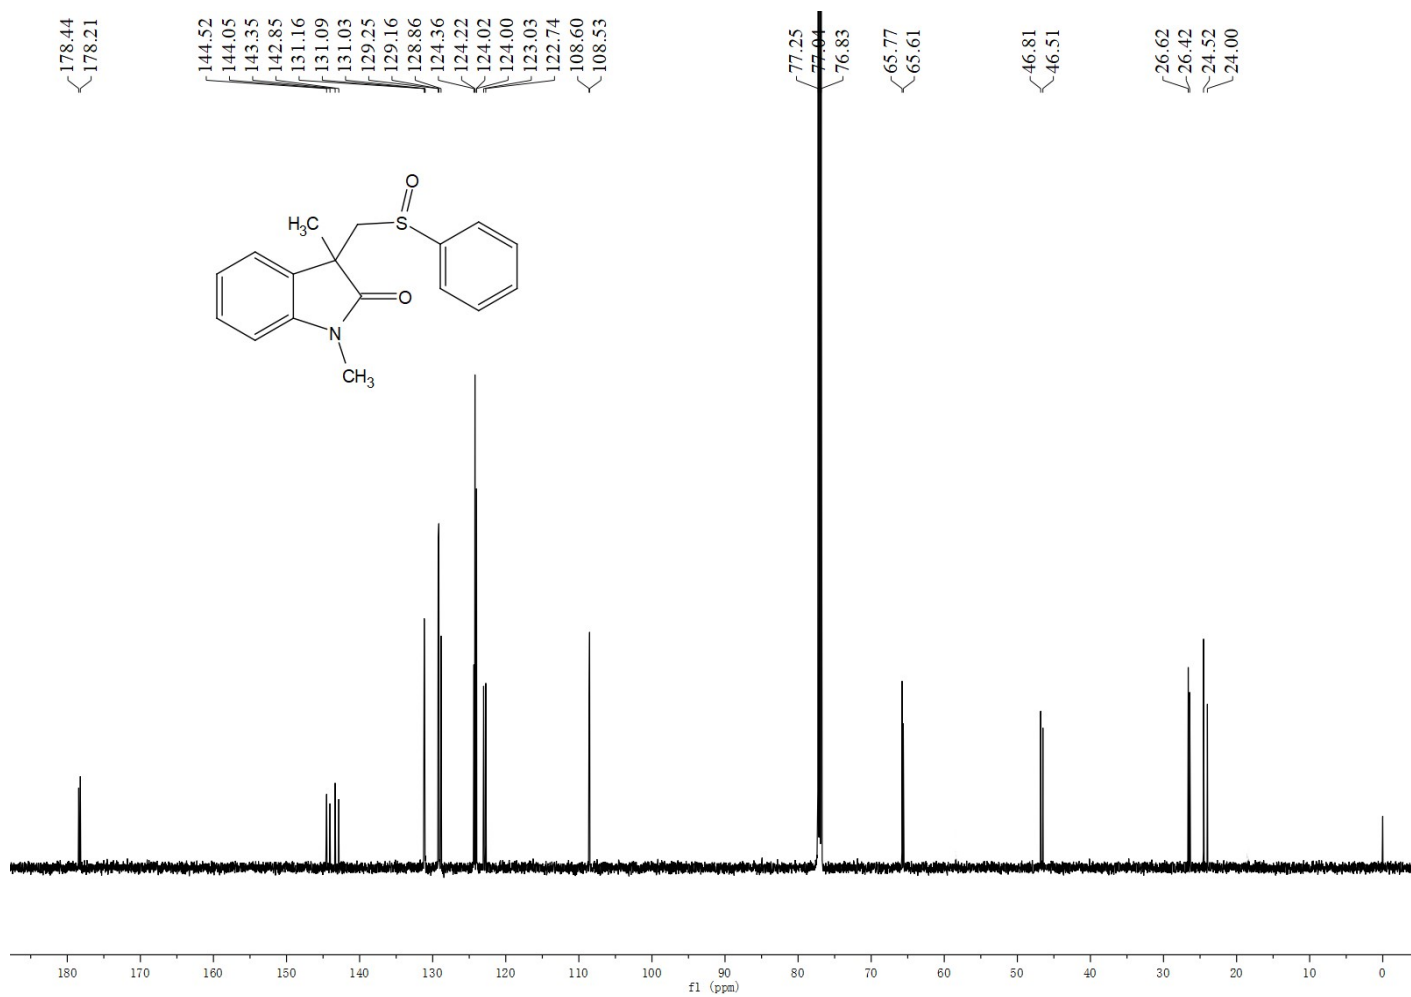

HRMS (ESI)

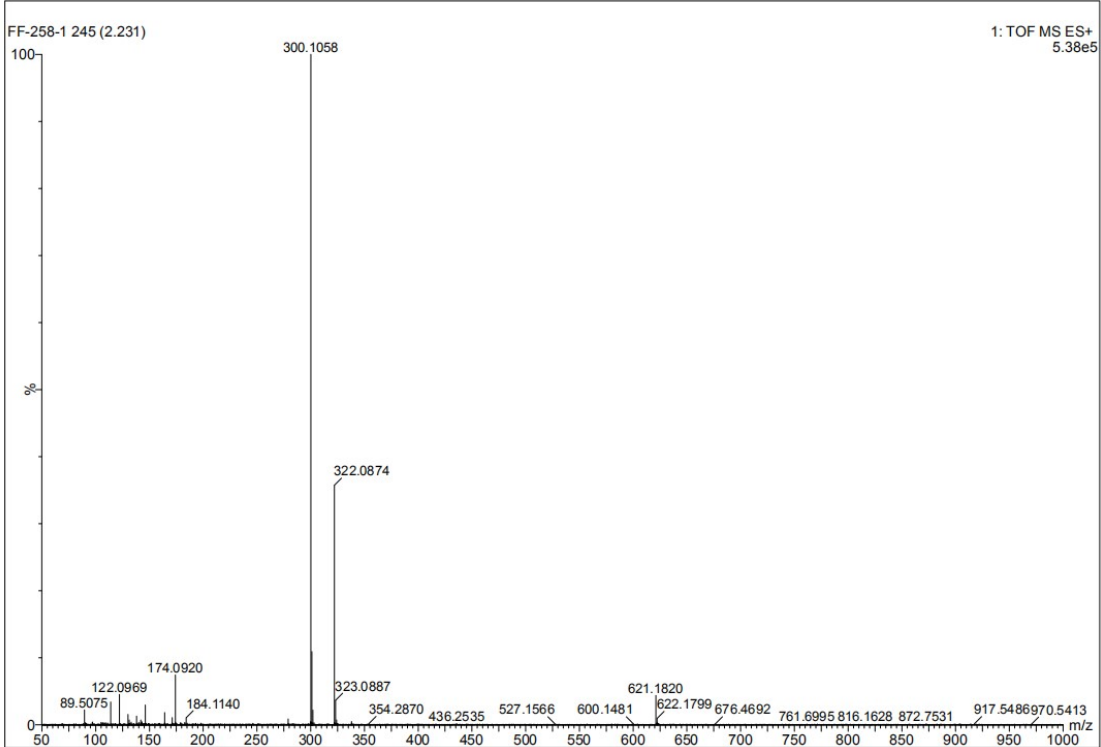

# 1,3-Dimethyl-3-((phenylthio)methyl)indoline (7)

<sup>1</sup>H NMR (400 MHz, CDCl<sub>3</sub>)

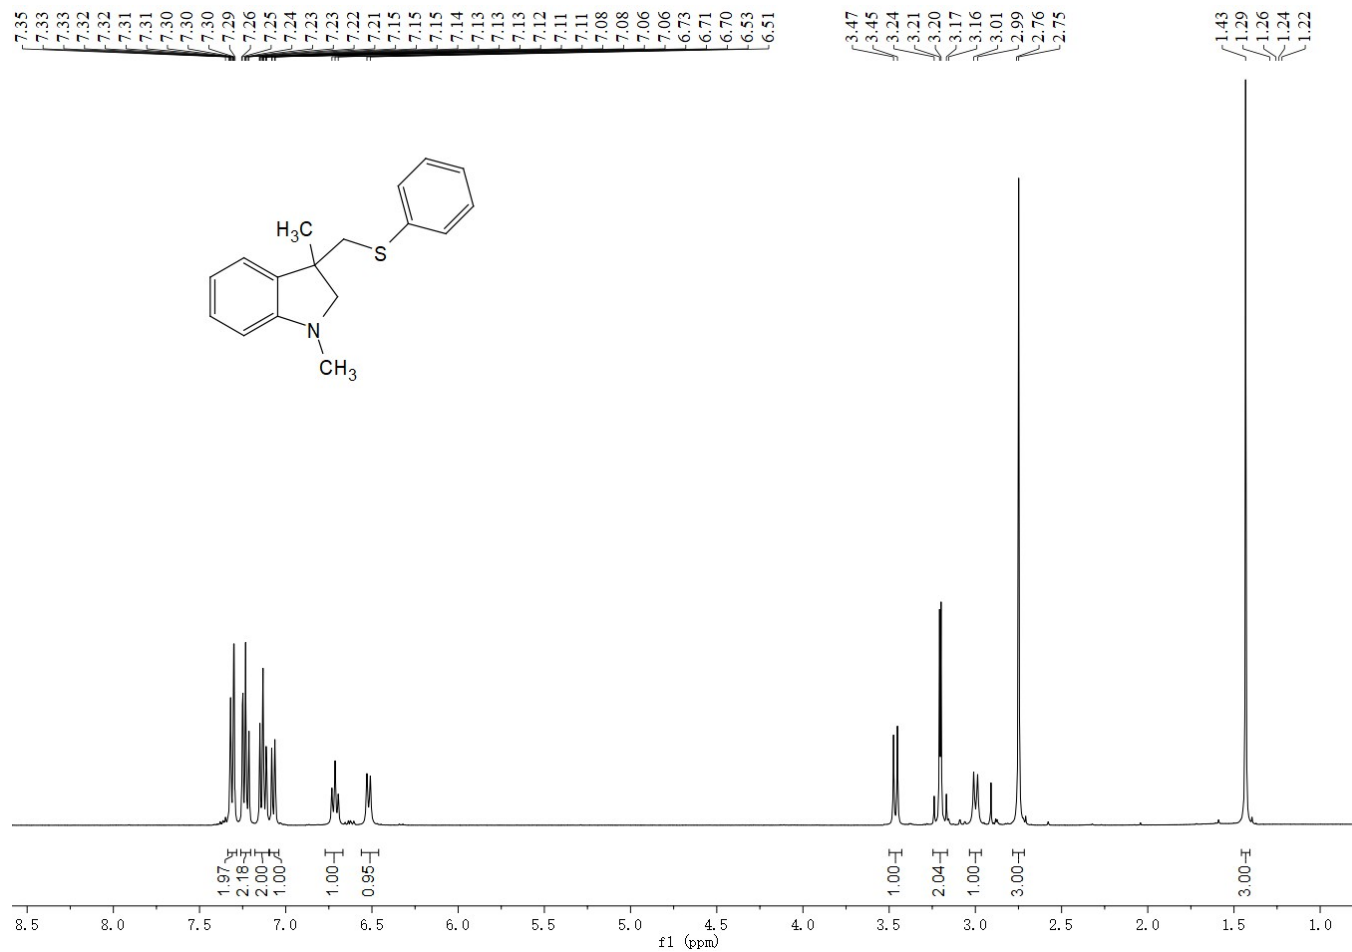

<sup>13</sup>C NMR (100 MHz, CDCl<sub>3</sub>)

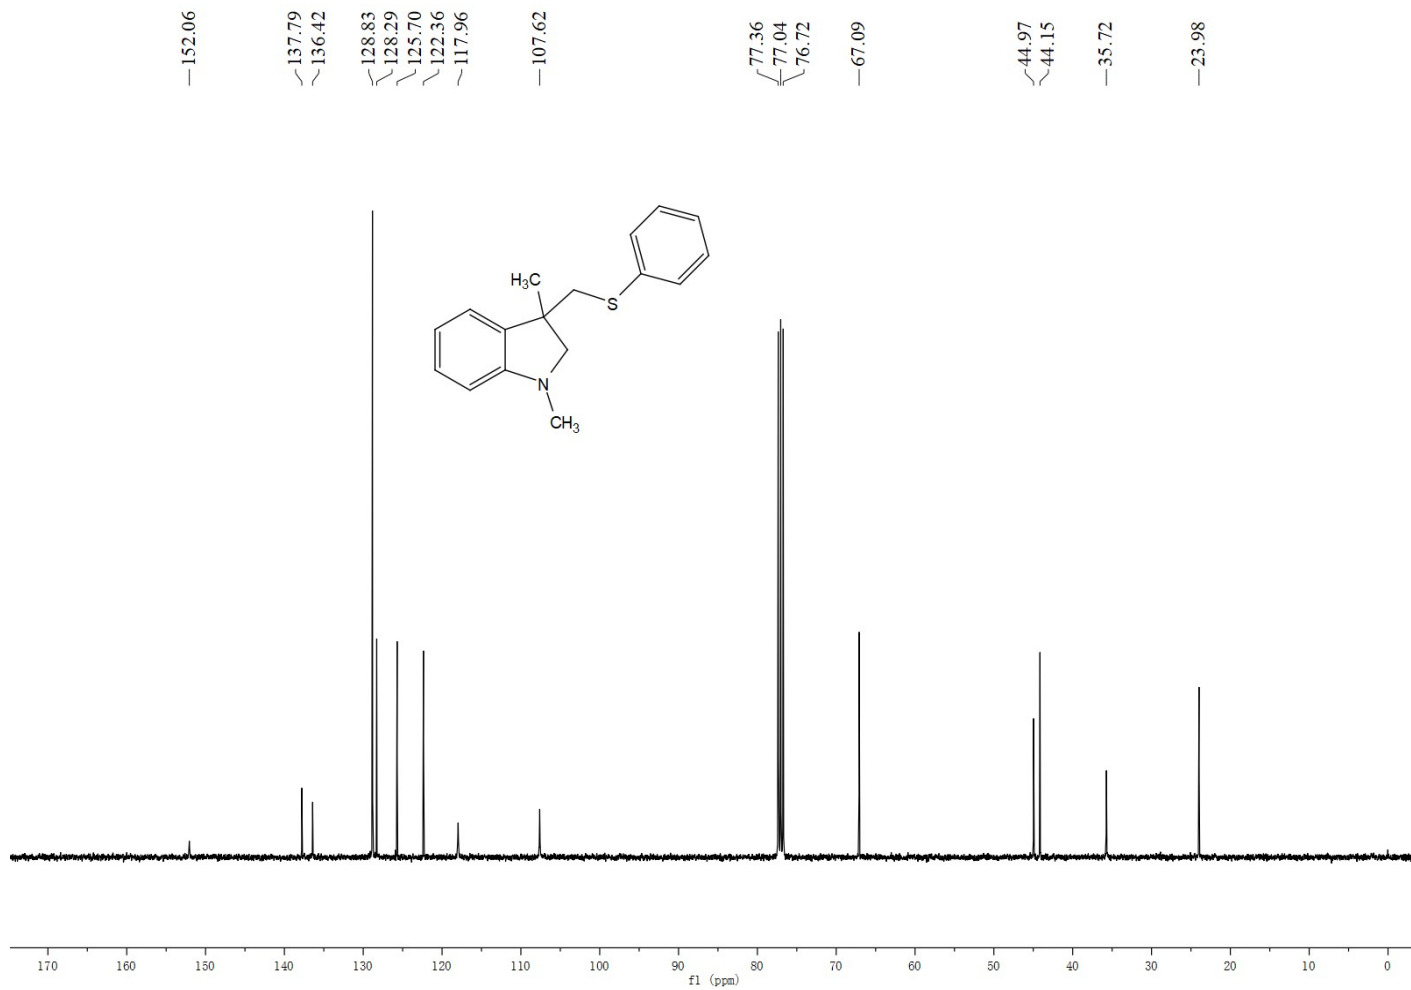

HRMS (ESI)

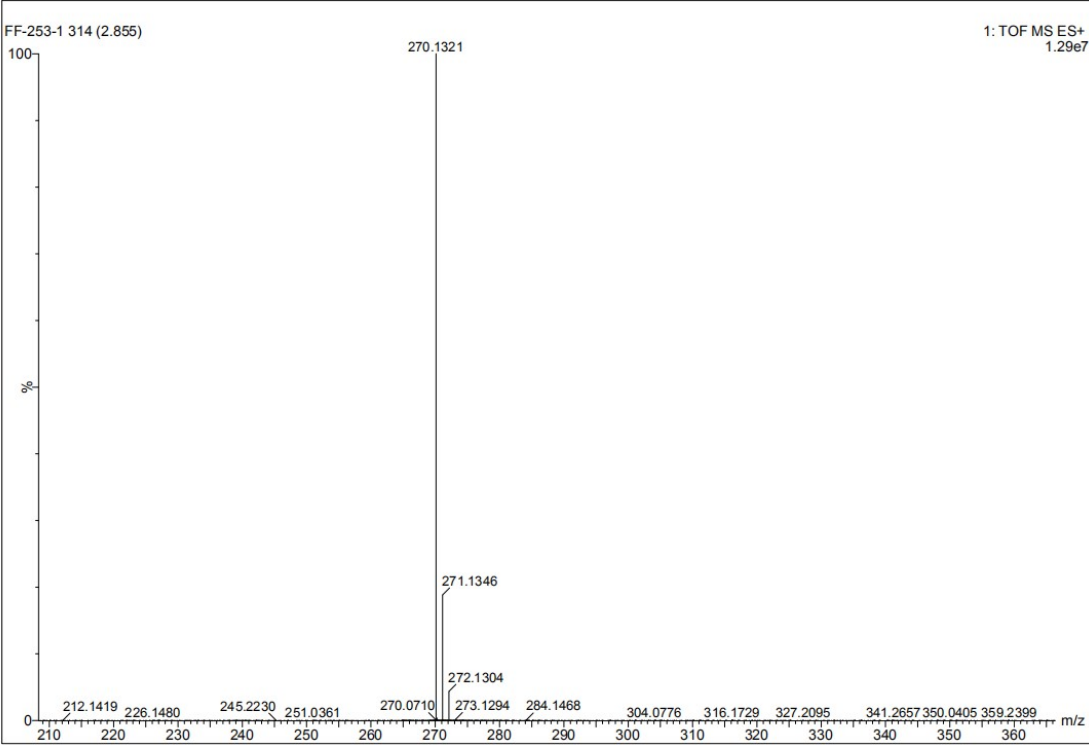

## 10. HRMS spectra of the control experiments

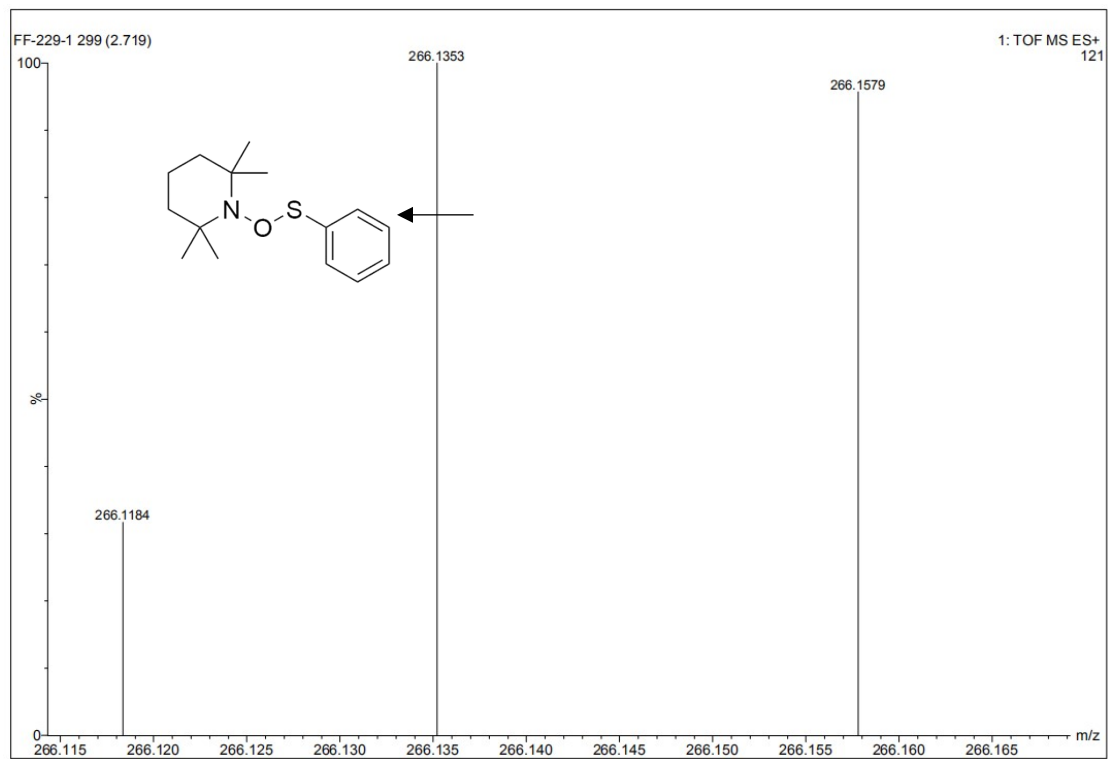

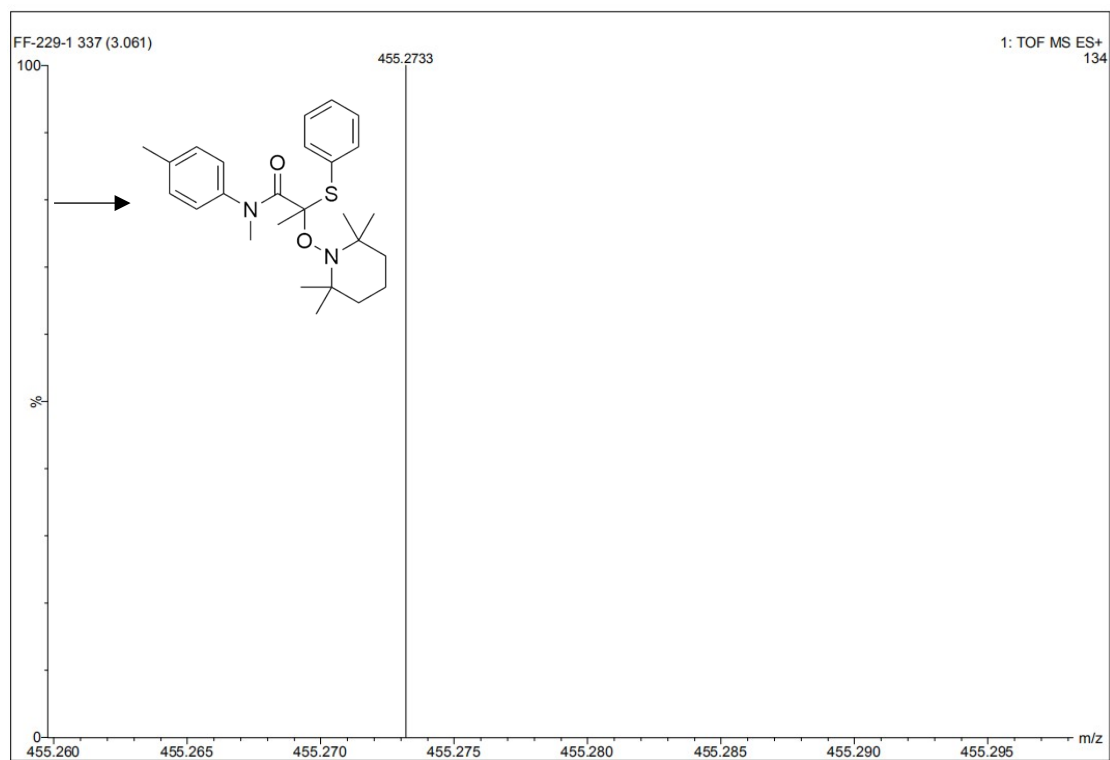

Supplement: d2ob00877g1.pdf [file d2ob00877g1.pdf]
